# Supplementary material for: A novel formation mechanism of NH 2 SO 3 H and its enhancing effect on methanesulfonic acid-methylamine aerosol particle formation in agriculture-developed and coastal industrial areas
Source: Copernicus journal article supplement (doi:10.5194/egusphere-2024-2638), 2024-10-22
Supplement: Supplementary file 1 [file egusphere-2024-2638-supplement.zip]

# Supporting information

-for-

## A novel formation mechanism of $\text{NH}_2\text{SO}_3\text{H}$ and its enhancing effect on methanesulfonic acid-methylamine aerosol particle formation in agriculture-developed and coastal industrial areas

Hui Wang <sup>a,‡</sup>, Shuqin Wei <sup>a,‡</sup>, Jihuan Yang <sup>a</sup>, Yanlong Yang <sup>a</sup>, Rongrong Li <sup>a</sup>, Rui Wang <sup>a</sup>,  
Chongqin Zhu <sup>b,\*</sup>, Tianlei Zhang <sup>a,\*</sup>, Changming Zhang <sup>c</sup>,

<sup>a</sup> Shaanxi Key Laboratory of Catalysis, School of Chemical & Environment Science, Shaanxi University of Technology, Hanzhong, Shaanxi 723001, P. R. China

<sup>b</sup> College of Chemistry, Key Laboratory of Theoretical & Computational Photochemistry of Ministry of Education, Beijing Normal University, Beijing 100190, China.

<sup>c</sup> School of Mechanical Engineering, Shaanxi University of Technology, Hanzhong, Shaanxi 723001, P. R. China

| S. NO | Caption                                                                                                                                                                                                                                                                                                                                                                                                                                                                                                                                                                                        |
|-------|------------------------------------------------------------------------------------------------------------------------------------------------------------------------------------------------------------------------------------------------------------------------------------------------------------------------------------------------------------------------------------------------------------------------------------------------------------------------------------------------------------------------------------------------------------------------------------------------|
| S1    | <b>Fig. S1</b> (a) The $z$ coordinates of $\text{HNSO}_2$ molecule as the function of simulation time; (b) the density profile of water; (c) the pie chart with the occurrence percentages of $\text{HNSO}_2$ molecule at the air-water interface and in water phase                                                                                                                                                                                                                                                                                                                           |
| S2-S3 | <b>Fig. S2</b> Optimized geometries of $\text{HNSO}_2$ , $\text{H}_2\text{O}$ , $\text{CH}_3\text{SO}_3\text{H}$ , $(\text{H}_2\text{O})_2$ , $\text{HNSO}_2\cdots\text{H}_2\text{O}$ and $\text{CH}_3\text{SO}_3\text{H}\cdots\text{H}_2\text{O}$ at the M06-2X/6-311++G(2df,2pd) level (bond distances in Angstroms and angles in degrees) along with the stabilization energies of $(\text{H}_2\text{O})_2$ , $\text{HNSO}_2\cdots\text{H}_2\text{O}$ and $\text{CH}_3\text{SO}_3\text{H}\cdots\text{H}_2\text{O}$ at the CCSD(T)-F12/cc-pVDZ-F12//M06-2X/6-311++G(2df,2pd) level of theory |
| S4-S5 | <b>Fig. S3</b> The optimized geometries and electric energies (in Hartree-Fock) for the complexes of $\text{HNSO}_2\cdots\text{H}_2\text{O}\cdots\text{CH}_3\text{SO}_3\text{H}$ at the M06-2X/6-311++G(2df,2pd) level of theory                                                                                                                                                                                                                                                                                                                                                               |
| S6    | <b>Fig. S4</b> The potential energy profile ( $\Delta G$ ) for the hydrolysis reaction of $\text{HNSO}_2$ without (a) and with (b) $\text{H}_2\text{O}$ at the CCSD(T)-F12/cc-pVDZ-F12//M06-2X/6-311++G(2df,2pd) level of theory                                                                                                                                                                                                                                                                                                                                                               |
| S7    | <b>Table S1</b> Zero point energy (ZPE/(kcal·mol <sup>-1</sup> )), entropies (S/(cal·mol <sup>-1</sup> ·K <sup>-1</sup> )), relative energies ( $\Delta E$ and $\Delta(E + \text{ZPE})$ /(kcal·mol <sup>-1</sup> )), enthalpies ( $\Delta H(298)$ /(kcal·mol <sup>-1</sup> )), and free energies ( $\Delta G(298)$ /(kcal·mol <sup>-1</sup> )) for the hydrolysis reaction of $\text{HNSO}_2$ without and with $\text{H}_2\text{O}$ and $\text{CH}_3\text{SO}_3\text{H}$                                                                                                                       |
| S8    | <b>Table S2</b> Equilibrium constants (cm <sup>3</sup> ·molecule <sup>-1</sup> ) for the $\text{HNSO}_2\cdots\text{H}_2\text{O}$ , $\text{H}_2\text{O}\cdots\text{H}_2\text{O}$ , and $\text{CH}_3\text{SO}_3\text{H}\cdots\text{H}_2\text{O}$ complexes within the temperature range of 212.6-320.0 K                                                                                                                                                                                                                                                                                         |
| S9    | <b>Table S3</b> The high-pressure limiting rate constant (cm <sup>3</sup> ·molecule <sup>-1</sup> ·s <sup>-1</sup> ) for the hydrolysis reaction of $\text{HNSO}_2$ with $\text{H}_2\text{O}$ and $\text{CH}_3\text{SO}_3\text{H}$ within the temperature range of 212.6-320.0 K                                                                                                                                                                                                                                                                                                               |
| S10   | Part 1. Calculations of reaction rate coefficients                                                                                                                                                                                                                                                                                                                                                                                                                                                                                                                                             |

\* Corresponding authors, Tel: +86-0916-2641083, Fax: +86-0916-2641083.

E-mail: [cqzhu@bnu.edu.cn](mailto:cqzhu@bnu.edu.cn) (C. Q. Zhu), [ztianlei88@163.com](mailto:ztianlei88@163.com) (T. L. Zhang).

<sup>‡</sup> These authors contributed equally to this work.

|         |                                                                                                                                                                                                                                                                                                                                                                                                                                |
|---------|--------------------------------------------------------------------------------------------------------------------------------------------------------------------------------------------------------------------------------------------------------------------------------------------------------------------------------------------------------------------------------------------------------------------------------|
| S11     | <b>Table S4</b> Rate coefficients ( $k$ , $\text{cm}^3 \cdot \text{molecule}^{-1} \cdot \text{s}^{-1}$ ) for the hydrolysis of $\text{HNSO}_2$ by master equation within the temperature range of 212.6-320.0 K                                                                                                                                                                                                                |
| S12     | <b>Table S5</b> Concentrations ( $\text{molecules} \cdot \text{cm}^{-3}$ ) of $\text{H}_2\text{O}$ and $\text{CH}_3\text{SO}_3\text{H}$ within the temperature range of 213-320 K and altitude range of 0-15 km                                                                                                                                                                                                                |
| S13     | <b>Fig. S5</b> The dynamic trajectories of $\text{CH}_3\text{SO}_3\text{H}$ -assisted gaseous hydrolysis of $\text{HNSO}_2$                                                                                                                                                                                                                                                                                                    |
| S14     | <b>Fig. S6</b> (a) The $z$ coordinates of MSA molecule as the function of simulation time; (b) the density profile of water; (c) the pie chart with the occurrence percentages of MSA molecule at the air-water interface and in water phase                                                                                                                                                                                   |
| S15     | <b>Fig. S7</b> (a) The $z$ coordinates of complex $\text{HNSO}_2 \cdots \text{CH}_3\text{SO}_3\text{H}$ as the function of simulation time; (b) the density profile of water; (c) the pie chart with the occurrence percentages of complex $\text{HNSO}_2 \cdots \text{CH}_3\text{SO}_3\text{H}$ at the air-water interface and in water phase                                                                                 |
| S16     | <b>Fig. S8</b> Snapshot structures taken from the BOMD simulations of $\text{HNSO}_2$ reaction at the air-water interface                                                                                                                                                                                                                                                                                                      |
| S17     | <b>Fig. S9</b> Snapshot structures taken from the BOMD simulations of $\text{CH}_3\text{SO}_3\text{H}$ reaction at the air-water interface                                                                                                                                                                                                                                                                                     |
| S16-S21 | <b>Fig. S10</b> BOMD simulation trajectories and snapshots of $\text{CH}_3\text{SO}_3\text{H}^-$ and $\text{H}_3\text{O}^+$ ions forming mechanism via the chain structure routes in $\text{CH}_3\text{SO}_3\text{H}$ -mediated hydration $\text{HNSO}_2$ at the air-water interface                                                                                                                                           |
| S22-S24 | <b>Fig. S11</b> BOMD simulation trajectories and snapshots of $\text{CH}_3\text{SO}_3\text{H}^-$ and $\text{H}_3\text{O}^+$ ions forming mechanism via loop structure routes in $\text{CH}_3\text{SO}_3\text{H}$ -mediated hydration $\text{HNSO}_2$ at the air-water interface                                                                                                                                                |
| S25-S26 | <b>Fig. S12</b> BOMD simulation trajectories and snapshots of proton exchange mechanism in $\text{CH}_3\text{SO}_3\text{H}$ -mediated hydration $\text{HNSO}_2$ with a water molecule at the air-water interface                                                                                                                                                                                                               |
| S27-S33 | <b>Fig. S13</b> BOMD simulation trajectories and snapshots of proton exchange mechanism in $\text{CH}_3\text{SO}_3\text{H}$ -mediated hydration $\text{HNSO}_2$ with two water molecules at the air-water interface                                                                                                                                                                                                            |
| S34-S35 | <b>Fig. S14</b> BOMD simulation trajectories and snapshots of proton exchange mechanism in $\text{CH}_3\text{SO}_3\text{H}$ -mediated hydration $\text{HNSO}_2$ with three water molecules at the air-water interface                                                                                                                                                                                                          |
| S36     | <b>Fig. S15</b> The most stable configurations of the SFA-MSA-MA-based clusters identified at the M06-2X/6-311++G(2df,2pd) level of theory. The lengths of hydrogen bonds are given in Å (Color code: blue = nitrogen, yellow = sulfur, red = oxygen, gray = carbon, and white = hydrogen)                                                                                                                                     |
| S37     | <b>Fig. S16</b> (a) The $J(\text{cm}^{-3} \text{s}^{-1})$ and (b) $R$ as a function of $[\text{MSA}]$ with $[\text{SFA}] = 10^8 \text{ molecules cm}^{-3}$ and three different $[\text{MA}]$ (black line: $[\text{MA}] = 2.5 \times 10^7 \text{ molecules cm}^{-3}$ , red line: $[\text{MA}] = 2.5 \times 10^8 \text{ molecules cm}^{-3}$ , blue line: $[\text{MA}] = 2.5 \times 10^9 \text{ molecules cm}^{-3}$ ) at 238.15 K |
| S38     | <b>Fig. S17</b> (a) The $J(\text{cm}^{-3} \text{s}^{-1})$ and (b) $R$ as a function of $[\text{MSA}]$ with $[\text{SFA}] = 10^8 \text{ molecules cm}^{-3}$ and three different $[\text{MA}]$ (black line: $[\text{MA}] = 2.5 \times 10^7 \text{ molecules cm}^{-3}$ , red line: $[\text{MA}] = 2.5 \times 10^8 \text{ molecules cm}^{-3}$ , blue line: $[\text{MA}] = 2.5 \times 10^9 \text{ molecules cm}^{-3}$ ) at 258.15 K |
| S39     | <b>Fig. S18</b> (a) The $J(\text{cm}^{-3} \text{s}^{-1})$ and (b) $R$ as a function of $[\text{MSA}]$ with $[\text{SFA}] = 10^8 \text{ molecules cm}^{-3}$ and three different $[\text{MA}]$ (black line: $[\text{MA}] = 2.5 \times 10^7 \text{ molecules cm}^{-3}$ , red line: $[\text{MA}] = 2.5 \times 10^8 \text{ molecules cm}^{-3}$ , blue line: $[\text{MA}] = 2.5 \times 10^9 \text{ molecules cm}^{-3}$ ) at 298.15 K |
| S40     | <b>Fig. S19</b> Main cluster formation mechanism of MSA-MA-SFA-based system at 238.15 K, $[\text{MSA}] = 10^7 \text{ molecules} \cdot \text{cm}^{-3}$ , $[\text{MA}] = 2.5 \times 10^8 \text{ molecules} \cdot \text{cm}^{-3}$ , and $[\text{SFA}] = 10^6 \text{ molecules} \cdot \text{cm}^{-3}$ . The black arrows indicate the pure MSA-MA-based growth pathways. Blue arrows represent the pathways containing SFA         |
| S41     | <b>Fig. S20</b> Main cluster formation mechanism of MSA-MA-SFA-based system at 258.15 K, $[\text{MSA}] = 10^7 \text{ molecules} \cdot \text{cm}^{-3}$ , $[\text{MA}] = 2.5 \times 10^8 \text{ molecules} \cdot \text{cm}^{-3}$ , and $[\text{SFA}] = 10^6$                                                                                                                                                                     |

|         |                                                                                                                                                                                                                                                                                                                                                                                              |
|---------|----------------------------------------------------------------------------------------------------------------------------------------------------------------------------------------------------------------------------------------------------------------------------------------------------------------------------------------------------------------------------------------------|
|         | molecules·cm <sup>-3</sup> . The black arrows indicate the pure MSA-MA-based growth pathways. Blue arrows represent the pathways containing SFA                                                                                                                                                                                                                                              |
| S42     | <b>Fig. S21</b> Main cluster formation mechanism of MSA-MA-SFA-based system at 298.15 K, [MSA] = 10 <sup>7</sup> molecules·cm <sup>-3</sup> , [MA] = 2.5 × 10 <sup>8</sup> molecules·cm <sup>-3</sup> , and [SFA] = 10 <sup>6</sup> molecules·cm <sup>-3</sup> . The black arrows indicate the pure MSA-MA-based growth pathways. Blue arrows represent the pathways containing SFA          |
| S43     | <b>Table S6</b> The Gibbs free energy for the formation of (SFA) <sub>x</sub> (MSA) <sub>y</sub> (MA) <sub>z</sub> ( $z \leq x + y \leq 3$ ) clusters $\Delta G$ (kcal·mol <sup>-1</sup> ) at pressure of 1 atm and temperatures of 298.15, 278.15, 258.15, 238.15 and 218.15 K                                                                                                              |
| S44-S45 | <b>Table S7</b> Evaporation rates $\gamma$ (s <sup>-1</sup> ) for the studied clusters at different temperatures of 298.15, 278.15, 258.15, 238.15 and 218.15 K                                                                                                                                                                                                                              |
| S46-S47 | <b>Table S8</b> Collision coefficients ( $\beta$ , cm <sup>3</sup> ·s <sup>-1</sup> ) for each cluster in the present study                                                                                                                                                                                                                                                                  |
| S48     | <b>Table S9</b> Total evaporation coefficients ( $\sum \gamma$ , s <sup>-1</sup> ) for each cluster in the present study                                                                                                                                                                                                                                                                     |
| S49-S50 | <b>Table S10</b> Ratios ( $\beta \cdot C / \sum \gamma$ ) between monomer molecule collisions and evaporation coefficients for each cluster involving SFA in the present study ([MSA] = 1.0 × 10 <sup>7</sup> molecules·cm <sup>-3</sup> , [MA] = 2.5 × 10 <sup>7</sup> molecules·cm <sup>-3</sup> , [SFA] = 1.0 × 10 <sup>7</sup> molecules·cm <sup>-3</sup> )                              |
| S51     | <b>Table S11</b> The formation rate $J$ of MSA at the conditions of $T = 238.15$ K, [MSA] = 10 <sup>6</sup> -10 <sup>8</sup> molecules·cm <sup>-3</sup> , [MA] = 10 <sup>7</sup> -10 <sup>11</sup> molecules·cm <sup>-3</sup> , and [SFA] = 0, 10 <sup>8</sup> -10 <sup>12</sup> molecules·cm <sup>-3</sup> . MSA, MA and SFA represent sulfuric acid, ammonia and formic acid, respectively |
| S52     | <b>Table S12</b> The formation rate $J$ of MSA at the conditions of $T = 258.15$ K, [MSA] = 10 <sup>6</sup> -10 <sup>8</sup> molecules·cm <sup>-3</sup> , [MA] = 10 <sup>7</sup> -10 <sup>11</sup> molecules·cm <sup>-3</sup> , and [SFA] = 0, 10 <sup>8</sup> -10 <sup>12</sup> molecules·cm <sup>-3</sup> . MSA, MA and SFA represent sulfuric acid, ammonia and formic acid, respectively |
| S53     | <b>Table S13</b> The formation rate $J$ of MSA at the conditions of $T = 278.15$ K, [MSA] = 10 <sup>6</sup> -10 <sup>8</sup> molecules·cm <sup>-3</sup> , [MA] = 10 <sup>7</sup> -10 <sup>11</sup> molecules·cm <sup>-3</sup> , and [SFA] = 0, 10 <sup>8</sup> -10 <sup>12</sup> molecules·cm <sup>-3</sup> . MSA, MA and SFA represent sulfuric acid, ammonia and formic acid, respectively |
| S54     | <b>Table S14</b> The formation rate $J$ of MSA at the conditions of $T = 298.15$ K, [MSA] = 10 <sup>6</sup> -10 <sup>8</sup> molecules·cm <sup>-3</sup> , [MA] = 10 <sup>7</sup> -10 <sup>11</sup> molecules·cm <sup>-3</sup> , and [SFA] = 0, 10 <sup>8</sup> -10 <sup>12</sup> molecules·cm <sup>-3</sup> . MSA, MA and SFA represent sulfuric acid, ammonia and formic acid, respectively |
| S55-S76 | <b>Table S15</b> Cartesian coordinates of all molecules and clusters in the studied system                                                                                                                                                                                                                                                                                                   |

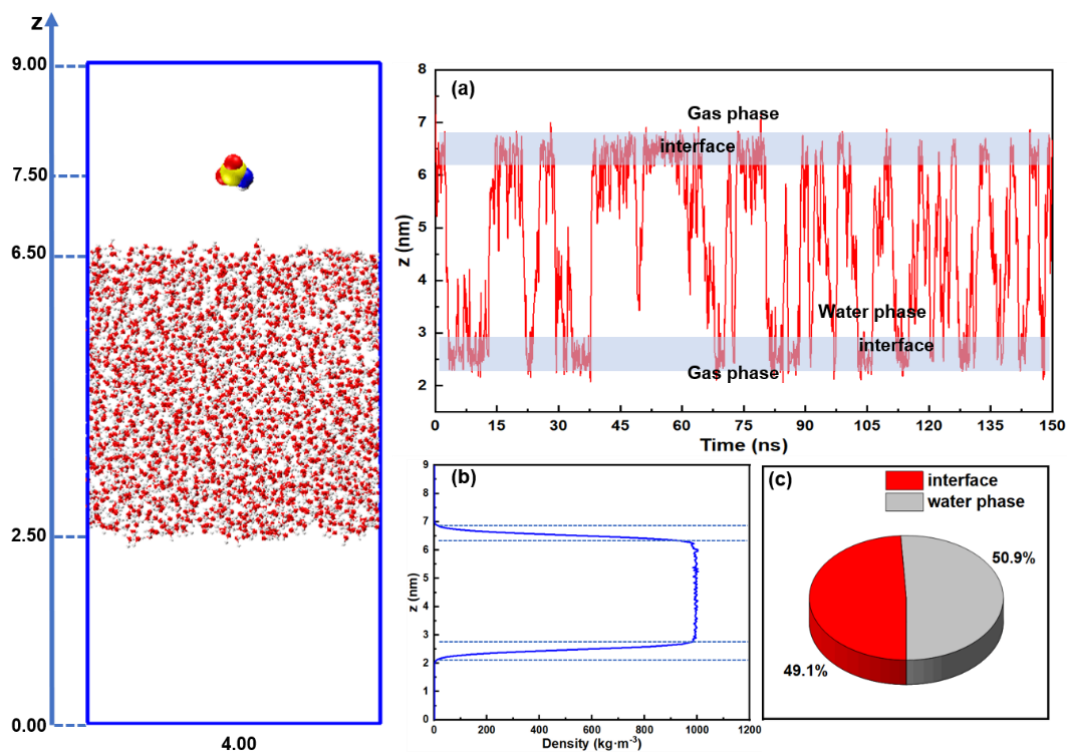

**Fig. S1** (a) The  $z$  coordinates of HNSO<sub>2</sub> molecule as the function of simulation time; (b) the density profile of water; (c) the pie chart with the occurrence percentages of HNSO<sub>2</sub> molecule at the air-water interface and in water phase



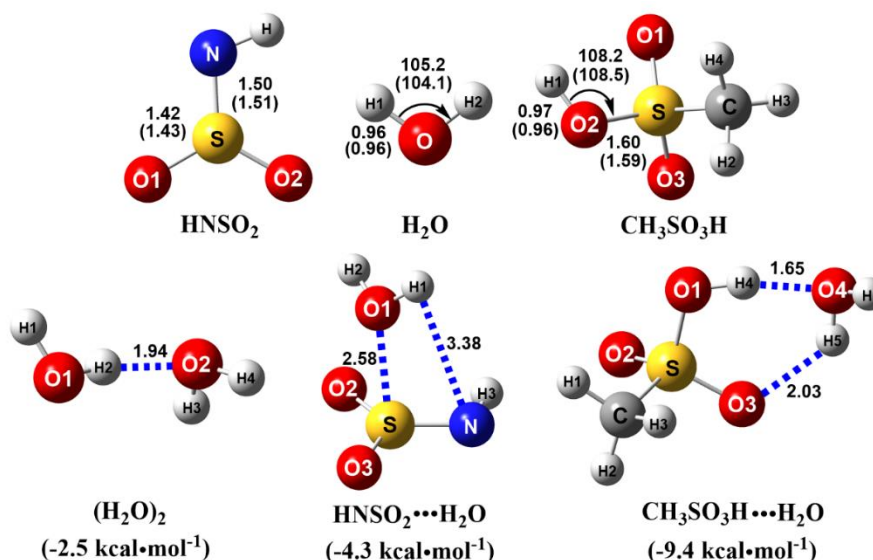

**Fig. S2** Optimized geometries of  $\text{HNSO}_2$ ,  $\text{H}_2\text{O}$ ,  $\text{CH}_3\text{SO}_3\text{H}$ ,  $(\text{H}_2\text{O})_2$ ,  $\text{HNSO}_2 \cdots \text{H}_2\text{O}$  and  $\text{CH}_3\text{SO}_3\text{H} \cdots \text{H}_2\text{O}$  at the M06-2X/6-311++G(2df,2pd) level (bond distances in Angstroms and angles in degrees) along with the stabilization energies of  $(\text{H}_2\text{O})_2$ ,  $\text{HNSO}_2 \cdots \text{H}_2\text{O}$  and  $\text{CH}_3\text{SO}_3\text{H} \cdots \text{H}_2\text{O}$  at the CCSD(T)-F12/cc-pVDZ-F12//M06-2X/6-311++G(2df,2pd) level of theory

Fig. S2 illustrated the optimized geometries of monomer reactants of  $\text{HNSO}_2$ ,  $\text{H}_2\text{O}$  and  $\text{CH}_3\text{SO}_3\text{H}$ , which were consistent with the available experimental bond lengths (Å) and bond angles. The mean absolute deviation of bond lengths (Å) and bond angles ( $^\circ$ ) between the calculations at the M06-2X/6-311++G(2df,2pd) level and the experimental values<sup>1, 2, 3</sup> were less than 0.01 Å and  $1.1^\circ$ , respectively. As for the dimer reactant of  $(\text{H}_2\text{O})_2$ , single hydrogen bond geometry has been obtained, which was in good agreement with the previous reports<sup>4, 5</sup>  $\text{HNSO}_2 \cdots \text{H}_2\text{O}$  and  $\text{CH}_3\text{SO}_3\text{H} \cdots \text{H}_2\text{O}$  displayed cage-like structures, and these geometrical structures were in good agreement with earlier findings<sup>6</sup>. The stabilization energies of  $(\text{H}_2\text{O})_2$ ,  $\text{CH}_3\text{SO}_3\text{H} \cdots \text{H}_2\text{O}$  with respect to the isolated reactants were in the range of -2.5 to -9.4 kcal·mol<sup>-1</sup>, and these energy values matched well with the earlier findings<sup>7</sup>.

- Méndez, M., Francisco, J. S., and Dixon, D. A.: Thermodynamic properties of the isomers of [HNOS], [HNO<sub>2</sub>S], and [HNOS<sub>2</sub>] and the role of the central sulfur, *Chem. Eur. J.*, 20, 10231-10235, 2014
- Mallick, S., Sarkar, S., Bandyopadhyay, B., and Kumar, P.: Effect of ammonia and formic acid on the OH• + HCl reaction in the troposphere: competition between single and double hydrogen atom transfer pathways, *J. Phys. Chem. A*, 122, 350-363, 2018.
- Ning, A., Liu, L., Ji, L., and Zhang, X.: Molecular-level nucleation mechanism of iodic acid and methanesulfonic acid, *Atmospheric Chem. Phys.*, 22, 6103-6114, 2022.
- Sarkar, S., Mallick, S., Kumar, P., and Bandyopadhyay, B.: Isomerization of methoxy radical in the troposphere: Competition between acidic, neutral and basic catalysts, *Phys. Chem. Chem. Phys.*, 19, 27848-27858, 2017.
- Zhang, T., Zhang, Y., Tian, S., Zhou, M., Liu, D., Lin, L., Zhang, Q., Wang, R., and Muthiah, B.: Possible atmospheric source of NH<sub>2</sub>SO<sub>3</sub>H: the hydrolysis of HNSO<sub>2</sub> in the presence of neutral, basic, and acidic catalysts,

- 45 Phys. Chem. Chem. Phys., 24, 4966-4977, 2022.
- 46 6. Manonmani, G., Sandhiya, L., and Senthilkumar, K.: Hydrolysis of HNSO<sub>2</sub>: A potential route for atmospheric
- 47 production of H<sub>2</sub>SO<sub>4</sub> and NH<sub>3</sub>, Int. J. Quantum Chem, 120, e26182, 2020.
- 48 7. Bandyopadhyay, B., Kumar, P., and Biswas, P.: Ammonia catalyzed formation of sulfuric acid in
- 49 troposphere: the curious case of a base promoting acid rain, J. Phys. Chem. A, 121, 3101-3108, 2017.

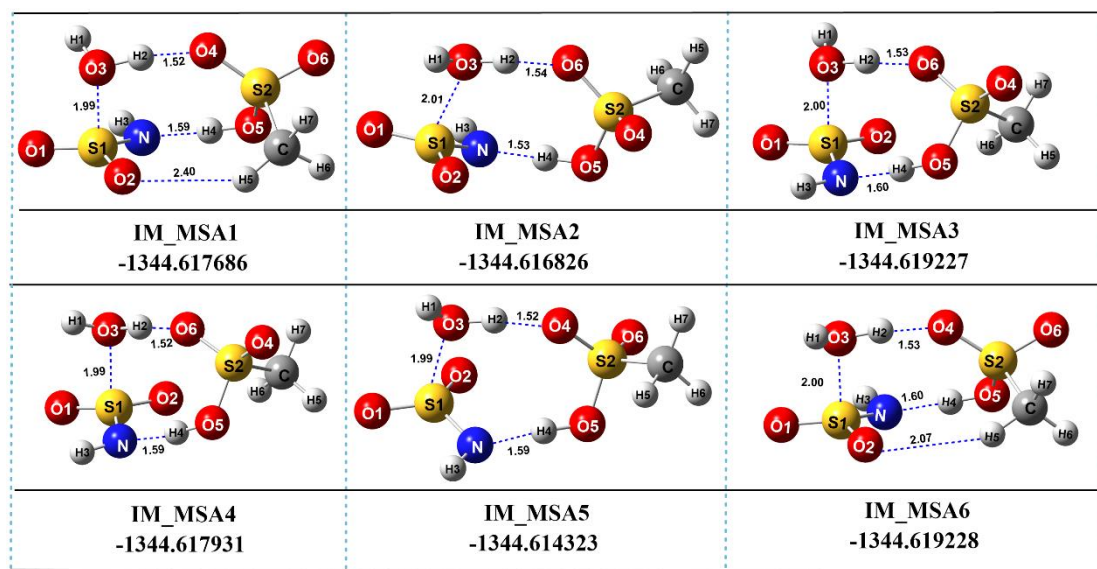

**Fig. S3** The optimized geometries and electric energies (in Hartree-Fock) for the complexes of  $\text{HNSO}_2 \cdots \text{H}_2\text{O} \cdots \text{CH}_3\text{SO}_3\text{H}$  at the M06-2X/6-311++G(2df,2pd) level of theory

To obtain the most stable configurations of  $\text{HNSO}_2 \cdots \text{H}_2\text{O} \cdots \text{CH}_3\text{SO}_3\text{H}$ , 500 auto-generated structures were produced by ABCcluster<sup>1,2</sup> software with TIP4P model<sup>3,4</sup> for  $\text{H}_2\text{O}$  and CHARMM force field<sup>5</sup> for  $\text{HNSO}_2$  and  $\text{CH}_3\text{SO}_3\text{H}$ . The generated structures were firstly optimized at the semi-empirical PM7 level by using MOPAC 2016<sup>6,7</sup>. Then, only structures with the following characteristics were selected and were optimized at the M06-2X/6-311++G(*d,p*) level: (i) the structures contains the  $\text{S}(\text{HNSO}_2) \cdots \text{O}(\text{H}_2\text{O})$  interaction of electron donor-acceptor (EDA); (ii) the structures facilitate the transfer of hydrogen atom from  $\text{H}_2\text{O}$  to  $\text{HNSO}_2$ . Subsequently, more than 50 isomers with an order of electronic energies were selected for geometry optimization by a relatively high level of M06-2X/6-311G(2*d*,2*p*). Finally, the global minimum isomers within 6.0 kcal·mol<sup>-1</sup> were re-optimized by the M06-2X/6-311++G(2*df*,2*pd*) level. As for the reactant complex  $\text{HNSO}_2 \cdots \text{H}_2\text{O} \cdots \text{CH}_3\text{SO}_3\text{H}$  its optimized geometries and stabilization energies have been illustrated in Fig. S2. As seen in Fig. S2, seven geometric isomers of  $\text{HNSO}_2 \cdots \text{H}_2\text{O} \cdots \text{CH}_3\text{SO}_3\text{H}$  (labeled as IM\_MSA*n*, *n* = 1-6) have been optimized at the M06-2X/6-311++G(2*df*,2*pd*) level, where complex IM\_MSA1 is the most favorable complex with its binding energy larger by 0.8-3.1 kcal·mol<sup>-1</sup> than the other isomers. Based on the stable complex IM\_MSA1, Fig. 1 shows the favorable PES profile for the the hydrolysis reaction of  $\text{HNSO}_2$  with  $\text{CH}_3\text{SO}_3\text{H}$ .

1. Zhang, J. and Dolg, M.: AB Cluster: the artificial bee colony algorithm for cluster global optimization, Phys. Chem. Chem. Phys., 17, 24173-24181, 2015.
2. Zhang, J. and Dolg, M.: Global optimization of clusters of rigid molecules using the artificial bee colony

- algorithm, *Phys. Chem. Chem. Phys.*, 18, 3003-3010, 2016.
3. Jorgensen, W. L., Chandrasekhar, J., Madura, J. D., Impey, R. W., and Klein, M. L.: Comparison of simple potential functions for simulating liquid water, *J. Chem. Phys.*, 79, 1983.
4. Wales, D. J. and Hodges, M. P.: Global minima of water clusters (H<sub>2</sub>O)<sub>n</sub>,  $n \leq 21$ , described by an empirical potential, *Chem. Phys. Lett.*, 286, 65-72, 1998.
5. MacKerell, A. D., Bashford, D., Bellott, M., Dunbrack, R. L., Evanseck, J. D., Field, M. J., Fischer, S., Gao, J., Guo, H., Ha, S., Joseph-McCarthy, D., Kuchnir, L., Kuczera, K., Lau, F. T. K., Mattos, C., Michnick, S., Ngo, T., Nguyen, D. T., Prodhom, B., Reiher, W. E., Roux, B., Schlenkrich, M., Smith, J. C., Stote, R., Straub, J., Watanabe, M., Wiórkiewicz-Kuczera, J., Yin, D., and Karplus, M.: All-atom empirical potential for molecular modeling and dynamics studies of proteins, *J. Phys. Chem. B*, 102, 3586-3616, 1998.
6. Rozanska, X., Stewart, J. J. P., Ungerer, P., Leblanc, B., Freeman, C., Saxe, P., and Wimmer, E.: High-throughput calculations of molecular properties in the medea environment: accuracy of PM7 in predicting vibrational frequencies, ideal gas entropies, heat capacities, and gibbs free energies of organic molecules, *J. Chem. Eng. Data*, 59, 3136-3143, 2014.
7. Stewart, J. J. P.: Optimization of parameters for semiempirical methods VI: more modifications to the NDDO approximations and re-optimization of parameters, *J. Mol. Model.*, 19, 1-32, 2013.

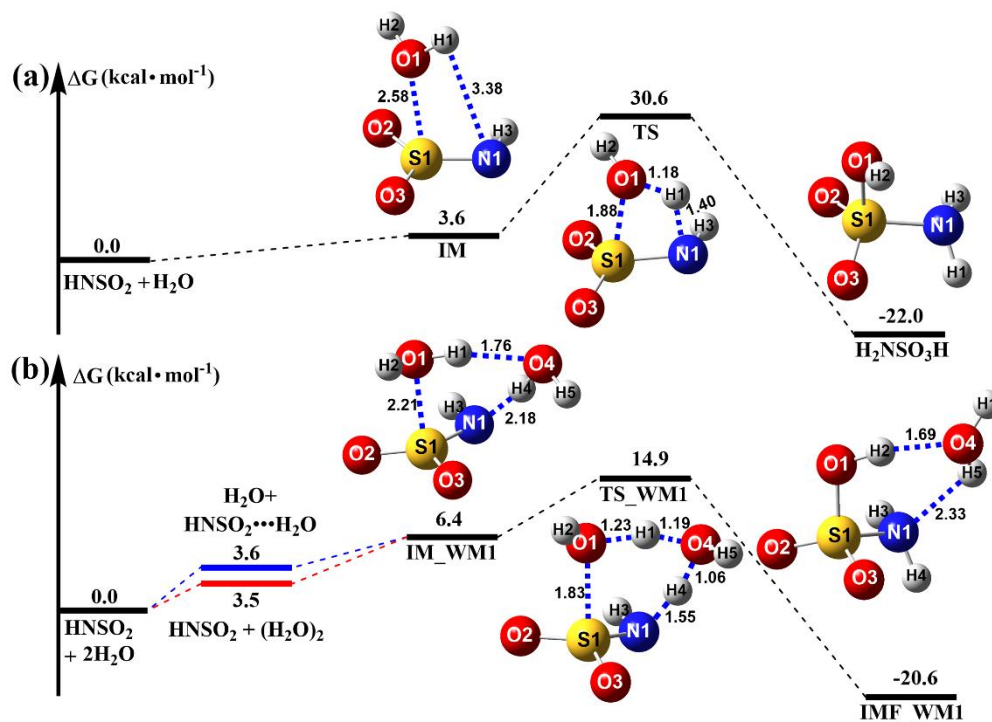

**Fig. S4** The potential energy profile ( $\Delta G$ ) for the hydrolysis reaction of  $\text{HNSO}_2$  without (a) and with (b)  $\text{H}_2\text{O}$  at the CCSD(T)-F12/cc-pVDZ-F12//M06-2X/6-311++G(2df,2pd) level of theory

92 **Table S1** Zero point energy (ZPE/(kcal·mol<sup>-1</sup>)), entropies (S/(cal·mol<sup>-1</sup>·K<sup>-1</sup>)), relative energies ( $\Delta E$   
93 and  $\Delta(E + \text{ZPE})$ /(kcal·mol<sup>-1</sup>)), enthalpies ( $\Delta H(298)$ /(kcal·mol<sup>-1</sup>)), and free energies  
94 ( $\Delta G(298)$ /(kcal·mol<sup>-1</sup>)) for the hydrolysis reaction of HNSO<sub>2</sub> without and with H<sub>2</sub>O and CH<sub>3</sub>SO<sub>3</sub>H

| <i>Species</i>                                                            | ZPE  | $\Delta E$                    | S     | $\Delta G$ | $\Delta(E + \text{ZPE})$ | $\Delta H$ |
|---------------------------------------------------------------------------|------|-------------------------------|-------|------------|--------------------------|------------|
| HNSO <sub>2</sub> + H <sub>2</sub> O                                      | 28.7 | 0.0                           | 110.6 | 0.0        | 0.0                      | 0.0        |
| IM                                                                        | 30.3 | -6.0                          | 83.2  | 3.6        | -4.4                     | -4.5       |
| TS                                                                        | 29.2 | 20.2                          | 71.9  | 30.6       | 20.6                     | 19.1       |
| IMF                                                                       | 32.8 | -35.9                         | 73.2  | -22.0      | -31.8                    | -33.2      |
| HNSO <sub>2</sub> + 2H <sub>2</sub> O                                     | 42.3 | 0.0                           | 155.7 | 0.0        | 0.0                      | 0.0        |
| HNSO <sub>2</sub> + (H <sub>2</sub> O) <sub>2</sub>                       | 44.8 | -5.0                          | 133.2 | 3.5        | -2.5                     | -3.2       |
| HNSO <sub>2</sub> ···H <sub>2</sub> O + H <sub>2</sub> O                  | 43.9 | -6.0                          | 128.3 | 3.6        | -4.4                     | -4.5       |
| IM_WM1                                                                    | 47.5 | -17.1<br>(-20.3) <sup>a</sup> | 89.1  | 6.4        | -11.9                    | -13.5      |
| TS_WM1                                                                    | 45.8 | -8.2<br>(-12.1) <sup>a</sup>  | 79.8  | 14.9       | -4.7                     | -7.7       |
| IMF_WM1                                                                   | 48.7 | -45.4<br>(-42.9) <sup>a</sup> | 87.1  | -20.6      | -39.0                    | -41.0      |
| HNSO <sub>2</sub> + H <sub>2</sub> O + CH <sub>3</sub> SO <sub>3</sub> H  | 68.2 | 0.0                           | 185.4 | 0.0        | 0.0                      | 0.0        |
| HNSO <sub>2</sub> + CH <sub>3</sub> SO <sub>3</sub> H···H <sub>2</sub> O  | 70.5 | -11.7                         | 154.1 | -0.9       | -9.4                     | -10.2      |
| HNSO <sub>2</sub> ···H <sub>2</sub> O + CH <sub>3</sub> SO <sub>3</sub> H | 69.7 | -6.0                          | 158.0 | 3.6        | -4.4                     | -4.5       |
| IM_MSA1                                                                   | 72.4 | -25.2                         | 107.3 | 0.8        | -21.0                    | -22.5      |
| TS_MSA1                                                                   | 70.1 | -22.9                         | 102.6 | 1.6        | -20.9                    | -23.1      |
| IMF_MSA1                                                                  | 73.5 | -49.3                         | 109.5 | -22.6      | -44.0                    | -45.3      |

95 <sup>a</sup> The value was taken from reference (Manonmani, G., Sandhiya, L., and Senthilkumar, K.: Hydrolysis of HNSO<sub>2</sub>:  
96 A potential route for atmospheric production of H<sub>2</sub>SO<sub>4</sub> and NH<sub>3</sub>, Int J Quantum Chem, 120, e26182, 2020.)

**Table S2** Equilibrium constants ( $\text{cm}^3 \cdot \text{molecule}^{-1}$ ) for the  $\text{HNSO}_2 \cdots \text{H}_2\text{O}$ ,  $\text{H}_2\text{O} \cdots \text{H}_2\text{O}$ , and  $\text{CH}_3\text{SO}_3\text{H} \cdots \text{H}_2\text{O}$  complexes within the temperature range of 212.6-320.0 K

| $T/\text{K}$ | $\text{HNSO}_2 \cdots \text{H}_2\text{O}$ | $\text{H}_2\text{O} \cdots \text{H}_2\text{O}$                    | $\text{CH}_3\text{SO}_3\text{H} \cdots \text{H}_2\text{O}$ |
|--------------|-------------------------------------------|-------------------------------------------------------------------|------------------------------------------------------------|
| 212.6        | $7.34 \times 10^{-21}$                    | $7.04 \times 10^{-22}$                                            | $3.71 \times 10^{-16}$                                     |
| 229.7        | $3.55 \times 10^{-21}$                    | $4.32 \times 10^{-22}$                                            | $6.80 \times 10^{-17}$                                     |
| 259.3        | $1.32 \times 10^{-21}$                    | $2.22 \times 10^{-22}$                                            | $5.90 \times 10^{-18}$                                     |
| 280.0        | $7.43 \times 10^{-22}$                    | $1.51 \times 10^{-22}$                                            | $1.56 \times 10^{-18}$                                     |
| 290.0        | $5.85 \times 10^{-22}$                    | $1.29 \times 10^{-22}$                                            | $8.61 \times 10^{-19}$                                     |
| 298.15       | $4.90 \times 10^{-22}$                    | $1.14 \times 10^{-22}$<br>( $2.34 \times 10^{-21}$ ) <sup>a</sup> | $5.52 \times 10^{-19}$                                     |
| 300.0        | $4.70 \times 10^{-22}$                    | $1.11 \times 10^{-22}$                                            | $4.95 \times 10^{-19}$                                     |
| 310.0        | $3.84 \times 10^{-22}$                    | $9.69 \times 10^{-23}$                                            | $2.96 \times 10^{-19}$                                     |
| 320.0        | $3.18 \times 10^{-22}$                    | $8.56 \times 10^{-23}$                                            | $1.83 \times 10^{-19}$                                     |

<sup>a</sup> The value was taken from reference (Torrent-Sucarrat, M., Francisco, J. S., and Anglada, J. M.: Sulfuric acid as autocatalyst in the formation of sulfuric acid, J. Am. Chem. Soc., 134, 20632-20644, 2012.)

**Table S3** The high-pressure limiting rate constant ( $\text{cm}^3 \cdot \text{molecule}^{-1} \cdot \text{s}^{-1}$ ) for the hydrolysis reaction of  $\text{HNSO}_2$  with  $\text{H}_2\text{O}$  and  $\text{CH}_3\text{SO}_3\text{H}$  within the temperature range of 212.6-320.0 K

| $T(\text{K})$ | $\text{HNSO}_2 + \text{H}_2\text{O}$<br>$\rightarrow \text{HNSO}_2 \cdots \text{H}_2\text{O}$ | $\text{HNSO}_2 + \text{H}_2\text{O} \cdots \text{H}_2\text{O}$<br>$\rightarrow \text{HNSO}_2 \cdots \text{H}_2\text{O} \cdots \text{H}_2\text{O}$ | $\text{HNSO}_2 + \text{CH}_3\text{SO}_3\text{H} \cdots \text{H}_2\text{O}$<br>$\rightarrow \text{HNSO}_2 \cdots \text{CH}_3\text{SO}_3\text{H} \cdots \text{H}_2\text{O}$ |
|---------------|-----------------------------------------------------------------------------------------------|---------------------------------------------------------------------------------------------------------------------------------------------------|---------------------------------------------------------------------------------------------------------------------------------------------------------------------------|
| 212.6         | $2.06 \times 10^{-10}$                                                                        | $1.96 \times 10^{-10}$                                                                                                                            | $4.04 \times 10^{-11}$                                                                                                                                                    |
| 229.7         | $2.14 \times 10^{-10}$                                                                        | $2.03 \times 10^{-10}$                                                                                                                            | $4.20 \times 10^{-11}$                                                                                                                                                    |
| 259.3         | $2.27 \times 10^{-10}$                                                                        | $2.16 \times 10^{-10}$                                                                                                                            | $4.46 \times 10^{-11}$                                                                                                                                                    |
| 280.0         | $2.36 \times 10^{-10}$                                                                        | $2.24 \times 10^{-10}$                                                                                                                            | $4.63 \times 10^{-11}$                                                                                                                                                    |
| 290.0         | $2.41 \times 10^{-10}$                                                                        | $2.28 \times 10^{-10}$                                                                                                                            | $4.71 \times 10^{-11}$                                                                                                                                                    |
| 298.15        | $2.44 \times 10^{-10}$                                                                        | $2.31 \times 10^{-10}$                                                                                                                            | $4.78 \times 10^{-11}$                                                                                                                                                    |
| 300.0         | $2.45 \times 10^{-10}$                                                                        | $2.32 \times 10^{-10}$                                                                                                                            | $4.79 \times 10^{-11}$                                                                                                                                                    |
| 310.0         | $2.49 \times 10^{-10}$                                                                        | $2.36 \times 10^{-10}$                                                                                                                            | $4.87 \times 10^{-11}$                                                                                                                                                    |
| 320.0         | $2.53 \times 10^{-10}$                                                                        | $2.40 \times 10^{-10}$                                                                                                                            | $4.95 \times 10^{-11}$                                                                                                                                                    |



Part 1. Calculations of reaction rate coefficients

The rate coefficients for the hydrolysis of HNSO<sub>2</sub> with CH<sub>3</sub>SO<sub>3</sub>H were calculated through a two-step process. Initially, the high-pressure-limit (HPL) rate coefficients were computed applying VRC-VTST methods within the Polyrate package<sup>1</sup>. Subsequently, on the basis of the HPL rate coefficients, the rate coefficients for the hydrolysis of HNSO<sub>2</sub> with CH<sub>3</sub>SO<sub>3</sub>H were calculated within the temperature range of 212.6-320.0 K and pressures applying the Master Equation Solver for Multi-Energy Well Reactions (MESMER) program<sup>2</sup>. The rate coefficients for the barrierless steps transitioning between reactants and pre-reactive complexes were assessed applying the Inverse Laplace Transform (ILT) method within MESMER calculations<sup>3</sup>, while the step transitioning between pre-reactive complexes and post-reactive complexes via transition states were evaluated using the RRKM theory<sup>4</sup> in combination with the asymmetric Eckart model.

The ILT methods and RRKM theory can be respectively expressed in Eq. (S1)-Eq. (S2).

$$k(E) = \frac{W(E-E_0)}{h\rho(E)} \quad (\text{S1})$$

$$k^\infty(\beta) = \frac{1}{Q(\beta)} \int_0^\infty k(E)\rho(E)\exp(-\beta E)dE \quad (\text{S2})$$

In Eq (S1) and Eq (S2), the equation  $W(E-E_0)$  represents the rovibrational sum of states (SOS) at the optimized transition state (TS) geometry, where  $E_0$  signifies the reaction threshold energy;  $h$  represents Planck's constant,  $\rho(E)$  denotes the density of rovibrational states of the reactant and  $Q(\beta)$  is the corresponding canonical partition function. Additionally, electronic geometries, vibrational frequencies, and rotational constants were computed at the M06-2X/6-311++G(2df,2pd) level, while single-point energy calculations were refined at the CCSD(T)-F12/cc-pVDZ-F12 level.

1. Chuang, Y., Corchado, J., Fast, P., Villa, J., Coitino, E., Hu, W., Liu, Y., Lynch, G., Nguyen, K., and Jackels, C.: Polyrate-version 8.2, University of Minnesota, Minneapolis, 1999.
2. Glowacki, D. R., Liang, C.-H., Morley, C., Pilling, M. J., and Robertson, S. H.: MESMER: an open-source master equation solver for multi-energy well reactions, *J. Phys. Chem. A*, 116, 9545-9560, 2012.
3. Horváth, G., Horváth, I., Almousa, S. A. D., and Telek, M.: Numerical inverse Laplace transformation using concentrated matrix exponential distributions, *Perform. Evaluation.*, 137, 102067, 2020.
4. Mai, T. V. T., Duong, M. V., Nguyen, H. T., and Huynh, L. K.: Ab initio kinetics of the HOSO<sub>2</sub> + <sup>3</sup>O<sub>2</sub> → SO<sub>3</sub> + HO<sub>2</sub> reaction, *Phys. Chem. Chem. Phys.*, 20, 6677-6687, 2018.

**Table S4** Rate coefficients ( $k$ ,  $\text{cm}^3 \cdot \text{molecule}^{-1} \cdot \text{s}^{-1}$ ) for the hydrolysis of  $\text{HNSO}_2$  by master equation within the temperature range of 212.6-320.0 K

| $T/\text{K}$ | $k_{\text{R}}$         |
|--------------|------------------------|
| 212.6        | $2.55 \times 10^{-28}$ |
| 229.7        | $3.78 \times 10^{-28}$ |
| 259.3        | $1.04 \times 10^{-27}$ |
| 280.0        | $2.70 \times 10^{-27}$ |
| 290.0        | $4.53 \times 10^{-27}$ |
| 298.0        | $7.02 \times 10^{-27}$ |
| 300.0        | $7.86 \times 10^{-27}$ |
| 310.0        | $1.39 \times 10^{-26}$ |
| 320.0        | $2.50 \times 10^{-26}$ |

$k_{\text{R}}$  is the bimolecular rate constant for the hydrolysis of  $\text{HNSO}_2$ .

136 **Table S5** Concentrations (molecules·cm<sup>-3</sup>) of H<sub>2</sub>O and CH<sub>3</sub>SO<sub>3</sub>H within the temperature range of 213-320 K and altitude range of 0-15 km

| Altitude                                              |                     | 0 km                    |                         |                         |                         |                         |                         | 5 km                    | 10 km                   | 15 km                  |
|-------------------------------------------------------|---------------------|-------------------------|-------------------------|-------------------------|-------------------------|-------------------------|-------------------------|-------------------------|-------------------------|------------------------|
| T/K                                                   | RH                  | 280.0                   | 290.0                   | 298.0                   | 300.0                   | 310.0                   | 320.0                   | 259.3                   | 229.7                   | 212.6                  |
| [H <sub>2</sub> O]                                    | 20%RH <sup>a</sup>  | 5.16 × 10 <sup>16</sup> | 9.60 × 10 <sup>16</sup> | 1.50 × 10 <sup>17</sup> | 1.72 × 10 <sup>17</sup> | 2.92 × 10 <sup>17</sup> | 4.70 × 10 <sup>17</sup> |                         |                         |                        |
|                                                       | 40%RH <sup>a</sup>  | 1.03 × 10 <sup>17</sup> | 1.91 × 10 <sup>17</sup> | 3.10 × 10 <sup>17</sup> | 3.43 × 10 <sup>17</sup> | 5.84 × 10 <sup>17</sup> | 9.40 × 10 <sup>17</sup> |                         |                         |                        |
|                                                       | 60%RH <sup>a</sup>  | 1.55 × 10 <sup>17</sup> | 2.87 × 10 <sup>17</sup> | 4.50 × 10 <sup>17</sup> | 5.15 × 10 <sup>17</sup> | 8.77 × 10 <sup>17</sup> | 1.41 × 10 <sup>18</sup> | 2.70 × 10 <sup>12</sup> | 2.30 × 10 <sup>11</sup> | 6.30 × 10 <sup>6</sup> |
|                                                       | 80%RH <sup>a</sup>  | 2.07 × 10 <sup>17</sup> | 3.82 × 10 <sup>17</sup> | 6.20 × 10 <sup>17</sup> | 6.86 × 10 <sup>17</sup> | 1.17 × 10 <sup>18</sup> | 1.88 × 10 <sup>18</sup> |                         |                         |                        |
|                                                       | 100%RH <sup>a</sup> | 2.58 × 10 <sup>17</sup> | 4.78 × 10 <sup>17</sup> | 7.70 × 10 <sup>17</sup> | 8.58 × 10 <sup>17</sup> | 1.46 × 10 <sup>18</sup> | 2.35 × 10 <sup>18</sup> |                         |                         |                        |
| [MSA] <sup>b</sup> = 10 <sup>4</sup> -10 <sup>9</sup> |                     |                         |                         |                         |                         |                         |                         |                         |                         |                        |

137 <sup>a</sup> The value was taken from reference (Anglada, J.M., Hoffman, G.J., Slipchenko, L.V., M. Costa, M., Ruiz-Lopez, M.F., and Francisco, J.S., Atmospheric significance of water clusters and ozone-  
138 water complexes. J. Phys. Chem. A 117, 10381-10396, 2013.)  
139 <sup>b</sup> The value was taken from reference (Shen, J., Elm, J., Xie, H.-B., Chen, J., Niu, J., and Vehkamäki, H.: Structural effects of amines in enhancing methanesulfonic acid-driven new particle  
140 formation, Environ. Sci. Technol., 54, 13498-13508, 2020.)

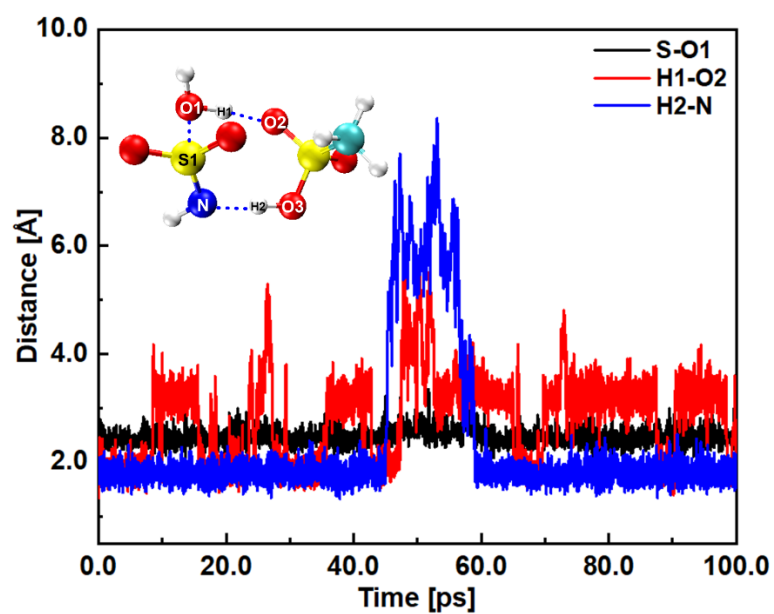

**Fig. S5** The dynamic trajectories of CH<sub>3</sub>SO<sub>3</sub>H-assisted gaseous hydrolysis of HNSO<sub>2</sub>

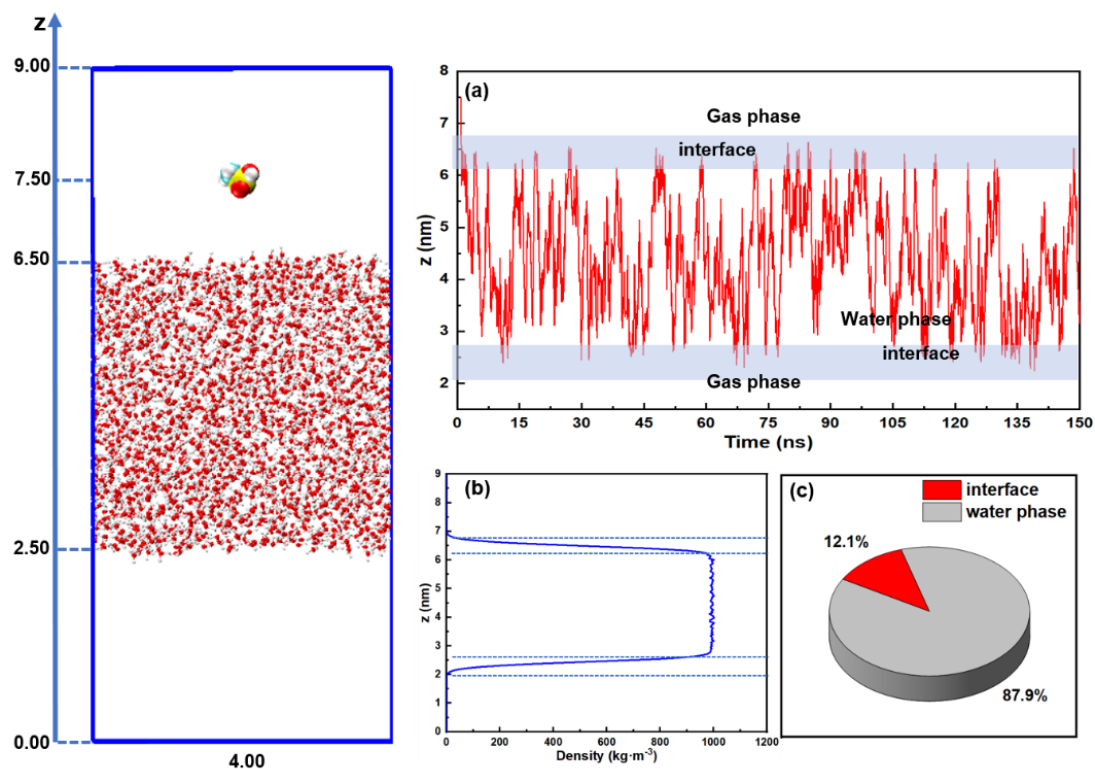

**Fig. S6** (a) The  $z$  coordinates of MSA molecule as the function of simulation time; (b) the density profile of water; (c) the pie chart with the occurrence percentages of MSA molecule at the air-water interface and in water phase

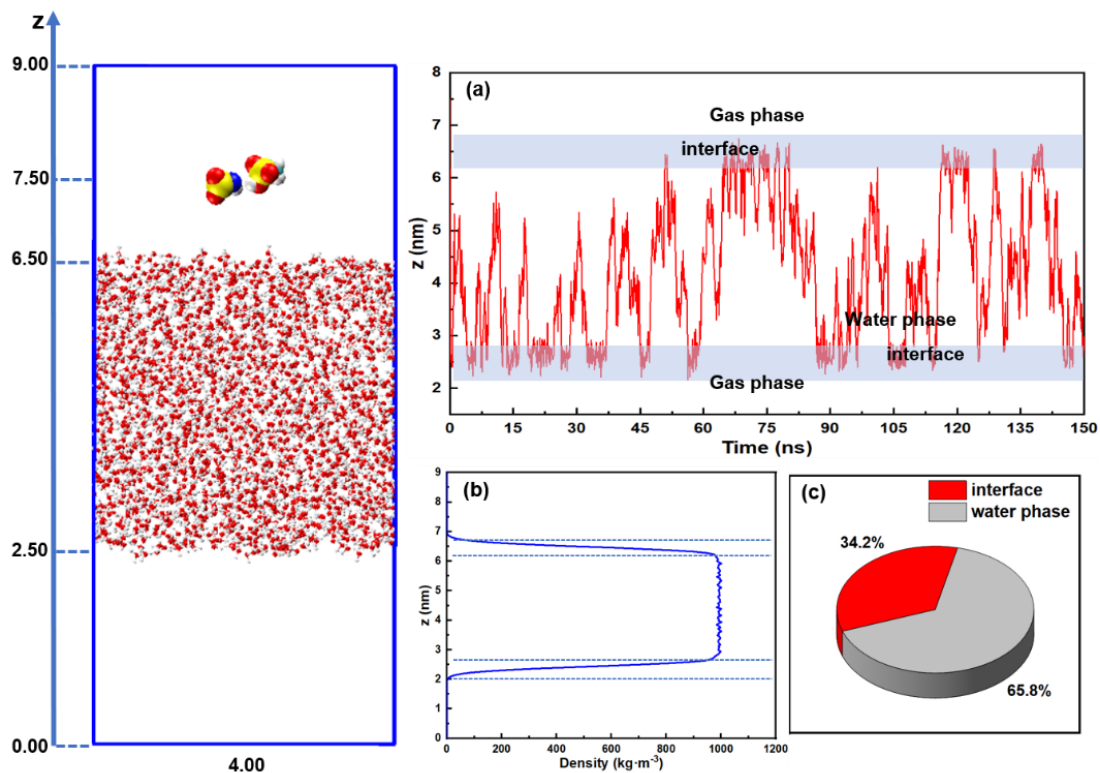

**Fig. S7** (a) The  $z$  coordinates of complex  $\text{HNSO}_2 \cdots \text{CH}_3\text{SO}_3\text{H}$  as the function of simulation time; (b) the density profile of water; (c) the pie chart with the occurrence percentages of complex  $\text{HNSO}_2 \cdots \text{CH}_3\text{SO}_3\text{H}$  at the air-water interface and in water phase

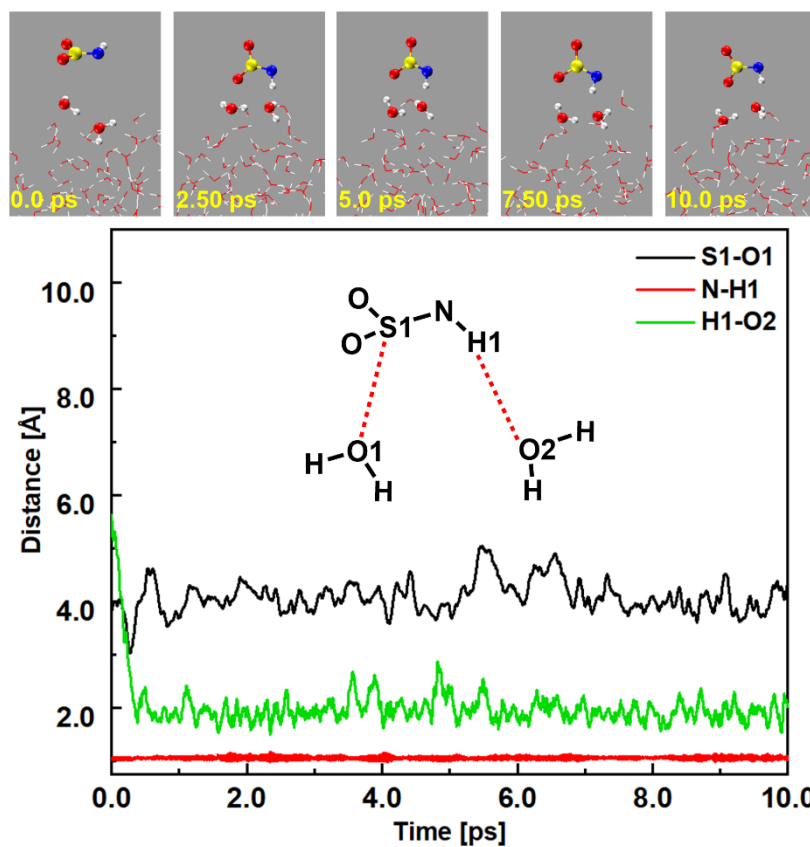

**Fig. S8** Snapshot structures taken from the BOMD simulations of HNSO<sub>2</sub> reaction at the air-water interface

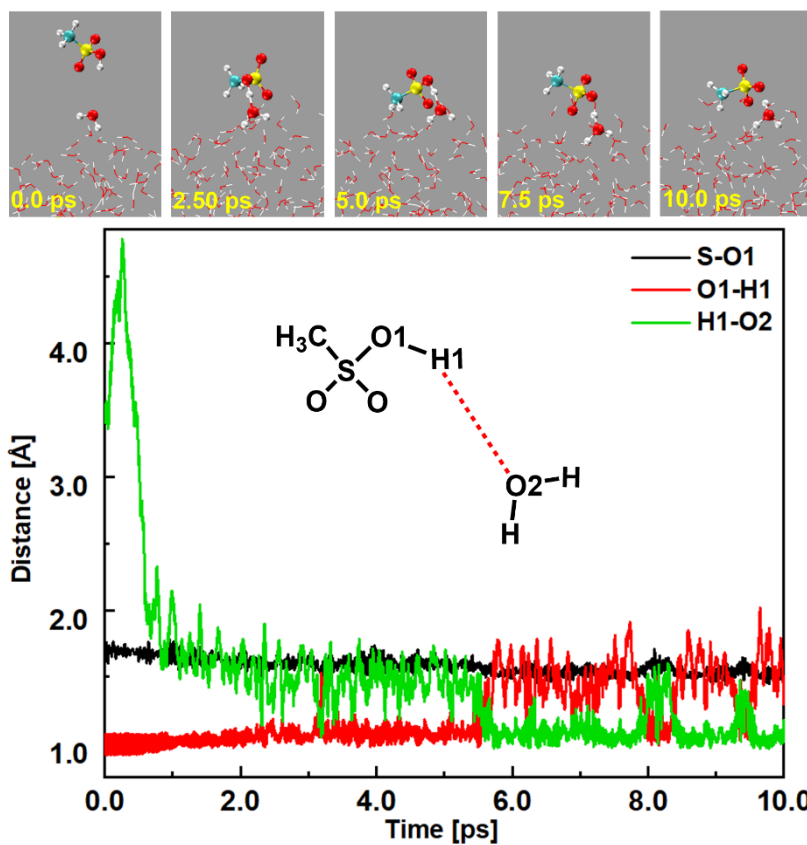

**Fig. S9** Snapshot structures taken from the BOMD simulations of  $\text{CH}_3\text{SO}_3\text{H}$  reaction at the air-water interface



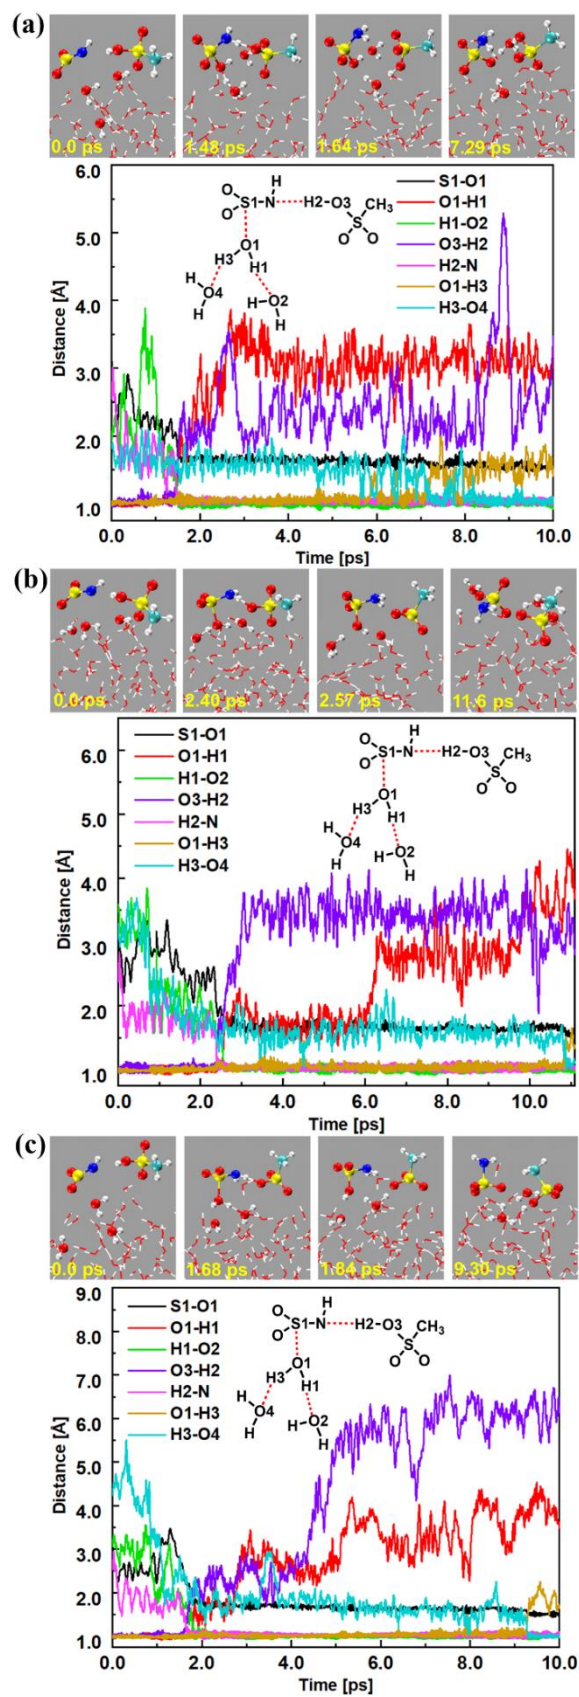

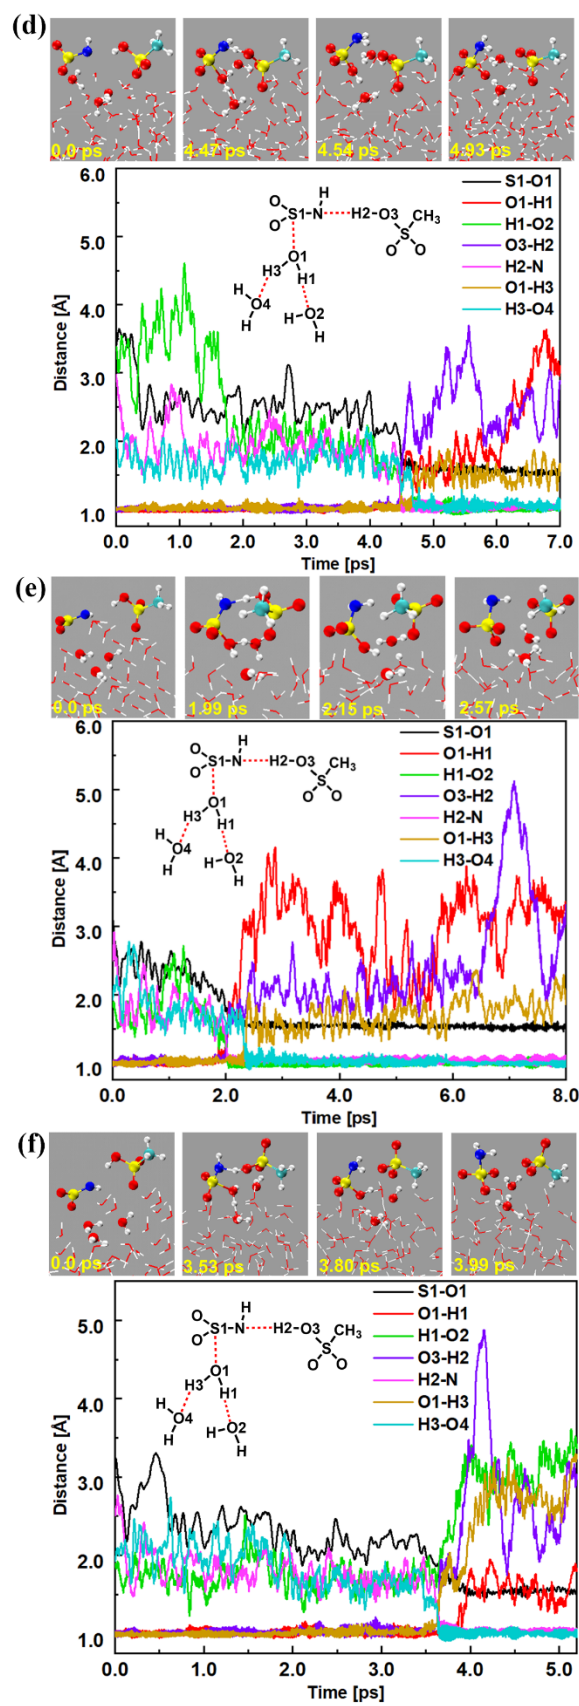

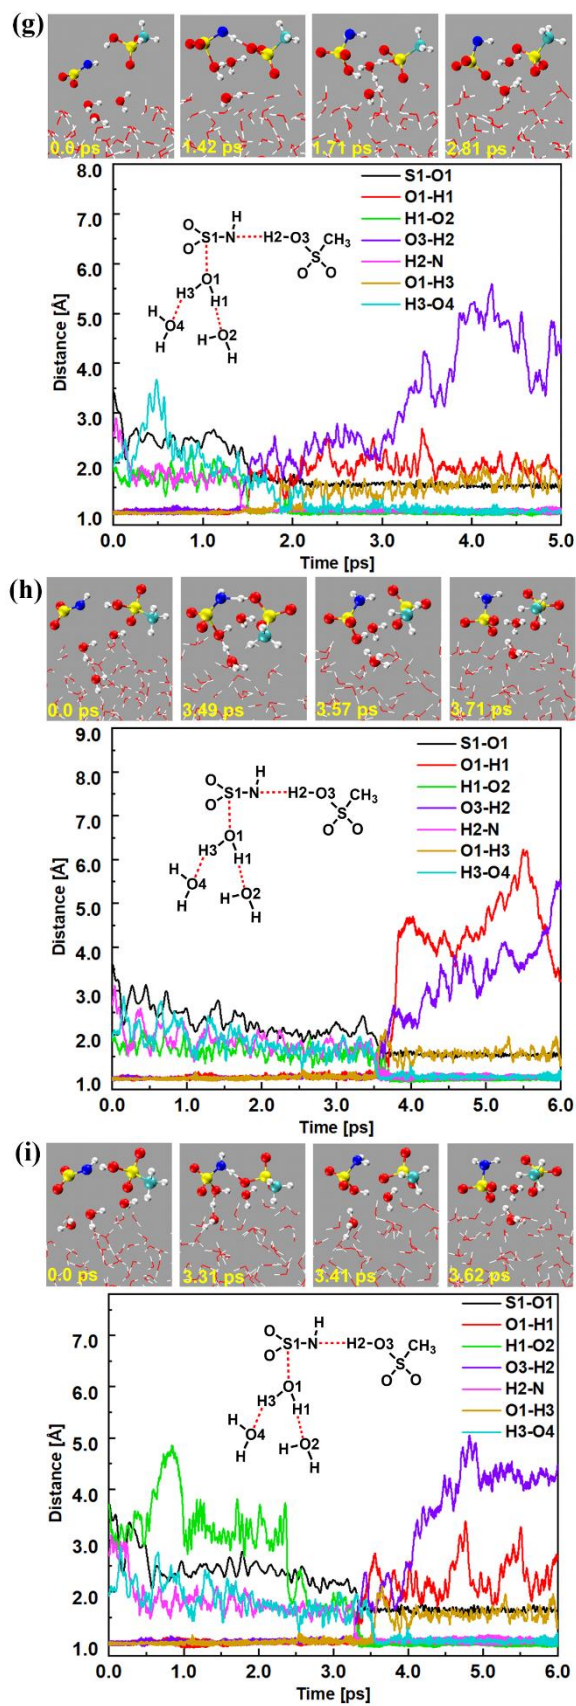

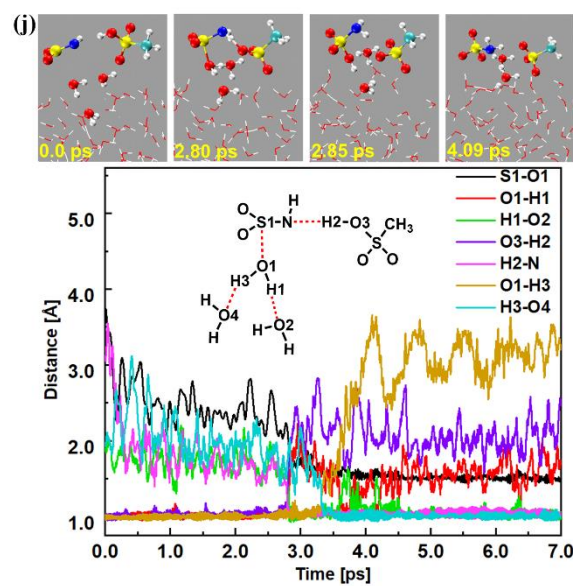

**Fig. S10** BOMD simulation trajectories and snapshots of  $\text{CH}_3\text{SO}_3\text{H}^-$  and  $\text{H}_3\text{O}^+$  ions forming mechanism via the chain structure routes in  $\text{CH}_3\text{SO}_3\text{H}$ -mediated hydration  $\text{HNSO}_2$  at the air-water interface

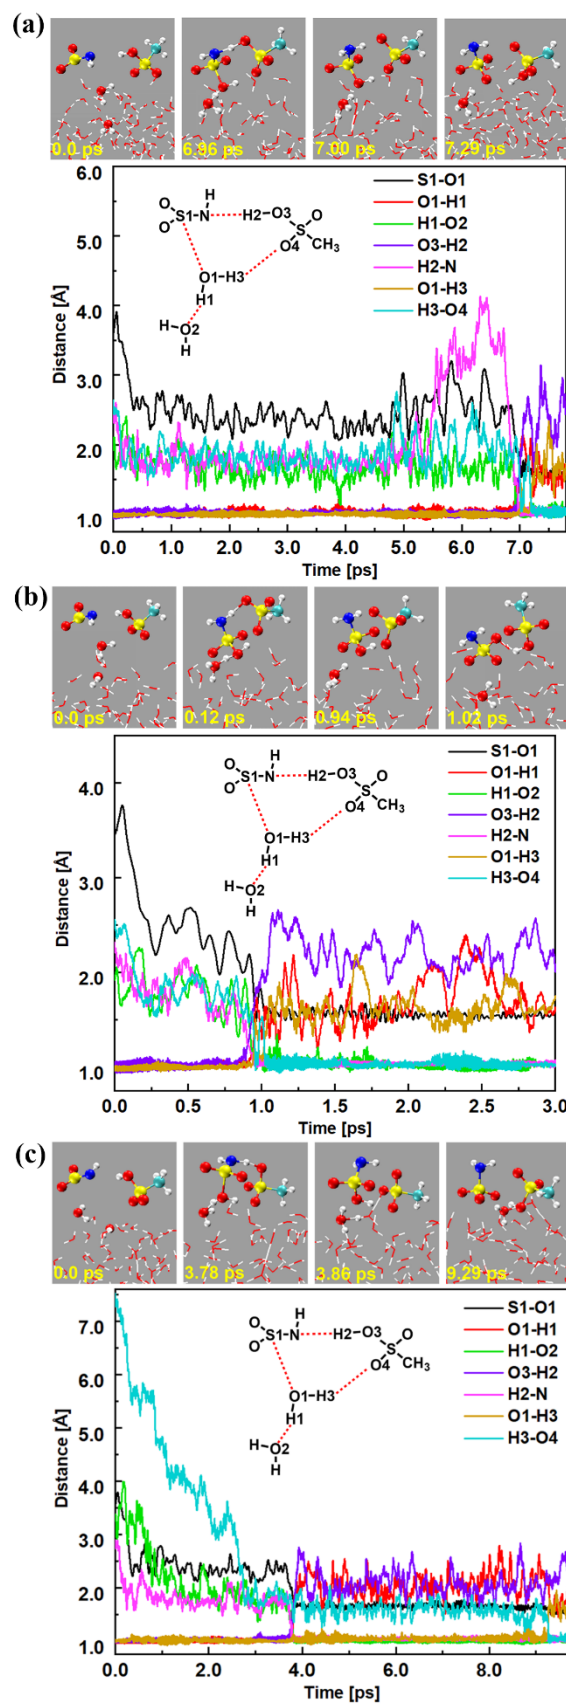



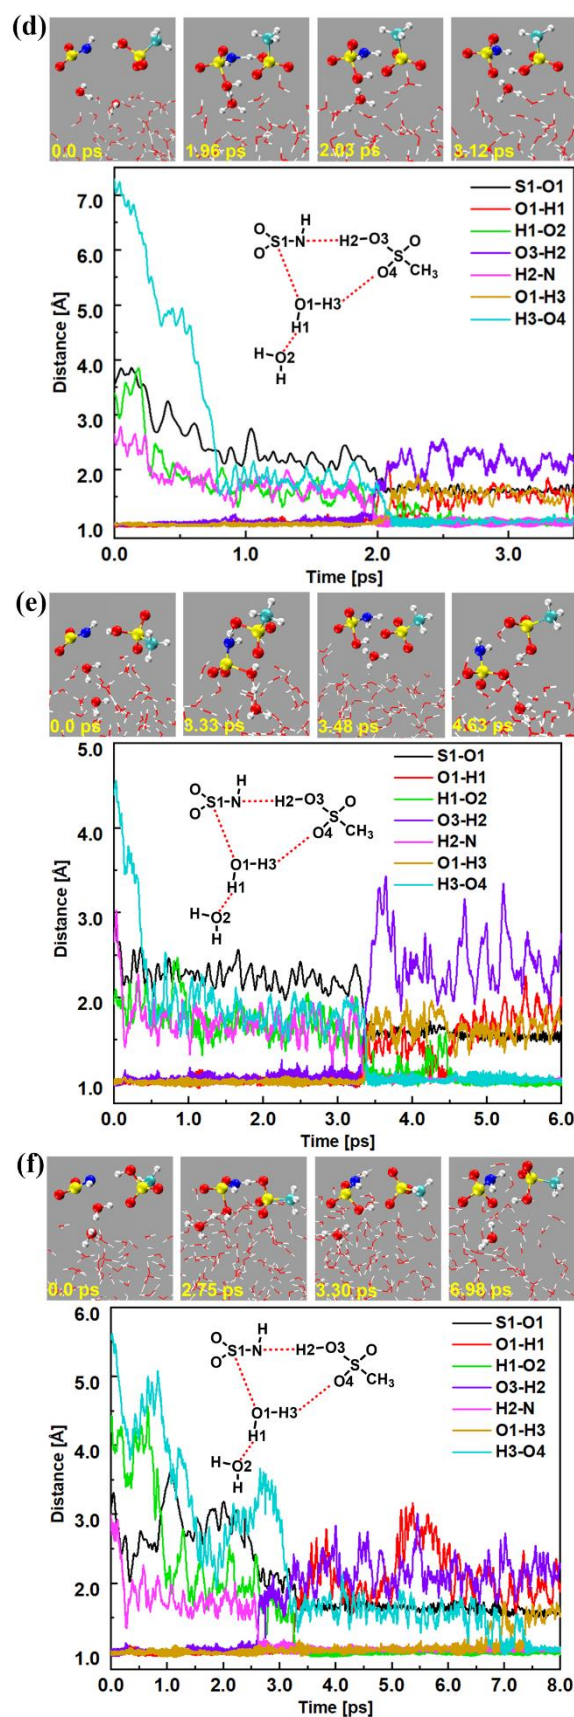

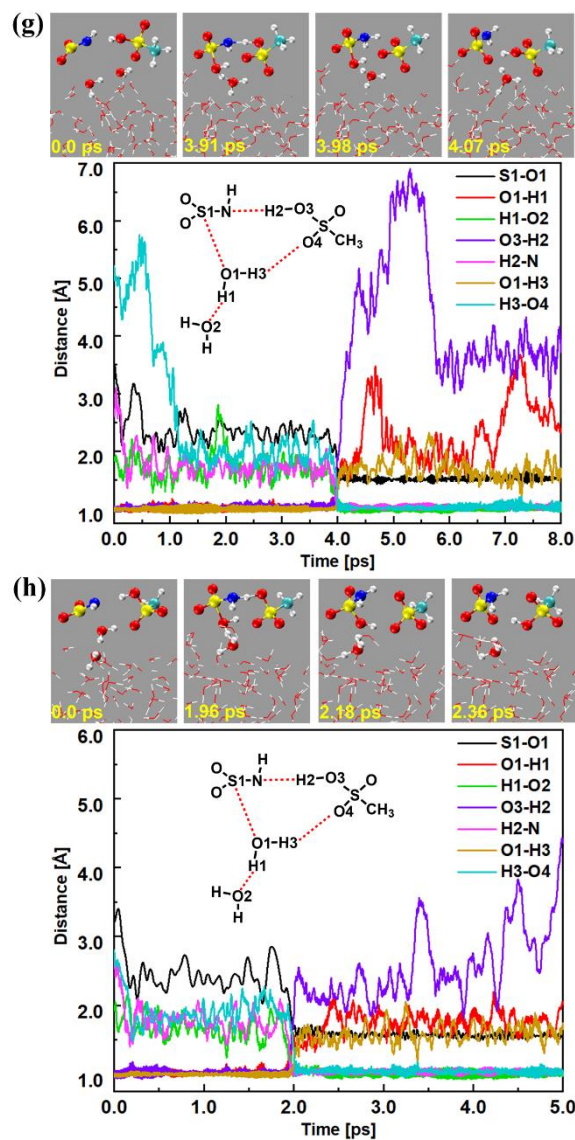

**Fig. S11** BOMD simulation trajectories and snapshots of  $\text{CH}_3\text{SO}_3\text{H}^-$  and  $\text{H}_3\text{O}^+$  ions forming mechanism via loop structure routes in  $\text{CH}_3\text{SO}_3\text{H}$ -mediated hydration  $\text{HNSO}_2$  at the air-water interface

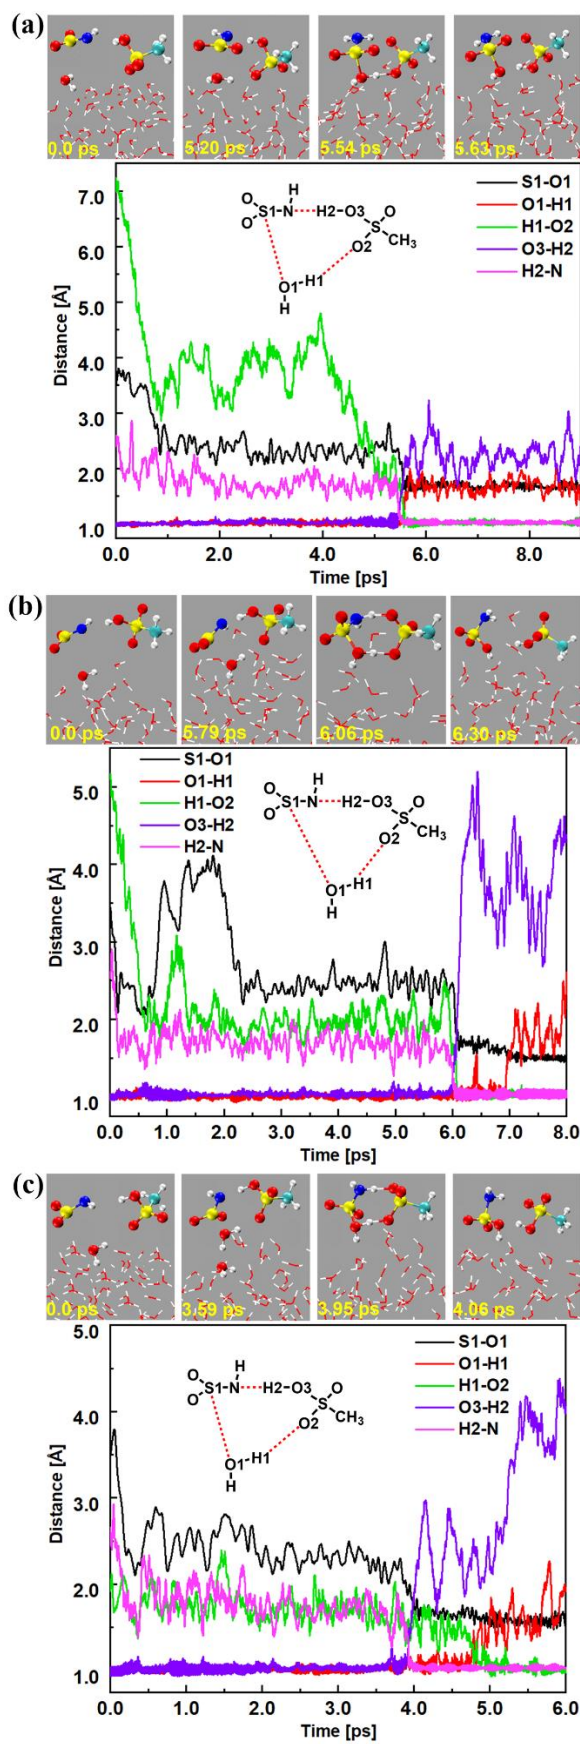



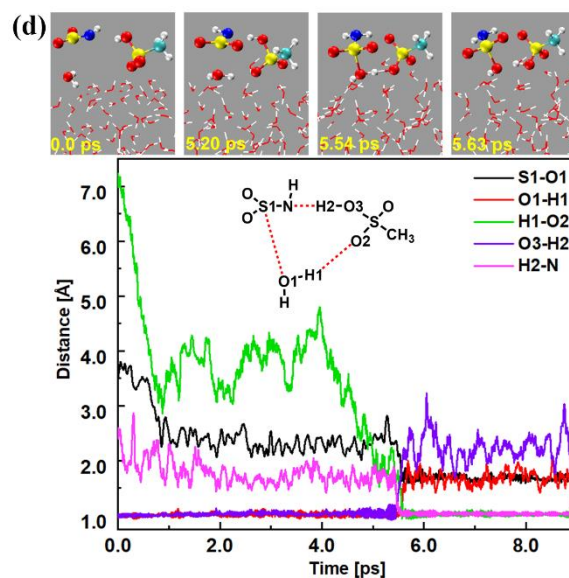

**Fig. S12** BOMD simulation trajectories and snapshots of proton exchange mechanism in  $\text{CH}_3\text{SO}_3\text{H}$ -mediated hydration  $\text{HNSO}_2$  with a water molecule at the air-water interface

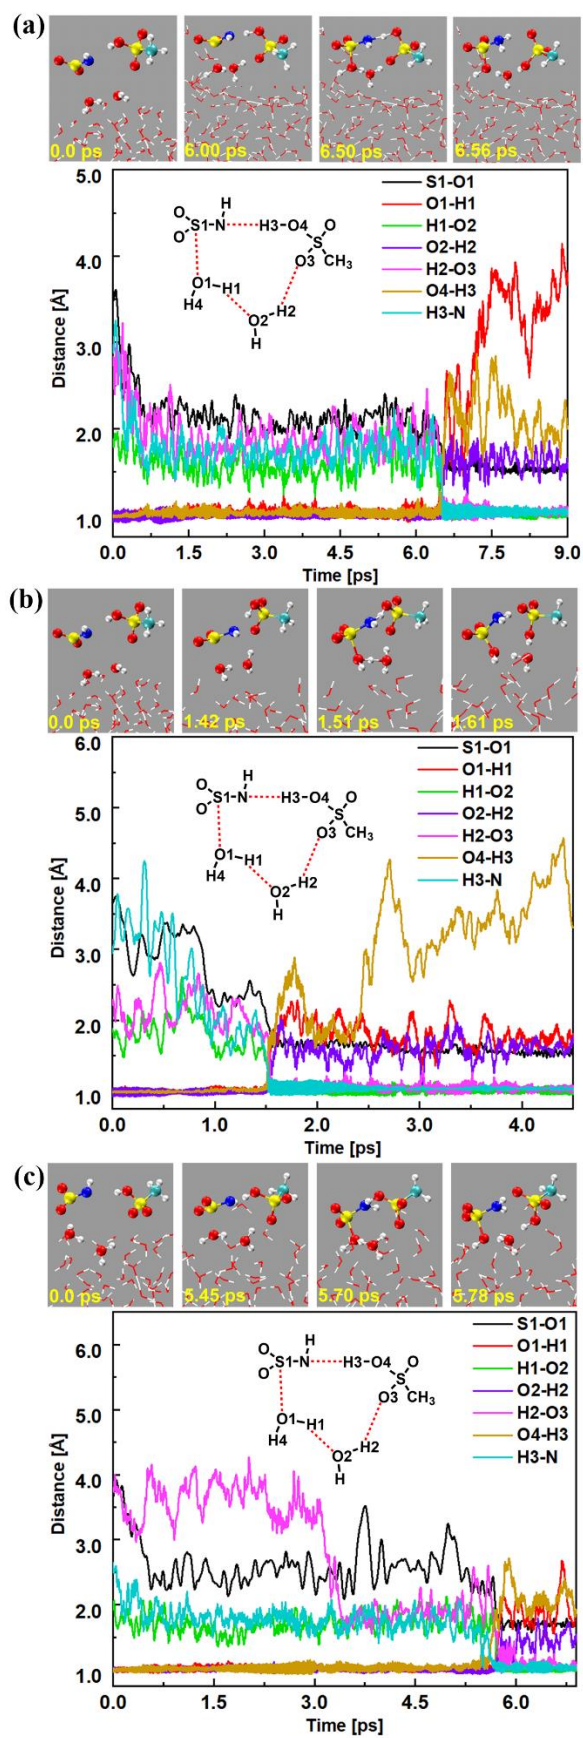

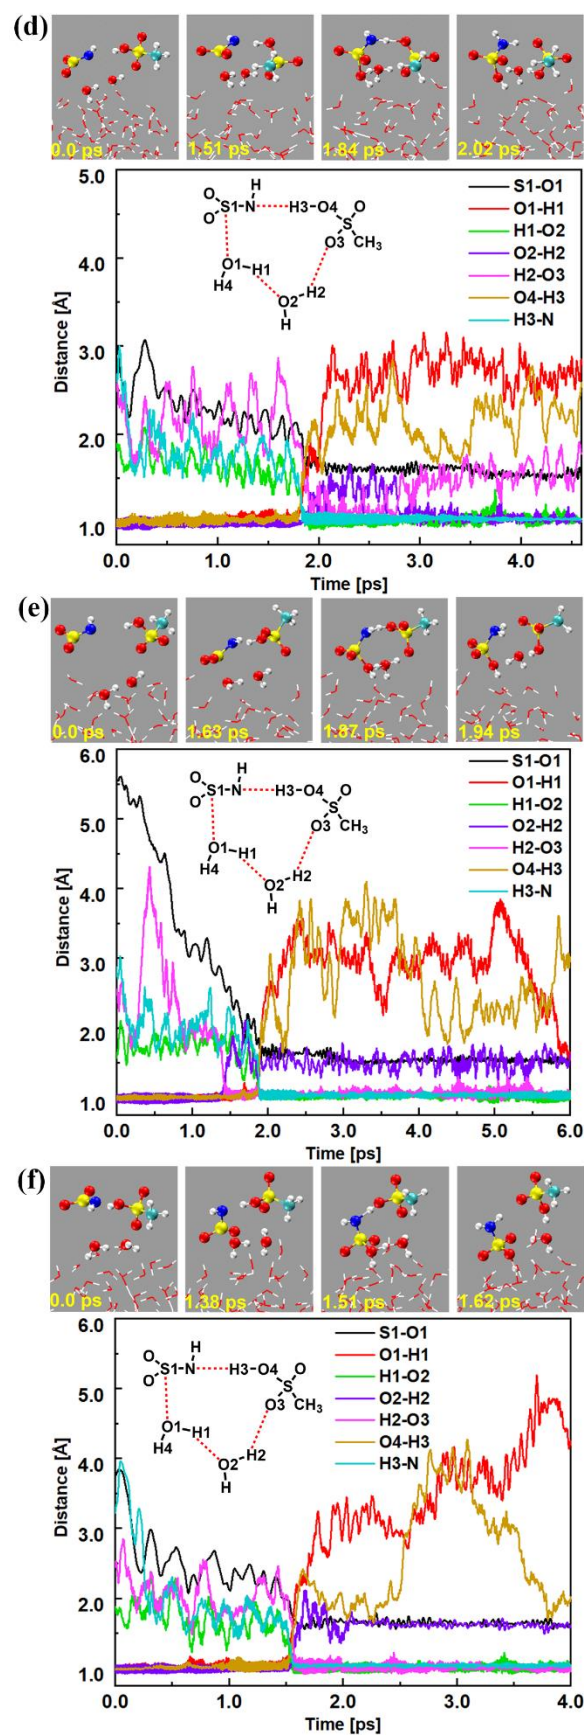

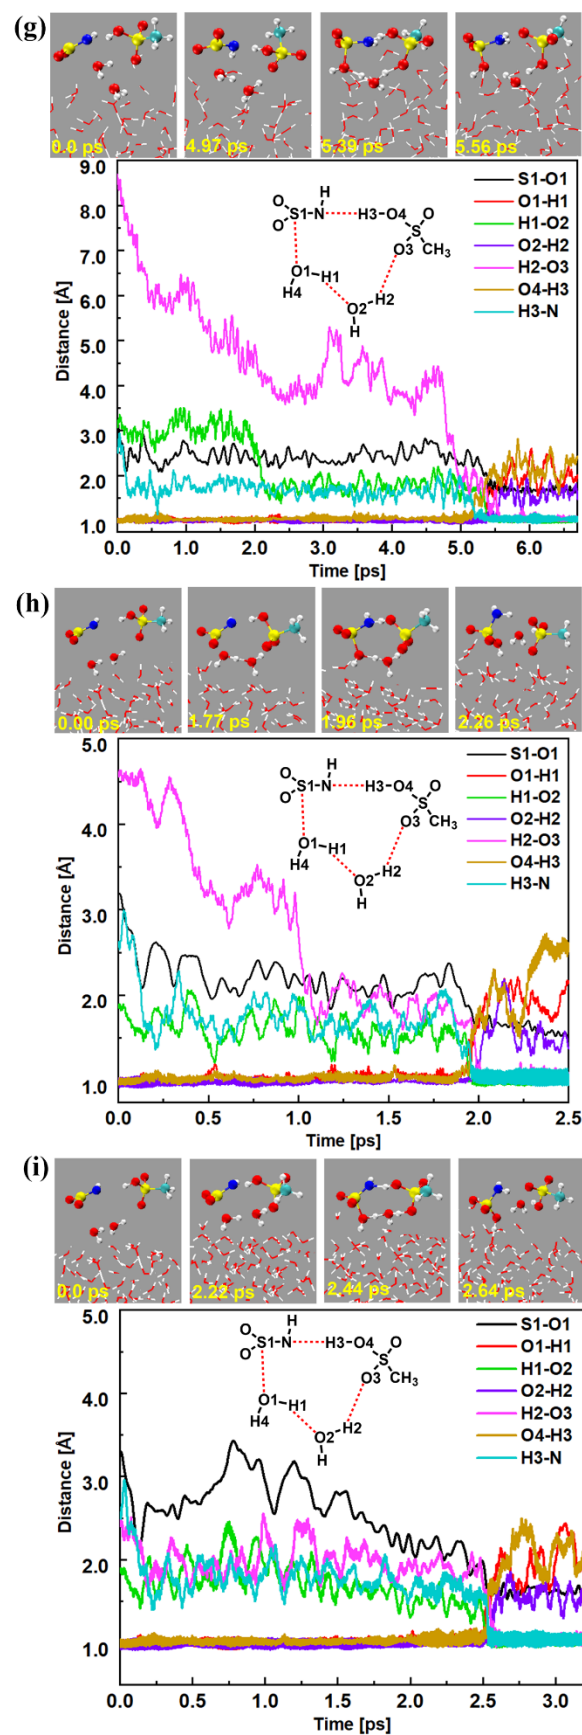

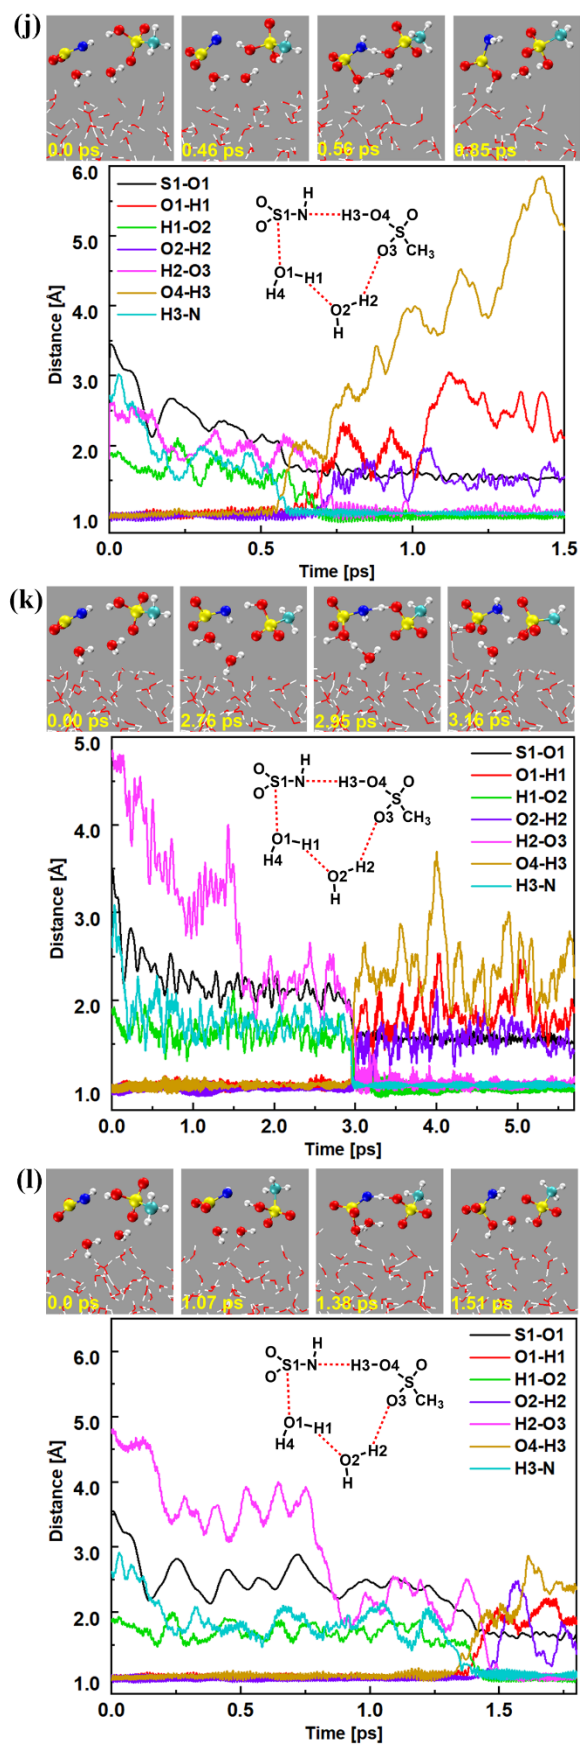



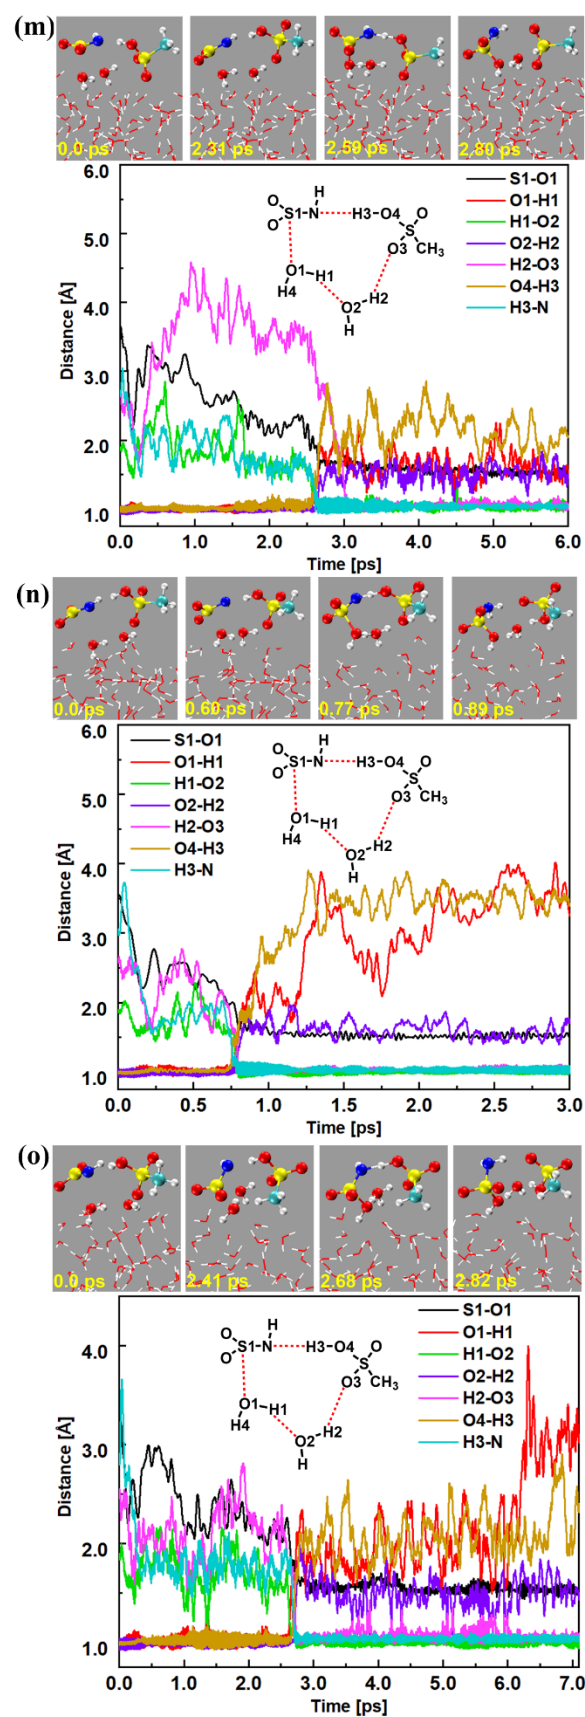

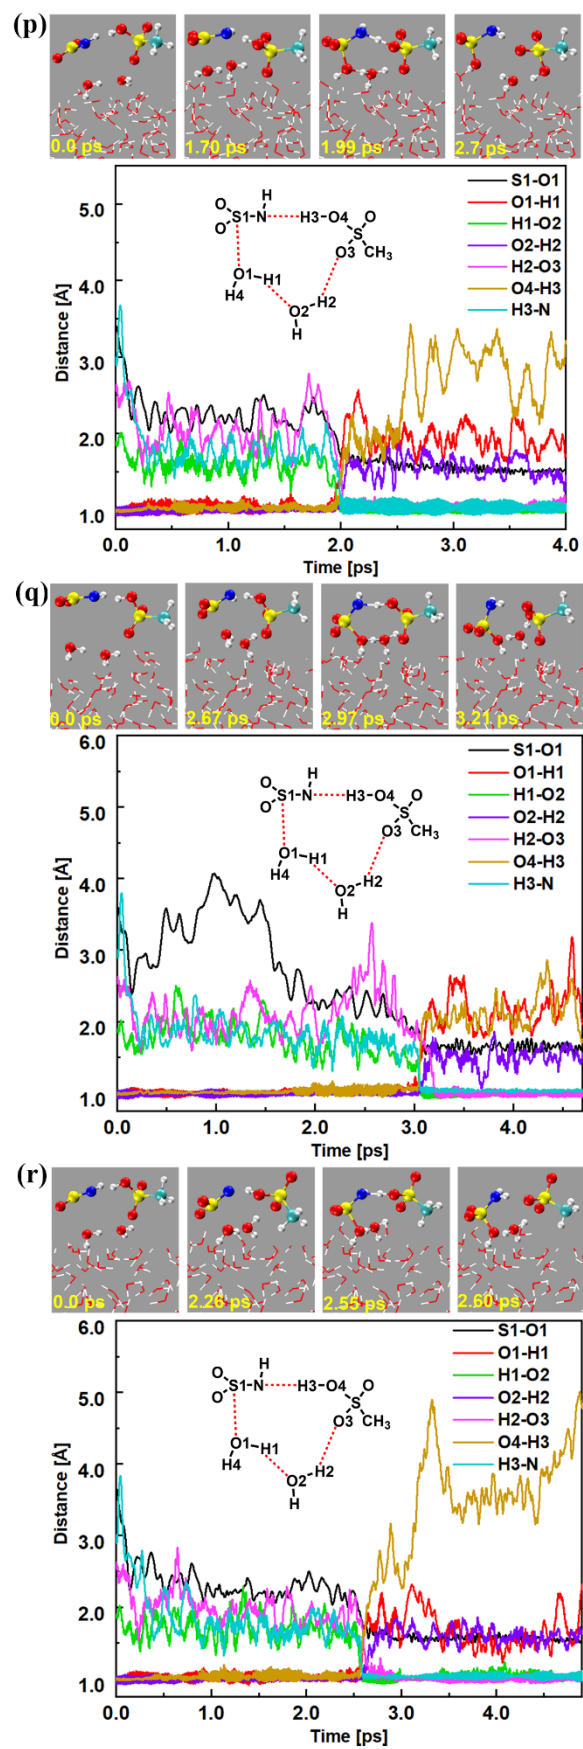

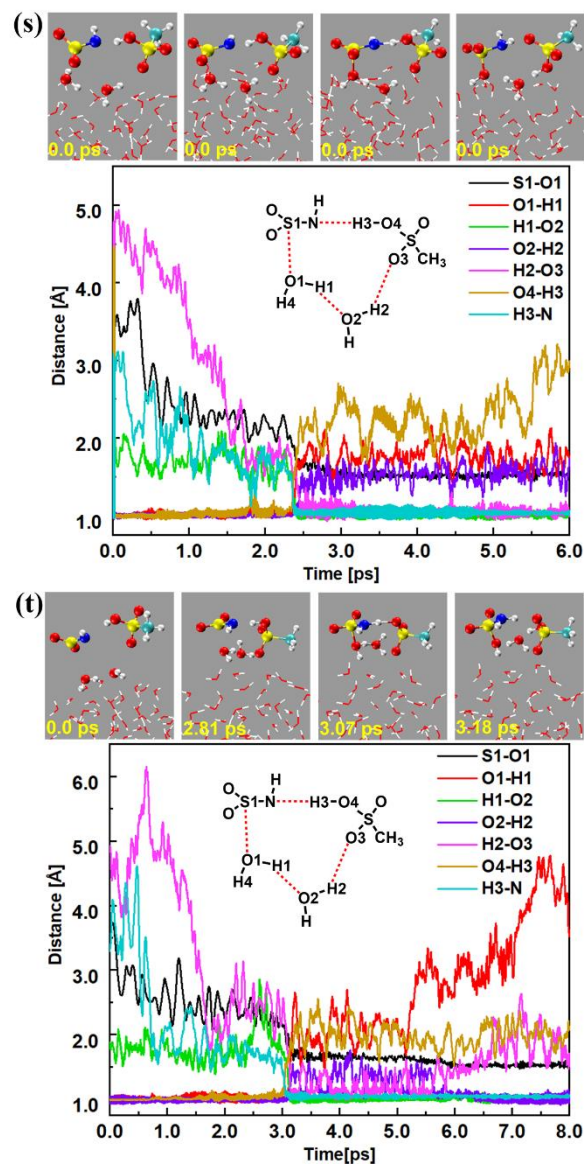

**Fig.S13** BOMD simulation trajectories and snapshots of proton exchange mechanism in  $\text{CH}_3\text{SO}_3\text{H}$ -mediated hydration  $\text{HNSO}_2$  with two water molecules at the air-water interface



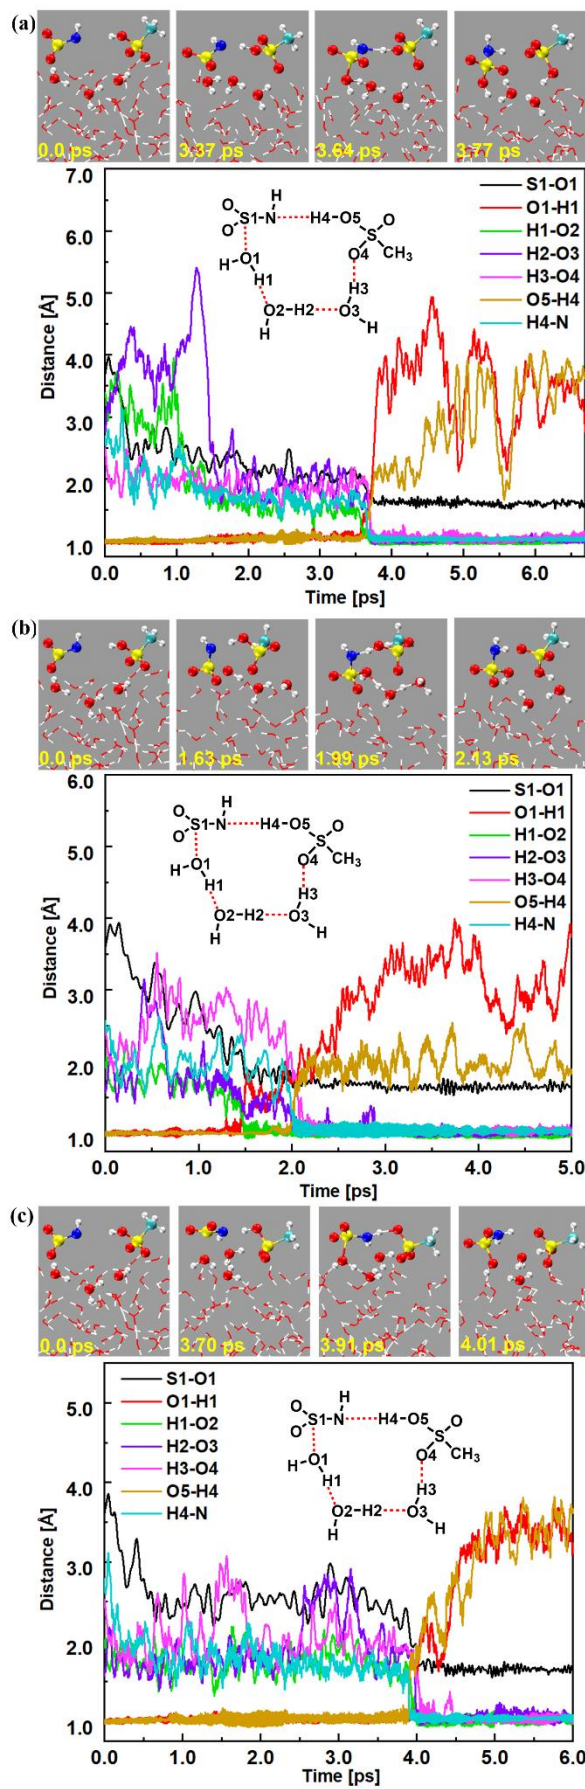

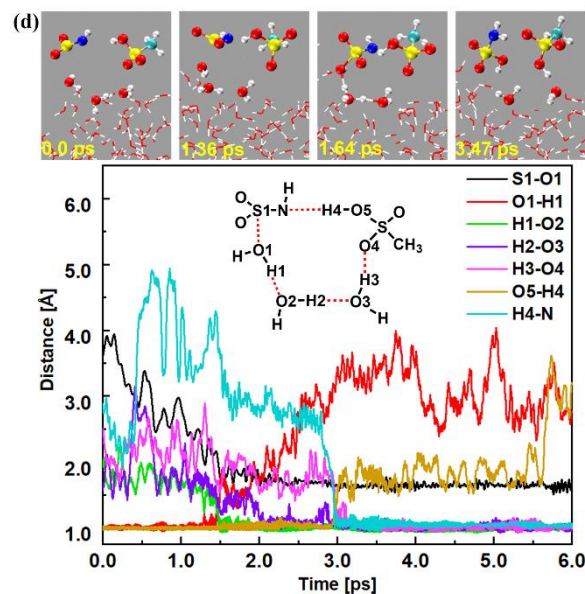

**Fig. S14** BOMD simulation trajectories and snapshots of proton exchange mechanism in  $\text{CH}_3\text{SO}_3\text{H}$ -mediated hydration  $\text{HNSO}_2$  with three water molecules at the air-water interface

|                                              |                                        |                                              |                                              |
|----------------------------------------------|----------------------------------------|----------------------------------------------|----------------------------------------------|
|                                              |                                        |                                              |                                              |
| SFA · MSA                                    | SFA · MA                               | SFA · MSA · MA                               | (SFA) <sub>2</sub> · MSA                     |
|                                              |                                        |                                              |                                              |
| SFA · (MSA) <sub>2</sub>                     | (SFA) <sub>2</sub> · MA                | (SFA) <sub>2</sub> · MSA · MA                | SFA · (MSA) <sub>2</sub> · MA                |
|                                              |                                        |                                              |                                              |
| (SFA) <sub>3</sub> · MA                      | SFA · MSA · (MA) <sub>2</sub>          | (SFA) <sub>2</sub> · (MA) <sub>2</sub>       | (SFA) <sub>2</sub> · MSA · (MA) <sub>2</sub> |
|                                              |                                        |                                              |                                              |
| SFA · (MSA) <sub>2</sub> · (MA) <sub>2</sub> | (SFA) <sub>3</sub> · (MA) <sub>2</sub> | (SFA) <sub>2</sub> · MSA · (MA) <sub>3</sub> | (SFA) <sub>3</sub> · (MA) <sub>3</sub>       |

**Fig. S15** The most stable configurations of the SFA-MSA-MA-based clusters identified at the M06-2X/6-311++G(2df,2pd) level of theory. The lengths of hydrogen bonds are given in Å (Color code: blue = nitrogen, yellow = sulfur, red = oxygen, gray = carbon, and white = hydrogen)

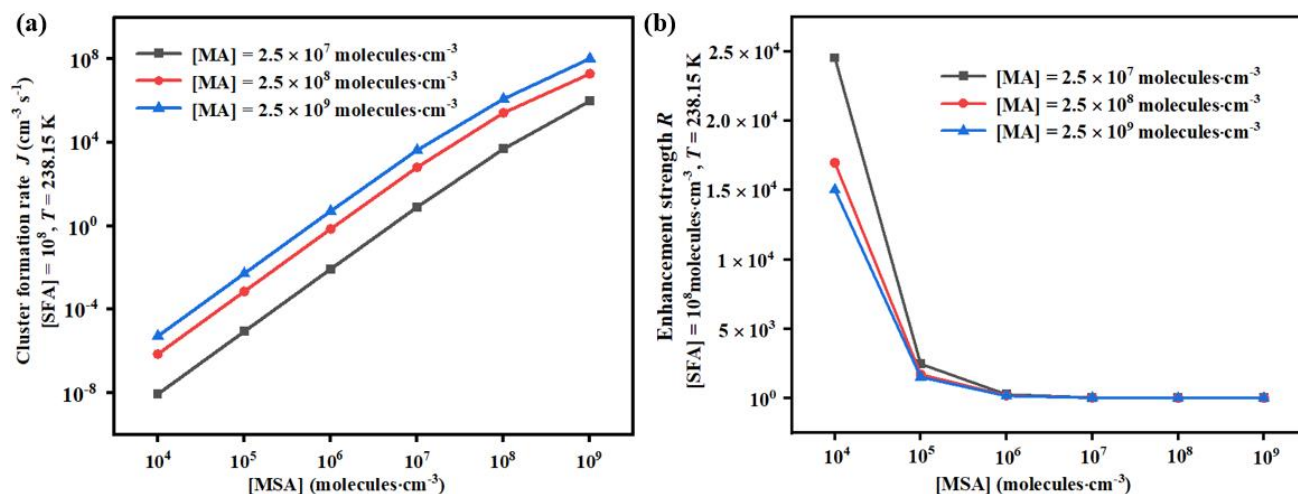

**Fig. S16** (a) The  $J$  ( $\text{cm}^{-3} \text{s}^{-1}$ ) and (b)  $R$  as a function of  $[\text{MSA}]$  with  $[\text{SFA}] = 10^8$  molecules  $\text{cm}^{-3}$  and three different  $[\text{MA}]$  (black line:  $[\text{MA}] = 2.5 \times 10^7$  molecules  $\text{cm}^{-3}$ , red line:  $[\text{MA}] = 2.5 \times 10^8$  molecules  $\text{cm}^{-3}$ , blue line:  $[\text{MA}] = 2.5 \times 10^9$  molecules  $\text{cm}^{-3}$ ) at 238.15 K

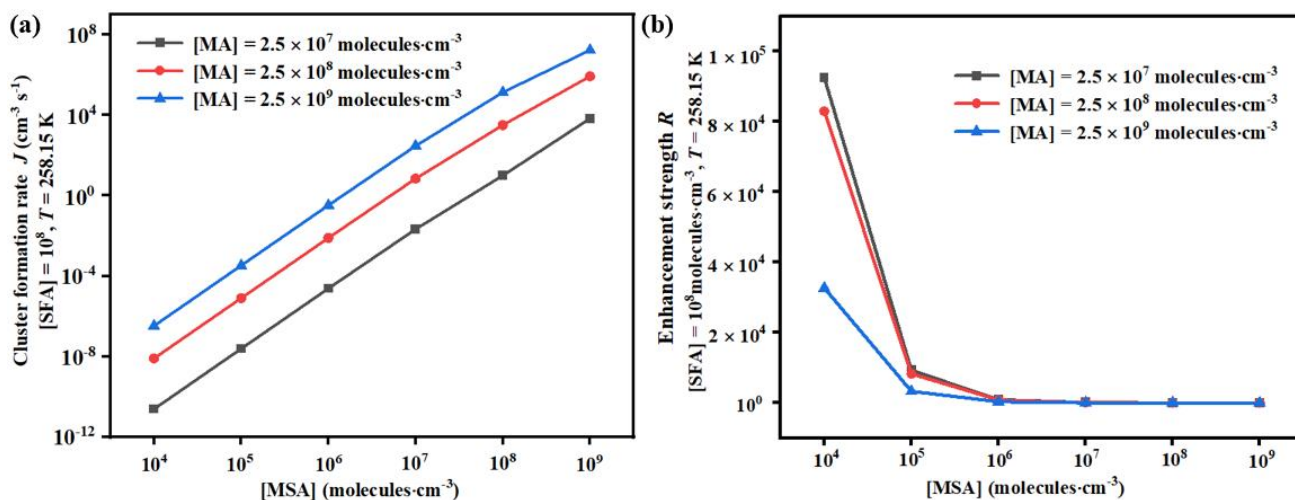

**Fig. S17** (a) The  $J$  ( $\text{cm}^{-3} \text{s}^{-1}$ ) and (b)  $R$  as a function of  $[\text{MSA}]$  with  $[\text{SFA}] = 10^8$  molecules  $\text{cm}^{-3}$  and three different  $[\text{MA}]$  (black line:  $[\text{MA}] = 2.5 \times 10^7$  molecules  $\text{cm}^{-3}$ , red line:  $[\text{MA}] = 2.5 \times 10^8$  molecules  $\text{cm}^{-3}$ , blue line:  $[\text{MA}] = 2.5 \times 10^9$  molecules  $\text{cm}^{-3}$ ) at 258.15 K

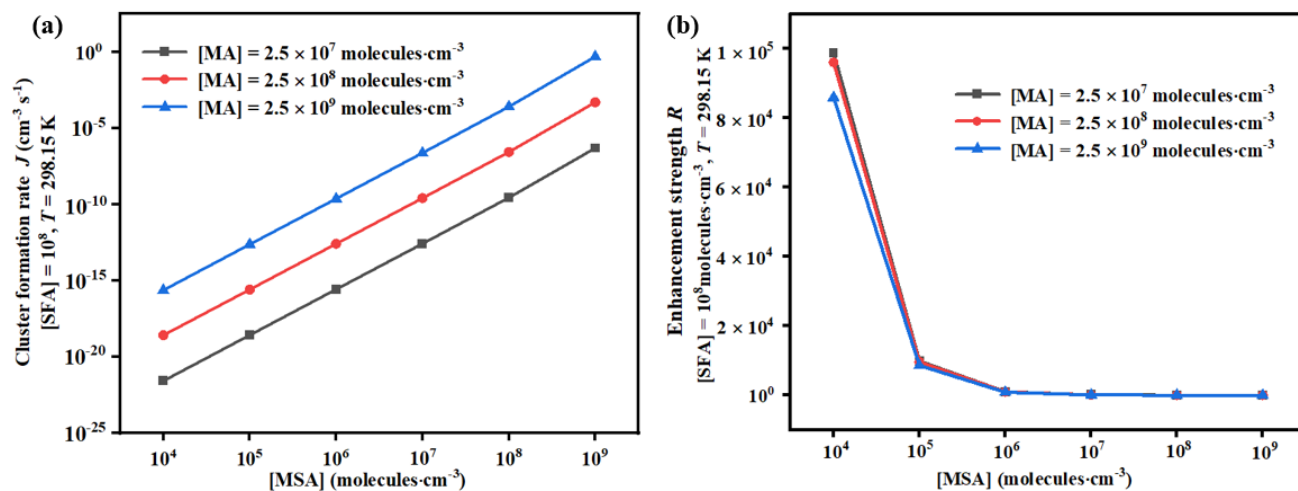

**Fig. S18** (a) The  $J$  ( $\text{cm}^{-3} \text{s}^{-1}$ ) and (b)  $R$  as a function of  $[MSA]$  with  $[SFA] = 10^8$  molecules  $\text{cm}^{-3}$  and three different  $[MA]$  (black line:  $[MA] = 2.5 \times 10^7$  molecules  $\text{cm}^{-3}$ , red line:  $[MA] = 2.5 \times 10^8$  molecules  $\text{cm}^{-3}$ , blue line:  $[MA] = 2.5 \times 10^9$  molecules  $\text{cm}^{-3}$ ) at 298.15 K

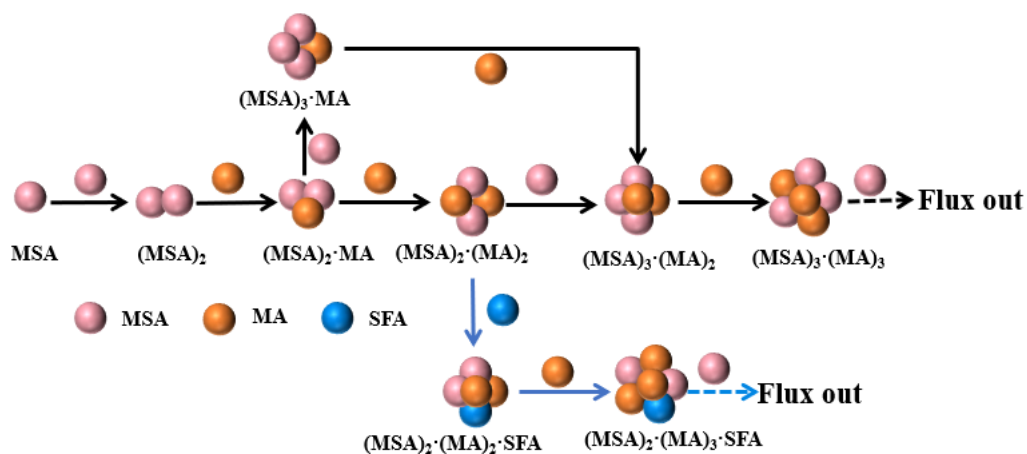

**Fig. S19** Main cluster formation mechanism of MSA-MA-SFA-based system at 238.15 K,  $[\text{MSA}] = 10^7$  molecules $\cdot\text{cm}^{-3}$ ,  $[\text{MA}] = 2.5 \times 10^8$  molecules $\cdot\text{cm}^{-3}$ , and  $[\text{SFA}] = 10^6$  molecules $\cdot\text{cm}^{-3}$ . The black arrows indicate the pure MSA-MA-based growth pathways. Blue arrows represent the pathways containing SFA

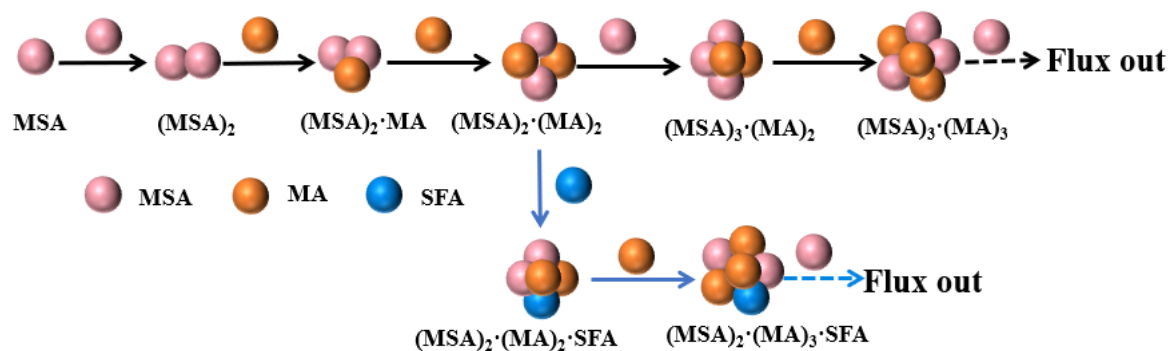

**Fig. S20** Main cluster formation mechanism of MSA-MA-SFA-based system at 258.15 K,  $[\text{MSA}] = 10^7$  molecules $\cdot\text{cm}^{-3}$ ,  $[\text{MA}] = 2.5 \times 10^8$  molecules $\cdot\text{cm}^{-3}$ , and  $[\text{SFA}] = 10^6$  molecules $\cdot\text{cm}^{-3}$ . The black arrows indicate the pure MSA-MA-based growth pathways. Blue arrows represent the pathways containing SFA



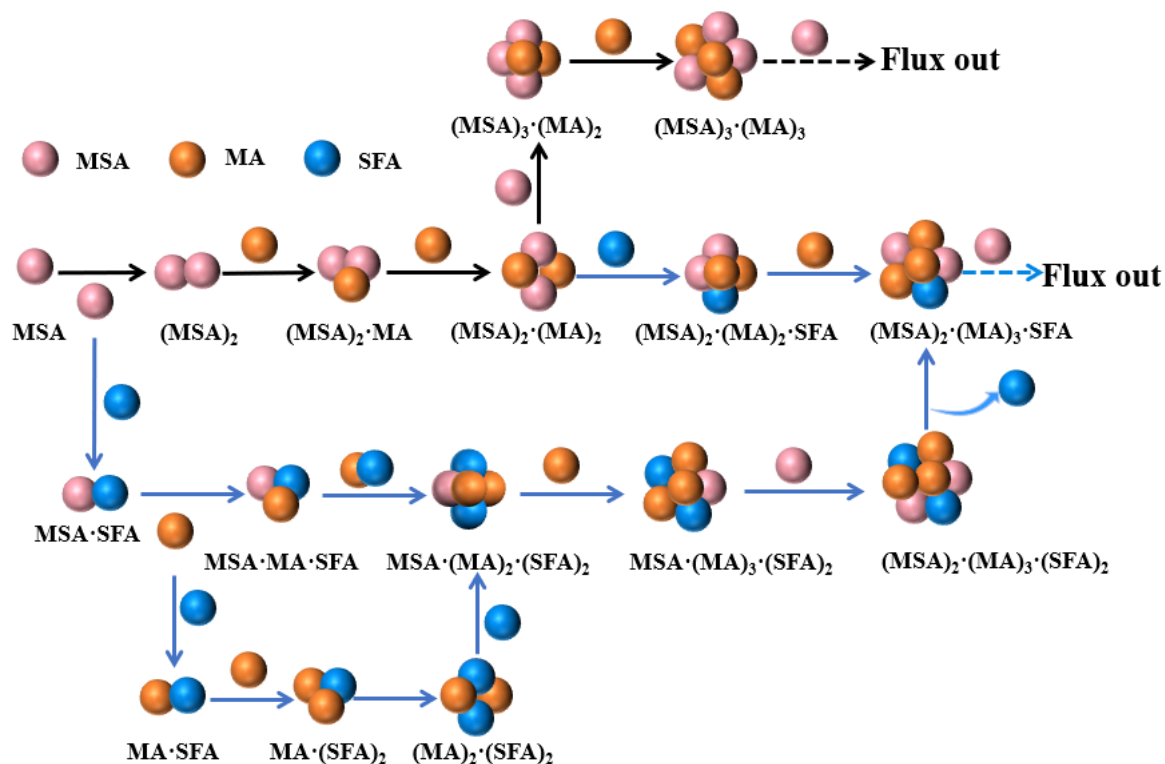

**Fig. S21** Main cluster formation mechanism of MSA-MA-SFA-based system at 298.15 K,  $[\text{MSA}] = 10^7$  molecules $\cdot\text{cm}^{-3}$ ,  $[\text{MA}] = 2.5 \times 10^8$  molecules $\cdot\text{cm}^{-3}$ , and  $[\text{SFA}] = 10^6$  molecules $\cdot\text{cm}^{-3}$ . The black arrows indicate the pure MSA-MA-based growth pathways. Blue arrows represent the pathways containing SFA

**Table S6** The Gibbs free energy for the formation of  $(\text{SFA})_x(\text{MSA})_y(\text{MA})_z$  ( $z \leq x + y \leq 3$ ) clusters  $\Delta G$  (kcal·mol<sup>-1</sup>) at pressure of 1 atm and temperatures of 298.15, 278.15, 258.15, 238.15 and 218.15 K

| Clusters                                   | $T = 298.15$ K                  | $T = 278.15$ K | $T = 258.15$ K | $T = 238.15$ K |
|--------------------------------------------|---------------------------------|----------------|----------------|----------------|
| MSA·MA                                     | -6.19<br>(-5.32) <sup>a</sup>   | -6.87          | -7.56          | -8.25          |
| (MSA) <sub>2</sub>                         | -8.51<br>(-6.76) <sup>a</sup>   | -9.27          | -10.03         | -10.79         |
| (MSA) <sub>2</sub> ·MA                     | -21.17<br>(-20.36) <sup>a</sup> | -22.74         | -24.31         | -25.89         |
| (MSA) <sub>2</sub> ·(MA) <sub>2</sub>      | -34.05<br>(-34.97) <sup>a</sup> | -36.31         | -38.59         | -40.86         |
| (MSA) <sub>3</sub>                         | -11.44<br>(-11.31) <sup>a</sup> | -13.06         | -14.69         | -16.32         |
| (MSA) <sub>3</sub> ·MA                     | -30.29<br>(-31.68) <sup>a</sup> | -32.67         | -35.06         | -37.46         |
| (MSA) <sub>3</sub> ·(MA) <sub>2</sub>      | -46.76<br>(-46.45) <sup>a</sup> | -49.82         | -52.90         | -55.98         |
| (MSA) <sub>3</sub> ·(MA) <sub>3</sub>      | -59.17<br>(-59.33) <sup>a</sup> | -63.17         | -67.19         | -71.22         |
| (SFA) <sub>2</sub>                         | -5.74(-5.76) <sup>b</sup>       | -6.53          | -7.32          | -8.11          |
| MA·SFA                                     | -6.01                           | -6.73          | -7.45          | -8.17          |
| (MA) <sub>2</sub> ·(SFA) <sub>2</sub>      | -31.26                          | -33.53         | -35.81         | -38.09         |
| MA·(SFA) <sub>2</sub>                      | -23.85                          | -25.37         | -26.90         | -28.48         |
| MSA·SFA                                    | -9.33                           | -10.13         | -10.93         | -11.73         |
| MSA·MA·SFA                                 | -21.96                          | -23.57         | -25.18         | -26.79         |
| MSA·(MA) <sub>2</sub> ·SFA                 | -26.08                          | -28.48         | -30.89         | -33.31         |
| (SFA) <sub>3</sub>                         | -11.87                          | -13.56         | -15.27         | -16.97         |
| MSA <sub>2</sub> ·MA·SFA                   | -24.29                          | -26.66         | -29.05         | -31.44         |
| (MSA) <sub>2</sub> ·(MA) <sub>2</sub> ·SFA | -44.62                          | -47.82         | -51.03         | -54.25         |
| (MSA) <sub>2</sub> ·(MA) <sub>3</sub> ·SFA | -57.46                          | -61.43         | -65.42         | -69.41         |
| MSA·(SFA) <sub>2</sub>                     | -12.26                          | -13.89         | -15.52         | -17.15         |
| MA·(SFA) <sub>3</sub>                      | -29.46                          | -32.01         | -34.57         | -37.13         |
| MSA·(MA) <sub>2</sub> ·(SFA) <sub>2</sub>  | -45.12                          | -48.25         | -51.39         | -54.53         |
| (MSA) <sub>2</sub> ·SFA                    | -9.11                           | -10.75         | -12.40         | -14.06         |
| MSA·MA·(SFA) <sub>2</sub>                  | -31.11                          | -33.56         | -36.01         | -38.47         |
| (MA) <sub>2</sub> ·(SFA) <sub>3</sub>      | -44.04                          | -47.11         | -50.19         | -53.28         |
| MSA·(MA) <sub>3</sub> ·(SFA) <sub>2</sub>  | -62.91                          | -66.77         | -70.63         | -74.52         |
| (MA) <sub>3</sub> ·(SFA) <sub>3</sub>      | -53.82                          | -57.87         | -61.94         | -66.01         |

<sup>a</sup> The value was taken from reference (Liu, L., Yu, F., Tu, K., Yang, Z., and Zhang, X.: Influence of atmospheric conditions on the role of trifluoroacetic acid in atmospheric sulfuric acid-dimethylamine nucleation, *Atmos. Chem. Phys.*, 21, 6221-6230, <https://doi.org/10.5194/acp-21-6221-2021>, 2021.)

<sup>b</sup> The value was taken from reference (Shen, J., Elm, J., Xie, H. B., Chen, J., Niu, J., and Vehkamäki, H.: Structural effects of amines in enhancing methanesulfonic acid-driven new particle formation, *Environ. Sci. Technol.*, 54, 13498-13508, <https://doi.org/10.1021/acs.est.0c05358>, 2020.)

224  
225

**Table S7** Evaporation rates  $\gamma$  ( $\text{s}^{-1}$ ) for the studied clusters at different temperatures of 298.15, 278.15, 258.15, 238.15 and 218.15 K

| Evaporation pathways                                                                              | 298.15 K              | 278.15 K              | 258.15 K              | 238.15 K               |
|---------------------------------------------------------------------------------------------------|-----------------------|-----------------------|-----------------------|------------------------|
| $\text{MSA} \cdot \text{MA} \rightarrow \text{MSA} + \text{MA}$                                   | $1.05 \times 10^5$    | $1.44 \times 10^4$    | $1.43 \times 10^3$    | $9.62 \times 10^1$     |
| $\text{MSA} \cdot \text{SFA} \rightarrow \text{MSA} + \text{SFA}$                                 | $2.75 \times 10^2$    | $2.09 \times 10^1$    | $1.06 \times 10^0$    | $3.25 \times 10^{-2}$  |
| $\text{MA} \cdot \text{SFA} \rightarrow \text{MA} + \text{SFA}$                                   | $1.26 \times 10^5$    | $1.66 \times 10^4$    | $1.59 \times 10^3$    | $1.03 \times 10^2$     |
| $(\text{MSA})_2 \rightarrow \text{MSA} + \text{MSA}$                                              | $1.23 \times 10^3$    | $1.11 \times 10^2$    | $6.85 \times 10^0$    | $2.65 \times 10^{-1}$  |
| $(\text{SFA})_2 \rightarrow \text{SFA} + \text{SFA}$                                              | $1.05 \times 10^5$    | $1.26 \times 10^4$    | $1.08 \times 10^3$    | $6.08 \times 10^1$     |
| $(\text{MSA})_2 \cdot \text{MA} \rightarrow (\text{MSA})_2 + \text{MA}$                           | $2.90 \times 10^0$    | $1.43 \times 10^{-1}$ | $4.43 \times 10^{-3}$ | $7.64 \times 10^{-5}$  |
| $(\text{MSA})_2 \cdot \text{MA} \rightarrow \text{MSA} \cdot \text{MA} + \text{MSA}$              | $2.84 \times 10^{-2}$ | $9.29 \times 10^{-4}$ | $1.79 \times 10^{-5}$ | $1.77 \times 10^{-7}$  |
| $(\text{MSA})_2 \cdot (\text{MA})_2 \rightarrow (\text{MSA})_2 \cdot \text{MA} + \text{MA}$       | $1.96 \times 10^0$    | $1.17 \times 10^{-1}$ | $4.48 \times 10^{-3}$ | $9.83 \times 10^{-5}$  |
| $\text{MA} \cdot (\text{SFA})_2 \rightarrow (\text{SFA})_2 + \text{MA}$                           | $2.82 \times 10^{-4}$ | $8.28 \times 10^{-6}$ | $1.41 \times 10^{-7}$ | $1.21 \times 10^{-9}$  |
| $\text{MA} \cdot (\text{SFA})_2 \rightarrow \text{MA} \cdot \text{SFA} + \text{SFA}$              | $1.95 \times 10^{-4}$ | $5.22 \times 10^{-6}$ | $7.93 \times 10^{-8}$ | $5.96 \times 10^{-10}$ |
| $(\text{MA})_2 \cdot (\text{SFA})_2 \rightarrow \text{MA} \cdot (\text{SFA})_2 + \text{MA}$       | $1.93 \times 10^4$    | $2.04 \times 10^3$    | $1.50 \times 10^2$    | $7.06 \times 10^0$     |
| $(\text{MSA})_2 \cdot \text{SFA} \rightarrow (\text{MSA})_2 + \text{SFA}$                         | $8.88 \times 10^8$    | $1.66 \times 10^8$    | $2.37 \times 10^7$    | $2.43 \times 10^6$     |
| $(\text{MSA})_2 \cdot \text{SFA} \rightarrow \text{MSA} \cdot \text{SFA} + \text{MSA}$            | $3.81 \times 10^9$    | $8.44 \times 10^8$    | $1.48 \times 10^8$    | $1.91 \times 10^7$     |
| $\text{MSA} \cdot (\text{SFA})_2 \rightarrow (\text{SFA})_2 + \text{MSA}$                         | $4.27 \times 10^4$    | $4.24 \times 10^3$    | $2.94 \times 10^2$    | $1.30 \times 10^1$     |
| $\text{MSA} \cdot (\text{SFA})_2 \rightarrow \text{MSA} \cdot \text{SFA} + \text{SFA}$            | $1.69 \times 10^7$    | $2.66 \times 10^6$    | $3.11 \times 10^5$    | $2.53 \times 10^4$     |
| $(\text{MSA})_3 \rightarrow (\text{MSA})_2 + \text{MSA}$                                          | $1.89 \times 10^7$    | $2.78 \times 10^6$    | $3.01 \times 10^5$    | $2.23 \times 10^4$     |
| $(\text{SFA})_3 \rightarrow (\text{SFA})_2 + \text{SFA}$                                          | $7.60 \times 10^4$    | $6.96 \times 10^3$    | $4.38 \times 10^2$    | $1.74 \times 10^1$     |
| $(\text{MSA})_3 \cdot \text{MA} \rightarrow (\text{MSA})_2 \cdot \text{MA} + \text{MSA}$          | $5.28 \times 10^2$    | $4.00 \times 10^1$    | $2.01 \times 10^0$    | $6.10 \times 10^{-2}$  |
| $(\text{MSA})_3 \cdot \text{MA} \rightarrow (\text{MSA})_3 + \text{MA}$                           | $7.77 \times 10^{-5}$ | $1.98 \times 10^{-6}$ | $2.85 \times 10^{-8}$ | $2.01 \times 10^{-10}$ |
| $(\text{MSA})_3 \cdot (\text{MA})_2 \rightarrow (\text{MSA})_2 \cdot (\text{MA})_2 + \text{MSA}$  | $1.44 \times 10^0$    | $7.28 \times 10^{-2}$ | $2.30 \times 10^{-3}$ | $4.04 \times 10^{-5}$  |
| $(\text{MSA})_3 \cdot (\text{MA})_2 \rightarrow (\text{MSA})_3 \cdot \text{MA} + \text{MA}$       | $4.74 \times 10^{-3}$ | $1.88 \times 10^{-4}$ | $4.50 \times 10^{-6}$ | $5.73 \times 10^{-8}$  |
| $(\text{MSA})_3 \cdot (\text{MA})_3 \rightarrow (\text{MSA})_3 \cdot (\text{MA})_2 + \text{MA}$   | $8.39 \times 10^2$    | $4.86 \times 10^1$    | $1.81 \times 10^0$    | $3.82 \times 10^{-2}$  |
| $\text{MA} \cdot (\text{SFA})_3 \rightarrow \text{MA} \cdot (\text{SFA})_2 + \text{SFA}$          | $1.74 \times 10^5$    | $1.36 \times 10^4$    | $7.16 \times 10^2$    | $2.28 \times 10^1$     |
| $\text{MA} \cdot (\text{SFA})_3 \rightarrow (\text{SFA})_3 + \text{MA}$                           | $7.03 \times 10^{-4}$ | $1.76 \times 10^{-5}$ | $2.50 \times 10^{-7}$ | $1.73 \times 10^{-9}$  |
| $(\text{MA})_2 \cdot (\text{SFA})_3 \rightarrow (\text{MA})_2 \cdot (\text{SFA})_2 + \text{SFA}$  | $1.09 \times 10^0$    | $5.40 \times 10^{-2}$ | $1.67 \times 10^{-3}$ | $2.87 \times 10^{-5}$  |
| $(\text{MA})_2 \cdot (\text{SFA})_3 \rightarrow \text{MA} \cdot (\text{SFA})_3 + \text{MA}$       | $1.35 \times 10^{-1}$ | $9.04 \times 10^{-3}$ | $3.92 \times 10^{-4}$ | $9.95 \times 10^{-6}$  |
| $(\text{MA})_3 \cdot (\text{SFA})_3 \rightarrow (\text{MA})_2 \cdot (\text{SFA})_3 + \text{MA}$   | $3.03 \times 10^6$    | $3.94 \times 10^5$    | $3.71 \times 10^4$    | $2.33 \times 10^3$     |
| $\text{MSA} \cdot \text{SFA} \cdot \text{MA} \rightarrow \text{MA} \cdot \text{SFA} + \text{MSA}$ | $5.18 \times 10^{-3}$ | $1.50 \times 10^{-4}$ | $2.50 \times 10^{-6}$ | $2.09 \times 10^{-8}$  |

| Evaporation pathways                                                                                                              | 298.15 K              | 278.15 K              | 258.15 K              | 238.15 K               |
|-----------------------------------------------------------------------------------------------------------------------------------|-----------------------|-----------------------|-----------------------|------------------------|
| $\text{MSA} \cdot \text{MA} \cdot \text{SFA} \rightarrow \text{MSA} \cdot \text{MA} + \text{SFA}$                                 | $6.71 \times 10^{-3}$ | $1.88 \times 10^{-4}$ | $3.01 \times 10^{-6}$ | $2.41 \times 10^{-8}$  |
| $\text{MSA} \cdot \text{MA} \cdot \text{SFA} \rightarrow \text{MSA} \cdot \text{SFA} + \text{MA}$                                 | $2.95 \times 10^0$    | $1.48 \times 10^{-1}$ | $4.67 \times 10^{-3}$ | $8.22 \times 10^{-5}$  |
| $\text{MSA} \cdot (\text{MA})_2 \cdot \text{SFA} \rightarrow \text{MSA} \cdot \text{MA} \cdot \text{SFA} + \text{MA}$             | $5.20 \times 10^6$    | $7.41 \times 10^5$    | $7.78 \times 10^4$    | $5.55 \times 10^3$     |
| $(\text{MSA})_2 \cdot \text{MA} \cdot \text{SFA} \rightarrow \text{MSA} \cdot \text{MA} \cdot \text{SFA} + \text{MSA}$            | $5.01 \times 10^7$    | $9.32 \times 10^6$    | $1.32 \times 10^6$    | $1.33 \times 10^5$     |
| $(\text{MSA})_2 \cdot \text{MA} \cdot \text{SFA} \rightarrow (\text{MSA})_2 \cdot \text{MA} + \text{SFA}$                         | $1.22 \times 10^7$    | $1.93 \times 10^6$    | $2.28 \times 10^5$    | $1.86 \times 10^4$     |
| $(\text{MSA})_2 \cdot \text{MA} \cdot \text{SFA} \rightarrow (\text{MSA})_2 \cdot \text{SFA} + \text{MA}$                         | $3.96 \times 10^{-2}$ | $1.67 \times 10^{-3}$ | $4.26 \times 10^{-5}$ | $5.85 \times 10^{-7}$  |
| $(\text{MSA})_2 \cdot (\text{MA})_2 \cdot \text{SFA} \rightarrow \text{MSA} \cdot (\text{MA})_2 \cdot \text{SFA} + \text{MSA}$    | $7.15 \times 10^{-5}$ | $1.78 \times 10^{-6}$ | $2.48 \times 10^{-8}$ | $1.68 \times 10^{-10}$ |
| $(\text{MSA})_2 \cdot (\text{MA})_2 \cdot \text{SFA} \rightarrow (\text{MSA})_2 \cdot (\text{MA})_2 + \text{SFA}$                 | $4.97 \times 10^1$    | $2.53 \times 10^0$    | $8.06 \times 10^{-2}$ | $1.43 \times 10^{-3}$  |
| $(\text{MSA})_2 \cdot (\text{MA})_2 \cdot \text{SFA} \rightarrow (\text{MSA})_2 \cdot \text{MA} \cdot \text{SFA} + \text{MA}$     | $8.46 \times 10^{-6}$ | $1.62 \times 10^{-7}$ | $1.67 \times 10^{-9}$ | $7.97 \times 10^{-12}$ |
| $(\text{MSA})_2 \cdot (\text{MA})_3 \cdot \text{SFA} \rightarrow (\text{MSA})_2 \cdot (\text{MA})_2 \cdot \text{SFA} + \text{MA}$ | $2.58 \times 10^0$    | $1.35 \times 10^{-1}$ | $4.42 \times 10^{-3}$ | $8.09 \times 10^{-5}$  |
| $\text{MSA} \cdot \text{MA} \cdot (\text{SFA})_2 \rightarrow \text{MA} \cdot (\text{SFA})_2 + \text{MSA}$                         | $1.17 \times 10^4$    | $9.09 \times 10^2$    | $4.72 \times 10^1$    | $1.48 \times 10^0$     |
| $\text{MSA} \cdot \text{MA} \cdot (\text{SFA})_2 \rightarrow \text{MSA} \cdot \text{MA} \cdot \text{SFA} + \text{SFA}$            | $4.54 \times 10^2$    | $3.26 \times 10^1$    | $1.54 \times 10^0$    | $4.35 \times 10^{-2}$  |
| $\text{MSA} \cdot \text{MA} \cdot (\text{SFA})_2 \rightarrow \text{MSA} \cdot (\text{SFA})_2 + \text{MA}$                         | $8.61 \times 10^{-5}$ | $1.98 \times 10^{-6}$ | $2.52 \times 10^{-8}$ | $1.54 \times 10^{-10}$ |
| $\text{MSA} \cdot (\text{MA})_2 \cdot (\text{SFA})_2 \rightarrow (\text{MA})_2 \cdot (\text{SFA})_2 + \text{MSA}$                 | $1.90 \times 10^{-1}$ | $7.44 \times 10^{-3}$ | $1.76 \times 10^{-4}$ | $2.21 \times 10^{-6}$  |
| $\text{MSA} \cdot (\text{MA})_2 \cdot (\text{SFA})_2 \rightarrow \text{MSA} \cdot (\text{MA})_2 \cdot \text{SFA} + \text{SFA}$    | $2.81 \times 10^{-5}$ | $7.52 \times 10^{-7}$ | $1.14 \times 10^{-8}$ | $8.49 \times 10^{-11}$ |
| $\text{MSA} \cdot (\text{MA})_2 \cdot (\text{SFA})_2 \rightarrow \text{MSA} \cdot \text{MA} \cdot (\text{SFA})_2 + \text{MA}$     | $2.85 \times 10^{-1}$ | $1.51 \times 10^{-2}$ | $5.07 \times 10^{-4}$ | $9.58 \times 10^{-6}$  |
| $\text{MSA} \cdot (\text{MA})_3 \cdot (\text{SFA})_2 \rightarrow \text{MSA} \cdot (\text{MA})_2 \cdot (\text{SFA})_2 + \text{MA}$ | $2.24 \times 10^5$    | $2.99 \times 10^4$    | $2.91 \times 10^3$    | $1.91 \times 10^2$     |

| Collisions                                  | $\beta$ (cm <sup>3</sup> ·s <sup>-1</sup> ) |                        |                        |                        |
|---------------------------------------------|---------------------------------------------|------------------------|------------------------|------------------------|
|                                             | 298.15 K                                    | 278.15 K               | 258.15 K               | 238.15 K               |
| MSA + MA                                    | $1.48 \times 10^{-10}$                      | $1.38 \times 10^{-10}$ | $1.28 \times 10^{-10}$ | $1.18 \times 10^{-10}$ |
| MSA + SFA                                   | $7.78 \times 10^{-11}$                      | $7.26 \times 10^{-11}$ | $6.73 \times 10^{-11}$ | $6.21 \times 10^{-11}$ |
| MA + SFA                                    | $1.31 \times 10^{-10}$                      | $1.22 \times 10^{-10}$ | $1.14 \times 10^{-10}$ | $1.05 \times 10^{-10}$ |
| MSA + MSA                                   | $8.68 \times 10^{-11}$                      | $8.10 \times 10^{-11}$ | $7.52 \times 10^{-11}$ | $6.94 \times 10^{-11}$ |
| SFA + SFA                                   | $6.93 \times 10^{-11}$                      | $6.46 \times 10^{-11}$ | $6.00 \times 10^{-11}$ | $5.53 \times 10^{-11}$ |
| (MSA) <sub>2</sub> + MA                     | $2.23 \times 10^{-10}$                      | $2.08 \times 10^{-10}$ | $1.93 \times 10^{-10}$ | $1.78 \times 10^{-10}$ |
| MSA·MA + MSA                                | $1.11 \times 10^{-10}$                      | $1.03 \times 10^{-10}$ | $9.58 \times 10^{-11}$ | $8.84 \times 10^{-11}$ |
| (MSA) <sub>2</sub> ·MA + MA                 | $2.24 \times 10^{-10}$                      | $2.09 \times 10^{-10}$ | $1.94 \times 10^{-10}$ | $1.79 \times 10^{-10}$ |
| (SFA) <sub>2</sub> + MA                     | $2.17 \times 10^{-10}$                      | $2.02 \times 10^{-10}$ | $1.88 \times 10^{-10}$ | $1.73 \times 10^{-10}$ |
| MA·SFA + SFA                                | $9.54 \times 10^{-11}$                      | $8.90 \times 10^{-11}$ | $8.26 \times 10^{-11}$ | $7.62 \times 10^{-11}$ |
| MA·(SFA) <sub>2</sub> + MA                  | $2.14 \times 10^{-10}$                      | $1.99 \times 10^{-10}$ | $1.85 \times 10^{-10}$ | $1.71 \times 10^{-10}$ |
| (MSA) <sub>2</sub> + SFA                    | $9.84 \times 10^{-11}$                      | $9.18 \times 10^{-11}$ | $8.52 \times 10^{-11}$ | $7.86 \times 10^{-11}$ |
| MSA·SFA + MSA                               | $1.06 \times 10^{-10}$                      | $9.89 \times 10^{-11}$ | $9.18 \times 10^{-11}$ | $8.47 \times 10^{-11}$ |
| (SFA) <sub>2</sub> + MSA                    | $1.04 \times 10^{-10}$                      | $9.73 \times 10^{-11}$ | $9.03 \times 10^{-11}$ | $8.33 \times 10^{-11}$ |
| MSA·SFA + SFA                               | $9.70 \times 10^{-11}$                      | $9.05 \times 10^{-11}$ | $8.40 \times 10^{-11}$ | $7.75 \times 10^{-11}$ |
| (MSA) <sub>2</sub> + MSA                    | $1.07 \times 10^{-10}$                      | $1.00 \times 10^{-10}$ | $9.30 \times 10^{-11}$ | $8.58 \times 10^{-11}$ |
| (SFA) <sub>2</sub> + SFA                    | $9.54 \times 10^{-11}$                      | $8.90 \times 10^{-11}$ | $8.26 \times 10^{-11}$ | $7.62 \times 10^{-11}$ |
| (MSA) <sub>2</sub> ·MA + MSA                | $1.05 \times 10^{-10}$                      | $9.77 \times 10^{-11}$ | $9.07 \times 10^{-11}$ | $8.36 \times 10^{-11}$ |
| (MSA) <sub>3</sub> + MA                     | $2.09 \times 10^{-10}$                      | $1.95 \times 10^{-10}$ | $1.81 \times 10^{-10}$ | $1.67 \times 10^{-10}$ |
| (MSA) <sub>2</sub> ·(MA) <sub>2</sub> + MSA | $1.23 \times 10^{-10}$                      | $1.15 \times 10^{-10}$ | $1.07 \times 10^{-10}$ | $9.83 \times 10^{-11}$ |
| (MSA) <sub>3</sub> ·MA + MA                 | $2.32 \times 10^{-10}$                      | $2.16 \times 10^{-10}$ | $2.01 \times 10^{-10}$ | $1.85 \times 10^{-10}$ |
| (MSA) <sub>3</sub> ·(MA) <sub>2</sub> + MA  | $2.72 \times 10^{-10}$                      | $2.53 \times 10^{-10}$ | $2.35 \times 10^{-10}$ | $2.17 \times 10^{-10}$ |
| MA·(SFA) <sub>2</sub> + SFA                 | $9.15 \times 10^{-11}$                      | $8.54 \times 10^{-11}$ | $7.92 \times 10^{-11}$ | $7.31 \times 10^{-11}$ |
| (SFA) <sub>3</sub> + MA                     | $2.26 \times 10^{-10}$                      | $2.11 \times 10^{-10}$ | $1.96 \times 10^{-10}$ | $1.81 \times 10^{-10}$ |
| (MA) <sub>2</sub> ·(SFA) <sub>2</sub> + SFA | $1.03 \times 10^{-10}$                      | $9.64 \times 10^{-11}$ | $8.94 \times 10^{-11}$ | $8.25 \times 10^{-11}$ |
| MA·(SFA) <sub>3</sub> + MA                  | $2.70 \times 10^{-10}$                      | $2.52 \times 10^{-10}$ | $2.34 \times 10^{-10}$ | $2.16 \times 10^{-10}$ |
| (MA) <sub>2</sub> ·(SFA) <sub>3</sub> + MA  | $2.48 \times 10^{-10}$                      | $2.31 \times 10^{-10}$ | $2.14 \times 10^{-10}$ | $1.98 \times 10^{-10}$ |
| MA·SFA + MSA                                | $1.05 \times 10^{-10}$                      | $9.78 \times 10^{-11}$ | $9.08 \times 10^{-11}$ | $8.38 \times 10^{-11}$ |
| MSA·MA + SFA                                | $1.01 \times 10^{-10}$                      | $9.41 \times 10^{-11}$ | $8.74 \times 10^{-11}$ | $8.06 \times 10^{-11}$ |
| MSA·SFA + MA                                | $2.20 \times 10^{-10}$                      | $2.05 \times 10^{-10}$ | $1.91 \times 10^{-10}$ | $1.76 \times 10^{-10}$ |
| MSA·MA·SFA + MA                             | $2.19 \times 10^{-10}$                      | $2.05 \times 10^{-10}$ | $1.90 \times 10^{-10}$ | $1.75 \times 10^{-10}$ |
| MSA·MA·SFA + MSA                            | $1.03 \times 10^{-10}$                      | $9.57 \times 10^{-11}$ | $8.88 \times 10^{-11}$ | $8.19 \times 10^{-11}$ |

| Collisions                                      | $\beta$ (cm <sup>3</sup> ·s <sup>-1</sup> ) |                        |                        |                        |
|-------------------------------------------------|---------------------------------------------|------------------------|------------------------|------------------------|
|                                                 | 298.15 K                                    | 278.15 K               | 258.15 K               | 238.15 K               |
| (MSA) <sub>2</sub> ·MA + SFA                    | $9.59 \times 10^{-11}$                      | $8.95 \times 10^{-11}$ | $8.31 \times 10^{-11}$ | $7.66 \times 10^{-11}$ |
| (MSA) <sub>2</sub> ·SFA + MA                    | $2.17 \times 10^{-10}$                      | $2.03 \times 10^{-10}$ | $1.88 \times 10^{-10}$ | $1.73 \times 10^{-10}$ |
| MSA·(MA) <sub>2</sub> ·SFA + MSA                | $1.14 \times 10^{-10}$                      | $1.07 \times 10^{-10}$ | $9.91 \times 10^{-11}$ | $9.14 \times 10^{-11}$ |
| (MSA) <sub>2</sub> ·(MA) <sub>2</sub> + SFA     | $1.14 \times 10^{-10}$                      | $1.06 \times 10^{-10}$ | $9.83 \times 10^{-11}$ | $9.07 \times 10^{-11}$ |
| (MSA) <sub>2</sub> ·MA·SFA + MA                 | $2.80 \times 10^{-10}$                      | $2.61 \times 10^{-10}$ | $2.42 \times 10^{-10}$ | $2.23 \times 10^{-10}$ |
| (MSA) <sub>2</sub> ·(MA) <sub>2</sub> ·SFA + MA | $2.73 \times 10^{-10}$                      | $2.55 \times 10^{-10}$ | $2.37 \times 10^{-10}$ | $2.18 \times 10^{-10}$ |
| MA·(SFA) <sub>2</sub> + MSA                     | $1.00 \times 10^{-10}$                      | $9.34 \times 10^{-11}$ | $8.67 \times 10^{-11}$ | $7.99 \times 10^{-11}$ |
| MSA·MA·SFA + SFA                                | $9.39 \times 10^{-11}$                      | $8.76 \times 10^{-11}$ | $8.13 \times 10^{-11}$ | $7.50 \times 10^{-11}$ |
| MSA·(SFA) <sub>2</sub> + MA                     | $2.32 \times 10^{-10}$                      | $2.16 \times 10^{-10}$ | $2.01 \times 10^{-10}$ | $1.85 \times 10^{-10}$ |
| (MA) <sub>2</sub> ·(SFA) <sub>2</sub> + MSA     | $1.12 \times 10^{-10}$                      | $1.05 \times 10^{-10}$ | $9.72 \times 10^{-11}$ | $8.97 \times 10^{-11}$ |
| MSA·(MA) <sub>2</sub> ·SFA + SFA                | $1.05 \times 10^{-10}$                      | $9.83 \times 10^{-11}$ | $9.12 \times 10^{-11}$ | $8.42 \times 10^{-11}$ |
| MSA·MA·(SFA) <sub>2</sub> + MA                  | $6.02 \times 10^{-10}$                      | $5.61 \times 10^{-10}$ | $5.21 \times 10^{-10}$ | $4.81 \times 10^{-10}$ |
| MSA·(MA) <sub>2</sub> ·(SFA) <sub>2</sub> + MA  | $2.80 \times 10^{-10}$                      | $2.61 \times 10^{-10}$ | $2.43 \times 10^{-10}$ | $2.24 \times 10^{-10}$ |

229 **Table S9** Total evaporation coefficients ( $\sum \gamma$ , s<sup>-1</sup>) for each cluster in the present study

| Clusters                                   | $\sum \gamma$ , (s <sup>-1</sup> ) |                       |                       |                       |
|--------------------------------------------|------------------------------------|-----------------------|-----------------------|-----------------------|
|                                            | 298.15 K                           | 278.15 K              | 258.15 K              | 238.15 K              |
| MSA·MA                                     | $1.05 \times 10^5$                 | $1.43 \times 10^4$    | $1.43 \times 10^3$    | $9.62 \times 10^1$    |
| MSA·SFA                                    | $8.03 \times 10^4$                 | $1.02 \times 10^4$    | $9.35 \times 10^2$    | $5.72 \times 10^1$    |
| MA·SFA                                     | $9.48 \times 10^5$                 | $1.59 \times 10^5$    | $2.00 \times 10^4$    | $1.77 \times 10^3$    |
| (MSA) <sub>2</sub>                         | $1.22 \times 10^3$                 | $1.10 \times 10^2$    | $6.82 \times 10^0$    | $2.64 \times 10^{-1}$ |
| (SFA) <sub>2</sub>                         | $1.41 \times 10^5$                 | $1.84 \times 10^4$    | $1.73 \times 10^3$    | $1.09 \times 10^2$    |
| (MSA) <sub>2</sub> ·MA                     | $2.93 \times 10^0$                 | $1.44 \times 10^{-1}$ | $4.45 \times 10^{-3}$ | $7.66 \times 10^{-5}$ |
| (MSA) <sub>2</sub> ·(MA) <sub>2</sub>      | $1.90 \times 10^0$                 | $1.13 \times 10^{-1}$ | $4.33 \times 10^{-3}$ | $9.50 \times 10^{-5}$ |
| MA·(SFA) <sub>2</sub>                      | $4.77 \times 10^{-4}$              | $1.35 \times 10^{-5}$ | $2.20 \times 10^{-7}$ | $1.80 \times 10^{-9}$ |
| (MA) <sub>2</sub> ·(SFA) <sub>2</sub>      | $1.72 \times 10^8$                 | $4.27 \times 10^7$    | $8.45 \times 10^6$    | $1.26 \times 10^6$    |
| (MSA) <sub>2</sub> ·SFA                    | $4.70 \times 10^9$                 | $1.01 \times 10^9$    | $1.71 \times 10^8$    | $2.15 \times 10^7$    |
| MSA·(SFA) <sub>2</sub>                     | $1.70 \times 10^7$                 | $2.66 \times 10^6$    | $3.12 \times 10^5$    | $2.54 \times 10^4$    |
| (MSA) <sub>3</sub>                         | $1.89 \times 10^7$                 | $2.77 \times 10^6$    | $3.01 \times 10^5$    | $2.23 \times 10^4$    |
| (SFA) <sub>3</sub>                         | $2.37 \times 10^{11}$              | $8.47 \times 10^{10}$ | $2.55 \times 10^{10}$ | $6.20 \times 10^9$    |
| (MSA) <sub>3</sub> ·MA                     | $5.28 \times 10^2$                 | $4.00 \times 10^1$    | $2.01 \times 10^0$    | $6.10 \times 10^{-2}$ |
| (MSA) <sub>3</sub> ·(MA) <sub>2</sub>      | $1.45 \times 10^0$                 | $7.30 \times 10^{-2}$ | $2.30 \times 10^{-3}$ | $4.04 \times 10^{-5}$ |
| (MSA) <sub>3</sub> ·(MA) <sub>3</sub>      | $5.41 \times 10^0$                 | $2.18 \times 10^{-1}$ | $5.32 \times 10^{-3}$ | $6.89 \times 10^{-5}$ |
| MA·(SFA) <sub>3</sub>                      | $1.74 \times 10^5$                 | $1.36 \times 10^4$    | $7.16 \times 10^2$    | $2.28 \times 10^1$    |
| (MA) <sub>2</sub> ·(SFA) <sub>3</sub>      | $1.22 \times 10^0$                 | $6.30 \times 10^{-2}$ | $2.06 \times 10^{-3}$ | $3.87 \times 10^{-5}$ |
| (MA) <sub>3</sub> ·(SFA) <sub>3</sub>      | $2.61 \times 10^9$                 | $3.62 \times 10^8$    | $3.69 \times 10^7$    | $2.55 \times 10^6$    |
| MSA·MA·SFA                                 | $2.96 \times 10^0$                 | $1.49 \times 10^{-1}$ | $4.68 \times 10^{-3}$ | $8.23 \times 10^{-5}$ |
| MSA·(MA) <sub>2</sub> ·SFA                 | $3.32 \times 10^3$                 | $2.77 \times 10^2$    | $1.56 \times 10^1$    | $5.39 \times 10^{-1}$ |
| MSA <sub>2</sub> ·MA·SFA                   | $6.23 \times 10^7$                 | $1.12 \times 10^7$    | $1.55 \times 10^6$    | $1.52 \times 10^5$    |
| (MSA) <sub>2</sub> ·(MA) <sub>2</sub> ·SFA | $4.97 \times 10^1$                 | $2.53 \times 10^0$    | $8.06 \times 10^{-2}$ | $1.43 \times 10^{-3}$ |
| (MSA) <sub>2</sub> ·(MA) <sub>3</sub> ·SFA | $1.43 \times 10^2$                 | $1.42 \times 10^1$    | $9.83 \times 10^{-1}$ | $4.29 \times 10^{-2}$ |
| MSA·MA·(SFA) <sub>2</sub>                  | $1.21 \times 10^4$                 | $9.41 \times 10^2$    | $4.88 \times 10^1$    | $1.52 \times 10^0$    |
| MSA·(MA) <sub>2</sub> ·(SFA) <sub>2</sub>  | $9.77 \times 10^{-1}$              | $4.92 \times 10^{-2}$ | $1.58 \times 10^{-3}$ | $2.87 \times 10^{-5}$ |
| MSA·(MA) <sub>3</sub> ·(SFA) <sub>2</sub>  | $5.53 \times 10^2$                 | $5.38 \times 10^1$    | $3.67 \times 10^0$    | $1.60 \times 10^{-1}$ |

**Table S10** Ratios ( $\beta \cdot C / \Sigma \gamma$ ) between monomer molecule collisions and evaporation coefficients for each cluster involving SFA in the present study ( $[\text{MSA}] = 1.0 \times 10^7 \text{ molecules} \cdot \text{cm}^{-3}$ ,  $[\text{MA}] = 2.5 \times 10^7 \text{ molecules} \cdot \text{cm}^{-3}$ ,  $[\text{SFA}] = 1.0 \times 10^7 \text{ molecules} \cdot \text{cm}^{-3}$ )

|                                                       |  | $(\beta \cdot C / \Sigma \gamma)$ |                        |                        |                        |
|-------------------------------------------------------|--|-----------------------------------|------------------------|------------------------|------------------------|
| Clusters                                              |  | 298.15 K                          | 278.15 K               | 258.15 K               | 238.15 K               |
| Collision with MSA monomer: $C = [\text{MSA}]$        |  |                                   |                        |                        |                        |
| MSA·MA                                                |  | $1.05 \times 10^{-14}$            | $7.21 \times 10^{-14}$ | $6.72 \times 10^{-13}$ | $9.19 \times 10^{-12}$ |
| MSA·SFA                                               |  | $1.32 \times 10^{-14}$            | $9.71 \times 10^{-14}$ | $9.81 \times 10^{-13}$ | $1.48 \times 10^{-11}$ |
| MA·SFA                                                |  | $1.11 \times 10^{-15}$            | $6.17 \times 10^{-15}$ | $4.54 \times 10^{-14}$ | $4.73 \times 10^{-13}$ |
| $(\text{MSA})_2$                                      |  | $8.82 \times 10^{-13}$            | $9.11 \times 10^{-12}$ | $1.36 \times 10^{-10}$ | $3.25 \times 10^{-9}$  |
| $(\text{SFA})_2$                                      |  | $7.38 \times 10^{-15}$            | $5.30 \times 10^{-14}$ | $5.22 \times 10^{-13}$ | $7.65 \times 10^{-12}$ |
| $(\text{MSA})_2 \cdot \text{MA}$                      |  | $3.58 \times 10^{-10}$            | $6.77 \times 10^{-9}$  | $2.04 \times 10^{-7}$  | $1.09 \times 10^{-5}$  |
| $(\text{MSA})_2 \cdot (\text{MA})_2$                  |  | $6.48 \times 10^{-10}$            | $1.01 \times 10^{-8}$  | $2.46 \times 10^{-7}$  | $1.03 \times 10^{-5}$  |
| $\text{MA} \cdot (\text{SFA})_2$                      |  | $2.10 \times 10^{-6}$             | $6.92 \times 10^{-5}$  | $3.94 \times 10^{-3}$  | $4.43 \times 10^{-1}$  |
| $(\text{MA})_2 \cdot (\text{SFA})_2$                  |  | $6.52 \times 10^{-18}$            | $2.45 \times 10^{-17}$ | $1.15 \times 10^{-16}$ | $7.09 \times 10^{-16}$ |
| MSA·MA·SFA                                            |  | $3.46 \times 10^{-10}$            | $6.44 \times 10^{-9}$  | $1.90 \times 10^{-7}$  | $9.96 \times 10^{-6}$  |
| MSA· $(\text{MA})_2 \cdot \text{SFA}$                 |  | $3.45 \times 10^{-13}$            | $3.86 \times 10^{-12}$ | $6.36 \times 10^{-11}$ | $1.69 \times 10^{-9}$  |
| Collision with MA monomer: $C = [\text{MA}]$          |  |                                   |                        |                        |                        |
| MSA·SFA                                               |  | $6.85 \times 10^{-13}$            | $5.04 \times 10^{-12}$ | $5.09 \times 10^{-11}$ | $7.69 \times 10^{-10}$ |
| $(\text{MSA})_2$                                      |  | $4.58 \times 10^{-11}$            | $4.73 \times 10^{-10}$ | $7.08 \times 10^{-9}$  | $1.69 \times 10^{-7}$  |
| $(\text{SFA})_2$                                      |  | $3.83 \times 10^{-13}$            | $2.75 \times 10^{-12}$ | $2.71 \times 10^{-11}$ | $3.97 \times 10^{-10}$ |
| $(\text{MSA})_2 \cdot \text{MA}$                      |  | $1.91 \times 10^{-8}$             | $3.62 \times 10^{-7}$  | $1.09 \times 10^{-5}$  | $5.84 \times 10^{-4}$  |
| $\text{MA} \cdot (\text{SFA})_2$                      |  | $1.12 \times 10^{-4}$             | $3.69 \times 10^{-3}$  | $2.10 \times 10^{-1}$  | $2.37 \times 10^1$     |
| $(\text{MSA})_2 \cdot \text{SFA}$                     |  | $1.16 \times 10^{-17}$            | $5.02 \times 10^{-17}$ | $2.75 \times 10^{-16}$ | $2.01 \times 10^{-15}$ |
| MSA· $(\text{SFA})_2$                                 |  | $3.41 \times 10^{-15}$            | $2.03 \times 10^{-14}$ | $1.61 \times 10^{-13}$ | $1.82 \times 10^{-12}$ |
| $(\text{MSA})_3$                                      |  | $2.76 \times 10^{-15}$            | $1.76 \times 10^{-14}$ | $1.50 \times 10^{-13}$ | $1.87 \times 10^{-12}$ |
| $(\text{SFA})_3$                                      |  | $2.38 \times 10^{-19}$            | $6.23 \times 10^{-19}$ | $1.92 \times 10^{-18}$ | $7.28 \times 10^{-18}$ |
| $(\text{MSA})_3 \cdot \text{MA}$                      |  | $1.10 \times 10^{-10}$            | $1.35 \times 10^{-9}$  | $2.49 \times 10^{-8}$  | $7.59 \times 10^{-7}$  |
| $(\text{MSA})_3 \cdot (\text{MA})_2$                  |  | $4.69 \times 10^{-8}$             | $8.68 \times 10^{-7}$  | $2.55 \times 10^{-5}$  | $1.34 \times 10^{-3}$  |
| $\text{MA} \cdot (\text{SFA})_3$                      |  | $3.88 \times 10^{-13}$            | $4.63 \times 10^{-12}$ | $8.16 \times 10^{-11}$ | $2.36 \times 10^{-9}$  |
| $(\text{MA})_2 \cdot (\text{SFA})_3$                  |  | $5.06 \times 10^{-8}$             | $9.16 \times 10^{-7}$  | $2.60 \times 10^{-5}$  | $1.28 \times 10^{-3}$  |
| MSA·MA·SFA                                            |  | $1.85 \times 10^{-8}$             | $3.44 \times 10^{-7}$  | $1.01 \times 10^{-5}$  | $5.32 \times 10^{-4}$  |
| $(\text{MSA})_2 \cdot \text{MA} \cdot \text{SFA}$     |  | $1.12 \times 10^{-15}$            | $5.80 \times 10^{-15}$ | $3.91 \times 10^{-14}$ | $3.67 \times 10^{-13}$ |
| $(\text{MSA})_2 \cdot (\text{MA})_2 \cdot \text{SFA}$ |  | $1.38 \times 10^{-9}$             | $2.52 \times 10^{-8}$  | $7.34 \times 10^{-7}$  | $3.81 \times 10^{-5}$  |
| MSA·MA· $(\text{SFA})_2$                              |  | $4.49 \times 10^{-12}$            | $5.40 \times 10^{-11}$ | $9.67 \times 10^{-10}$ | $2.85 \times 10^{-8}$  |
| MSA· $(\text{MA})_2 \cdot (\text{SFA})_2$             |  | $7.17 \times 10^{-8}$             | $1.33 \times 10^{-6}$  | $3.85 \times 10^{-5}$  | $1.95 \times 10^{-3}$  |
| Collision with SFA monomer: $C = [\text{SFA}]$        |  |                                   |                        |                        |                        |
| MSA·MA                                                |  | $9.60 \times 10^{-15}$            | $6.58 \times 10^{-14}$ | $6.13 \times 10^{-13}$ | $8.38 \times 10^{-12}$ |
| MSA·SFA                                               |  | $1.21 \times 10^{-14}$            | $8.89 \times 10^{-14}$ | $8.98 \times 10^{-13}$ | $1.36 \times 10^{-11}$ |



| Clusters                              | $(\beta \cdot C / \Sigma \gamma)$ |                        |                        |                        |
|---------------------------------------|-----------------------------------|------------------------|------------------------|------------------------|
|                                       | 298.15 K                          | 278.15 K               | 258.15 K               | 238.15 K               |
| MA·SFA                                | $1.01 \times 10^{-15}$            | $5.61 \times 10^{-15}$ | $4.13 \times 10^{-14}$ | $4.30 \times 10^{-13}$ |
| (MSA) <sub>2</sub>                    | $8.07 \times 10^{-13}$            | $8.34 \times 10^{-12}$ | $1.25 \times 10^{-10}$ | $2.98 \times 10^{-9}$  |
| (SFA) <sub>2</sub>                    | $6.75 \times 10^{-15}$            | $4.84 \times 10^{-14}$ | $4.78 \times 10^{-13}$ | $6.99 \times 10^{-12}$ |
| (MSA) <sub>2</sub> ·MA                | $3.28 \times 10^{-10}$            | $6.21 \times 10^{-9}$  | $1.87 \times 10^{-7}$  | $1.00 \times 10^{-5}$  |
| (MSA) <sub>2</sub> ·(MA) <sub>2</sub> | $5.98 \times 10^{-10}$            | $9.35 \times 10^{-9}$  | $2.27 \times 10^{-7}$  | $9.55 \times 10^{-6}$  |
| MA·(SFA) <sub>2</sub>                 | $1.92 \times 10^{-6}$             | $6.33 \times 10^{-5}$  | $3.60 \times 10^{-3}$  | $4.05 \times 10^{-1}$  |
| (MA) <sub>2</sub> ·(SFA) <sub>2</sub> | $6.00 \times 10^{-18}$            | $2.26 \times 10^{-17}$ | $1.06 \times 10^{-16}$ | $6.53 \times 10^{-16}$ |
| MSA·MA·SFA                            | $3.17 \times 10^{-10}$            | $5.90 \times 10^{-9}$  | $1.74 \times 10^{-7}$  | $9.12 \times 10^{-6}$  |
| MSA·(MA) <sub>2</sub> ·SFA            | $3.18 \times 10^{-13}$            | $3.55 \times 10^{-12}$ | $5.85 \times 10^{-11}$ | $1.56 \times 10^{-9}$  |

234

235  
236

**Table S11** The formation rate  $J$  of MSA at the conditions of  $T = 238.15$  K,  $[\text{MSA}] = 10^6$ - $10^8$  molecules $\cdot\text{cm}^{-3}$ ,  $[\text{MA}] = 10^7$ - $10^{11}$  molecules $\cdot\text{cm}^{-3}$ , and  $[\text{SFA}] = 0, 10^8$ - $10^{12}$  molecules $\cdot\text{cm}^{-3}$ . MSA, MA and SFA represent sulfuric acid, ammonia and formic acid, respectively

| [MSA]          | [MA]                     | [SFA] = 0             | [SFA] = $10^4$        | [SFA] = $10^5$        | [SFA] = $10^6$        | [SFA] = $10^7$        | [SFA] = $10^8$        |
|----------------|--------------------------|-----------------------|-----------------------|-----------------------|-----------------------|-----------------------|-----------------------|
| [MSA] = $10^5$ | [MA] = $2.5 \times 10^7$ | $3.54 \times 10^{-9}$ | $4.80 \times 10^{-9}$ | $1.62 \times 10^{-8}$ | $1.30 \times 10^{-7}$ | $1.22 \times 10^{-6}$ | $8.69 \times 10^{-6}$ |
| [MSA] = $10^5$ | [MA] = $2.5 \times 10^8$ | $4.27 \times 10^{-7}$ | $5.34 \times 10^{-7}$ | $1.49 \times 10^{-6}$ | $1.10 \times 10^{-5}$ | $1.02 \times 10^{-4}$ | $7.26 \times 10^{-4}$ |
| [MSA] = $10^5$ | [MA] = $2.5 \times 10^9$ | $3.47 \times 10^{-6}$ | $4.21 \times 10^{-6}$ | $1.08 \times 10^{-5}$ | $7.60 \times 10^{-5}$ | $6.78 \times 10^{-4}$ | $5.23 \times 10^{-3}$ |
| [MSA] = $10^6$ | [MA] = $2.5 \times 10^7$ | $3.48 \times 10^{-5}$ | $3.61 \times 10^{-5}$ | $4.71 \times 10^{-5}$ | $1.58 \times 10^{-4}$ | $1.22 \times 10^{-3}$ | $8.64 \times 10^{-3}$ |
| [MSA] = $10^6$ | [MA] = $2.5 \times 10^8$ | $4.19 \times 10^{-3}$ | $4.29 \times 10^{-3}$ | $5.22 \times 10^{-3}$ | $1.45 \times 10^{-2}$ | $1.04 \times 10^{-1}$ | $7.20 \times 10^{-1}$ |
| [MSA] = $10^6$ | [MA] = $2.5 \times 10^9$ | $3.40 \times 10^{-2}$ | $3.47 \times 10^{-2}$ | $4.11 \times 10^{-2}$ | $1.04 \times 10^{-1}$ | $6.90 \times 10^{-1}$ | $5.14 \times 10^0$    |
| [MSA] = $10^7$ | [MA] = $2.5 \times 10^7$ | $3.01 \times 10^{-1}$ | $3.02 \times 10^{-1}$ | $3.11 \times 10^{-1}$ | $3.97 \times 10^{-1}$ | $1.24 \times 10^0$    | $8.08 \times 10^0$    |
| [MSA] = $10^7$ | [MA] = $2.5 \times 10^8$ | $3.47 \times 10^1$    | $3.48 \times 10^1$    | $3.55 \times 10^1$    | $4.28 \times 10^1$    | $1.14 \times 10^2$    | $6.53 \times 10^2$    |
| [MSA] = $10^7$ | [MA] = $2.5 \times 10^9$ | $2.72 \times 10^2$    | $2.73 \times 10^2$    | $2.78 \times 10^2$    | $3.26 \times 10^2$    | $7.74 \times 10^2$    | $4.31 \times 10^3$    |
| [MSA] = $10^8$ | [MA] = $2.5 \times 10^7$ | $1.14 \times 10^3$    | $1.14 \times 10^3$    | $1.14 \times 10^3$    | $1.17 \times 10^3$    | $1.44 \times 10^3$    | $4.98 \times 10^3$    |
| [MSA] = $10^8$ | [MA] = $2.5 \times 10^8$ | $9.01 \times 10^4$    | $9.01 \times 10^4$    | $9.02 \times 10^4$    | $9.19 \times 10^4$    | $1.08 \times 10^5$    | $2.64 \times 10^5$    |
| [MSA] = $10^8$ | [MA] = $2.5 \times 10^9$ | $5.34 \times 10^5$    | $5.34 \times 10^5$    | $5.35 \times 10^5$    | $5.42 \times 10^5$    | $6.12 \times 10^5$    | $1.23 \times 10^6$    |
| [MSA] = $10^9$ | [MA] = $2.5 \times 10^7$ | $6.99 \times 10^5$    | $6.99 \times 10^5$    | $7.00 \times 10^5$    | $7.02 \times 10^5$    | $7.30 \times 10^5$    | $9.89 \times 10^5$    |
| [MSA] = $10^9$ | [MA] = $2.5 \times 10^8$ | $1.66 \times 10^7$    | $1.66 \times 10^7$    | $1.66 \times 10^7$    | $1.67 \times 10^7$    | $1.69 \times 10^7$    | $1.97 \times 10^7$    |
| [MSA] = $10^9$ | [MA] = $2.5 \times 10^9$ | $9.54 \times 10^7$    | $9.54 \times 10^7$    | $9.54 \times 10^7$    | $9.55 \times 10^7$    | $9.65 \times 10^7$    | $1.06 \times 10^8$    |

237

238  
239

**Table S12** The formation rate  $J$  of MSA at the conditions of  $T = 258.15$  K,  $[\text{MSA}] = 10^6$ - $10^8$  molecules $\cdot\text{cm}^{-3}$ ,  $[\text{MA}] = 10^7$ - $10^{11}$  molecules $\cdot\text{cm}^{-3}$ , and  $[\text{SFA}] = 0, 10^8$ - $10^{12}$  molecules $\cdot\text{cm}^{-3}$ . MSA, MA and SFA represent sulfuric acid, ammonia and formic acid, respectively

| [MSA]          | [MA]                     | [SFA] = 0              | [SFA] = $10^4$         | [SFA] = $10^5$         | [SFA] = $10^6$         | [SFA] = $10^7$        | [SFA] = $10^8$        |
|----------------|--------------------------|------------------------|------------------------|------------------------|------------------------|-----------------------|-----------------------|
| [MSA] = $10^5$ | [MA] = $2.5 \times 10^7$ | $2.63 \times 10^{-12}$ | $5.59 \times 10^{-12}$ | $3.22 \times 10^{-11}$ | $2.98 \times 10^{-10}$ | $2.96 \times 10^{-9}$ | $2.43 \times 10^{-8}$ |
| [MSA] = $10^5$ | [MA] = $2.5 \times 10^8$ | $9.62 \times 10^{-10}$ | $1.87 \times 10^{-9}$  | $1.00 \times 10^{-8}$  | $9.19 \times 10^{-8}$  | $9.18 \times 10^{-7}$ | $7.97 \times 10^{-6}$ |
| [MSA] = $10^5$ | [MA] = $2.5 \times 10^9$ | $1.02 \times 10^{-7}$  | $1.47 \times 10^{-7}$  | $5.60 \times 10^{-7}$  | $4.68 \times 10^{-6}$  | $4.48 \times 10^{-5}$ | $3.31 \times 10^{-4}$ |
| [MSA] = $10^6$ | [MA] = $2.5 \times 10^7$ | $2.61 \times 10^{-8}$  | $2.90 \times 10^{-8}$  | $5.52 \times 10^{-8}$  | $3.17 \times 10^{-7}$  | $2.93 \times 10^{-6}$ | $2.40 \times 10^{-5}$ |
| [MSA] = $10^6$ | [MA] = $2.5 \times 10^8$ | $9.54 \times 10^{-6}$  | $1.04 \times 10^{-5}$  | $1.84 \times 10^{-5}$  | $9.88 \times 10^{-5}$  | $9.10 \times 10^{-4}$ | $7.86 \times 10^{-3}$ |
| [MSA] = $10^6$ | [MA] = $2.5 \times 10^9$ | $1.00 \times 10^{-3}$  | $1.05 \times 10^{-3}$  | $1.45 \times 10^{-3}$  | $5.49 \times 10^{-3}$  | $4.48 \times 10^{-2}$ | $3.28 \times 10^{-1}$ |
| [MSA] = $10^7$ | [MA] = $2.5 \times 10^7$ | $2.44 \times 10^{-4}$  | $2.47 \times 10^{-4}$  | $2.69 \times 10^{-4}$  | $4.93 \times 10^{-4}$  | $2.73 \times 10^{-3}$ | $2.12 \times 10^{-2}$ |
| [MSA] = $10^7$ | [MA] = $2.5 \times 10^8$ | $8.75 \times 10^{-2}$  | $8.83 \times 10^{-2}$  | $9.50 \times 10^{-2}$  | $1.63 \times 10^{-1}$  | $8.47 \times 10^{-1}$ | $6.90 \times 10^0$    |
| [MSA] = $10^7$ | [MA] = $2.5 \times 10^9$ | $8.89 \times 10^0$     | $8.92 \times 10^0$     | $9.26 \times 10^0$     | $1.26 \times 10^1$     | $4.53 \times 10^1$    | $2.94 \times 10^2$    |
| [MSA] = $10^8$ | [MA] = $2.5 \times 10^7$ | $1.52 \times 10^0$     | $1.52 \times 10^0$     | $1.53 \times 10^0$     | $1.61 \times 10^0$     | $2.41 \times 10^0$    | $9.90 \times 10^0$    |
| [MSA] = $10^8$ | [MA] = $2.5 \times 10^8$ | $4.80 \times 10^2$     | $4.80 \times 10^2$     | $4.83 \times 10^2$     | $5.06 \times 10^2$     | $7.41 \times 10^2$    | $3.17 \times 10^3$    |
| [MSA] = $10^8$ | [MA] = $2.5 \times 10^9$ | $3.46 \times 10^4$     | $3.46 \times 10^4$     | $3.47 \times 10^4$     | $3.57 \times 10^4$     | $4.52 \times 10^4$    | $1.35 \times 10^5$    |
| [MSA] = $10^9$ | [MA] = $2.5 \times 10^7$ | $4.61 \times 10^3$     | $4.61 \times 10^3$     | $4.61 \times 10^3$     | $4.63 \times 10^3$     | $4.83 \times 10^3$    | $6.79 \times 10^3$    |
| [MSA] = $10^9$ | [MA] = $2.5 \times 10^8$ | $6.06 \times 10^5$     | $6.06 \times 10^5$     | $6.06 \times 10^5$     | $6.09 \times 10^5$     | $6.32 \times 10^5$    | $8.51 \times 10^5$    |
| [MSA] = $10^9$ | [MA] = $2.5 \times 10^9$ | $1.32 \times 10^7$     | $1.32 \times 10^7$     | $1.32 \times 10^7$     | $1.33 \times 10^7$     | $1.36 \times 10^7$    | $1.69 \times 10^7$    |

240

241 **Table S13** The formation rate  $J$  of MSA at the conditions of  $T = 278.15$  K,  $[\text{MSA}] = 10^6$ - $10^8$  molecules $\cdot\text{cm}^{-3}$ ,  $[\text{MA}] = 10^7$ - $10^{11}$  molecules $\cdot\text{cm}^{-3}$ , and  $[\text{SFA}] = 0, 10^8$ - $10^{12}$   
 242 molecules $\cdot\text{cm}^{-3}$ . MSA, MA and SFA represent sulfuric acid, ammonia and formic acid, respectively

| [MSA]          | [MA]                     | [SFA] = 0              | [SFA] = $10^4$         | [SFA] = $10^5$         | [SFA] = $10^6$         | [SFA] = $10^7$         | [SFA] = $10^8$         |
|----------------|--------------------------|------------------------|------------------------|------------------------|------------------------|------------------------|------------------------|
| [MSA] = $10^5$ | [MA] = $2.5 \times 10^7$ | $1.68 \times 10^{-17}$ | $3.26 \times 10^{-17}$ | $1.75 \times 10^{-16}$ | $1.60 \times 10^{-15}$ | $1.59 \times 10^{-14}$ | $1.65 \times 10^{-13}$ |
| [MSA] = $10^5$ | [MA] = $2.5 \times 10^8$ | $1.67 \times 10^{-14}$ | $3.21 \times 10^{-14}$ | $1.71 \times 10^{-13}$ | $1.56 \times 10^{-12}$ | $1.54 \times 10^{-11}$ | $1.56 \times 10^{-10}$ |
| [MSA] = $10^5$ | [MA] = $2.5 \times 10^9$ | $1.53 \times 10^{-11}$ | $2.74 \times 10^{-11}$ | $1.36 \times 10^{-10}$ | $1.22 \times 10^{-9}$  | $1.21 \times 10^{-8}$  | $1.22 \times 10^{-7}$  |
| [MSA] = $10^6$ | [MA] = $2.5 \times 10^7$ | $1.68 \times 10^{-13}$ | $1.84 \times 10^{-13}$ | $3.26 \times 10^{-13}$ | $1.75 \times 10^{-12}$ | $1.60 \times 10^{-11}$ | $1.65 \times 10^{-10}$ |
| [MSA] = $10^6$ | [MA] = $2.5 \times 10^8$ | $1.67 \times 10^{-10}$ | $1.82 \times 10^{-10}$ | $3.21 \times 10^{-10}$ | $1.71 \times 10^{-9}$  | $1.56 \times 10^{-8}$  | $1.57 \times 10^{-7}$  |
| [MSA] = $10^6$ | [MA] = $2.5 \times 10^9$ | $1.53 \times 10^{-7}$  | $1.65 \times 10^{-7}$  | $2.74 \times 10^{-7}$  | $1.36 \times 10^{-6}$  | $1.22 \times 10^{-5}$  | $1.22 \times 10^{-4}$  |
| [MSA] = $10^7$ | [MA] = $2.5 \times 10^7$ | $1.68 \times 10^{-9}$  | $1.70 \times 10^{-9}$  | $1.84 \times 10^{-9}$  | $3.25 \times 10^{-9}$  | $1.74 \times 10^{-8}$  | $1.67 \times 10^{-7}$  |
| [MSA] = $10^7$ | [MA] = $2.5 \times 10^8$ | $1.67 \times 10^{-6}$  | $1.69 \times 10^{-6}$  | $1.82 \times 10^{-6}$  | $3.19 \times 10^{-6}$  | $1.69 \times 10^{-5}$  | $1.57 \times 10^{-4}$  |
| [MSA] = $10^7$ | [MA] = $2.5 \times 10^9$ | $1.53 \times 10^{-3}$  | $1.54 \times 10^{-3}$  | $1.65 \times 10^{-3}$  | $2.72 \times 10^{-3}$  | $1.34 \times 10^{-2}$  | $1.22 \times 10^{-1}$  |
| [MSA] = $10^8$ | [MA] = $2.5 \times 10^7$ | $1.69 \times 10^{-5}$  | $1.69 \times 10^{-5}$  | $1.70 \times 10^{-5}$  | $1.83 \times 10^{-5}$  | $3.12 \times 10^{-5}$  | $1.72 \times 10^{-4}$  |
| [MSA] = $10^8$ | [MA] = $2.5 \times 10^8$ | $1.68 \times 10^{-2}$  | $1.68 \times 10^{-2}$  | $1.69 \times 10^{-2}$  | $1.82 \times 10^{-2}$  | $3.07 \times 10^{-2}$  | $1.62 \times 10^{-1}$  |
| [MSA] = $10^8$ | [MA] = $2.5 \times 10^9$ | $1.54 \times 10^1$     | $1.54 \times 10^1$     | $1.55 \times 10^1$     | $1.64 \times 10^1$     | $2.59 \times 10^1$     | $1.22 \times 10^2$     |
| [MSA] = $10^9$ | [MA] = $2.5 \times 10^7$ | $1.75 \times 10^{-1}$  | $1.75 \times 10^{-1}$  | $1.75 \times 10^{-1}$  | $1.76 \times 10^{-1}$  | $1.84 \times 10^{-1}$  | $2.72 \times 10^{-1}$  |
| [MSA] = $10^9$ | [MA] = $2.5 \times 10^8$ | $1.78 \times 10^2$     | $1.78 \times 10^2$     | $1.78 \times 10^2$     | $1.79 \times 10^2$     | $1.86 \times 10^2$     | $2.68 \times 10^2$     |
| [MSA] = $10^9$ | [MA] = $2.5 \times 10^9$ | $1.30 \times 10^5$     | $1.30 \times 10^5$     | $1.30 \times 10^5$     | $1.31 \times 10^5$     | $1.34 \times 10^5$     | $1.73 \times 10^5$     |

243

244  
245

**Table S14** The formation rate  $J$  of MSA at the conditions of  $T = 298.15$  K,  $[\text{MSA}] = 10^6$ - $10^8$  molecules $\cdot\text{cm}^{-3}$ ,  $[\text{MA}] = 10^7$ - $10^{11}$  molecules $\cdot\text{cm}^{-3}$ , and  $[\text{SFA}] = 0, 10^8$ - $10^{12}$  molecules $\cdot\text{cm}^{-3}$ . MSA, MA and SFA represent sulfuric acid, ammonia and formic acid, respectively

| [MSA]          | [MA]                     | [SFA] = 0              | [SFA] = $10^4$         | [SFA] = $10^5$         | [SFA] = $10^6$         | [SFA] = $10^7$         | [SFA] = $10^8$         |
|----------------|--------------------------|------------------------|------------------------|------------------------|------------------------|------------------------|------------------------|
| [MSA] = $10^5$ | [MA] = $2.5 \times 10^7$ | $2.62 \times 10^{-23}$ | $4.79 \times 10^{-23}$ | $2.43 \times 10^{-22}$ | $2.20 \times 10^{-21}$ | $2.21 \times 10^{-20}$ | $2.58 \times 10^{-19}$ |
| [MSA] = $10^5$ | [MA] = $2.5 \times 10^8$ | $2.62 \times 10^{-20}$ | $4.79 \times 10^{-20}$ | $2.43 \times 10^{-19}$ | $2.20 \times 10^{-18}$ | $2.20 \times 10^{-17}$ | $2.52 \times 10^{-16}$ |
| [MSA] = $10^5$ | [MA] = $2.5 \times 10^9$ | $2.68 \times 10^{-17}$ | $4.85 \times 10^{-17}$ | $2.44 \times 10^{-16}$ | $2.20 \times 10^{-15}$ | $2.18 \times 10^{-14}$ | $2.31 \times 10^{-13}$ |
| [MSA] = $10^6$ | [MA] = $2.5 \times 10^7$ | $2.62 \times 10^{-19}$ | $2.83 \times 10^{-19}$ | $4.79 \times 10^{-19}$ | $2.44 \times 10^{-18}$ | $2.23 \times 10^{-17}$ | $2.58 \times 10^{-16}$ |
| [MSA] = $10^6$ | [MA] = $2.5 \times 10^8$ | $2.62 \times 10^{-16}$ | $2.84 \times 10^{-16}$ | $4.79 \times 10^{-16}$ | $2.44 \times 10^{-15}$ | $2.23 \times 10^{-14}$ | $2.52 \times 10^{-13}$ |
| [MSA] = $10^6$ | [MA] = $2.5 \times 10^9$ | $2.68 \times 10^{-13}$ | $2.90 \times 10^{-13}$ | $4.85 \times 10^{-13}$ | $2.44 \times 10^{-12}$ | $2.21 \times 10^{-11}$ | $2.31 \times 10^{-10}$ |
| [MSA] = $10^7$ | [MA] = $2.5 \times 10^7$ | $2.62 \times 10^{-15}$ | $2.64 \times 10^{-15}$ | $2.83 \times 10^{-15}$ | $4.79 \times 10^{-15}$ | $2.46 \times 10^{-14}$ | $2.58 \times 10^{-13}$ |
| [MSA] = $10^7$ | [MA] = $2.5 \times 10^8$ | $2.62 \times 10^{-12}$ | $2.64 \times 10^{-12}$ | $2.84 \times 10^{-12}$ | $4.79 \times 10^{-12}$ | $2.46 \times 10^{-11}$ | $2.52 \times 10^{-10}$ |
| [MSA] = $10^7$ | [MA] = $2.5 \times 10^9$ | $2.68 \times 10^{-9}$  | $2.71 \times 10^{-9}$  | $2.90 \times 10^{-9}$  | $4.85 \times 10^{-9}$  | $2.45 \times 10^{-8}$  | $2.32 \times 10^{-7}$  |
| [MSA] = $10^8$ | [MA] = $2.5 \times 10^7$ | $2.62 \times 10^{-11}$ | $2.62 \times 10^{-11}$ | $2.64 \times 10^{-11}$ | $2.84 \times 10^{-11}$ | $4.80 \times 10^{-11}$ | $2.71 \times 10^{-10}$ |
| [MSA] = $10^8$ | [MA] = $2.5 \times 10^8$ | $2.63 \times 10^{-8}$  | $2.63 \times 10^{-8}$  | $2.65 \times 10^{-8}$  | $2.84 \times 10^{-8}$  | $4.81 \times 10^{-8}$  | $2.66 \times 10^{-7}$  |
| [MSA] = $10^8$ | [MA] = $2.5 \times 10^9$ | $2.69 \times 10^{-5}$  | $2.69 \times 10^{-5}$  | $2.71 \times 10^{-5}$  | $2.90 \times 10^{-5}$  | $4.85 \times 10^{-5}$  | $2.52 \times 10^{-4}$  |
| [MSA] = $10^9$ | [MA] = $2.5 \times 10^7$ | $2.65 \times 10^{-7}$  | $2.65 \times 10^{-7}$  | $2.65 \times 10^{-7}$  | $2.67 \times 10^{-7}$  | $2.86 \times 10^{-7}$  | $4.84 \times 10^{-7}$  |
| [MSA] = $10^9$ | [MA] = $2.5 \times 10^8$ | $2.66 \times 10^{-4}$  | $2.66 \times 10^{-4}$  | $2.66 \times 10^{-4}$  | $2.68 \times 10^{-4}$  | $2.87 \times 10^{-4}$  | $4.83 \times 10^{-4}$  |
| [MSA] = $10^9$ | [MA] = $2.5 \times 10^9$ | $2.73 \times 10^{-1}$  | $2.73 \times 10^{-1}$  | $2.73 \times 10^{-1}$  | $2.75 \times 10^{-1}$  | $2.94 \times 10^{-1}$  | $4.85 \times 10^{-1}$  |

246

**Table S15** Cartesian coordinates of all molecules and clusters in the studied system

**MSA:**

| Atoms | X           | Y           | Z           |
|-------|-------------|-------------|-------------|
| S     | 0.08625500  | 0.13875900  | 0.06729200  |
| O     | 0.20786800  | 1.40372500  | -0.58037200 |
| O     | 0.60516400  | -0.08599700 | 1.38677800  |
| O     | 0.76916500  | -0.95690500 | -0.88879000 |
| H     | 1.34875900  | -1.50079600 | -0.34066100 |
| C     | -1.60359500 | -0.37243200 | -0.00520600 |
| H     | -2.16873100 | 0.34875600  | 0.57873100  |
| H     | -1.91343000 | -0.35301000 | -1.04542600 |
| H     | -1.68268700 | -1.36709600 | 0.42100400  |

**MA:**

| Atoms | X           | Y           | Z           |
|-------|-------------|-------------|-------------|
| H     | -0.44173500 | -1.10950800 | 0.81057800  |
| N     | 0.04994100  | -0.75699600 | 0.00000000  |
| C     | 0.04994100  | 0.70512600  | 0.00000000  |
| H     | -0.44173500 | -1.10950800 | -0.81057800 |
| H     | 0.58870300  | 1.06082400  | 0.87680200  |
| H     | -0.94317000 | 1.16558700  | 0.00000000  |
| H     | 0.58870300  | 1.06082400  | -0.87680200 |

**SFA:**

| Atoms | X           | Y           | Z           |
|-------|-------------|-------------|-------------|
| S     | -0.04565300 | 0.04592600  | -0.14447900 |
| O     | -1.08453900 | -0.21880200 | 1.02805600  |
| O     | -0.12674900 | -1.02547100 | -1.08448500 |
| O     | -0.25134700 | 1.40779700  | -0.49883900 |
| N     | 1.39184100  | -0.14902500 | 0.64833400  |
| H     | -1.09734200 | -1.16493200 | 1.21837500  |
| H     | 1.73213500  | 0.74411300  | 0.98246800  |
| H     | 2.05384700  | -0.57901100 | 0.01463600  |

**(MSA)<sub>1</sub>·(MA)<sub>1</sub>:**

| Atoms | X          | Y           | Z           |
|-------|------------|-------------|-------------|
| N     | 2.26374800 | -0.78481100 | -0.01141900 |
| H     | 2.96027900 | -1.43769100 | -0.34749300 |
| H     | 1.99700800 | -1.05454400 | 0.93010200  |
| C     | 2.77584800 | 0.59667400  | -0.00964200 |
| H     | 3.65756200 | 0.71837100  | 0.61835700  |
| H     | 3.01894400 | 0.88490500  | -1.02947200 |
| H     | 1.98571500 | 1.24970800  | 0.35497300  |

| Atoms | X           | Y           | Z           |
|-------|-------------|-------------|-------------|
| S     | -0.86242000 | 0.15986100  | 0.05001700  |
| O     | -1.17602700 | 1.51047400  | -0.31989200 |
| O     | -0.19896900 | -0.06953900 | 1.31801900  |
| O     | -0.02782800 | -0.52825500 | -1.06719700 |
| H     | 0.95971700  | -0.72449400 | -0.68816500 |
| C     | -2.35647500 | -0.78577200 | 0.00743500  |
| H     | -3.02354100 | -0.35409900 | 0.74801700  |
| H     | -2.77867400 | -0.69647000 | -0.98871700 |
| H     | -2.11818100 | -1.81663800 | 0.24786100  |

255

256 (MSA)<sub>1</sub>·(SFA)<sub>1</sub>:

| Atoms | X           | Y           | Z           |
|-------|-------------|-------------|-------------|
| S     | -1.77748800 | 0.04604700  | -0.07120300 |
| O     | -1.22918800 | -0.85281400 | -1.06384500 |
| O     | -1.32031800 | 1.41045800  | -0.10465000 |
| O     | -1.56889500 | -0.56176700 | 1.35823500  |
| H     | -0.59123500 | -0.64199300 | 1.48903100  |
| C     | -3.53295000 | -0.00784900 | -0.14465900 |
| H     | -3.81229100 | 0.39613900  | -1.11339900 |
| H     | -3.84182900 | -1.04355300 | -0.04700300 |
| H     | -3.91905800 | 0.60698000  | 0.66216100  |
| S     | 1.97318100  | -0.07149400 | 0.09330200  |
| O     | 1.51298400  | -0.71650300 | -1.26885100 |
| O     | 1.07624500  | -0.54448900 | 1.12270100  |
| O     | 3.37096500  | -0.29041400 | 0.18255700  |
| N     | 1.71047900  | 1.53251800  | -0.02108100 |
| H     | 0.53725400  | -0.83045300 | -1.27027300 |
| H     | 2.26719600  | 1.93923800  | -0.76145500 |
| H     | 0.71887500  | 1.74449700  | -0.10629100 |

257

258 (MSA)<sub>1</sub>·(SFA)<sub>1</sub>·(MA)<sub>1</sub>:

| Atoms | X           | Y           | Z           |
|-------|-------------|-------------|-------------|
| N     | -0.21536000 | 2.31867300  | -0.59293600 |
| H     | 0.02058800  | 2.92148800  | -1.37513900 |
| H     | 0.63521800  | 1.77768600  | -0.31819000 |
| C     | -0.68847200 | 3.08312900  | 0.58713000  |
| H     | 0.10158900  | 3.74723600  | 0.92315800  |
| H     | -1.57442300 | 3.64980800  | 0.31794400  |
| H     | -0.92541700 | 2.35573500  | 1.35670200  |
| S     | -1.77778500 | -0.56718400 | -0.05684400 |
| O     | -1.14332400 | 0.00216000  | 1.13500800  |
| O     | -0.94772100 | -1.63107500 | -0.66057800 |
| O     | -2.15682700 | 0.47273400  | -1.02387400 |

| Atoms | X           | Y           | Z           |
|-------|-------------|-------------|-------------|
| H     | -0.95555800 | 1.63525400  | -0.88860200 |
| C     | -3.27491900 | -1.36478700 | 0.44118100  |
| H     | -3.01906900 | -2.13700900 | 1.15989000  |
| H     | -3.91774700 | -0.61298700 | 0.88832500  |
| H     | -3.73215900 | -1.79269500 | -0.44552800 |
| S     | 2.15157100  | -0.31648400 | 0.02569900  |
| O     | 1.25256200  | -0.51816100 | -1.24299000 |
| O     | 3.46702300  | -0.76189600 | -0.28056700 |
| O     | 1.95313800  | 1.05735600  | 0.45141300  |
| N     | 1.53243100  | -1.24554200 | 1.21076000  |
| H     | 0.38218900  | -1.01765600 | -1.03629700 |
| H     | 0.57843800  | -0.95260000 | 1.42765100  |
| H     | 1.58780800  | -2.22649700 | 0.96647500  |

259

260

(MSA)<sub>1</sub>·(SFA)<sub>1</sub>·(MA)<sub>2</sub>:

| Atoms | X           | Y           | Z           |
|-------|-------------|-------------|-------------|
| N     | 1.27888700  | -2.30583600 | -0.66569200 |
| H     | 1.19878900  | -2.84808800 | -1.52088500 |
| H     | 0.38221900  | -2.42320700 | -0.14388800 |
| C     | 2.45985600  | -2.68742300 | 0.13748200  |
| H     | 2.39242400  | -3.73455500 | 0.41680600  |
| H     | 3.35719800  | -2.50652500 | -0.44665200 |
| H     | 2.46478500  | -2.05103100 | 1.01606600  |
| S     | 1.67356000  | 1.02413300  | 0.01852200  |
| O     | 1.45804300  | 0.11610300  | 1.15279500  |
| O     | 0.56880300  | 1.97192600  | -0.18837500 |
| O     | 2.07526200  | 0.29617600  | -1.19110300 |
| H     | 1.34965400  | -1.29969500 | -0.93475100 |
| C     | 3.06362200  | 2.04008900  | 0.45521600  |
| H     | 2.80659300  | 2.59203400  | 1.35410800  |
| H     | 3.91400400  | 1.38854900  | 0.63161200  |
| H     | 3.25896600  | 2.71502500  | -0.37253500 |
| S     | -1.69300900 | -1.13177300 | 0.08360500  |
| O     | -0.83990800 | -0.60911600 | -0.98542600 |
| O     | -3.11364900 | -0.98109400 | -0.18632400 |
| O     | -1.25860600 | -2.47045000 | 0.49979600  |
| N     | -1.43811000 | -0.06056900 | 1.35541300  |
| H     | -1.06401100 | 1.52094200  | -0.67766100 |
| H     | -0.43272600 | -0.00846700 | 1.53443800  |
| H     | -1.91718600 | -0.42981600 | 2.16922400  |
| H     | -2.16526000 | 2.12914900  | -1.76900800 |
| N     | -2.05847200 | 1.82271200  | -0.80639800 |
| C     | -2.35099600 | 2.89614100  | 0.16836300  |
| H     | -2.64657000 | 0.98908300  | -0.66086300 |



| Atoms | X           | Y          | Z          |
|-------|-------------|------------|------------|
| H     | -3.36232300 | 3.26467400 | 0.02649400 |
| H     | -1.62389900 | 3.68945800 | 0.02900700 |
| H     | -2.23206600 | 2.45934200 | 1.15392600 |

261

262 (MSA)<sub>1</sub>·(SFA)<sub>2</sub>:

| Atoms | X           | Y           | Z           |
|-------|-------------|-------------|-------------|
| S     | 1.84587300  | -1.37363300 | 0.01983300  |
| O     | 0.82780400  | -1.89814200 | -1.03564800 |
| O     | 1.14243600  | -0.89837700 | 1.18182500  |
| O     | 2.76540000  | -0.47344900 | -0.63927300 |
| H     | 2.40713200  | 1.16989400  | -0.35497800 |
| C     | 2.74137900  | -2.83499100 | 0.42853100  |
| H     | 2.04522000  | -3.53876600 | 0.87405100  |
| H     | 3.17390500  | -3.22702300 | -0.48694200 |
| H     | 3.51507000  | -2.54579500 | 1.13376800  |
| S     | 0.58551600  | 2.19630600  | -0.07855500 |
| O     | 0.18854100  | 3.52007200  | -0.40434800 |
| O     | 0.12606600  | 1.10580700  | -0.94150600 |
| O     | 2.13469200  | 2.07628400  | -0.06369300 |
| N     | 0.20880500  | 1.92428700  | 1.48472600  |
| H     | -1.33843000 | 0.70234600  | -1.15752700 |
| H     | 0.35035600  | 0.93806200  | 1.69885900  |
| H     | -0.76606600 | 2.16444000  | 1.63096500  |
| S     | -2.40116100 | -0.62812300 | 0.08025100  |
| O     | -1.62759200 | -1.83246500 | -0.13077300 |
| O     | -2.19564100 | 0.13966200  | 1.26700900  |
| O     | -2.26344000 | 0.28523600  | -1.17460800 |
| N     | -3.96036400 | -1.09565500 | 0.03257400  |
| H     | -0.10440200 | -1.84085300 | -0.68126200 |
| H     | -4.16069100 | -1.62025300 | -0.80979000 |
| H     | -4.57921800 | -0.30235900 | 0.14422500  |

263

264 (MSA)<sub>1</sub>·(SFA)<sub>2</sub>·(MA)<sub>1</sub>:

| Atoms | X           | Y           | Z           |
|-------|-------------|-------------|-------------|
| N     | 0.23257300  | -0.52840400 | 2.39574300  |
| H     | 1.21152400  | -0.66898100 | 2.63475800  |
| H     | 0.01112800  | -1.19521700 | 1.64303300  |
| C     | -0.68315600 | -0.66547000 | 3.55091100  |
| H     | -0.56883600 | -1.65389700 | 3.98483200  |
| H     | -0.44166900 | 0.09553900  | 4.28629000  |
| H     | -1.69386900 | -0.53083100 | 3.18288700  |
| S     | 0.76799600  | 2.15687300  | -0.09040900 |
| O     | -0.08450300 | 1.54985600  | -1.12777000 |

| Atoms | X           | Y           | Z           |
|-------|-------------|-------------|-------------|
| O     | 2.16321200  | 1.68497100  | -0.22405000 |
| O     | 0.23694800  | 1.99373900  | 1.26054900  |
| H     | 0.15178000  | 0.41426600  | 1.95761100  |
| C     | 0.82343100  | 3.89052700  | -0.41754800 |
| H     | 1.21592900  | 4.02777900  | -1.42013000 |
| H     | -0.18951000 | 4.27318700  | -0.33643400 |
| H     | 1.47308000  | 4.34549500  | 0.32359800  |
| S     | 1.86078300  | -1.72046800 | -0.44214200 |
| O     | 2.40579100  | -0.66505900 | 0.58670100  |
| O     | 2.88747200  | -2.67118800 | -0.69637700 |
| O     | 0.58972600  | -2.17404000 | 0.08847700  |
| N     | 1.52714600  | -0.92708700 | -1.82133800 |
| H     | 2.34303500  | 0.30560000  | 0.23554700  |
| H     | 0.82041200  | -0.19896500 | -1.70505000 |
| H     | 2.37196700  | -0.57737600 | -2.25581600 |
| S     | -2.64042200 | -0.48130300 | -0.40953800 |
| O     | -2.64252900 | 0.99415900  | -0.91427400 |
| O     | -1.91019200 | -0.55293300 | 0.83190200  |
| O     | -3.99234000 | -0.92709800 | -0.47422200 |
| N     | -1.69822000 | -1.23932300 | -1.52212700 |
| H     | -1.69787600 | 1.30089700  | -0.97474200 |
| H     | -2.26392500 | -1.68280700 | -2.23291600 |
| H     | -1.05770000 | -1.88221900 | -1.06367600 |

265

266

**(MSA)<sub>1</sub>·(SFA)<sub>2</sub>·(MA)<sub>2</sub>:**

| Atoms | X           | Y           | Z           |
|-------|-------------|-------------|-------------|
| N     | -0.09812500 | 2.46508100  | -0.25975000 |
| H     | 0.75026800  | 1.97240800  | -0.59721300 |
| H     | -0.08194000 | 2.40727000  | 0.76137900  |
| C     | -0.17601900 | 3.84842700  | -0.76224500 |
| H     | 0.69786300  | 4.40692900  | -0.44101100 |
| H     | -0.21194400 | 3.81786500  | -1.84669600 |
| H     | -1.07974800 | 4.31653600  | -0.38451800 |
| S     | -2.94281200 | 0.07123800  | -0.58150400 |
| O     | -2.97593100 | 0.19676500  | 0.87569200  |
| O     | -2.43886300 | -1.23509600 | -1.04062900 |
| O     | -2.29442200 | 1.20978400  | -1.24819800 |
| H     | -0.92456100 | 1.90058100  | -0.57714300 |
| C     | -4.63240300 | 0.11893400  | -1.12083500 |
| H     | -5.15574800 | -0.70815400 | -0.65108700 |
| H     | -5.05373600 | 1.06953400  | -0.80859200 |
| H     | -4.64481200 | 0.02406600  | -2.20216200 |
| S     | 0.14179900  | -0.09466600 | 1.86164800  |
| O     | 0.03944200  | -0.02252900 | 0.42313000  |

| Atoms | X           | Y           | Z           |
|-------|-------------|-------------|-------------|
| O     | 1.43440900  | -0.83702300 | 2.24680100  |
| O     | 0.03402800  | 1.16205100  | 2.55761800  |
| N     | -0.98083400 | -1.20394000 | 2.32499600  |
| H     | -0.93490100 | -1.84879500 | -0.76670500 |
| H     | -1.87033600 | -0.85974800 | 1.93137300  |
| H     | -1.03090500 | -1.24341100 | 3.33754300  |
| H     | 0.75755800  | -1.85328000 | -0.75254800 |
| N     | -0.08245200 | -2.43092900 | -0.56324400 |
| C     | -0.07889700 | -3.68128200 | -1.34437300 |
| H     | -0.10453600 | -2.59521800 | 0.44373000  |
| H     | 0.80447900  | -4.26306300 | -1.09930500 |
| H     | -0.06474700 | -3.42503900 | -2.39894300 |
| H     | -0.97843400 | -4.24690200 | -1.12114200 |
| S     | 2.90904900  | 0.08404400  | -0.70742400 |
| O     | 3.09377500  | 0.20145900  | 0.75536600  |
| O     | 2.33912400  | -1.18414500 | -1.13796700 |
| O     | 2.25554800  | 1.26313900  | -1.26809600 |
| N     | 4.48011100  | 0.02599900  | -1.25863600 |
| H     | 2.20359800  | -0.43995800 | 1.63006200  |
| H     | 4.45138400  | -0.03899700 | -2.27036400 |
| H     | 4.93875000  | 0.89232600  | -0.99875300 |

267

268 (MSA)<sub>1</sub>·(SFA)<sub>2</sub>·(MA)<sub>3</sub>:

| Atoms | X           | Y           | Z           |
|-------|-------------|-------------|-------------|
| N     | -0.77975000 | -0.58328900 | -1.95741600 |
| H     | -0.22778000 | -0.99069200 | -1.18931900 |
| H     | -0.80656700 | 0.44014900  | -1.80813700 |
| C     | -0.12581100 | -0.91739500 | -3.23735500 |
| H     | 0.89725200  | -0.55624500 | -3.19710800 |
| H     | -0.12671100 | -1.99565600 | -3.36473700 |
| H     | -0.66334000 | -0.44265500 | -4.05232300 |
| S     | -3.33828400 | -0.59555300 | 0.20086000  |
| O     | -2.38789700 | 0.52780300  | 0.12727600  |
| O     | -3.15719300 | -1.37216500 | 1.43438700  |
| O     | -3.32099200 | -1.40296700 | -1.01962200 |
| H     | -1.74243200 | -0.94447900 | -1.86074100 |
| C     | -4.96047200 | 0.11612100  | 0.30399000  |
| H     | -5.00187200 | 0.73274500  | 1.19665200  |
| H     | -5.12235200 | 0.71101400  | -0.58971500 |
| H     | -5.67714700 | -0.69742500 | 0.36301700  |
| S     | 0.23443800  | 2.32340000  | -0.40277100 |
| O     | 0.63758700  | 1.01609600  | 0.14519000  |
| O     | 1.34504600  | 3.28055600  | -0.38530400 |
| O     | -0.39655500 | 2.19120700  | -1.71119500 |

| Atoms | X           | Y           | Z           |
|-------|-------------|-------------|-------------|
| N     | -0.85646400 | 2.91624000  | 0.70383100  |
| H     | -1.48609400 | -1.06306000 | 1.88226900  |
| H     | -1.69454300 | 2.33782400  | 0.62379700  |
| H     | -1.07641000 | 3.87054900  | 0.43977900  |
| H     | 0.04627300  | -1.61072200 | 1.46686000  |
| N     | -0.47329400 | -0.82787500 | 1.87648300  |
| C     | 0.05872300  | -0.43881700 | 3.19631900  |
| H     | -0.34102400 | -0.05238700 | 1.20316700  |
| H     | 1.12973900  | -0.29450000 | 3.09752100  |
| H     | -0.14511700 | -1.22419300 | 3.91779700  |
| H     | -0.42343100 | 0.48320600  | 3.50705400  |
| S     | 2.19832200  | -1.77842300 | -0.10278300 |
| O     | 2.61940500  | -0.89787100 | -1.19287000 |
| O     | 2.44642600  | -1.25790700 | 1.23288000  |
| O     | 0.80749000  | -2.23920300 | -0.26601000 |
| N     | 3.21296800  | -3.09899900 | -0.24099500 |
| H     | 2.72218100  | 2.28235300  | -0.33429700 |
| H     | 2.95376600  | -3.77317500 | 0.47082500  |
| H     | 3.06751500  | -3.51710100 | -1.15352100 |
| H     | 4.29968400  | 1.67422700  | -0.44166600 |
| N     | 3.38372800  | 1.53147900  | -0.02800500 |
| C     | 3.43584100  | 1.54664000  | 1.45451400  |
| H     | 3.00642900  | 0.62788200  | -0.38432200 |
| H     | 3.87264800  | 2.48591600  | 1.78076700  |
| H     | 4.01002000  | 0.69555700  | 1.80247100  |
| H     | 2.41116600  | 1.46350300  | 1.79906200  |

269

270 (SFA)<sub>1</sub>·(MA)<sub>1</sub>:

| Atoms | X           | Y           | Z           |
|-------|-------------|-------------|-------------|
| H     | 0.90531600  | -0.78686000 | -0.69834300 |
| N     | 2.22367900  | -0.72567300 | -0.04736400 |
| C     | 2.62380200  | 0.69000000  | 0.01175900  |
| H     | 2.96005900  | -1.30434900 | -0.43091400 |
| H     | 1.80632200  | 1.25001300  | 0.45875800  |
| H     | 2.77623100  | 1.05743800  | -1.00033800 |
| H     | 3.53313900  | 0.84761800  | 0.59107500  |
| S     | -0.95621000 | -0.09556200 | 0.08123100  |
| O     | -0.27297500 | -0.19486100 | 1.34537000  |
| O     | -0.11638600 | -0.75074400 | -1.02985600 |
| O     | -2.30679000 | -0.54518400 | -0.03856600 |
| N     | -0.83071900 | 1.52080100  | -0.33668300 |
| H     | 2.00684800  | -1.06191100 | 0.88535600  |
| H     | -1.19511800 | 2.05747000  | 0.44388800  |
| H     | -1.41775700 | 1.69000200  | -1.14698700 |

271

272 (MSA)<sub>2</sub>:

| Atoms | X           | Y           | Z           |
|-------|-------------|-------------|-------------|
| S     | -2.01703200 | -0.12116800 | -0.07554800 |
| O     | -3.38279900 | -0.51870000 | -0.15695700 |
| O     | -1.08526100 | -0.58726700 | -1.08778600 |
| O     | -1.47968700 | -0.56725800 | 1.33259400  |
| H     | -0.49471800 | -0.63142600 | 1.32106200  |
| C     | -1.90839400 | 1.63907100  | -0.00788700 |
| H     | -2.29408700 | 2.01082200  | -0.95333000 |
| H     | -2.52434700 | 1.97225200  | 0.82154800  |
| H     | -0.86386000 | 1.91150700  | 0.12239100  |
| S     | 1.83810800  | 0.07678800  | 0.05760300  |
| O     | 1.22156500  | -0.65720800 | 1.14747700  |
| O     | 1.49707400  | 1.46543100  | -0.07088500 |
| O     | 1.56577000  | -0.68493700 | -1.28834900 |
| H     | 0.58261500  | -0.74670300 | -1.38965200 |
| C     | 3.58316300  | -0.12754000 | 0.14798100  |
| H     | 3.90252300  | 0.38176000  | 1.05269800  |
| H     | 3.79580100  | -1.19039300 | 0.19726700  |
| H     | 4.01694800  | 0.33258200  | -0.73418000 |

273

274 (MSA)<sub>2</sub>·(MA)<sub>1</sub>:

| Atoms | X           | Y           | Z           |
|-------|-------------|-------------|-------------|
| N     | 0.77377400  | 2.33273000  | -0.72007100 |
| H     | -0.12344400 | 1.81205000  | -0.63298100 |
| H     | 0.70873400  | 2.94627200  | -1.52667500 |
| C     | 1.06893900  | 3.07984700  | 0.52553600  |
| H     | 1.13538400  | 2.35191400  | 1.32733100  |
| H     | 2.01515300  | 3.60039600  | 0.41425300  |
| H     | 0.27040300  | 3.78865900  | 0.72150900  |
| S     | 1.78237900  | -0.73183800 | -0.07931400 |
| O     | 0.97900500  | -1.71451000 | -0.77475000 |
| O     | 1.01601400  | -0.01631700 | 0.98562700  |
| O     | 2.44644400  | 0.26163400  | -0.94456300 |
| H     | 1.51030900  | 1.59290300  | -0.89430700 |
| C     | 3.08399800  | -1.58801200 | 0.75961300  |
| H     | 2.62704200  | -2.30585300 | 1.43378300  |
| H     | 3.68115500  | -2.08983700 | 0.00417700  |
| H     | 3.67476800  | -0.85808300 | 1.30364400  |
| S     | -2.27077600 | -0.11980600 | 0.07022900  |
| O     | -1.57166900 | 0.93570200  | -0.65631500 |
| O     | -3.60267000 | 0.14925300  | 0.51545600  |
| O     | -1.41644100 | -0.53601400 | 1.29484500  |
| H     | -0.40953900 | -0.36815500 | 1.14170600  |

| Atoms | X           | Y           | Z           |
|-------|-------------|-------------|-------------|
| C     | -2.26653000 | -1.55293800 | -0.95696300 |
| H     | -1.23194700 | -1.78749300 | -1.19475900 |
| H     | -2.74328900 | -2.35259800 | -0.39828600 |
| H     | -2.84069900 | -1.30434100 | -1.84505300 |

275

276 (MSA)<sub>2</sub>·(SFA)<sub>1</sub>:

| Atoms | X           | Y           | Z           |
|-------|-------------|-------------|-------------|
| S     | 2.52743000  | -0.71148500 | -0.14183400 |
| O     | 2.90820300  | 0.51136000  | -0.78330500 |
| O     | 1.58584300  | -1.59151500 | -0.79223900 |
| O     | 2.00351900  | -0.40970500 | 1.31578000  |
| H     | 1.45015800  | 0.41335400  | 1.30413800  |
| C     | 3.96223800  | -1.64977700 | 0.27302000  |
| H     | 4.40002500  | -1.97384500 | -0.66693100 |
| H     | 4.64130000  | -1.00442000 | 0.82042800  |
| H     | 3.65124500  | -2.50269700 | 0.86790500  |
| S     | -0.42701700 | 1.98282900  | 0.13143100  |
| O     | -0.07121400 | 1.02086100  | -1.02683400 |
| O     | 0.49235900  | 1.78270300  | 1.22916800  |
| O     | -1.84240000 | 1.90386800  | 0.42456100  |
| H     | -2.81091600 | 0.47366600  | 0.73318600  |
| C     | -0.06840500 | 3.54794800  | -0.58635900 |
| H     | 0.96705300  | 3.51572000  | -0.91411500 |
| H     | -0.74762400 | 3.69812200  | -1.41922100 |
| H     | -0.21389100 | 4.29656500  | 0.18684600  |
| S     | -2.27646000 | -1.36500200 | -0.10543000 |
| O     | -1.91443900 | -0.69864200 | -1.34619700 |
| O     | -3.20210000 | -0.43026000 | 0.73613800  |
| O     | -2.92055400 | -2.62841400 | -0.16503600 |
| N     | -0.89922500 | -1.33250300 | 0.77900000  |
| H     | -0.81598800 | 0.34628600  | -1.20558800 |
| H     | -0.09723000 | -1.62350500 | 0.21396600  |
| H     | -0.98954000 | -1.88427000 | 1.62345200  |

277

278 (MSA)<sub>2</sub>·(SFA)<sub>1</sub>·(MA)<sub>1</sub>:

| Atoms | X           | Y           | Z           |
|-------|-------------|-------------|-------------|
| N     | -0.01836400 | -1.95799700 | -0.00643000 |
| H     | -0.82136400 | -2.22276500 | -0.57918200 |
| H     | -0.11511600 | -0.94337600 | 0.14944200  |
| C     | 0.03307900  | -2.69035900 | 1.27720000  |
| H     | -0.86421200 | -2.45747000 | 1.84147700  |
| H     | 0.09492300  | -3.75638400 | 1.08121000  |
| H     | 0.91601500  | -2.35127600 | 1.80909200  |

| Atoms | X           | Y           | Z           |
|-------|-------------|-------------|-------------|
| S     | 2.97123300  | -0.56608400 | -0.28750300 |
| O     | 2.25698800  | -0.46957300 | 0.99329500  |
| O     | 2.99724300  | 0.71745400  | -1.01351900 |
| O     | 2.49667100  | -1.68850200 | -1.09859500 |
| H     | 0.87130000  | -2.04901900 | -0.53861800 |
| C     | 4.66585900  | -0.91077800 | 0.09276000  |
| H     | 5.04325800  | -0.09693000 | 0.70394400  |
| H     | 4.70286500  | -1.85323700 | 0.63015300  |
| H     | 5.20891400  | -0.97681000 | -0.84508400 |
| S     | 0.07030500  | 1.93796800  | 0.17680600  |
| O     | 1.40644000  | 2.52636300  | -0.32630200 |
| O     | -0.91243800 | 2.97549800  | 0.17751000  |
| O     | -0.19621500 | 0.72820600  | -0.57722300 |
| N     | 0.29262100  | 1.47013200  | 1.73228300  |
| H     | 2.05193800  | 1.76743200  | -0.62180400 |
| H     | 1.10741000  | 0.85573300  | 1.77787900  |
| H     | 0.40617500  | 2.29165600  | 2.31348500  |
| S     | -3.10874900 | -0.56855500 | -0.21106800 |
| O     | -2.67194700 | -1.50952400 | -1.20438000 |
| O     | -2.42560900 | -0.52378200 | 1.05427500  |
| O     | -4.64133900 | -0.90950600 | 0.11020400  |
| H     | -4.73989900 | -0.92357100 | 1.07033900  |
| C     | -3.25821200 | 1.02610400  | -0.94045500 |
| H     | -2.28890600 | 1.26274000  | -1.36740600 |
| H     | -4.03181800 | 0.95696000  | -1.69938100 |
| H     | -3.50859100 | 1.73522300  | -0.15742500 |

279

280

(MSA)<sub>2</sub>·(SFA)<sub>1</sub>·(MA)<sub>2</sub>:

| Atoms | X           | Y           | Z           |
|-------|-------------|-------------|-------------|
| N     | 0.16668400  | -1.40622000 | -1.81642600 |
| H     | 0.86192800  | -0.69087000 | -2.05986400 |
| H     | -0.78549300 | -1.02199400 | -1.88877200 |
| C     | 0.35827100  | -2.66087900 | -2.56378000 |
| H     | 1.37414600  | -3.00545500 | -2.39632800 |
| H     | -0.35034400 | -3.39620200 | -2.19518800 |
| H     | 0.19375200  | -2.48504000 | -3.62212600 |
| N     | 0.14550400  | 0.06960000  | 2.07231900  |
| H     | -0.31587700 | -0.54726600 | 1.37989300  |
| H     | -0.48282800 | 0.85332800  | 2.23774500  |
| C     | 0.44922800  | -0.71262300 | 3.28645700  |
| H     | 1.11551600  | -1.51632700 | 2.98892900  |
| H     | 0.92981300  | -0.07580000 | 4.02279600  |
| H     | -0.47375300 | -1.12221000 | 3.68542400  |
| S     | 2.74583800  | -0.45661500 | 0.03157100  |

| Atoms | X           | Y           | Z           |
|-------|-------------|-------------|-------------|
| O     | 2.70448800  | -0.22950000 | -1.40734800 |
| O     | 1.82610400  | -1.51935100 | 0.47658500  |
| O     | 2.57029000  | 0.76370100  | 0.84975900  |
| H     | 1.01581300  | 0.42577900  | 1.63236700  |
| C     | 4.38486300  | -1.02761700 | 0.40480400  |
| H     | 4.55312500  | -1.94687400 | -0.14769800 |
| H     | 5.08297200  | -0.25638100 | 0.09368400  |
| H     | 4.44775000  | -1.20017900 | 1.47477200  |
| S     | -2.55764800 | -0.92111400 | 0.15404000  |
| O     | -2.64544500 | 0.34721600  | 0.92258200  |
| O     | -1.41174900 | -1.72750200 | 0.60766300  |
| O     | -2.59912800 | -0.74169800 | -1.29006800 |
| H     | 0.33447000  | -1.56054300 | -0.81153700 |
| C     | -4.01354200 | -1.82084300 | 0.60958000  |
| H     | -4.87399000 | -1.23157800 | 0.30753900  |
| H     | -3.99139700 | -2.77200200 | 0.08661200  |
| H     | -3.99880000 | -1.96705300 | 1.68498000  |
| S     | -0.39653100 | 2.31080400  | -0.59342100 |
| O     | -1.85940200 | 2.50548300  | -0.13307900 |
| O     | -0.10578800 | 0.89943600  | -0.66751000 |
| O     | -0.17161600 | 3.15349600  | -1.72134300 |
| N     | 0.46783300  | 2.82352500  | 0.72990500  |
| H     | -2.21323500 | 1.63108600  | 0.26944500  |
| H     | 0.50622100  | 3.83670100  | 0.73300400  |
| H     | 1.40856800  | 2.43286300  | 0.62842300  |

281

282 (MSA)<sub>2</sub>·(SFA)<sub>1</sub>·(MA)<sub>3</sub>:

| Atoms | X           | Y           | Z           |
|-------|-------------|-------------|-------------|
| N     | 0.12925400  | -0.14997600 | -2.00791100 |
| H     | 0.32017300  | 0.85426700  | -1.85972900 |
| H     | -0.88374800 | -0.29910000 | -1.93395900 |
| C     | 0.71810800  | -0.66402300 | -3.25714400 |
| H     | 1.78521900  | -0.46746400 | -3.21954900 |
| H     | 0.53850500  | -1.73351700 | -3.31030400 |
| H     | 0.27081300  | -0.16243500 | -4.11010200 |
| N     | 0.39547900  | -1.22532500 | 1.92241200  |
| H     | 0.77753200  | -1.63266600 | 1.05003800  |
| H     | -0.62760700 | -1.31653200 | 1.87995200  |
| C     | 1.01508200  | -1.82868200 | 3.11670100  |
| H     | 2.08324400  | -1.64811800 | 3.05886200  |
| H     | 0.60371100  | -1.36800700 | 4.00977000  |
| H     | 0.80706900  | -2.89429600 | 3.12468800  |
| S     | 2.93349500  | -0.54632900 | -0.10204700 |
| O     | 2.74640900  | 0.61091600  | -0.97869400 |



| Atoms | X           | Y           | Z           |
|-------|-------------|-------------|-------------|
| O     | 1.94722300  | -1.61572000 | -0.39364500 |
| O     | 2.97581600  | -0.21469100 | 1.31858000  |
| H     | 0.60681200  | -0.22513000 | 1.83081200  |
| C     | 4.51517300  | -1.24260800 | -0.51574900 |
| H     | 4.49502400  | -1.52895100 | -1.56306300 |
| H     | 5.26876400  | -0.48158800 | -0.33689000 |
| H     | 4.67937000  | -2.10801900 | 0.11896800  |
| S     | -2.31210500 | -1.67165000 | -0.13856400 |
| O     | -2.45423000 | -1.13647000 | 1.23803200  |
| O     | -1.01955500 | -2.30323000 | -0.36207000 |
| O     | -2.65302100 | -0.65405100 | -1.14148800 |
| H     | 0.55701700  | -0.65439100 | -1.21702900 |
| C     | -3.54289100 | -2.94304500 | -0.28129000 |
| H     | -4.51851100 | -2.49164500 | -0.12872000 |
| H     | -3.46425400 | -3.36817000 | -1.27733700 |
| H     | -3.33962100 | -3.69451700 | 0.47553700  |
| S     | 0.05968500  | 2.38321900  | 0.20389000  |
| O     | -0.86065400 | 3.30360400  | 0.88197600  |
| O     | -0.24651900 | 0.97607100  | 0.51831900  |
| O     | 0.11125400  | 2.59243600  | -1.24389200 |
| N     | 1.53311300  | 2.66502200  | 0.89716500  |
| H     | -2.21031900 | 2.26085600  | 1.19122300  |
| H     | 1.76797500  | 3.64060000  | 0.75171800  |
| H     | 2.21641800  | 2.07053100  | 0.42426500  |
| H     | -3.78445300 | 1.71378900  | 1.49472200  |
| N     | -2.99215200 | 1.65107600  | 0.86359400  |
| H     | -2.65421900 | 0.67020500  | 0.86970200  |
| C     | -3.34075000 | 2.10196800  | -0.50856500 |
| H     | -4.08520000 | 1.43524200  | -0.92685700 |
| H     | -3.69541200 | 3.12662700  | -0.45361900 |
| H     | -2.43346600 | 2.06042400  | -1.10304100 |

283

284 (MSA)<sub>2</sub>·(MA)<sub>2</sub>:

| Atoms | X           | Y           | Z           |
|-------|-------------|-------------|-------------|
| N     | 0.11192700  | -2.09657100 | 0.01406700  |
| H     | 0.88599900  | -1.72297100 | -0.57703400 |
| H     | -0.69082900 | -2.37208200 | -0.55919700 |
| C     | 0.63550000  | -3.16287400 | 0.88977300  |
| H     | 1.44362000  | -2.73873300 | 1.47811600  |
| H     | -0.15595000 | -3.51655400 | 1.54308900  |
| H     | 1.01051100  | -3.97914600 | 0.28048900  |
| N     | -0.11192300 | 2.09657300  | 0.01402900  |
| H     | 0.24452800  | 1.30262100  | 0.57021500  |
| H     | -0.88599500 | 1.72295200  | -0.57705800 |

| Atoms | X           | Y           | Z           |
|-------|-------------|-------------|-------------|
| C     | -0.63551500 | 3.16286000  | 0.88974300  |
| H     | 0.15593300  | 3.51656500  | 1.54304800  |
| H     | -1.01056100 | 3.97912000  | 0.28046500  |
| H     | -1.44361300 | 2.73869200  | 1.47809700  |
| S     | 2.55170800  | 0.17194000  | -0.22445200 |
| O     | 2.38340100  | -1.01980300 | -1.07173500 |
| O     | 1.65768900  | 0.10853800  | 0.95327600  |
| O     | 2.43510000  | 1.43813200  | -0.94524300 |
| H     | 0.69081300  | 2.37210700  | -0.55925000 |
| C     | 4.21080900  | 0.09765900  | 0.39822800  |
| H     | 4.32519500  | -0.83359800 | 0.94431900  |
| H     | 4.88201500  | 0.13222100  | -0.45454200 |
| H     | 4.36384300  | 0.95349200  | 1.04822000  |
| S     | -2.55170700 | -0.17193900 | -0.22441200 |
| O     | -2.38340600 | 1.01978100  | -1.07172700 |
| O     | -1.65767400 | -0.10851100 | 0.95330200  |
| O     | -2.43511300 | -1.43815000 | -0.94517500 |
| H     | -0.24448900 | -1.30260900 | 0.57025800  |
| C     | -4.21080000 | -0.09763700 | 0.39828400  |
| H     | -4.88201600 | -0.13222300 | -0.45447700 |
| H     | -4.36382800 | -0.95345100 | 1.04830400  |
| H     | -4.32517800 | 0.83363600  | 0.94434900  |

285

286 (SFA)<sub>2</sub>:

| Atoms | X            | Y           | Z           |
|-------|--------------|-------------|-------------|
| S     | 1.94099500   | -0.03812100 | 0.08938100  |
| O     | 1.63046500   | -1.04323800 | -1.07511700 |
| O     | 1.04729800   | -0.35013200 | 1.18230000  |
| O     | 3.34887100   | -0.05958700 | 0.27474000  |
| N     | 1.49427800   | 1.41063700  | -0.52020200 |
| H     | 0.66552400   | -1.03200800 | -1.23859600 |
| H     | 2.26943500   | 2.05706800  | -0.51766900 |
| H     | 0.64845500   | 1.76287600  | -0.08507300 |
| S     | -1.77388000  | 0.05080700  | -0.03323800 |
| O     | -1.58921400  | -0.81218800 | 1.25792500  |
| O     | -1.44539400  | 1.41799300  | 0.24642600  |
| O     | -1.11402100  | -0.61602500 | -1.12949300 |
| N     | -3.38451100  | -0.08175900 | -0.23469000 |
| H     | -0.62312900  | -0.80874100 | 1.45154100  |
| H     | -3.82181100  | 0.82871500  | -0.20954800 |
| H     | -3.604734000 | -0.60761700 | -1.06893400 |

287 (SFA)<sub>2</sub>·(MA)<sub>1</sub>:

| Atoms | X            | Y           | Z           |
|-------|--------------|-------------|-------------|
| H     | -1.55598100  | 1.64215800  | -0.82412500 |
| N     | -0.75339900  | 2.31448400  | -0.70620500 |
| C     | -0.86366600  | 3.06419700  | 0.56761200  |
| H     | -0.70215000  | 2.93064900  | -1.51176300 |
| H     | -0.96187800  | 2.33044600  | 1.36011700  |
| H     | -1.74007700  | 3.70407000  | 0.53557700  |
| H     | 0.03260800   | 3.65947600  | 0.71215000  |
| S     | 2.18332300   | -0.21522100 | -0.06969500 |
| O     | 1.46037100   | 0.74981100  | -0.87374900 |
| O     | 1.59510000   | -1.62287500 | -0.36720700 |
| O     | 3.59809200   | -0.30427200 | -0.18149900 |
| N     | 1.82945000   | 0.13521800  | 1.49394200  |
| H     | 0.10097800   | 1.71690000  | -0.70099900 |
| H     | 2.39872200   | -0.44695700 | 2.09651700  |
| H     | 0.83355000   | -0.01815700 | 1.65367100  |
| S     | -1.73988300  | -0.68039800 | -0.03031400 |
| O     | -0.93075900  | -1.56916800 | -0.86169100 |
| O     | -0.98739200  | 0.00111800  | 1.01975400  |
| O     | -2.52334600  | 0.28531900  | -0.81585100 |
| N     | -2.77835100  | -1.71004000 | 0.75583900  |
| H     | 0.60346700   | -1.58335200 | -0.56820200 |
| H     | -3.20110500  | -2.32122400 | 0.06612600  |
| H     | -3.50160500v | -1.16640100 | 1.21230600  |

288

289

**(SFA)<sub>2</sub>·(MA)<sub>2</sub>:**

| Atoms | X           | Y           | Z           |
|-------|-------------|-------------|-------------|
| H     | 0.76020400  | 1.28556600  | 0.89213400  |
| S     | -2.35222000 | 0.21155500  | -0.28299200 |
| O     | -1.80732900 | 1.29217100  | -1.09680500 |
| O     | -2.36089700 | -1.09653400 | -0.91469700 |
| O     | -1.72908500 | 0.14382700  | 1.05856500  |
| N     | 0.14628500  | 2.10390900  | 0.68572400  |
| H     | -0.34751800 | 1.88761700  | -0.19979300 |
| C     | 0.91480000  | 3.36288200  | 0.61782300  |
| H     | 1.38284800  | 3.54800200  | 1.58014700  |
| H     | 0.24642600  | 4.18073500  | 0.36656000  |
| H     | 1.67517800  | 3.23817600  | -0.14530500 |
| H     | -0.76023900 | -1.28573200 | 0.89189800  |
| S     | 2.35222300  | -0.21150500 | -0.28298500 |
| O     | 1.72906200  | -0.14399900 | 1.05857100  |
| O     | 1.80735900  | -1.29199800 | -1.09697900 |
| O     | 2.36089700  | 1.09668400  | -0.91448000 |
| N     | -0.14630300 | -2.10402700 | 0.68535500  |
| H     | 0.34751600  | -1.88757300 | -0.20011400 |

| Atoms | X           | Y           | Z           |
|-------|-------------|-------------|-------------|
| C     | -0.91479500 | -3.36300100 | 0.61721500  |
| H     | -1.38286700 | -3.54829500 | 1.57949400  |
| H     | -0.24640000 | -4.18080000 | 0.36583000  |
| H     | -1.67515500 | -3.23817900 | -0.14591200 |
| N     | -3.92072900 | 0.70686800  | 0.02811700  |
| H     | -4.34639200 | 0.93071600  | -0.86510000 |
| H     | -4.42428200 | -0.07201300 | 0.43792400  |
| N     | 3.92073200  | -0.70685000 | 0.02807300  |
| H     | 4.34640900  | -0.93056100 | -0.86517100 |
| H     | 4.42427300  | 0.07197600  | 0.43800300  |
| H     | -0.59422900 | 2.09959700  | 1.38544100  |
| H     | 0.59419800  | -2.09982700 | 1.38508600  |

290

291 (MSA)<sub>3</sub>:

| Atoms | X           | Y           | Z           |
|-------|-------------|-------------|-------------|
| S     | -0.99750600 | 1.99166100  | 0.10351800  |
| O     | -0.04095400 | 1.87612400  | 1.16639600  |
| O     | -2.30343300 | 1.37811400  | 0.27254600  |
| O     | -0.39749100 | 1.45690400  | -1.23071000 |
| S     | 2.78804600  | -0.28282000 | -0.12524000 |
| O     | 2.21335000  | -1.73915200 | -0.24575500 |
| H     | 1.23319900  | -1.70421500 | -0.13827500 |
| O     | 1.99242800  | 0.60087800  | -0.96504600 |
| O     | 4.18743500  | -0.35911600 | -0.38173400 |
| H     | 0.52793000  | 1.07692500  | -1.08118500 |
| C     | -1.27984700 | 3.68991700  | -0.27640800 |
| H     | -1.76574500 | 4.13077500  | 0.58920300  |
| H     | -0.31541900 | 4.15133800  | -0.46434600 |
| H     | -1.92194700 | 3.73555700  | -1.15043700 |
| C     | 2.48310300  | 0.13032500  | 1.56122300  |
| H     | 3.06616000  | -0.55422300 | 2.16932700  |
| H     | 2.80623600  | 1.15849700  | 1.69716500  |
| H     | 1.41537000  | 0.04494300  | 1.74310600  |
| S     | -1.61543300 | -1.86135800 | 0.08338200  |
| O     | -1.66525400 | -3.25982300 | 0.35366400  |
| O     | -0.34477700 | -1.15975000 | 0.20769400  |
| O     | -2.63988700 | -1.15345000 | 1.03310400  |
| H     | -2.54164900 | -0.17445500 | 0.92431600  |
| C     | -2.24555400 | -1.51715200 | -1.52926300 |
| H     | -3.23400200 | -1.96009400 | -1.60074400 |
| H     | -2.26993200 | -0.43718300 | -1.65052400 |
| H     | -1.55945100 | -1.97198800 | -2.23874600 |

292 (MSA)<sub>3</sub>·(MA)<sub>1</sub>:

| Atoms | X           | Y           | Z           |
|-------|-------------|-------------|-------------|
| N     | 0.33303400  | -0.03735500 | 2.17339700  |
| H     | -0.17968800 | -0.56037900 | 1.44510100  |
| H     | 0.77822400  | 0.77905100  | 1.71222800  |
| C     | -0.61861200 | 0.39570100  | 3.22100400  |
| H     | -1.34169600 | 1.05274100  | 2.74793900  |
| H     | -1.12506600 | -0.47648400 | 3.62071500  |
| H     | -0.07948200 | 0.92217200  | 4.00232700  |
| S     | 0.10369400  | 2.14871500  | -0.34584400 |
| O     | 0.41741600  | 1.23576600  | -1.47065300 |
| O     | 1.16165500  | 2.15939600  | 0.66265600  |
| O     | -1.21374600 | 1.86024900  | 0.24056700  |
| H     | 1.08876900  | -0.63288300 | 2.50781900  |
| C     | 0.01365700  | 3.77136600  | -1.04087100 |
| H     | 0.98656400  | 4.00291400  | -1.46335500 |
| H     | -0.75514200 | 3.76197200  | -1.80754000 |
| H     | -0.23994700 | 4.45836100  | -0.23956100 |
| S     | -2.64975500 | -1.20520500 | -0.25443700 |
| O     | -3.81370900 | -2.03234000 | -0.30032000 |
| O     | -1.85157100 | -1.19092400 | 0.95707200  |
| O     | -3.10368600 | 0.26332200  | -0.56351800 |
| H     | -2.38182300 | 0.90011000  | -0.29319700 |
| C     | -1.59171500 | -1.57980000 | -1.61551600 |
| H     | -1.16680600 | -2.56171800 | -1.42967300 |
| H     | -2.20691500 | -1.57154300 | -2.51002900 |
| H     | -0.80903400 | -0.82610800 | -1.64898400 |
| S     | 2.44299900  | -1.12526600 | -0.12023000 |
| O     | 1.08596500  | -1.63099700 | -0.11938300 |
| O     | 2.95637500  | -0.68703500 | 1.15571400  |
| O     | 2.58509100  | -0.01831400 | -1.19558000 |
| H     | 1.70204900  | 0.50913800  | -1.30772600 |
| C     | 3.53608000  | -2.34399200 | -0.77711600 |
| H     | 3.54681700  | -3.16900100 | -0.07099700 |
| H     | 3.15341300  | -2.65617900 | -1.74323100 |
| H     | 4.52073700  | -1.89520400 | -0.86488300 |

293

294

(MSA)<sub>3</sub>·(MA)<sub>2</sub>:

| Atoms | X           | Y           | Z           |
|-------|-------------|-------------|-------------|
| N     | 0.81161200  | -0.82222900 | -1.85056500 |
| H     | 0.89265000  | 0.10493900  | -1.42122000 |
| H     | 0.17907000  | -1.38783200 | -1.25578400 |
| C     | 0.22868100  | -0.74546000 | -3.20471200 |
| H     | -0.75870800 | -0.30208700 | -3.11948900 |
| H     | 0.86519900  | -0.13581600 | -3.83847800 |
| H     | 0.14529300  | -1.74819600 | -3.61138400 |

| Atoms | X           | Y           | Z           |
|-------|-------------|-------------|-------------|
| N     | 0.62135600  | 0.67595500  | 1.80677100  |
| H     | 0.07530400  | 1.54369300  | 1.78829400  |
| H     | 1.37504800  | 0.76400900  | 1.09367400  |
| C     | 1.15621200  | 0.36468800  | 3.15127900  |
| H     | 0.32542200  | 0.25388300  | 3.84149900  |
| H     | 1.73468800  | -0.54943500 | 3.08482700  |
| H     | 1.80447100  | 1.17489000  | 3.46993700  |
| S     | -2.11390700 | -1.82449300 | 0.25407300  |
| O     | -1.18528900 | -2.35854400 | -0.73860200 |
| O     | -3.17953700 | -0.99078600 | -0.37609200 |
| O     | -1.47501000 | -1.13375500 | 1.37200300  |
| H     | -0.03552100 | -0.05882100 | 1.49728800  |
| C     | -2.98071500 | -3.21256400 | 0.92483500  |
| H     | -3.68243600 | -2.83952600 | 1.66422000  |
| H     | -3.49614100 | -3.70794400 | 0.10784700  |
| H     | -2.24396800 | -3.86977100 | 1.37657100  |
| S     | 3.46928900  | -0.18155000 | -0.03773500 |
| O     | 3.37111300  | -0.69378500 | 1.32120700  |
| O     | 2.45123600  | 0.87727600  | -0.28606700 |
| O     | 3.43693200  | -1.20446900 | -1.09043300 |
| H     | 1.77152200  | -1.20681800 | -1.81147100 |
| C     | 5.04475100  | 0.62016600  | -0.18709000 |
| H     | 5.10148900  | 1.39466000  | 0.57147900  |
| H     | 5.80980900  | -0.13414000 | -0.02928500 |
| H     | 5.11693300  | 1.04270400  | -1.18431700 |
| S     | -1.80110300 | 2.03746600  | -0.13193700 |
| O     | -0.88459700 | 1.09400100  | -0.75073600 |
| O     | -1.33163000 | 2.67891100  | 1.07826300  |
| O     | -3.15780300 | 1.37960400  | 0.09970400  |
| H     | -3.14963000 | 0.29832800  | -0.10451500 |
| C     | -2.17597200 | 3.31269500  | -1.29561200 |
| H     | -2.56549200 | 2.84544100  | -2.19447600 |
| H     | -2.91356100 | 3.96705400  | -0.84103700 |
| H     | -1.25172700 | 3.84714300  | -1.49422000 |

295

296 (MSA)<sub>3</sub>·(MA)<sub>3</sub>:

| Atoms | X          | Y          | Z           |
|-------|------------|------------|-------------|
| N     | 2.91376300 | 1.57069900 | -0.43565700 |
| H     | 2.73386200 | 1.04460100 | 0.43311400  |
| H     | 2.26991500 | 2.39969800 | -0.46019100 |
| C     | 4.34508000 | 1.89122500 | -0.58031200 |
| H     | 4.91677900 | 0.96834900 | -0.54542900 |
| H     | 4.50888400 | 2.39121200 | -1.52985200 |
| H     | 4.64787500 | 2.54438800 | 0.23193000  |

| Atoms | X           | Y           | Z           |
|-------|-------------|-------------|-------------|
| N     | -0.31584900 | -1.15465800 | -1.94710900 |
| H     | -0.46152900 | -0.16188700 | -1.71295200 |
| H     | -0.80866700 | -1.64680200 | -1.17894400 |
| C     | -0.86681600 | -1.51002900 | -3.26881600 |
| H     | -0.34524100 | -0.95113600 | -4.04019000 |
| H     | -0.73340800 | -2.57452700 | -3.43652900 |
| H     | -1.92097200 | -1.25321700 | -3.26703200 |
| N     | -0.32538100 | -0.34130800 | 2.03027200  |
| H     | -0.51607100 | 0.66646200  | 1.88837900  |
| H     | 0.68957100  | -0.47551700 | 1.99821500  |
| C     | -0.94517800 | -0.84807900 | 3.26943600  |
| H     | -2.01326400 | -0.66824800 | 3.19779700  |
| H     | -0.74872300 | -1.91275800 | 3.35226100  |
| H     | -0.53153100 | -0.32195000 | 4.12451700  |
| S     | -0.12606000 | 2.44552000  | 0.07203700  |
| O     | -2.92603800 | 0.41901100  | 1.00460900  |
| O     | 0.91460100  | 3.38946700  | -0.38149900 |
| O     | -0.29222200 | 2.42487700  | 1.52529700  |
| H     | -0.72325000 | -0.84764700 | 1.22422500  |
| C     | -1.65511000 | 2.98882900  | -0.62588300 |
| H     | -1.82543000 | 3.99935800  | -0.26582900 |
| H     | -1.55947400 | 2.96788900  | -1.70710300 |
| H     | -2.42358400 | 2.30118000  | -0.28319000 |
| S     | 2.31911600  | -1.66583600 | 0.20218400  |
| O     | 1.02448100  | -2.31675300 | 0.35346400  |
| O     | 2.57357300  | -0.64585600 | 1.24252400  |
| O     | 2.53231900  | -1.13338100 | -1.16140000 |
| H     | 0.68939900  | -1.33605400 | -1.85115800 |
| C     | 3.56219500  | -2.90920100 | 0.43557500  |
| H     | 3.41071100  | -3.67609700 | -0.31791500 |
| H     | 4.53587400  | -2.44191600 | 0.32388800  |
| H     | 3.43937300  | -3.31760200 | 1.43398000  |
| S     | -2.99056500 | -0.57104200 | -0.06554500 |
| O     | -2.03132400 | -1.68628300 | 0.16580800  |
| O     | -2.85944200 | -0.02242700 | -1.41577900 |
| O     | 0.15214200  | 1.08758000  | -0.45724200 |
| H     | 2.59949700  | 0.89803600  | -1.14152600 |
| C     | -4.60105600 | -1.31651600 | 0.02429800  |
| H     | -4.66968400 | -2.07377500 | -0.75063400 |
| H     | -4.71216400 | -1.75816100 | 1.00993800  |
| H     | -5.33573700 | -0.53253200 | -0.13317100 |

297

298 (SFA)<sub>3</sub>:

| Atoms | X           | Y           | Z           |
|-------|-------------|-------------|-------------|
| S     | 0.06337000  | 2.08953700  | -0.09723500 |
| O     | -0.15395600 | 1.45280300  | 1.33737800  |
| O     | -0.04441300 | 1.01749200  | -1.06067600 |
| O     | -0.81700200 | 3.20299700  | -0.12865700 |
| N     | 1.59933900  | 2.57815300  | -0.19645700 |
| H     | 0.39982700  | 0.63825100  | 1.40691700  |
| H     | 1.86851800  | 3.20779600  | 0.54628200  |
| H     | 2.23784000  | 1.80331000  | -0.36495200 |
| S     | 2.23090000  | -1.00044900 | 0.01908600  |
| O     | 1.11422100  | -1.78949600 | -0.72159200 |
| O     | 2.86575800  | -0.08826400 | -0.88124400 |
| O     | 1.68491500  | -0.49916200 | 1.25831800  |
| N     | 3.35485300  | -2.11457900 | 0.41833100  |
| H     | 0.22532000  | -1.63839400 | -0.27562800 |
| H     | 3.84214100  | -2.43939200 | -0.40783300 |
| H     | 2.94941400  | -2.87981100 | 0.94332900  |
| S     | -2.40389800 | -1.05929100 | 0.01333000  |
| O     | -2.20023900 | -0.50155300 | -1.43875400 |
| O     | -3.41774400 | -2.04479500 | -0.08299400 |
| O     | -1.09327700 | -1.37974600 | 0.55139400  |
| N     | -2.93394500 | 0.15891600  | 0.94891700  |
| H     | -1.42544600 | 0.10894000  | -1.44170500 |
| H     | -2.20495100 | 0.82869000  | 1.17127700  |
| H     | -3.78644000 | 0.57424500  | 0.59848700  |

299

300

(SFA)<sub>3</sub>·(MA)<sub>1</sub>:

| Atoms | X           | Y           | Z           |
|-------|-------------|-------------|-------------|
| H     | 0.89701500  | -2.30972500 | -0.37448600 |
| N     | 0.05884800  | -2.06671500 | 0.16302500  |
| C     | 0.11349700  | -2.55308400 | 1.56121000  |
| H     | -0.78284400 | -2.37739300 | -0.32657800 |
| H     | 1.00508300  | -2.13948400 | 2.02071300  |
| H     | 0.15653800  | -3.63781300 | 1.56557000  |
| H     | -0.78239900 | -2.20970900 | 2.06751900  |
| S     | -0.05397900 | 1.69157400  | 0.23185300  |
| O     | -0.05146100 | 0.49691200  | -0.63684900 |
| O     | 1.19074300  | 2.44540500  | 0.03653400  |
| O     | -1.27917100 | 2.46284500  | 0.07174700  |
| N     | -0.02992100 | 1.25612600  | 1.81895100  |
| H     | 0.01720200  | -1.02386100 | 0.10807800  |
| H     | -0.86838600 | 0.72276100  | 2.02785900  |
| H     | 0.81579900  | 0.72621900  | 2.00451100  |
| S     | 2.96834600  | -0.40183700 | -0.30260100 |
| O     | 2.94821200  | 0.99594400  | -0.93590700 |



| Atoms | X           | Y           | Z           |
|-------|-------------|-------------|-------------|
| O     | 2.36751100  | -0.35609100 | 1.00986600  |
| O     | 2.48061100  | -1.39950000 | -1.21912800 |
| N     | 4.56245300  | -0.73753000 | -0.09345900 |
| H     | 2.18695000  | 1.61757600  | -0.53712300 |
| H     | 5.01462600  | 0.00579900  | 0.42589800  |
| H     | 5.00606500  | -0.86813000 | -0.99515200 |
| S     | -3.13934300 | -0.46354400 | -0.20105600 |
| O     | -3.34527300 | 1.04690200  | -0.47482100 |
| O     | -2.27320600 | -0.62405900 | 0.94409900  |
| O     | -4.41097100 | -1.10011300 | -0.23400400 |
| N     | -2.27925400 | -1.05307000 | -1.49711400 |
| H     | -2.52230700 | 1.60270600  | -0.24614200 |
| H     | -2.90929700 | -1.13907000 | -2.28640100 |
| H     | -1.51623900 | -0.40810600 | -1.70476300 |

301

302

**(SFA)<sub>3</sub>·(MA)<sub>2</sub>:**

| Atoms | X           | Y           | Z           |
|-------|-------------|-------------|-------------|
| H     | -0.44769100 | -0.36772000 | 1.30094700  |
| S     | 2.75847200  | -0.51575700 | 0.34769200  |
| O     | 2.54547700  | -1.00614000 | 1.70533400  |
| O     | 2.96802300  | -1.52013000 | -0.67365100 |
| O     | 1.68905000  | 0.42694800  | -0.06523100 |
| N     | -0.00768900 | 0.01115800  | 2.15184700  |
| H     | 0.94569500  | -0.40055100 | 2.18716400  |
| C     | -0.83538700 | -0.29280900 | 3.33939700  |
| H     | -1.81279300 | 0.16143500  | 3.20550900  |
| H     | -0.35311900 | 0.10932000  | 4.22489300  |
| H     | -0.94350900 | -1.36912000 | 3.41028100  |
| H     | 0.85374700  | -0.36365400 | -1.34206700 |
| S     | -1.91838200 | -1.94656600 | -0.08122600 |
| O     | -1.48387000 | -0.52926900 | -0.26011600 |
| O     | -1.43727300 | -2.72258300 | -1.21430700 |
| O     | -1.59625500 | -2.43800700 | 1.23806100  |
| N     | 0.36827200  | -0.68681300 | -2.20597100 |
| H     | -0.11036300 | -1.57280000 | -1.98853500 |
| C     | 1.32921600  | -0.78864300 | -3.32255700 |
| H     | 1.76129200  | 0.19299200  | -3.49317400 |
| H     | 0.81828800  | -1.13058900 | -4.21737400 |
| H     | 2.10894000  | -1.48412400 | -3.03039500 |
| N     | 4.11888200  | 0.44849200  | 0.49051500  |
| H     | 4.78452700  | -0.05630000 | 1.06536100  |
| H     | 4.52085300  | 0.57811600  | -0.43117600 |
| N     | -3.58204500 | -1.86733500 | -0.11709300 |
| H     | -3.89734700 | -1.83681600 | -1.07967400 |

| Atoms | X           | Y           | Z           |
|-------|-------------|-------------|-------------|
| H     | -3.93938400 | -2.70603100 | 0.32569900  |
| H     | 0.08976800  | 1.01844700  | 1.98144400  |
| H     | -0.35448100 | 0.01980400  | -2.35260800 |
| S     | -1.01002500 | 2.70621300  | -0.35987600 |
| O     | -2.07518500 | 1.84176800  | 0.38342000  |
| O     | -0.59697600 | 1.99830000  | -1.54316400 |
| O     | -1.51255300 | 4.03729100  | -0.42888400 |
| N     | 0.26766300  | 2.71493100  | 0.70381600  |
| H     | -1.98340800 | 0.87507500  | 0.10720200  |
| H     | 0.50340600  | 3.67464500  | 0.91963500  |
| H     | 1.05249500  | 2.19589300  | 0.30685600  |

303

304 (SFA)<sub>3</sub>·(MA)<sub>3</sub>:

| Atoms | X           | Y           | Z           |
|-------|-------------|-------------|-------------|
| H     | -1.44232900 | -1.95662000 | 0.76326700  |
| N     | -0.54015900 | -1.89680100 | 0.27057800  |
| C     | -0.65530700 | -2.55646300 | -1.05218600 |
| H     | 0.24638300  | -2.30817500 | 0.79577400  |
| H     | -1.46201600 | -2.08102400 | -1.60140800 |
| H     | -0.88185200 | -3.60689600 | -0.89678200 |
| H     | 0.29727700  | -2.45152000 | -1.56056000 |
| S     | 0.42241300  | 1.71245900  | -0.48167600 |
| O     | 0.12938600  | 0.85771400  | 0.68874600  |
| O     | -0.51308800 | 2.83804800  | -0.53817200 |
| O     | 1.82900800  | 2.09657600  | -0.54169200 |
| N     | 0.14487100  | 0.86746500  | -1.87867500 |
| H     | -0.33226000 | -0.88882500 | 0.17650700  |
| H     | 0.74970200  | 0.05026600  | -1.86488700 |
| H     | -0.83172100 | 0.58089700  | -1.88031200 |
| S     | -3.61105500 | -0.61224100 | -0.12070400 |
| O     | -4.57458000 | 0.38575600  | 0.34855700  |
| O     | -2.44609300 | 0.03287700  | -0.72859100 |
| O     | -3.26940000 | -1.61880400 | 0.87851500  |
| N     | -4.28983100 | -1.50279900 | -1.36521500 |
| H     | -3.47454900 | 1.86272400  | 0.41423900  |
| H     | -4.66710500 | -0.85765600 | -2.05089500 |
| H     | -5.05190700 | -2.04944200 | -0.97867200 |
| H     | 3.19203900  | 1.03454700  | -0.77876600 |
| N     | 4.22066900  | 0.87040200  | -0.85423400 |
| C     | 4.90338500  | 1.84524500  | 0.02658900  |
| H     | 4.48391000  | 0.98231000  | -1.82872200 |
| H     | 4.57443600  | 1.63415000  | 1.03830200  |
| H     | 4.59529400  | 2.84556400  | -0.26011700 |
| H     | 5.97946600  | 1.73043800  | -0.06012300 |

| Atoms | X           | Y           | Z           |
|-------|-------------|-------------|-------------|
| S     | 2.75946100  | -1.55089300 | 0.43324900  |
| O     | 4.18126400  | -1.77119100 | 0.18827800  |
| O     | 2.06044700  | -1.03378800 | -0.74860700 |
| O     | 2.06472800  | -2.66849200 | 1.06268400  |
| N     | 2.74388800  | -0.23346800 | 1.47718500  |
| H     | 4.40544200  | -0.11006800 | -0.56124600 |
| H     | 2.94943300  | -0.56214200 | 2.41355000  |
| H     | 1.81870700  | 0.19876600  | 1.44317300  |
| H     | -3.08804500 | 3.35440600  | 1.06353200  |
| N     | -2.74044600 | 2.41717300  | 0.88520000  |
| C     | -2.39105300 | 1.72091900  | 2.14854700  |
| H     | -1.88985600 | 2.50068300  | 0.26131200  |
| H     | -3.26422600 | 1.69658300  | 2.79291200  |
| H     | -1.56008900 | 2.23675000  | 2.61830500  |
| H     | -2.08768900 | 0.71351500  | 1.88839900  |
