# Supplementary material for: A novel formation mechanism of NH 2 SO 3 H and its enhancing effect on methanesulfonic acid-methylamine aerosol particle formation in agriculture-developed and coastal industrial areas
Source: Copernicus journal article supplement (doi:10.5194/egusphere-2024-2638), 2024-10-22
Supplement: Supplementary file [file egusphere-2024-2638-AC1-supplement.zip]

# Supporting information

-for-

## A novel formation mechanism of sulfamic acid and its enhancing effect on methanesulfonic acid-methylamine aerosol particle formation in agriculture-developed and coastal industrial areas

Hui Wang <sup>a,†</sup>, Shuqin Wei <sup>a,†</sup>, Jihuan Yang <sup>a</sup>, Yanlong Yang <sup>a</sup>, Rongrong Li <sup>a</sup>, Rui Wang <sup>a</sup>,  
Chongqin Zhu <sup>b,\*</sup>, Tianlei Zhang <sup>a,\*</sup>, Changming Zhang <sup>c</sup>,

<sup>a</sup> Shaanxi Key Laboratory of Catalysis, School of Chemical & Environment Science, Shaanxi University of Technology, Hanzhong, Shaanxi 723001, P. R. China

<sup>b</sup> College of Chemistry, Key Laboratory of Theoretical & Computational Photochemistry of Ministry of Education, Beijing Normal University, Beijing 100190, China.

<sup>c</sup> School of Mechanical Engineering, Shaanxi University of Technology, Hanzhong, Shaanxi 723001, P. R. China

| S. NO  | Caption                                                                                                                                                                                                                                                                                                                                                                                                                                                                                                                     |
|--------|-----------------------------------------------------------------------------------------------------------------------------------------------------------------------------------------------------------------------------------------------------------------------------------------------------------------------------------------------------------------------------------------------------------------------------------------------------------------------------------------------------------------------------|
| S4     | <b>Fig. S1</b> (a) The <i>z</i> coordinates of HNSO <sub>2</sub> molecule as the function of simulation time; (b) the density profile of water; (c) the pie chart with the occurrence percentages of HNSO <sub>2</sub> molecule at the air-water interface and in water phase                                                                                                                                                                                                                                               |
| S5     | <b>Fig. S2</b> The optimized geometrical structures for the species involved in the HNSO <sub>2</sub> hydrolysis at several different levels of theory.                                                                                                                                                                                                                                                                                                                                                                     |
| S6     | <b>Table S1</b> The Energy barriers ( $\Delta E$ ) and unsigned error (UE) (kcal·mol <sup>-1</sup> ) for the HNSO <sub>2</sub> hydrolysis at different theoretical the potential energy profile ( $\Delta G$ ) correction                                                                                                                                                                                                                                                                                                   |
| S7-S8  | <b>Fig. S3</b> Optimized geometries of HNSO <sub>2</sub> , H <sub>2</sub> O, <b>MSA</b> , (H <sub>2</sub> O) <sub>2</sub> , HNSO <sub>2</sub> ···H <sub>2</sub> O and <b>MSA</b> ···H <sub>2</sub> O at the M06-2X/6-311++G(2df,2pd) level (bond distances in Angstroms and angles in degrees) along with the stabilization energies of (H <sub>2</sub> O) <sub>2</sub> , HNSO <sub>2</sub> ···H <sub>2</sub> O and <b>MSA</b> ···H <sub>2</sub> O at the CCSD(T)-F12/cc-pVDZ-F12//M06-2X/6-311++G(2df,2pd) level of theory |
| S9-S10 | <b>Fig. S4</b> The optimized geometries and electric energies (in Hartree-Fock) for the complexes of HNSO <sub>2</sub> ···H <sub>2</sub> O··· <b>MSA</b> at the M06-2X/6-311++G(2df,2pd) level of theory                                                                                                                                                                                                                                                                                                                    |
| S11    | <b>Fig. S5</b> The potential energy profile ( $\Delta G$ ) for the hydrolysis reaction of HNSO <sub>2</sub> without (a) and with (b) H <sub>2</sub> O at the CCSD(T)-F12/cc-pVDZ-F12//M06-2X/6-311++G(2df,2pd) level of theory                                                                                                                                                                                                                                                                                              |
| S12    | <b>Table S2</b> Zero point energy (ZPE/(kcal·mol <sup>-1</sup> )), entropies (S/(cal·mol <sup>-1</sup> ·K <sup>-1</sup> )), relative energies ( $\Delta E$ and $\Delta(E + ZPE)$ /(kcal·mol <sup>-1</sup> )), enthalpies ( $\Delta H(298)$ /(kcal·mol <sup>-1</sup> )), and free energies ( $\Delta G(298)$ /(kcal·mol <sup>-1</sup> )) for the hydrolysis reaction of HNSO <sub>2</sub> without and with H <sub>2</sub> O and <b>MSA</b>                                                                                   |
| S13    | <b>Table S3</b> Equilibrium constants (cm <sup>3</sup> ·molecule <sup>-1</sup> ) for the HNSO <sub>2</sub> ···H <sub>2</sub> O, H <sub>2</sub> O···H <sub>2</sub> O, and <b>MSA</b> ···H <sub>2</sub> O complexes within the temperature range of 212.6-320.0 K                                                                                                                                                                                                                                                             |

\* Corresponding authors, Tel: +86-0916-2641083, Fax: +86-0916-2641083.  
E-mail: [cqzhu@bnu.edu.cn](mailto:cqzhu@bnu.edu.cn) (C. Q. Zhu), [ztianlei88@163.com](mailto:ztianlei88@163.com) (T. L. Zhang).

<sup>†</sup> These authors contributed equally to this work.

|         |                                                                                                                                                                                                                                                                                                                                                                                                                                                                                                                                    |
|---------|------------------------------------------------------------------------------------------------------------------------------------------------------------------------------------------------------------------------------------------------------------------------------------------------------------------------------------------------------------------------------------------------------------------------------------------------------------------------------------------------------------------------------------|
| S14     | <b>Table S4</b> The high-pressure limiting rate constant ( $\text{cm}^3 \cdot \text{molecule}^{-1} \cdot \text{s}^{-1}$ ) for the hydrolysis reaction of $\text{HNSO}_2$ with $\text{H}_2\text{O}$ and <b>MSA</b> within the temperature range of 212.6-320.0 K                                                                                                                                                                                                                                                                    |
| S15-S17 | <b>Part S1. Calculations of reaction rate coefficients</b>                                                                                                                                                                                                                                                                                                                                                                                                                                                                         |
| S18     | <b>Table S5</b> Rate coefficients ( $k$ , $\text{cm}^3 \cdot \text{molecule}^{-1} \cdot \text{s}^{-1}$ ) for the hydrolysis of $\text{HNSO}_2$ by master equation within the temperature range of 212.6-320.0 K                                                                                                                                                                                                                                                                                                                    |
| S19     | <b>Table S6</b> Concentrations ( $\text{molecules} \cdot \text{cm}^{-3}$ ) of $\text{H}_2\text{O}$ and <b>MSA</b> within the temperature range of 213-320 K and altitude range of 0-15 km                                                                                                                                                                                                                                                                                                                                          |
| S20     | <b>Fig. S7</b> The dynamic trajectories of <b>MSA</b> -assisted gaseous hydrolysis of $\text{HNSO}_2$                                                                                                                                                                                                                                                                                                                                                                                                                              |
| S21     | <b>Fig. S8</b> (a) The $z$ coordinates of MSA molecule as the function of simulation time; (b) the density profile of water; (c) the pie chart with the occurrence percentages of MSA molecule at the air-water interface and in water phase                                                                                                                                                                                                                                                                                       |
| S22     | <b>Fig. S9</b> (a) The $z$ coordinates of complex $\text{HNSO}_2 \cdots \text{MSA}$ as the function of simulation time; (b) the density profile of water; (c) the pie chart with the occurrence percentages of complex $\text{HNSO}_2 \cdots \text{MSA}$ at the air-water interface and in water phase                                                                                                                                                                                                                             |
| S23     | <b>Fig. S10</b> Snapshot structures taken from the BOMD simulations of $\text{HNSO}_2$ reaction at the air-water interface                                                                                                                                                                                                                                                                                                                                                                                                         |
| S24     | <b>Fig. S11</b> Snapshot structures taken from the BOMD simulations of <b>MSA</b> reaction at the air-water interface                                                                                                                                                                                                                                                                                                                                                                                                              |
| S25-S28 | <b>Fig. S12</b> BOMD simulation trajectories and snapshots of <b>MSA</b> <sup>-</sup> and $\text{H}_3\text{O}^+$ ions forming mechanism via the chain structure routes in <b>MSA</b> -mediated hydration $\text{HNSO}_2$ at the air-water interface                                                                                                                                                                                                                                                                                |
| S29-S31 | <b>Fig. S13</b> BOMD simulation trajectories and snapshots of <b>MSA</b> <sup>-</sup> and $\text{H}_3\text{O}^+$ ions forming mechanism via loop structure routes in <b>MSA</b> -mediated hydration $\text{HNSO}_2$ at the air-water interface                                                                                                                                                                                                                                                                                     |
| S32-S33 | <b>Fig. S14</b> BOMD simulation trajectories and snapshots of proton exchange mechanism in <b>MSA</b> -mediated hydration $\text{HNSO}_2$ with a water molecule at the air-water interface                                                                                                                                                                                                                                                                                                                                         |
| S34-S40 | <b>Fig. S15</b> BOMD simulation trajectories and snapshots of proton exchange mechanism in <b>MSA</b> -mediated hydration $\text{HNSO}_2$ with two water molecules at the air-water interface                                                                                                                                                                                                                                                                                                                                      |
| S40-S42 | <b>Fig. S16</b> BOMD simulation trajectories and snapshots of proton exchange mechanism in <b>MSA</b> -mediated hydration $\text{HNSO}_2$ with three water molecules at the air-water interface                                                                                                                                                                                                                                                                                                                                    |
| S43     | <b>Part S2. Configurational sampling</b>                                                                                                                                                                                                                                                                                                                                                                                                                                                                                           |
| S44     | <b>Fig. S17</b> The optimized geometries of the important precursors of atmospheric aerosol nucleation (MSA, MA and SFA), especially the main bond lengths and bond angles at two different theoretical levels. SFA, MSA and MA are the shorthand for formic acid, sulfuric acid and ammonia, respectively. <sup>a</sup> The values obtained at the M06-2X/6-311++G(2df,2pd) level of theory. <sup>b</sup> The values obtained at the M06-2X/6-311++G(3df,3pd) level of theory. Bond length is in angstrom and angle is in degree. |
| S45     | <b>Table S7</b> Comparison of calculated formation free energies ( $\Delta G$ ) at the M06-2X/6-311++G(2df,2pd) and the M06-2X/6-311++G(3df,3pd) levels                                                                                                                                                                                                                                                                                                                                                                            |
| S46     | <b>Fig. S18</b> The most stable configurations of the SFA-MSA-MA-based clusters identified at the M06-2X/6-311++G(2df,2pd) level of theory. The lengths of hydrogen bonds are given in Å (Color code: blue = nitrogen, yellow = sulfur, red = oxygen, gray = carbon, and white = hydrogen)                                                                                                                                                                                                                                         |
| S47     | <b>Fig. S19</b> (a) The $J$ ( $\text{cm}^{-3} \text{s}^{-1}$ ) and (b) $R$ as a function of [MSA] with [SFA] = $10^8$ molecules $\text{cm}^{-3}$ and three different [MA] (black line: [MA] = $2.5 \times 10^7$ molecules $\text{cm}^{-3}$ , red line: [MA] = $2.5 \times 10^8$ molecules $\text{cm}^{-3}$ , blue line: [MA] = $2.5 \times 10^9$ molecules $\text{cm}^{-3}$ ) at 238.15 K                                                                                                                                          |

|         |                                                                                                                                                                                                                                                                                                                                                                                                                                         |
|---------|-----------------------------------------------------------------------------------------------------------------------------------------------------------------------------------------------------------------------------------------------------------------------------------------------------------------------------------------------------------------------------------------------------------------------------------------|
| S48     | <b>Fig. S20</b> (a) The $J$ ( $\text{cm}^{-3} \text{s}^{-1}$ ) and (b) $R$ as a function of $[\text{MSA}]$ with $[\text{SFA}] = 10^8$ molecules $\text{cm}^{-3}$ and three different $[\text{MA}]$ (black line: $[\text{MA}] = 2.5 \times 10^7$ molecules $\text{cm}^{-3}$ , red line: $[\text{MA}] = 2.5 \times 10^8$ molecules $\text{cm}^{-3}$ , blue line: $[\text{MA}] = 2.5 \times 10^9$ molecules $\text{cm}^{-3}$ ) at 258.15 K |
| S49     | <b>Fig. S21</b> (a) The $J$ ( $\text{cm}^{-3} \text{s}^{-1}$ ) and (b) $R$ as a function of $[\text{MSA}]$ with $[\text{SFA}] = 10^8$ molecules $\text{cm}^{-3}$ and three different $[\text{MA}]$ (black line: $[\text{MA}] = 2.5 \times 10^7$ molecules $\text{cm}^{-3}$ , red line: $[\text{MA}] = 2.5 \times 10^8$ molecules $\text{cm}^{-3}$ , blue line: $[\text{MA}] = 2.5 \times 10^9$ molecules $\text{cm}^{-3}$ ) at 298.15 K |
| S50     | <b>Fig. S22.</b> The influence of $[\text{MA}]$ on the relative contribution of the pure MSA-MA-based clustering pathway and the SFA participation pathway to the system flux is analyzed at 278.15 K, $[\text{MSA}] = 10^7$ molecules $\cdot \text{cm}^{-3}$ and $[\text{SFA}] = 10^4, 10^6$ and $10^8$ molecules $\cdot \text{cm}^{-3}$ .                                                                                             |
| S51     | <b>Fig. S23</b> Main cluster formation mechanism of MSA-MA-SFA-based system at 238.15 K, $[\text{MSA}] = 10^7$ molecules $\cdot \text{cm}^{-3}$ , $[\text{MA}] = 2.5 \times 10^8$ molecules $\cdot \text{cm}^{-3}$ , and $[\text{SFA}] = 10^6$ molecules $\cdot \text{cm}^{-3}$ . The black arrows indicate the pure MSA-MA-based growth pathways. Blue arrows represent the pathways containing SFA                                    |
| S52     | <b>Fig. S24</b> Main cluster formation mechanism of MSA-MA-SFA-based system at 258.15 K, $[\text{MSA}] = 10^7$ molecules $\cdot \text{cm}^{-3}$ , $[\text{MA}] = 2.5 \times 10^8$ molecules $\cdot \text{cm}^{-3}$ , and $[\text{SFA}] = 10^6$ molecules $\cdot \text{cm}^{-3}$ . The black arrows indicate the pure MSA-MA-based growth pathways. Blue arrows represent the pathways containing SFA                                    |
| S53     | <b>Fig. S25</b> Main cluster formation mechanism of MSA-MA-SFA-based system at 298.15 K, $[\text{MSA}] = 10^7$ molecules $\cdot \text{cm}^{-3}$ , $[\text{MA}] = 2.5 \times 10^8$ molecules $\cdot \text{cm}^{-3}$ , and $[\text{SFA}] = 10^6$ molecules $\cdot \text{cm}^{-3}$ . The black arrows indicate the pure MSA-MA-based growth pathways. Blue arrows represent the pathways containing SFA                                    |
| S54     | <b>Table S8</b> The Gibbs free energy for the formation of $(\text{SFA})_x(\text{MSA})_y(\text{MA})_z$ ( $z \leq x + y \leq 3$ ) clusters $\Delta G$ ( $\text{kcal} \cdot \text{mol}^{-1}$ ) at pressure of 1 atm and temperatures of 298.15, 278.15, 258.15 and 238.15 K                                                                                                                                                               |
| S55-S56 | <b>Table S9</b> Evaporation rates $\gamma$ ( $\text{s}^{-1}$ ) for the studied clusters at different temperatures of 298.15, 278.15, 258.15 and 238.15 K                                                                                                                                                                                                                                                                                |
| S57-S58 | <b>Table S10</b> Collision coefficients ( $\beta$ , $\text{cm}^3 \cdot \text{s}^{-1}$ ) for each cluster in the present study                                                                                                                                                                                                                                                                                                           |
| S59     | <b>Table S11</b> Total evaporation coefficients ( $\sum \gamma$ , $\text{s}^{-1}$ ) for each cluster in the present study                                                                                                                                                                                                                                                                                                               |
| S60-S61 | <b>Table S12</b> Ratios ( $\beta \cdot C / \sum \gamma$ ) between monomer molecule collisions and evaporation coefficients for each cluster involving SFA in the present study ( $[\text{MSA}] = 1.0 \times 10^7$ molecules $\cdot \text{cm}^{-3}$ , $[\text{MA}] = 2.5 \times 10^7$ molecules $\cdot \text{cm}^{-3}$ , $[\text{SFA}] = 1.0 \times 10^7$ molecules $\cdot \text{cm}^{-3}$ )                                             |
| S62     | <b>Table S13</b> The formation rate $J$ of MSA at the conditions of $T = 238.15$ K, $[\text{MSA}] = 10^6$ - $10^8$ molecules $\cdot \text{cm}^{-3}$ , $[\text{MA}] = 10^7$ - $10^{11}$ molecules $\cdot \text{cm}^{-3}$ , and $[\text{SFA}] = 0, 10^8$ - $10^{12}$ molecules $\cdot \text{cm}^{-3}$ . MSA, MA and SFA represent methanesulfonic acid, methylamine and sulfamic acid, respectively                                       |
| S63     | <b>Table S14</b> The formation rate $J$ of MSA at the conditions of $T = 258.15$ K, $[\text{MSA}] = 10^6$ - $10^8$ molecules $\cdot \text{cm}^{-3}$ , $[\text{MA}] = 10^7$ - $10^{11}$ molecules $\cdot \text{cm}^{-3}$ , and $[\text{SFA}] = 0, 10^8$ - $10^{12}$ molecules $\cdot \text{cm}^{-3}$ . MSA, MA and SFA represent methanesulfonic acid, methylamine and sulfamic acid, respectively                                       |
| S64     | <b>Table S15</b> The formation rate $J$ of MSA at the conditions of $T = 278.15$ K, $[\text{MSA}] = 10^6$ - $10^8$ molecules $\cdot \text{cm}^{-3}$ , $[\text{MA}] = 10^7$ - $10^{11}$ molecules $\cdot \text{cm}^{-3}$ , and $[\text{SFA}] = 0, 10^8$ - $10^{12}$ molecules $\cdot \text{cm}^{-3}$ . MSA, MA and SFA represent methanesulfonic acid, methylamine and sulfamic acid, respectively                                       |
| S65     | <b>Table S16</b> The formation rate $J$ of MSA at the conditions of $T = 298.15$ K, $[\text{MSA}] = 10^6$ - $10^8$ molecules $\cdot \text{cm}^{-3}$ , $[\text{MA}] = 10^7$ - $10^{11}$ molecules $\cdot \text{cm}^{-3}$ , and $[\text{SFA}] = 0, 10^8$ - $10^{12}$ molecules $\cdot \text{cm}^{-3}$ . MSA, MA and SFA represent methanesulfonic acid, methylamine and sulfamic acid, respectively                                       |
| S66-S87 | <b>Table S17</b> Cartesian coordinates of all molecules and clusters in the studied system                                                                                                                                                                                                                                                                                                                                              |

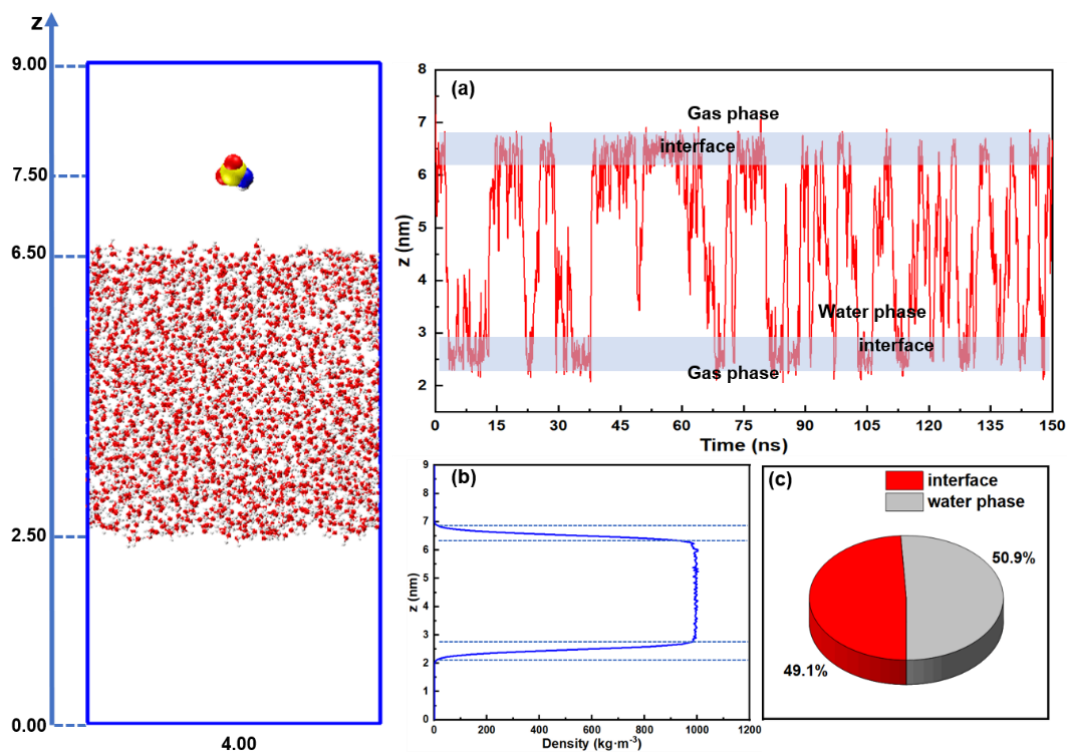

**Fig. S1** (a) The  $z$  coordinates of HNSO<sub>2</sub> molecule as the function of simulation time; (b) the density profile of water; (c) the pie chart with the occurrence percentages of HNSO<sub>2</sub> molecule at the air-water interface and in water phase



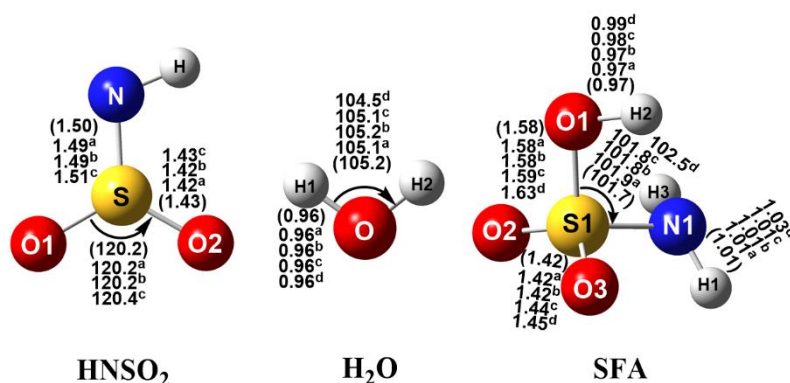

**Fig. S2** The optimized geometrical structures for the species involved in the HNSO<sub>2</sub> hydrolysis at several different levels of theory.

a, b and, c respectively represents the values obtained at the M06-2X/6-311++G(3df,2pd), M062X/6-311++G(3df,3pd) and M06-2X/aug-cc-pVTZ level of theory, <sup>d</sup> represents the experimental values (The values in parentheses were obtained at the M06-2X/6-311++G(2df,2pd) level of theory; bond length is in angstrom and angle is in degree.).

The geometric parameters of the reactants of HNSO<sub>2</sub>, H<sub>2</sub>O and NH<sub>2</sub>SO<sub>3</sub>H (SFA) have been displayed in Fig. S2. As seen in Fig. S2, the mean absolute deviation of calculated bond distances and bond angles between the M06-2X/6-311++G(2df,2pd) level and the experimental reports were 0.02 Å and 0.57°, respectively. This reveals that the calculated bond distances and bond angles at the M06-2X/6-311++G(2df,2pd) level agree well with the available experimental values (From the pubchem database, <https://pubchem.ncbi.nlm.nih.gov/#opennewwindow>). In addition, we have re-optimized all equilibrium structures of HNSO<sub>2</sub>, H<sub>2</sub>O and SFA at three different theoretical levels of M06-2X/6-311++G(3df,2pd), M062X/6-311++G(3df,3pd) and M06-2X/aug-cc-pVTZ levels. For the calculated geometrical parameters of these species, the mean absolute deviation of calculated bond distances and bond angles between the M06-2X/6-311++G(2df,2pd) level and the other levels were within 0.02 Å and 0.2°, respectively. Therefore, due to its efficiency, the M06-2X/6-311++G(2df,2pd) was adopted to optimize the geometries of all stationary points involved in the HNSO<sub>2</sub> hydrolysis.

**Table S1** The Energy barriers ( $\Delta E$ ) and unsigned error (UE) ( $\text{kcal}\cdot\text{mol}^{-1}$ ) for the  $\text{HNSO}_2$  hydrolysis at different theoretical the potential energy profile ( $\Delta G$ ) correction

| Methods                                               | $\Delta E^a$ | $\Delta E^b$ | $\Delta E^c$ | UE   |
|-------------------------------------------------------|--------------|--------------|--------------|------|
| CCSD(T)/CBS//M06-2X/<br>6-311++G(2df,2pd)             | 3.4          | 29.7         | -23.0        | 0.00 |
| CCSD(T)-F12/cc-pVDZ-F12//M06-2X/<br>6-311++G(2df,2pd) | 3.6          | 30.6         | -22.0        | 0.71 |

<sup>a</sup>, <sup>b</sup> and <sup>c</sup> respectively denote the species of pre-reactive complexes, transition states and products involved in the  $\text{HNSO}_2$  hydrolysis.

To further confirm the reliability of the CCSD(T)-F12/cc-pVDZ-F12//M06-2X/6-311++G(2df,2pd) level of theory, single-point energy calculations for the  $\text{HNSO}_2$  hydrolysis in the gas phase have been performed at two different levels of CCSD(T)/CBS and CCSD(T)-F12/cc-pVDZ-F12 based on the optimized geometries at the M06-2X/6-311++G(2df,2pd) level. Notably, the complete basis set (CBS) obtained by basis set extrapolation is used as the reference basis set. As presented in Table S1, compared with unsigned error calculated at the CCSD(T)/CBS//M06-2X/6-311++G(2df,2pd) level, unsigned errors calculated at CCSD(T)-F12/cc-pVDZ-F12//M06-2X/6-311++G(2df,2pd) was 0.71  $\text{kcal}\cdot\text{mol}^{-1}$ . This suggests that the relative energies obtained at the CCSD(T)/aug-cc-pVDZ//M06-2X/6-311+G(2df,2pd) level was reasonable. Considering the computational accuracy and cost, the CCSD(T)/aug-cc-pVDZ//M06-2X/6-311+G(2df,2pd) method was chosen to calculate the single point energies of all the species involved in the  $\text{HNSO}_2$  hydrolysis.

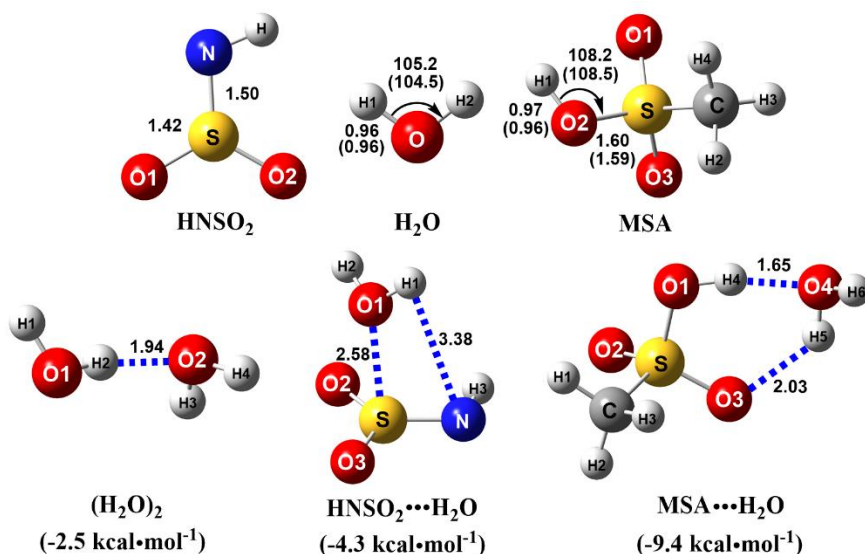

**Fig. S3** Optimized geometries of HNSO<sub>2</sub>, H<sub>2</sub>O, **MSA**, (H<sub>2</sub>O)<sub>2</sub>, HNSO<sub>2</sub>...H<sub>2</sub>O and **MSA**...H<sub>2</sub>O at the M06-2X/6-311++G(2df,2pd) level (bond distances in Angstroms and angles in degrees) along with the stabilization energies of (H<sub>2</sub>O)<sub>2</sub>, HNSO<sub>2</sub>...H<sub>2</sub>O and **MSA**...H<sub>2</sub>O at the CCSD(T)-F12/cc-pVDZ-F12//M06-2X/6-311++G(2df,2pd) level of theory

Fig. S2 illustrated the optimized geometries of monomer reactants of HNSO<sub>2</sub>, H<sub>2</sub>O and **MSA**, which were consistent with the available experimental bond lengths (Å) and bond angles. The mean absolute deviation of bond lengths (Å) and bond angles (°) between the calculations at the M06-2X/6-311++G(2df,2pd) level and the experimental values<sup>1, 2, 3</sup> were less than 0.01 Å and 0.5°, respectively. As for the dimer reactant of (H<sub>2</sub>O)<sub>2</sub>, single hydrogen bond geometry has been obtained, which was in good agreement with the previous reports<sup>4,5</sup> HNSO<sub>2</sub>...H<sub>2</sub>O and **MSA**...H<sub>2</sub>O displayed cage-like structures, and these geometrical structures were in good agreement with earlier findings<sup>6</sup>. The stabilization energies of (H<sub>2</sub>O)<sub>2</sub>, **MSA**...H<sub>2</sub>O with respect to the isolated reactants were in the range of -2.5 to -9.4 kcal·mol<sup>-1</sup>, and these energy values matched well with the earlier findings<sup>7</sup>.

1. Méndez, M., Francisco, J. S., and Dixon, D. A.: Thermodynamic properties of the isomers of [HNOS], [HNO<sub>2</sub>S], and [HNOS<sub>2</sub>] and the role of the central sulfur, *Chem. Eur. J.*, 20, 10231-10235, 2014
2. Mallick, S., Sarkar, S., Bandyopadhyay, B., and Kumar, P.: Effect of ammonia and formic acid on the OH• + HCl reaction in the troposphere: competition between single and double hydrogen atom transfer pathways, *J. Phys. Chem. A*, 122, 350-363, 2018.
3. Ning, A., Liu, L., Ji, L., and Zhang, X.: Molecular-level nucleation mechanism of iodic acid and methanesulfonic acid, *Atmospheric Chem. Phys.*, 22, 6103-6114, 2022.
4. Sarkar, S., Mallick, S., Kumar, P., and Bandyopadhyay, B.: Isomerization of methoxy radical in the troposphere: Competition between acidic, neutral and basic catalysts, *Phys. Chem. Chem. Phys.*, 19, 27848-27858, 2017.
5. Zhang, T., Zhang, Y., Tian, S., Zhou, M., Liu, D., Lin, L., Zhang, Q., Wang, R., and Muthiah, B.: Possible atmospheric source of NH<sub>2</sub>SO<sub>3</sub>H: the hydrolysis of HNSO<sub>2</sub> in the presence of neutral, basic, and acidic catalysts,

- 79 Phys. Chem. Chem. Phys., 24, 4966-4977, 2022.
- 80 6. Manonmani, G., Sandhiya, L., and Senthilkumar, K.: Hydrolysis of HNSO<sub>2</sub>: A potential route for atmospheric
- 81 production of H<sub>2</sub>SO<sub>4</sub> and NH<sub>3</sub>, Int. J. Quantum Chem, 120, e26182, 2020.
- 82 7. Bandyopadhyay, B., Kumar, P., and Biswas, P.: Ammonia catalyzed formation of sulfuric acid in
- 83 troposphere: the curious case of a base promoting acid rain, J. Phys. Chem. A, 121, 3101-3108, 2017.
- 84

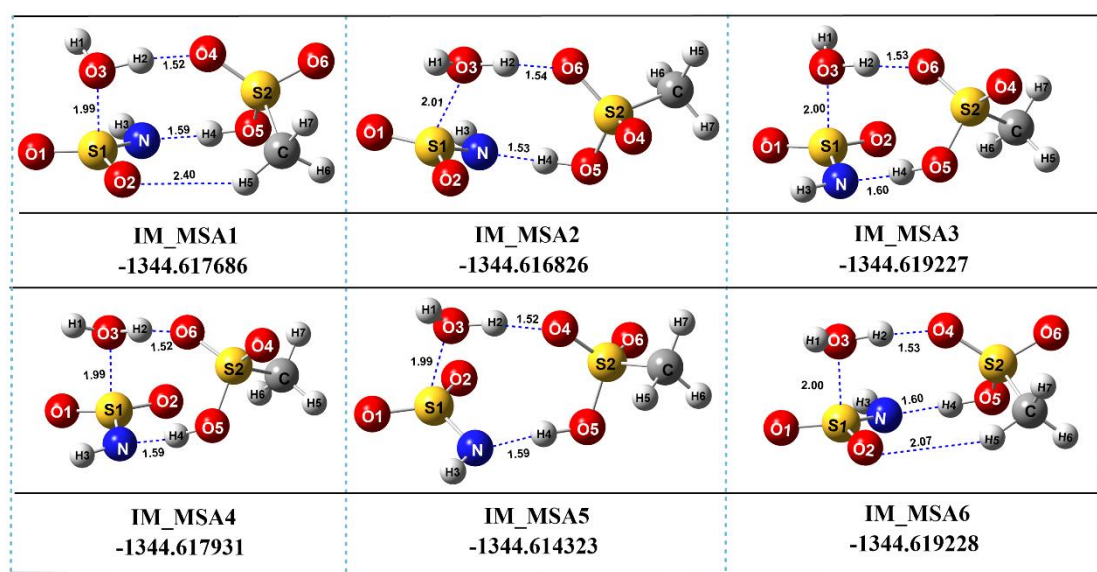

**Fig. S4** The optimized geometries and electric energies (in Hartree-Fock) for the complexes of  $\text{HNSO}_2 \cdots \text{H}_2\text{O} \cdots \text{MSA}$  at the M06-2X/6-311++G(2df,2pd) level of theory

To obtain the most stable configurations of  $\text{HNSO}_2 \cdots \text{H}_2\text{O} \cdots \text{MSA}$ , 500 auto-generated structures were produced by ABCcluster<sup>1,2</sup> software with TIP4P model<sup>3,4</sup> for  $\text{H}_2\text{O}$  and CHARMM force field<sup>5</sup> for  $\text{HNSO}_2$  and **MSA**. The generated structures were firstly optimized at the semi-empirical PM7 level by using MOPAC 2016<sup>6,7</sup>. Then, only structures with the following characteristics were selected and were optimized at the M06-2X/6-311++G(*d,p*) level: (i) the structures contains the  $\text{S}(\text{HNSO}_2) \cdots \text{O}(\text{H}_2\text{O})$  interaction of electron donor-acceptor (EDA); (ii) the structures facilitate the transfer of hydrogen atom from  $\text{H}_2\text{O}$  to  $\text{HNSO}_2$ . Subsequently, more than 50 isomers with an order of electronic energies were selected for geometry optimization by a relatively high level of M06-2X/6-311G(2*d*,2*p*). Finally, the global minimum isomers within 6.0 kcal·mol<sup>-1</sup> were re-optimized by the M06-2X/6-311++G(2*df*,2*pd*) level. As for the reactant complex  $\text{HNSO}_2 \cdots \text{H}_2\text{O} \cdots \text{MSA}$  its optimized geometries and stabilization energies have been illustrated in Fig. S2. As seen in Fig. S2, seven geometric isomers of  $\text{HNSO}_2 \cdots \text{H}_2\text{O} \cdots \text{MSA}$  (labeled as IM\_MSA*n*, *n* = 1-6) have been optimized at the M06-2X/6-311++G(2*df*,2*pd*) level, where complex IM\_MSA1 is the most favorable complex with its binding energy larger by 0.8-3.1 kcal·mol<sup>-1</sup> than the other isomers. Based on the stable complex IM\_MSA1, Fig. 1 shows the favorable PES profile for the the hydrolysis reaction of  $\text{HNSO}_2$  with **MSA**.

1. Zhang, J. and Dolg, M.: AB Cluster: the artificial bee colony algorithm for cluster global optimization, Phys. Chem. Chem. Phys., 17, 24173-24181, 2015.
2. Zhang, J. and Dolg, M.: Global optimization of clusters of rigid molecules using the artificial bee colony

- algorithm, *Phys. Chem. Chem. Phys.*, 18, 3003-3010, 2016.
3. Jorgensen, W. L., Chandrasekhar, J., Madura, J. D., Impey, R. W., and Klein, M. L.: Comparison of simple potential functions for simulating liquid water, *J. Chem. Phys.*, 79, 1983.
4. Wales, D. J. and Hodges, M. P.: Global minima of water clusters (H<sub>2</sub>O)<sub>n</sub>,  $n \leq 21$ , described by an empirical potential, *Chem. Phys. Lett.*, 286, 65-72, 1998.
5. MacKerell, A. D., Bashford, D., Bellott, M., Dunbrack, R. L., Evanseck, J. D., Field, M. J., Fischer, S., Gao, J., Guo, H., Ha, S., Joseph-McCarthy, D., Kuchnir, L., Kuczera, K., Lau, F. T. K., Mattos, C., Michnick, S., Ngo, T., Nguyen, D. T., Prodhom, B., Reiher, W. E., Roux, B., Schlenkrich, M., Smith, J. C., Stote, R., Straub, J., Watanabe, M., Wiórkiewicz-Kuczera, J., Yin, D., and Karplus, M.: All-atom empirical potential for molecular modeling and dynamics studies of proteins, *J. Phys. Chem. B*, 102, 3586-3616, 1998.
6. Rozanska, X., Stewart, J. J. P., Ungerer, P., Leblanc, B., Freeman, C., Saxe, P., and Wimmer, E.: High-throughput calculations of molecular properties in the medea environment: accuracy of PM7 in predicting vibrational frequencies, ideal gas entropies, heat capacities, and gibbs free energies of organic molecules, *J. Chem. Eng. Data*, 59, 3136-3143, 2014.
7. Stewart, J. J. P.: Optimization of parameters for semiempirical methods VI: more modifications to the NDDO approximations and re-optimization of parameters, *J. Mol. Model.*, 19, 1-32, 2013.



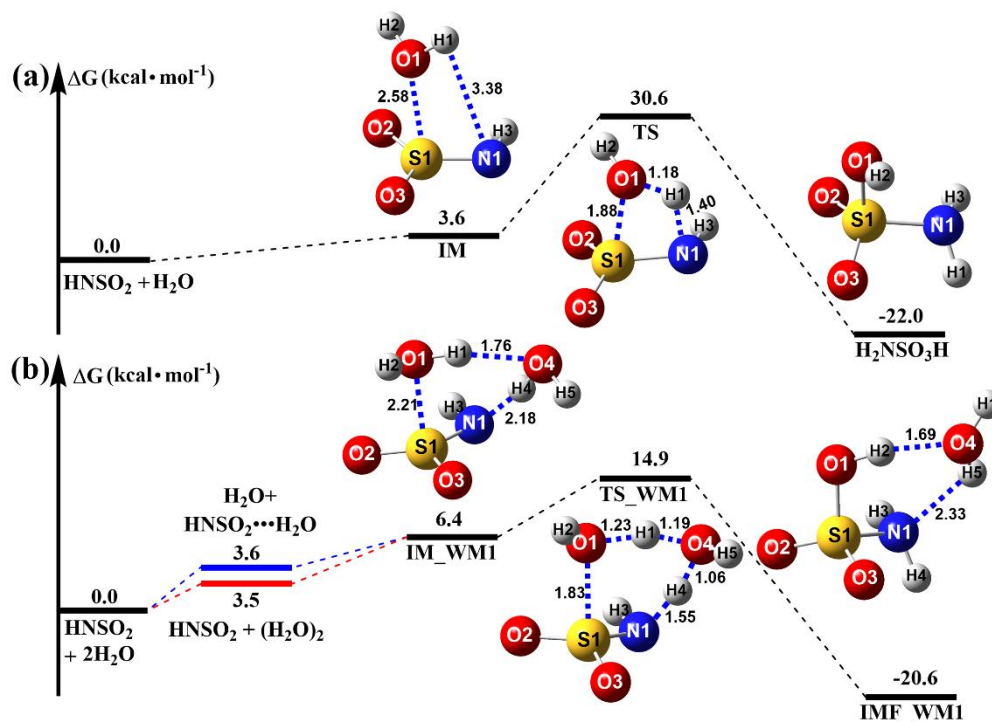

**Fig. S5** The potential energy profile ( $\Delta G$ ) for the hydrolysis reaction of  $\text{HNSO}_2$  without (a) and with (b)  $\text{H}_2\text{O}$  at the CCSD(T)-F12/cc-pVDZ-F12//M06-2X/6-311++G(2df,2pd) level of theory

**Table S2** Zero point energy (ZPE/(kcal·mol<sup>-1</sup>)), entropies (S/(cal·mol<sup>-1</sup>·K<sup>-1</sup>)), relative energies ( $\Delta E$  and  $\Delta(E + \text{ZPE})$ /(kcal·mol<sup>-1</sup>)), enthalpies ( $\Delta H(298)$ /(kcal·mol<sup>-1</sup>)), and free energies ( $\Delta G(298)$ /(kcal·mol<sup>-1</sup>)) for the hydrolysis reaction of HNSO<sub>2</sub> without and with H<sub>2</sub>O and **MSA**

| <i>Species</i>                                           | ZPE  | $\Delta E$                    | S     | $\Delta G$ | $\Delta(E + \text{ZPE})$ | $\Delta H$ |
|----------------------------------------------------------|------|-------------------------------|-------|------------|--------------------------|------------|
| HNSO <sub>2</sub> + H <sub>2</sub> O                     | 28.7 | 0.0                           | 110.6 | 0.0        | 0.0                      | 0.0        |
| IM                                                       | 30.3 | -6.0                          | 83.2  | 3.6        | -4.4                     | -4.5       |
| TS                                                       | 29.2 | 20.2                          | 71.9  | 30.6       | 20.6                     | 19.1       |
| IMF                                                      | 32.8 | -35.9                         | 73.2  | -22.0      | -31.8                    | -33.2      |
| HNSO <sub>2</sub> + 2H <sub>2</sub> O                    | 42.3 | 0.0                           | 155.7 | 0.0        | 0.0                      | 0.0        |
| HNSO <sub>2</sub> + (H <sub>2</sub> O) <sub>2</sub>      | 44.8 | -5.0                          | 133.2 | 3.5        | -2.5                     | -3.2       |
| HNSO <sub>2</sub> ···H <sub>2</sub> O + H <sub>2</sub> O | 43.9 | -6.0                          | 128.3 | 3.6        | -4.4                     | -4.5       |
| IM_WM1                                                   | 47.5 | -17.1<br>(-20.3) <sup>a</sup> | 89.1  | 6.4        | -11.9                    | -13.5      |
| TS_WM1                                                   | 45.8 | -8.2<br>(-12.1) <sup>a</sup>  | 79.8  | 14.9       | -4.7                     | -7.7       |
| IMF_WM1                                                  | 48.7 | -45.4<br>(-42.9) <sup>a</sup> | 87.1  | -20.6      | -39.0                    | -41.0      |
| HNSO <sub>2</sub> + H <sub>2</sub> O + <b>MSA</b>        | 68.2 | 0.0                           | 185.4 | 0.0        | 0.0                      | 0.0        |
| HNSO <sub>2</sub> + <b>MSA</b> ···H <sub>2</sub> O       | 70.5 | -11.7                         | 154.1 | -0.9       | -9.4                     | -10.2      |
| HNSO <sub>2</sub> ···H <sub>2</sub> O + <b>MSA</b>       | 69.7 | -6.0                          | 158.0 | 3.6        | -4.4                     | -4.5       |
| IM_MSA1                                                  | 72.4 | -25.2                         | 107.3 | 0.8        | -21.0                    | -22.5      |
| TS_MSA1                                                  | 70.1 | -22.9                         | 102.6 | 1.6        | -20.9                    | -23.1      |
| IMF_MSA1                                                 | 73.5 | -49.3                         | 109.5 | -22.6      | -44.0                    | -45.3      |

<sup>a</sup> The value was taken from reference (Manonmani, G., Sandhiya, L., and Senthilkumar, K.: Hydrolysis of HNSO<sub>2</sub>: A potential route for atmospheric production of H<sub>2</sub>SO<sub>4</sub> and NH<sub>3</sub>, Int J Quantum Chem, 120, e26182, 2020.)

**Table S3** Equilibrium constants ( $\text{cm}^3 \cdot \text{molecule}^{-1}$ ) for the  $\text{HNSO}_2 \cdots \text{H}_2\text{O}$ ,  $\text{H}_2\text{O} \cdots \text{H}_2\text{O}$ , and  $\text{MSA} \cdots \text{H}_2\text{O}$  complexes within the temperature range of 212.6-320.0 K

| $T/\text{K}$ | $\text{HNSO}_2 \cdots \text{H}_2\text{O}$ | $\text{H}_2\text{O} \cdots \text{H}_2\text{O}$                    | $\text{MSA} \cdots \text{H}_2\text{O}$ |
|--------------|-------------------------------------------|-------------------------------------------------------------------|----------------------------------------|
| 212.6        | $7.34 \times 10^{-21}$                    | $7.04 \times 10^{-22}$                                            | $3.71 \times 10^{-16}$                 |
| 229.7        | $3.55 \times 10^{-21}$                    | $4.32 \times 10^{-22}$                                            | $6.80 \times 10^{-17}$                 |
| 259.3        | $1.32 \times 10^{-21}$                    | $2.22 \times 10^{-22}$                                            | $5.90 \times 10^{-18}$                 |
| 280.0        | $7.43 \times 10^{-22}$                    | $1.51 \times 10^{-22}$                                            | $1.56 \times 10^{-18}$                 |
| 290.0        | $5.85 \times 10^{-22}$                    | $1.29 \times 10^{-22}$                                            | $8.61 \times 10^{-19}$                 |
| 298.15       | $4.90 \times 10^{-22}$                    | $1.14 \times 10^{-22}$<br>( $2.34 \times 10^{-21}$ ) <sup>a</sup> | $5.52 \times 10^{-19}$                 |
| 300.0        | $4.70 \times 10^{-22}$                    | $1.11 \times 10^{-22}$                                            | $4.95 \times 10^{-19}$                 |
| 310.0        | $3.84 \times 10^{-22}$                    | $9.69 \times 10^{-23}$                                            | $2.96 \times 10^{-19}$                 |
| 320.0        | $3.18 \times 10^{-22}$                    | $8.56 \times 10^{-23}$                                            | $1.83 \times 10^{-19}$                 |

<sup>a</sup> The value was taken from reference (Torrent-Sucarrat, M., Francisco, J. S., and Anglada, J. M.: Sulfuric acid as autocatalyst in the formation of sulfuric acid, J. Am. Chem. Soc., 134, 20632-20644, 2012.)

**Table S4** The high-pressure limiting rate constant ( $\text{cm}^3 \cdot \text{molecule}^{-1} \cdot \text{s}^{-1}$ ) for the hydrolysis reaction of  $\text{HNSO}_2$  with  $\text{H}_2\text{O}$  and **MSA** within the temperature range of 212.6-320.0 K

| $T(\text{K})$ | $\text{HNSO}_2 + \text{H}_2\text{O}$<br>$\rightarrow \text{HNSO}_2 \cdots \text{H}_2\text{O}$ | $\text{HNSO}_2 +$<br>$\text{H}_2\text{O} \cdots \text{H}_2\text{O}$<br>$\rightarrow \text{HNSO}_2 \cdots$<br>$\text{H}_2\text{O} \cdots \text{H}_2\text{O}$ | $\text{HNSO}_2 +$<br><b>MSA</b> $\cdots \text{H}_2\text{O}$<br>$\rightarrow \text{HNSO}_2 \cdots$<br><b>MSA</b> $\cdots \text{H}_2\text{O}$ |
|---------------|-----------------------------------------------------------------------------------------------|-------------------------------------------------------------------------------------------------------------------------------------------------------------|---------------------------------------------------------------------------------------------------------------------------------------------|
| 212.6         | $2.06 \times 10^{-10}$                                                                        | $1.96 \times 10^{-10}$                                                                                                                                      | $4.04 \times 10^{-11}$                                                                                                                      |
| 229.7         | $2.14 \times 10^{-10}$                                                                        | $2.03 \times 10^{-10}$                                                                                                                                      | $4.20 \times 10^{-11}$                                                                                                                      |
| 259.3         | $2.27 \times 10^{-10}$                                                                        | $2.16 \times 10^{-10}$                                                                                                                                      | $4.46 \times 10^{-11}$                                                                                                                      |
| 280.0         | $2.36 \times 10^{-10}$                                                                        | $2.24 \times 10^{-10}$                                                                                                                                      | $4.63 \times 10^{-11}$                                                                                                                      |
| 290.0         | $2.41 \times 10^{-10}$                                                                        | $2.28 \times 10^{-10}$                                                                                                                                      | $4.71 \times 10^{-11}$                                                                                                                      |
| 298.15        | $2.44 \times 10^{-10}$                                                                        | $2.31 \times 10^{-10}$                                                                                                                                      | $4.78 \times 10^{-11}$                                                                                                                      |
| 300.0         | $2.45 \times 10^{-10}$                                                                        | $2.32 \times 10^{-10}$                                                                                                                                      | $4.79 \times 10^{-11}$                                                                                                                      |
| 310.0         | $2.49 \times 10^{-10}$                                                                        | $2.36 \times 10^{-10}$                                                                                                                                      | $4.87 \times 10^{-11}$                                                                                                                      |
| 320.0         | $2.53 \times 10^{-10}$                                                                        | $2.40 \times 10^{-10}$                                                                                                                                      | $4.95 \times 10^{-11}$                                                                                                                      |

## Part S1. Calculations of reaction rate coefficients

The rate coefficients for the hydrolysis of  $\text{HNSO}_2$  with **MSA** were calculated through a two-step process. Initially, the high-pressure-limit (HPL) rate coefficients were computed applying VRC-VTST methods within the Polyrates package<sup>1</sup>. Subsequently, on the basis of the HPL rate coefficients, the rate coefficients for the hydrolysis of  $\text{HNSO}_2$  with **MSA** were calculated within the temperature range of 212.6-320.0 K and pressures applying the Master Equation Solver for Multi-Energy Well Reactions (MESMER) program<sup>2</sup>. The rate coefficients for the barrierless steps transitioning between reactants and pre-reactive complexes were assessed applying the Inverse Laplace Transform (ILT) method within MESMER calculations<sup>3</sup>, while the step transitioning between pre-reactive complexes and post-reactive complexes via transition states were evaluated using the RRKM theory<sup>4</sup> in combination with the asymmetric Eckart model.

The ILT methods and RRKM theory can be respectively expressed in Eq. (S1)-Eq. (S2).

$$k(E) = \frac{W(E-E_0)}{h\rho(E)} \quad (\text{S1})$$

$$k^\infty(\beta) = \frac{1}{Q(\beta)} \int_0^\infty k(E)\rho(E)\exp(-\beta E)dE \quad (\text{S2})$$

In Eq (S1) and Eq (S2), the equation  $W(E-E_0)$  represents the rovibrational sum of states (SOS) at the optimized transition state (TS) geometry, where  $E_0$  signifies the reaction threshold energy;  $h$  represents Planck's constant,  $\rho(E)$  denotes the density of rovibrational states of the reactant and  $Q(\beta)$  is the corresponding canonical partition function. Additionally, electronic geometries, vibrational frequencies, and rotational constants were computed at the M06-2X/6-311++G(2df,2pd) level, while single-point energy calculations were refined at the CCSD(T)-F12/cc-pVDZ-F12 level.

Herein, we describe the implementation details of the VRC-TST calculation<sup>5-8</sup>. There are two assumptions in VRC-VTST calculation: (1) the contribution of the vibrational modes of reactants to the partition function is canceled by the corresponding contribution of transition states to the partition function; (2) the internal geometries of reactants are fixed along the reaction coordinate. The reaction coordinate in VRC-VTST is different from that in RP-VTST and determined by the pivot points of each reactant fragment. For the  $\text{HNSO}_2$  hydrolysis reaction, the pivot points of  $\text{HNSO}_2$  (points 1 and 2) are located at a distance  $\pm d$  along its S axis, and the pivots of  $\text{H}_2\text{O}$  (points 3 and 4) are located at a distance  $\pm d$  perpendicular to  $\text{H}_2\text{O}$  molecule lane. As shown in Fig. S6, the Multiwfn package combined with the VMD software is adopted to visualize the reaction system and

help determine the location of pivot points. The reaction coordinate value ( $s$ ) is defined as the minimum of the distance ( $r_{ij}$ ) between the pivot point  $i$  ( $=1$  or  $2$ ) and pivot point  $j$  ( $=3$  or  $4$ ), where  $i$  and  $j$  represent the pivot points of  $\text{HNSO}_2$  and  $\text{H}_2\text{O}$  molecules, respectively. Hence, each of the four dividing surfaces is obtained by symmetrically placing two pivot points of each radical fragment (1-3, 1-4, 2-3, and 2-4). For example, if the reaction coordinate  $s$  is equal to  $r_{23}$ , one of the four dividing surfaces (2-3), is determined by the locations of pivot points 2, 3 and the reaction coordinate  $s$ . There are total four pair of pivot points, the other three dividing surfaces (1-3, 1-4, 2-4) are defined by their corresponding pivot points and reaction coordinates  $s$ . Note that the locations of pivot points are critical to the rate constant calculation. Considering the difference between  $\text{HNSO}_2$  and  $\text{H}_2\text{O}$  molecules, the distance  $s$  between pivot points is varied from 2.5 to 6 Å for  $\text{HNSO}_2$  and  $\text{H}_2\text{O}$  in each case with a 0.5 Å grid increment.

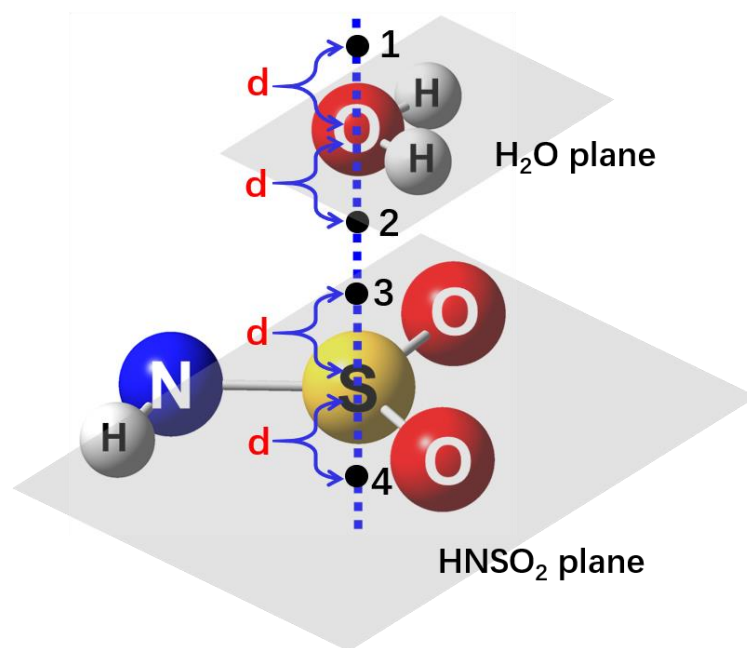

**Fig. S6** The placements of the pivot points for the  $\text{HNSO}_2$  hydrolysis

1. Chuang, Y., Corchado, J., Fast, P., Villa, J., Coitino, E., Hu, W., Liu, Y., Lynch, G., Nguyen, K., and Jackels, C.: Polyrate-version 8.2, University of Minnesota, Minneapolis, 1999.
2. Glowacki, D. R., Liang, C.-H., Morley, C., Pilling, M. J., and Robertson, S. H.: MESMER: an open-source master equation solver for multi-energy well reactions, *J. Phys. Chem. A*, 116, 9545-9560, 2012.
3. Horváth, G., Horváth, I., Almousa, S. A. D., and Telek, M.: Numerical inverse Laplace transformation using concentrated matrix exponential distributions, *Perform. Evaluation.*, 137, 102067, 2020.
4. Mai, T. V. T., Duong, M. V., Nguyen, H. T., and Huynh, L. K.: Ab initio kinetics of the  $\text{HOSO}_2 + {}^3\text{O}_2 \rightarrow \text{SO}_3 + \text{HO}_2$  reaction, *Phys. Chem. Chem. Phys.*, 20, 6677-6687, 2018.



- 189 5. Bao, J. L., Zhang, X., and Truhlar, D. G.: Barrierless association of  $\text{CF}_2$  and dissociation of  $\text{C}_2\text{F}_4$  by ariational  
190 transition-state theory and system-specific quantum Rice-Ramsperger-Kassel theory, *Proc. Natl. Acad. Sci.*  
191 U.S.A., 113, 13606-13611, 2016.
- 192 6. Long, B., Wang, Y., Xia, Y., He, X., Bao, J. L., and Truhlar, D. G.: Atmospheric Kinetics: Bimolecular Reactions  
193 of Carbonyl Oxide by a Triple-Level Strategy, *J. Am. Chem. Soc.*, 143, 8402-8413, 2021.
- 194 7. Georgievskii, Y. and Klippenstein, S.: Variable reaction coordinate transition state theory: Analytic results and  
195 application to the  $\text{C}_2\text{H}_3 + \text{H} \rightarrow \text{C}_2\text{H}_4$  reaction, *JCP*, 118, 5442-5455, 2003.
- 196 8. Meana-Pañeda, R., Zheng, J., Bao, J. L., Zhang, S., Lynch, B. J., Corchado, J. C., Chuang, Y.-Y., Fast, P. L., Hu,  
197 W.-P., and Liu, Y.-P.: Polyrates 2023: A computer program for the calculation of chemical reaction rates for  
198 polyatomics. New version announcement, *Comput Phys Commun*, 294, 108933, 2024.

**Table S5** Rate coefficients ( $k$ ,  $\text{cm}^3 \cdot \text{molecule}^{-1} \cdot \text{s}^{-1}$ ) for the hydrolysis of  $\text{HNSO}_2$  by master equation within the temperature range of 212.6-320.0 K

| $T/\text{K}$ | $k_{\text{R}}$         |
|--------------|------------------------|
| 212.6        | $2.55 \times 10^{-28}$ |
| 229.7        | $3.78 \times 10^{-28}$ |
| 259.3        | $1.04 \times 10^{-27}$ |
| 280.0        | $2.70 \times 10^{-27}$ |
| 290.0        | $4.53 \times 10^{-27}$ |
| 298.0        | $7.02 \times 10^{-27}$ |
| 300.0        | $7.86 \times 10^{-27}$ |
| 310.0        | $1.39 \times 10^{-26}$ |
| 320.0        | $2.50 \times 10^{-26}$ |

$k_{\text{R}}$  is the bimolecular rate constant for the hydrolysis of  $\text{HNSO}_2$ .

**Table S6** Concentrations (molecules·cm<sup>-3</sup>) of H<sub>2</sub>O and MSA within the temperature range of 213-320 K and altitude range of 0-15 km

| Altitude                                              |                     | 0 km                  |                       |                       |                       |                       |                       | 5 km                  | 10 km                 | 15 km              |
|-------------------------------------------------------|---------------------|-----------------------|-----------------------|-----------------------|-----------------------|-----------------------|-----------------------|-----------------------|-----------------------|--------------------|
| T/K                                                   | RH                  | 280.0                 | 290.0                 | 298.0                 | 300.0                 | 310.0                 | 320.0                 | 259.3                 | 229.7                 | 212.6              |
| [H <sub>2</sub> O]                                    | 20%RH <sup>a</sup>  | $5.16 \times 10^{16}$ | $9.60 \times 10^{16}$ | $1.50 \times 10^{17}$ | $1.72 \times 10^{17}$ | $2.92 \times 10^{17}$ | $4.70 \times 10^{17}$ |                       |                       |                    |
|                                                       | 40%RH <sup>a</sup>  | $1.03 \times 10^{17}$ | $1.91 \times 10^{17}$ | $3.10 \times 10^{17}$ | $3.43 \times 10^{17}$ | $5.84 \times 10^{17}$ | $9.40 \times 10^{17}$ |                       |                       |                    |
|                                                       | 60%RH <sup>a</sup>  | $1.55 \times 10^{17}$ | $2.87 \times 10^{17}$ | $4.50 \times 10^{17}$ | $5.15 \times 10^{17}$ | $8.77 \times 10^{17}$ | $1.41 \times 10^{18}$ | $2.70 \times 10^{12}$ | $2.30 \times 10^{11}$ | $6.30 \times 10^6$ |
|                                                       | 80%RH <sup>a</sup>  | $2.07 \times 10^{17}$ | $3.82 \times 10^{17}$ | $6.20 \times 10^{17}$ | $6.86 \times 10^{17}$ | $1.17 \times 10^{18}$ | $1.88 \times 10^{18}$ |                       |                       |                    |
|                                                       | 100%RH <sup>a</sup> | $2.58 \times 10^{17}$ | $4.78 \times 10^{17}$ | $7.70 \times 10^{17}$ | $8.58 \times 10^{17}$ | $1.46 \times 10^{18}$ | $2.35 \times 10^{18}$ |                       |                       |                    |
| [MSA] <sup>b</sup> = 10 <sup>4</sup> -10 <sup>9</sup> |                     |                       |                       |                       |                       |                       |                       |                       |                       |                    |

<sup>a</sup> The value was taken from reference (Anglada, J.M., Hoffman, G.J., Slipchenko, L.V., M. Costa, M., Ruiz-Lopez, M.F., and Francisco, J.S., Atmospheric significance of water clusters and ozone-water complexes. J. Phys. Chem. A 117, 10381-10396, 2013.)

<sup>b</sup> The value was taken from reference (Shen, J., Elm, J., Xie, H.-B., Chen, J., Niu, J., and Vehkamäki, H.: Structural effects of amines in enhancing methanesulfonic acid-driven new particle formation, Environ. Sci. Technol., 54, 13498-13508, 2020.)

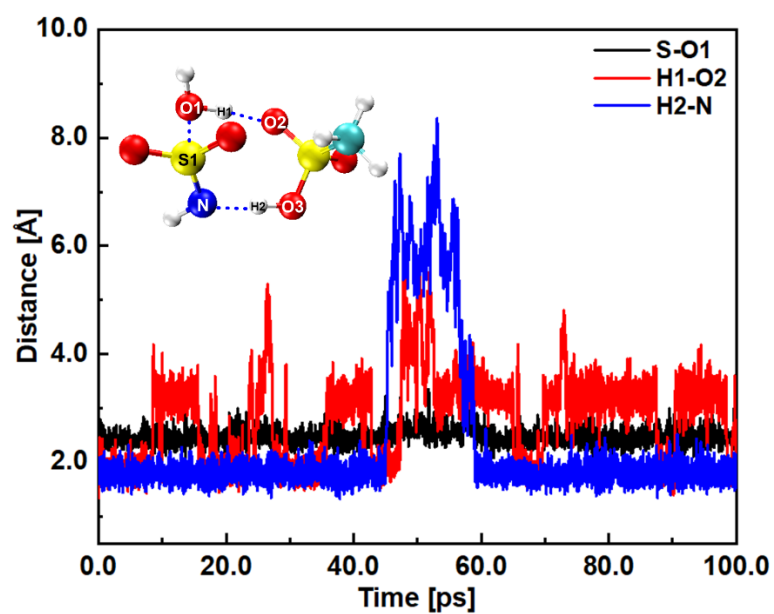

**Fig. S7** The dynamic trajectories of **MSA**-assisted gaseous hydrolysis of HNSO<sub>2</sub>

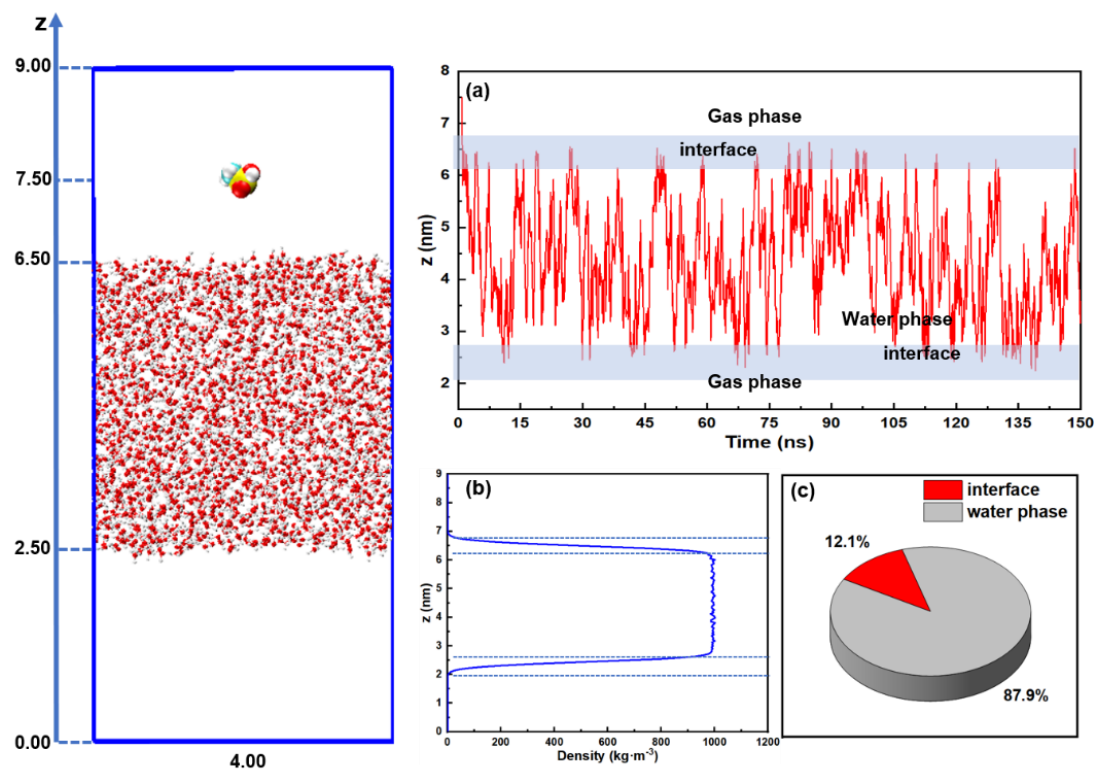

**Fig. S8** (a) The  $z$  coordinates of MSA molecule as the function of simulation time; (b) the density profile of water; (c) the pie chart with the occurrence percentages of MSA molecule at the air-water interface and in water phase

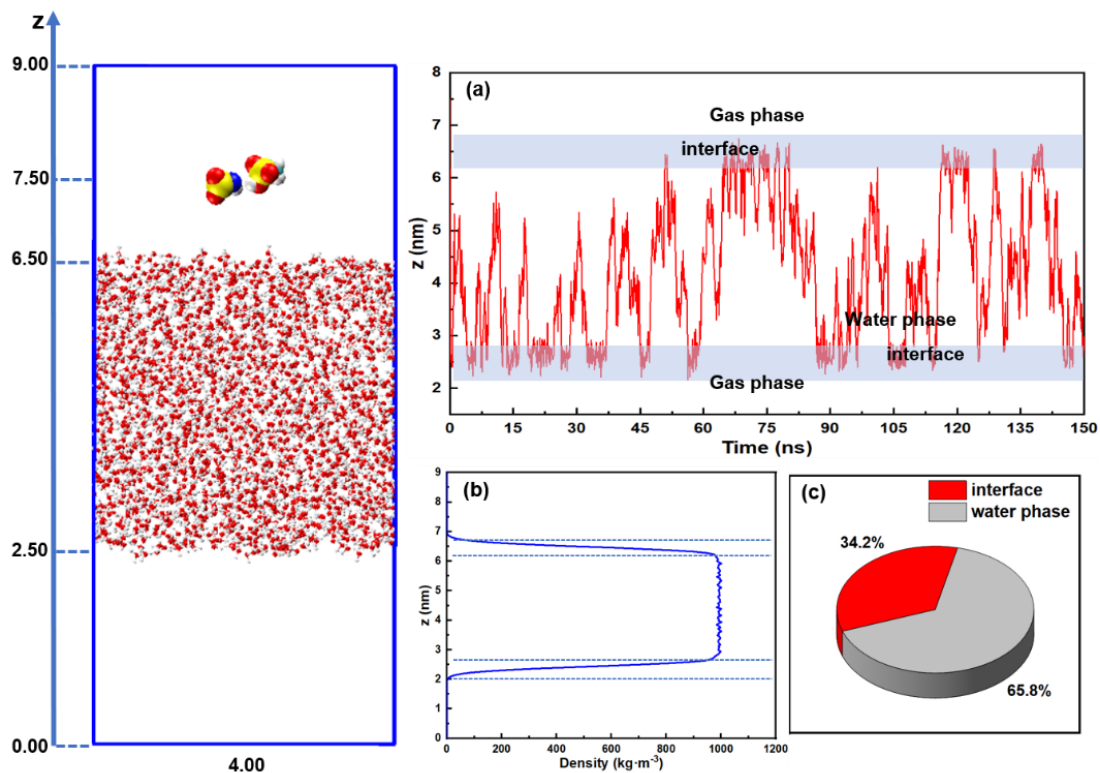

**Fig. S9** (a) The  $z$  coordinates of complex  $\text{HNSO}_2 \cdots \text{MSA}$  as the function of simulation time; (b) the density profile of water; (c) the pie chart with the occurrence percentages of complex  $\text{HNSO}_2 \cdots \text{MSA}$  at the air-water interface and in water phase



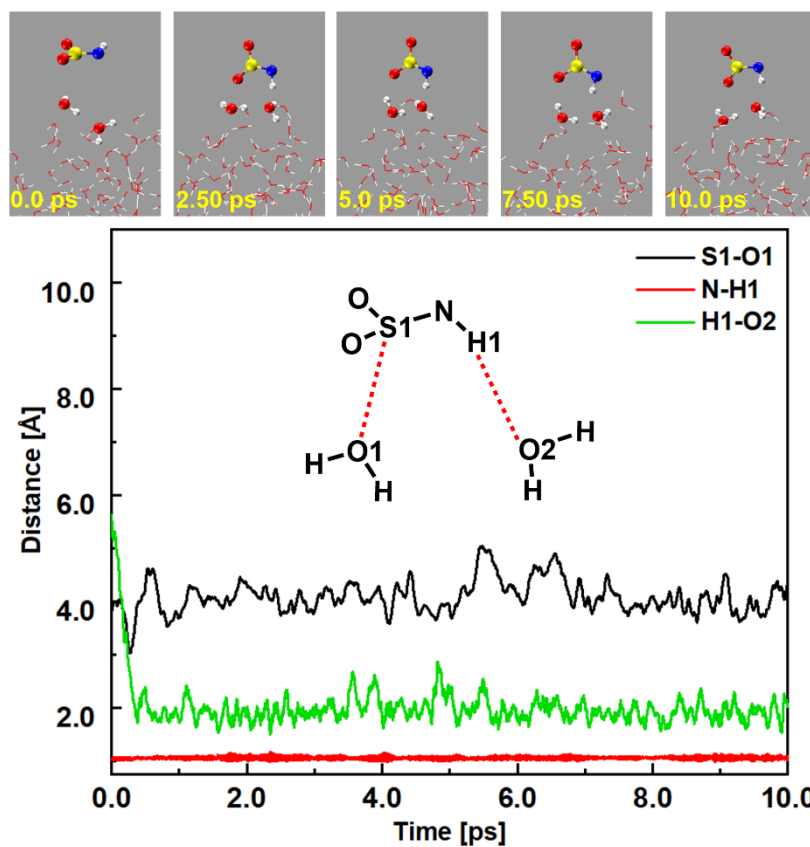

**Fig. S10** Snapshot structures taken from the BOMD simulations of HNSO<sub>2</sub> reaction at the air-water interface

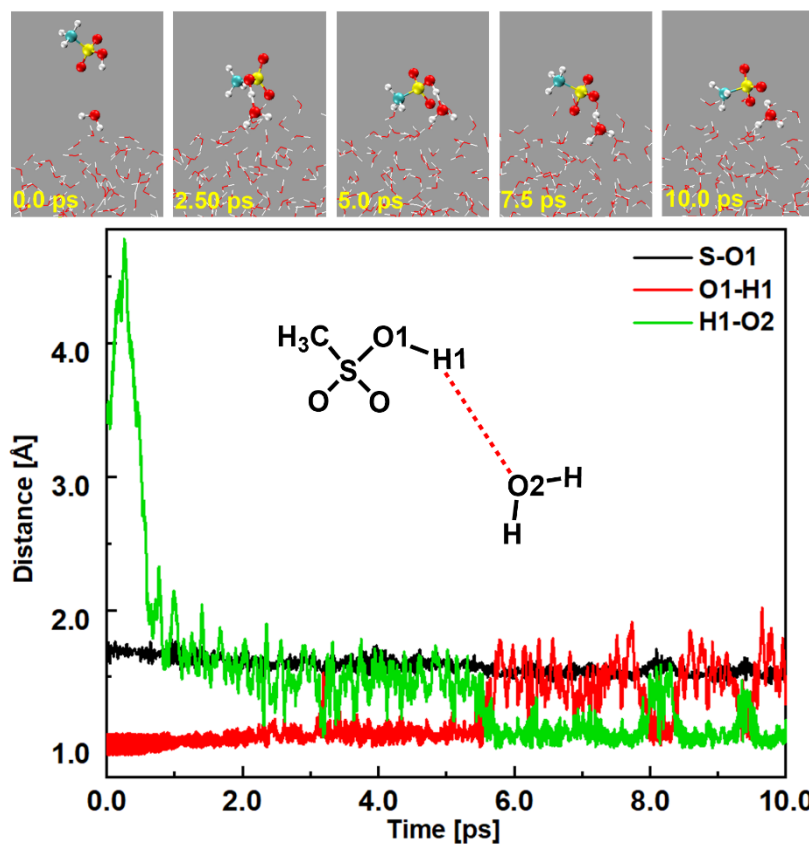

**Fig. S11** Snapshot structures taken from the BOMD simulations of **MSA** reaction at the air-water interface

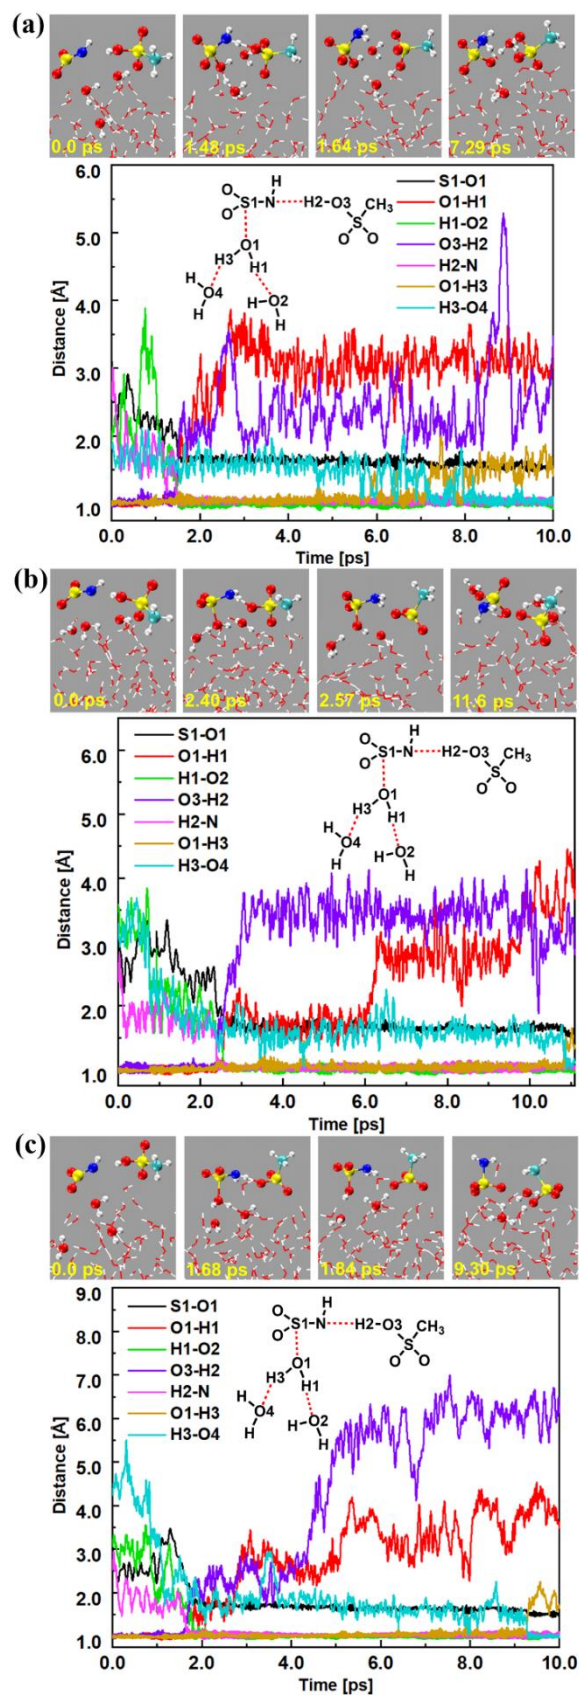

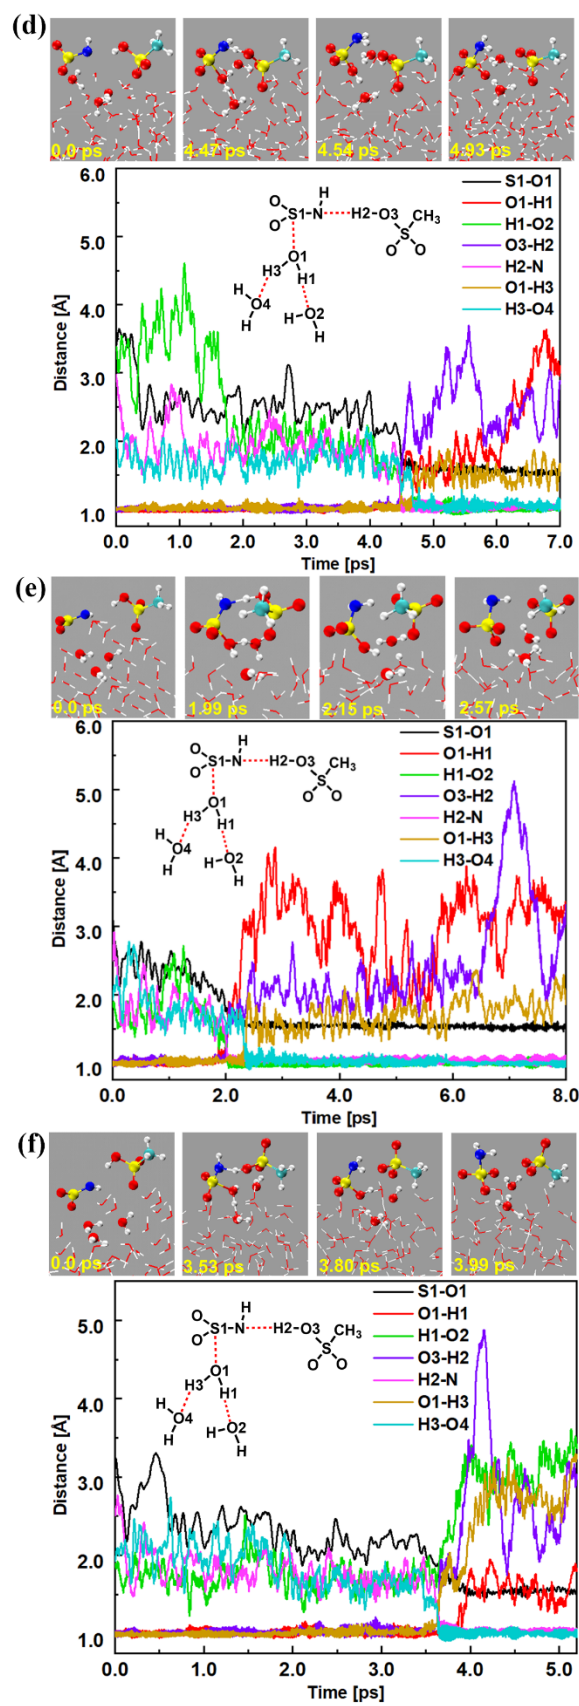

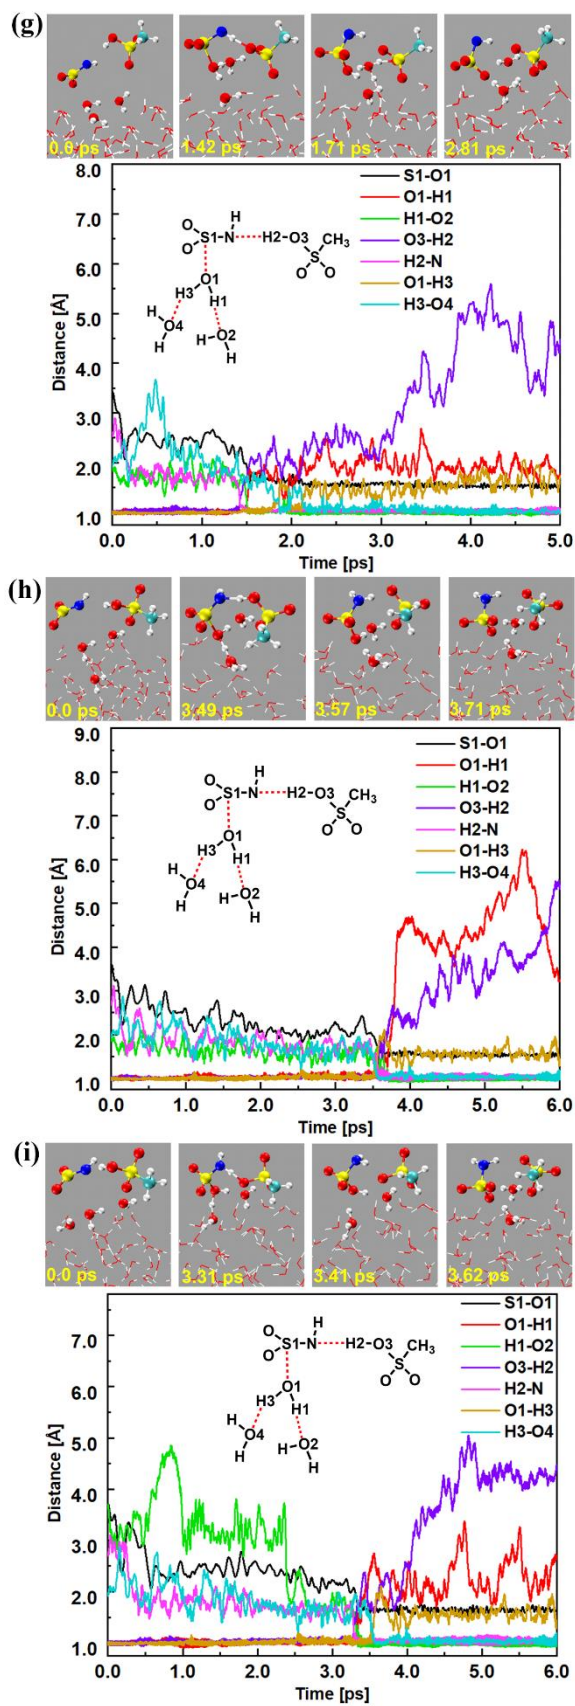

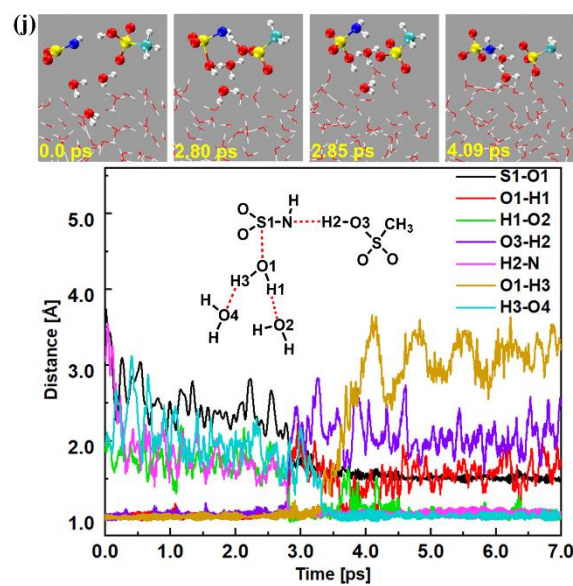

**Fig. S12** BOMD simulation trajectories and snapshots of  $\text{MSA}^-$  and  $\text{H}_3\text{O}^+$  ions forming mechanism via the chain structure routes in  $\text{MSA}$ -mediated hydration  $\text{HNSO}_2$  at the air-water interface



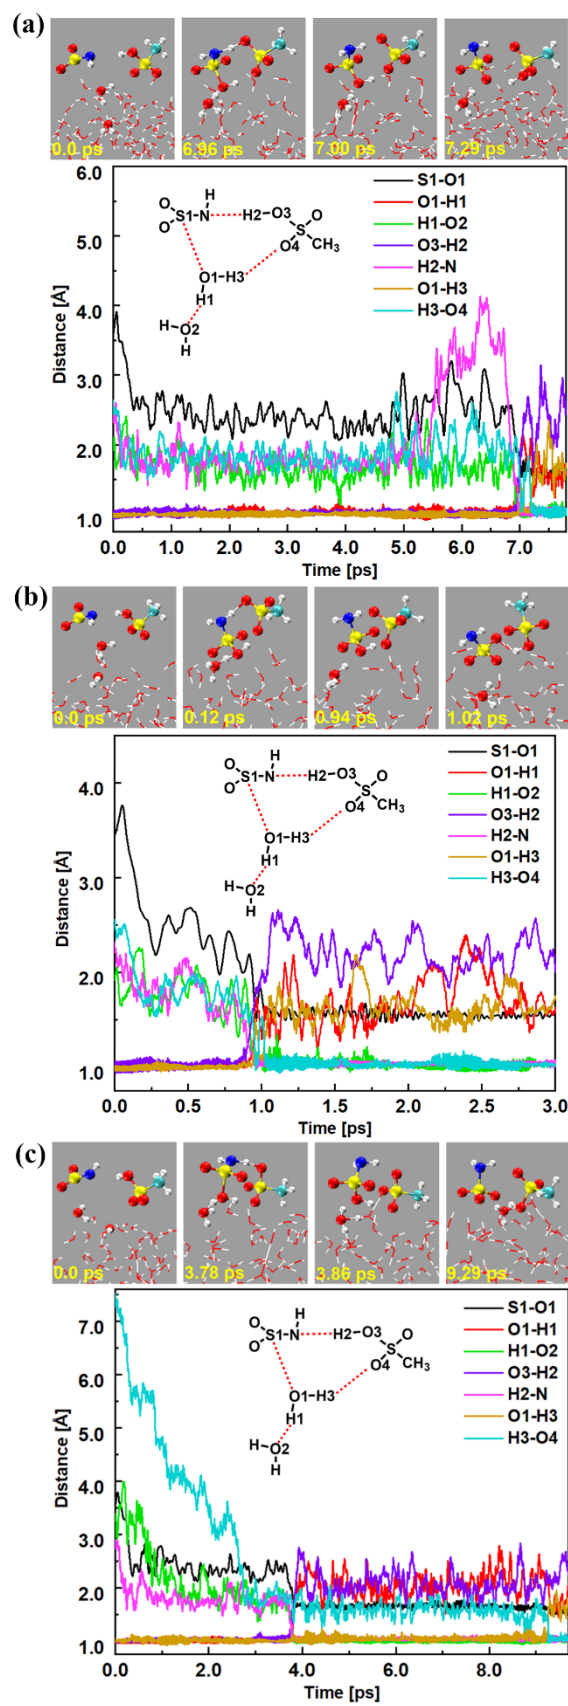

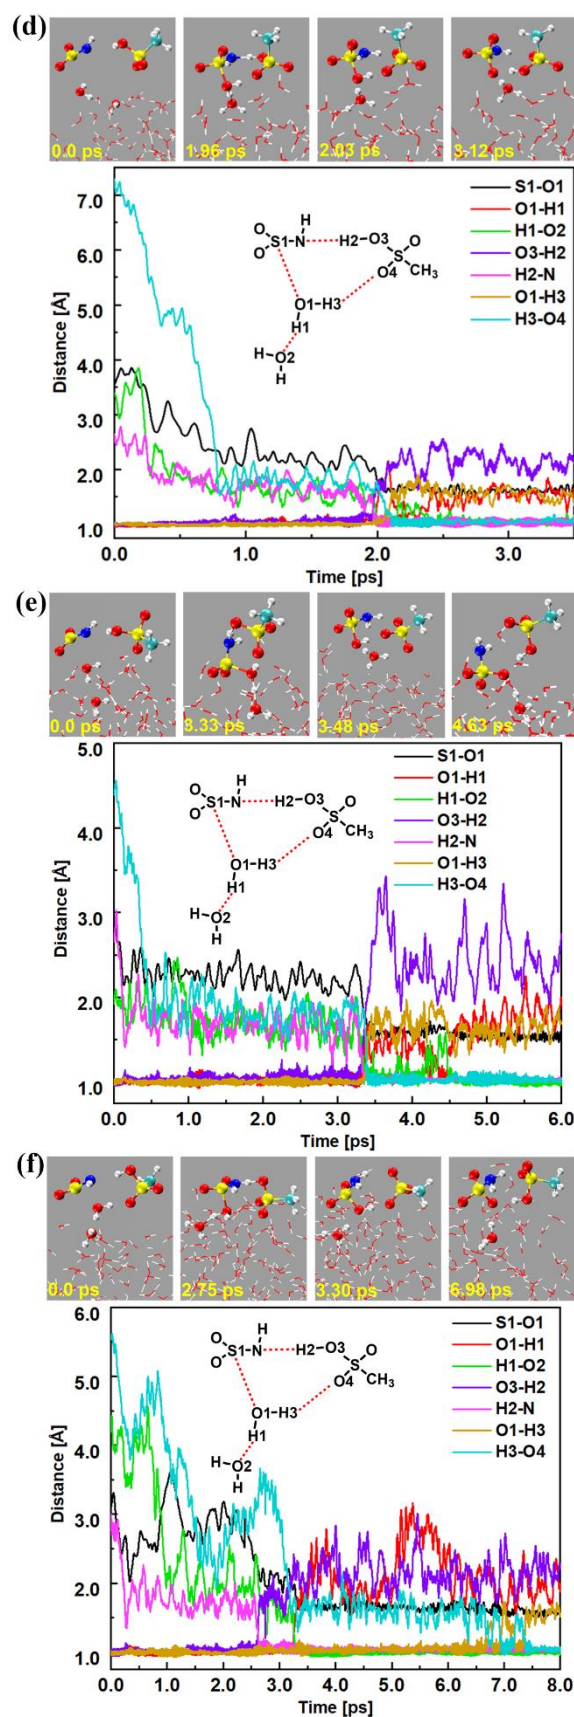

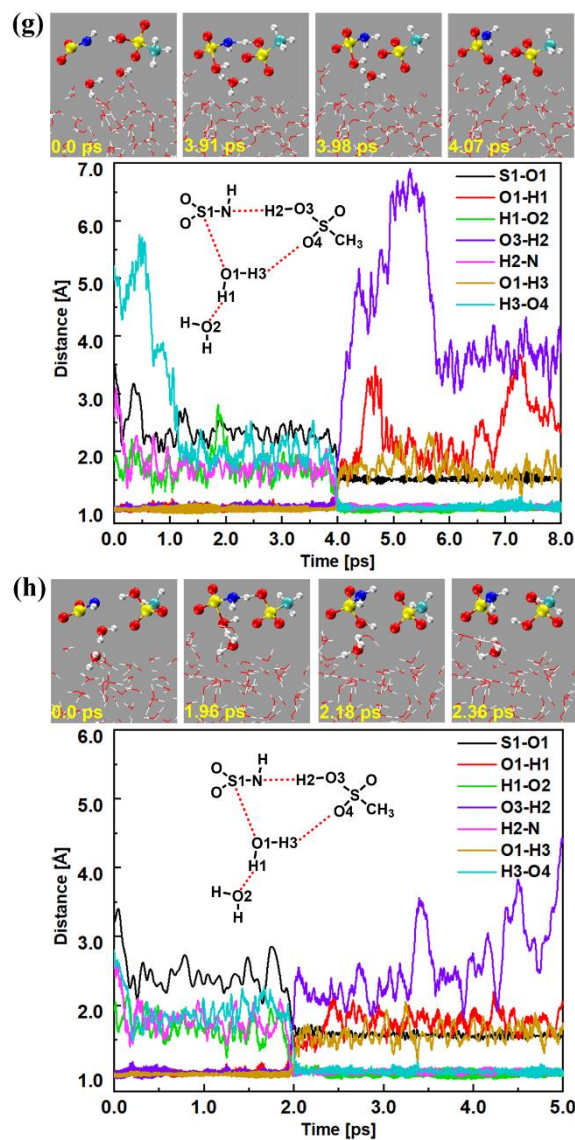

**Fig. S13** BOMD simulation trajectories and snapshots of  $\text{MSA}^-$  and  $\text{H}_3\text{O}^+$  ions forming mechanism via loop structure routes in  $\text{MSA}$ -mediated hydration  $\text{HNSO}_2$  at the air-water interface

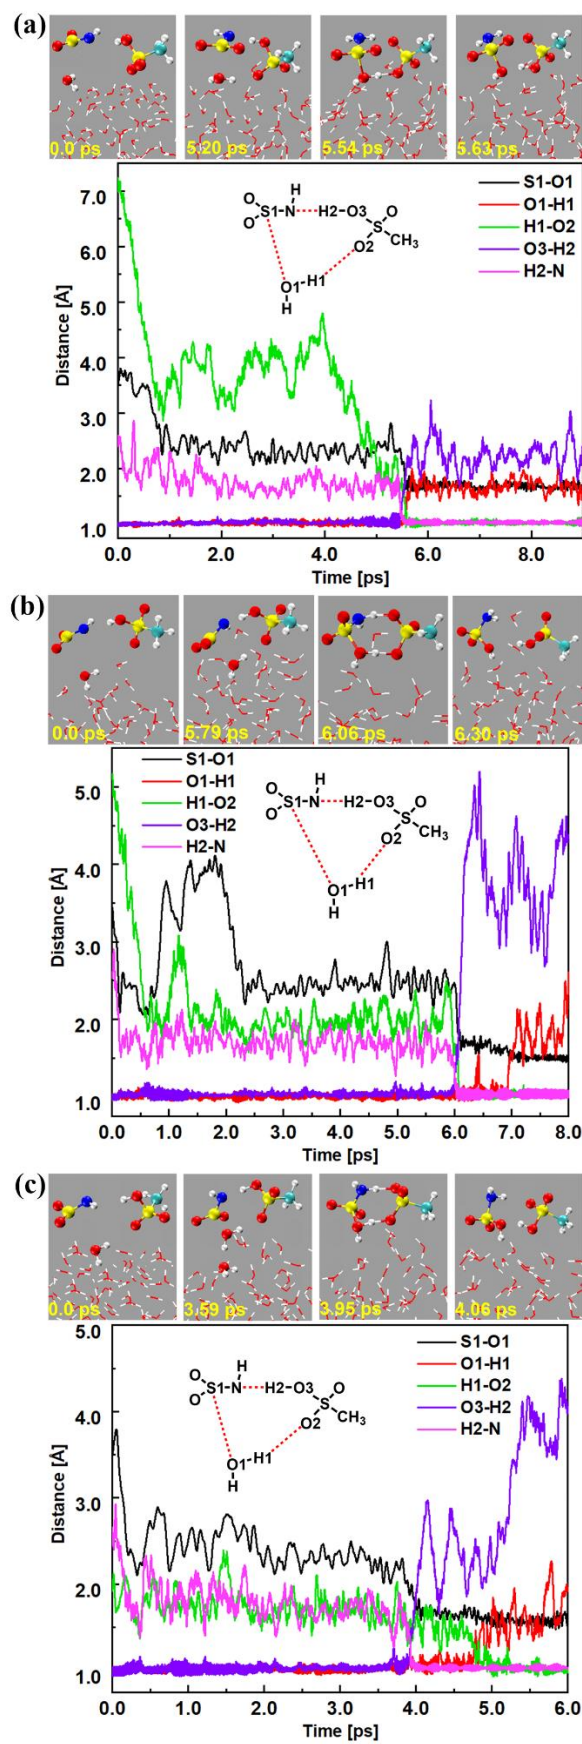

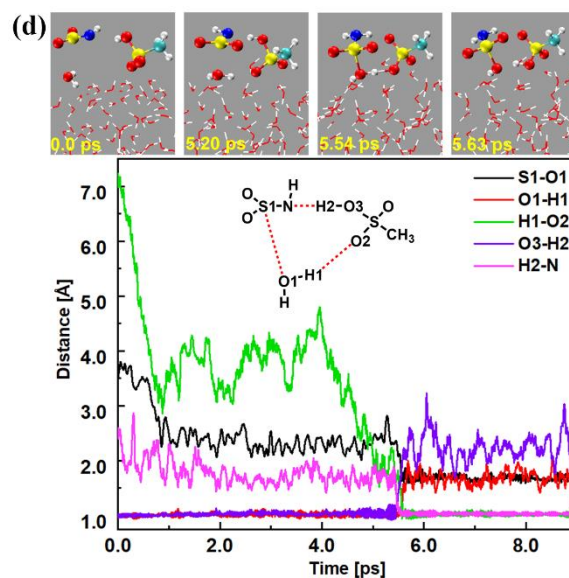

**Fig. S14** BOMD simulation trajectories and snapshots of proton exchange mechanism in **MSA** - mediated hydration HNSO<sub>2</sub> with a water molecule at the air-water interface



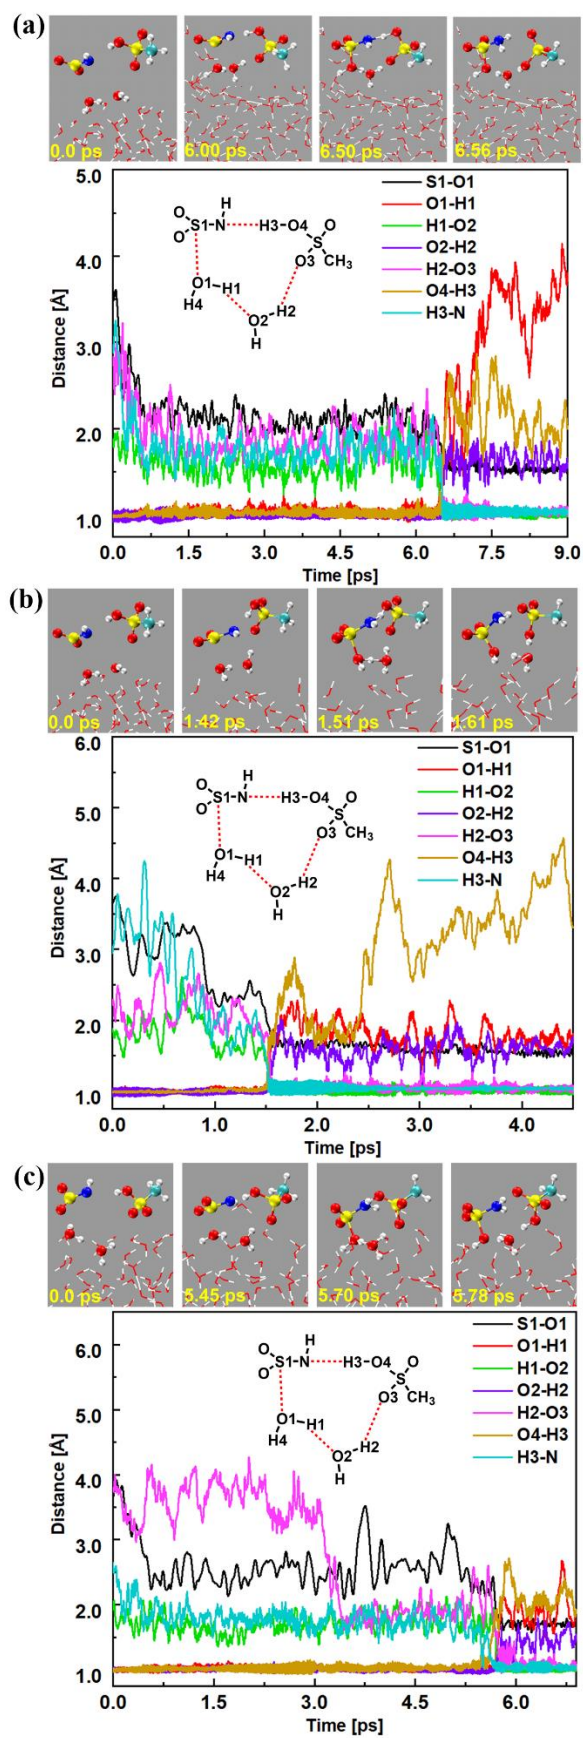

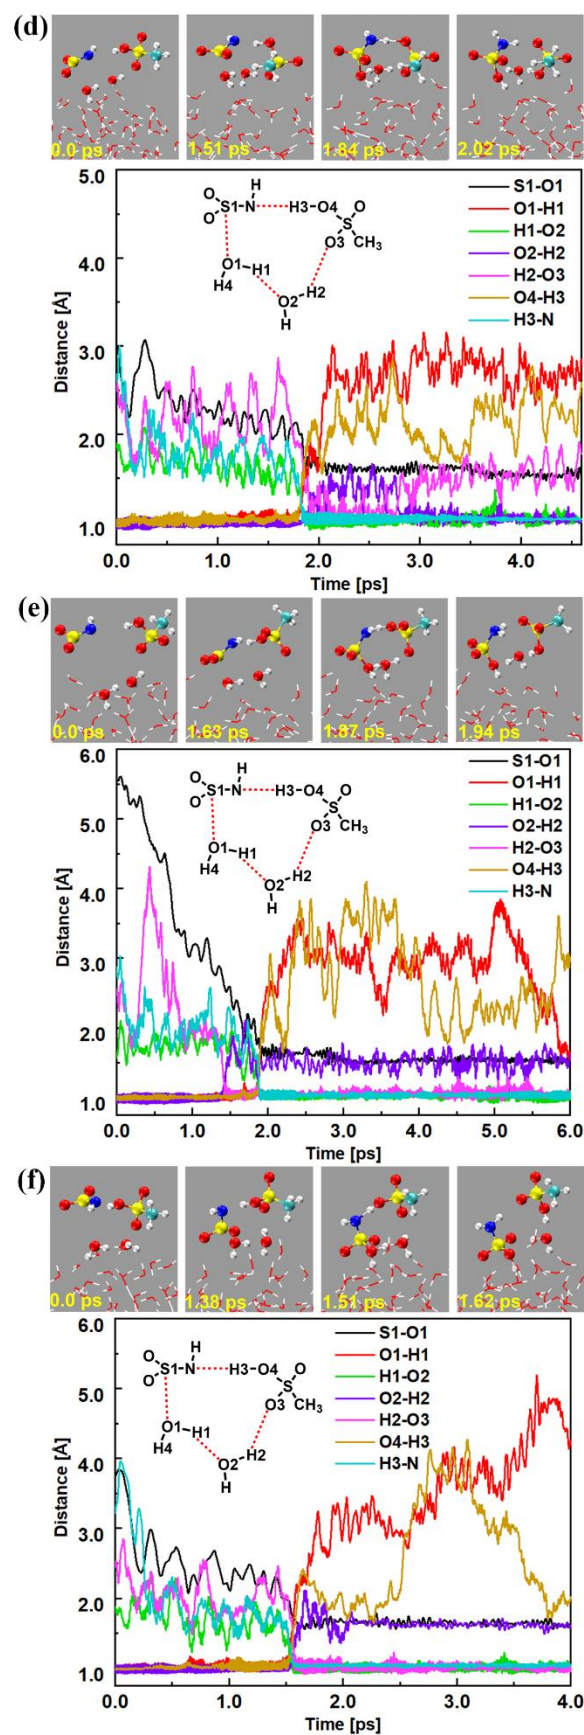

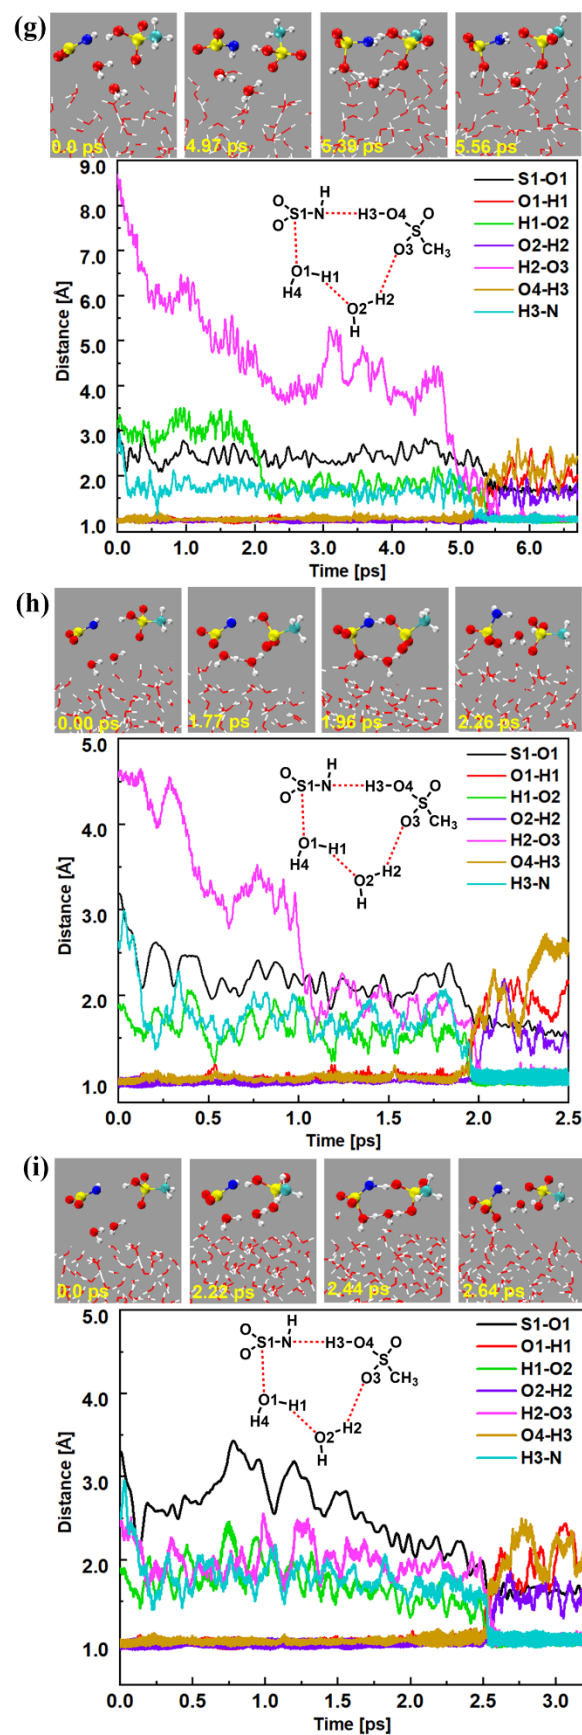



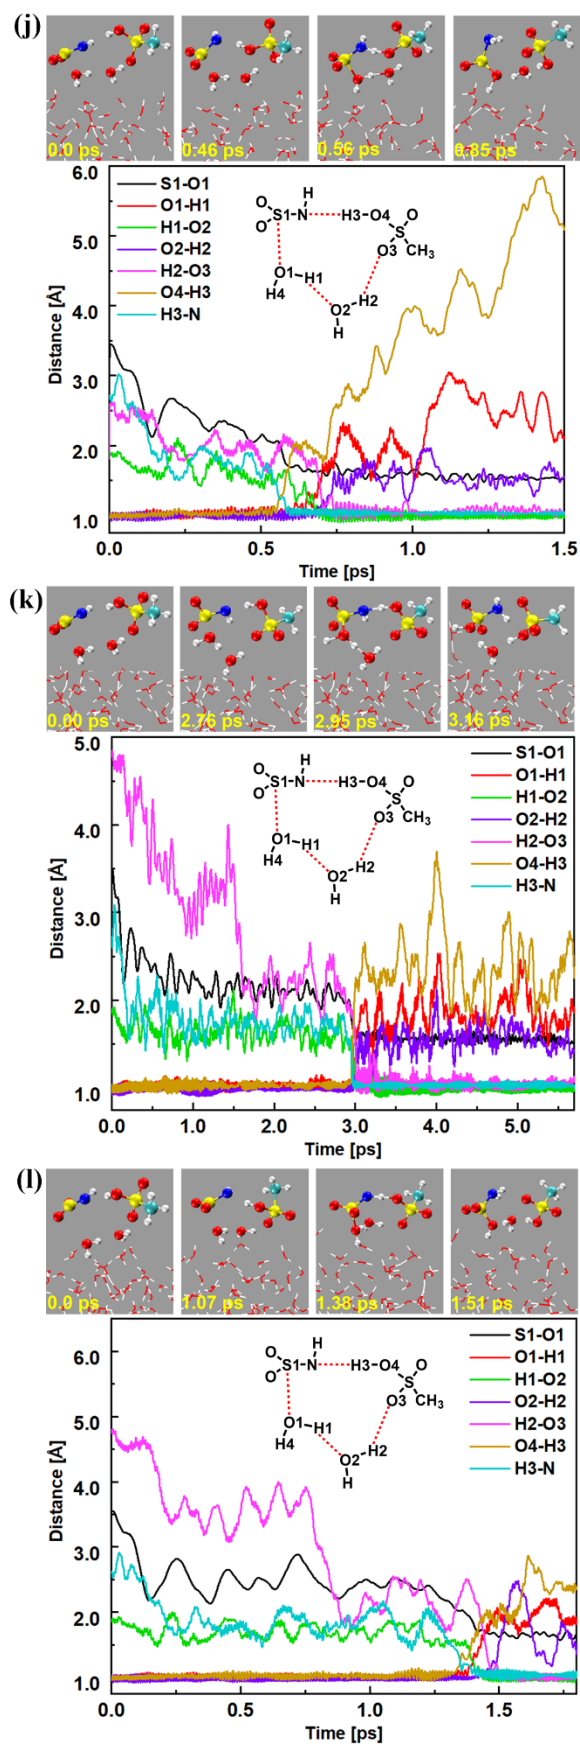

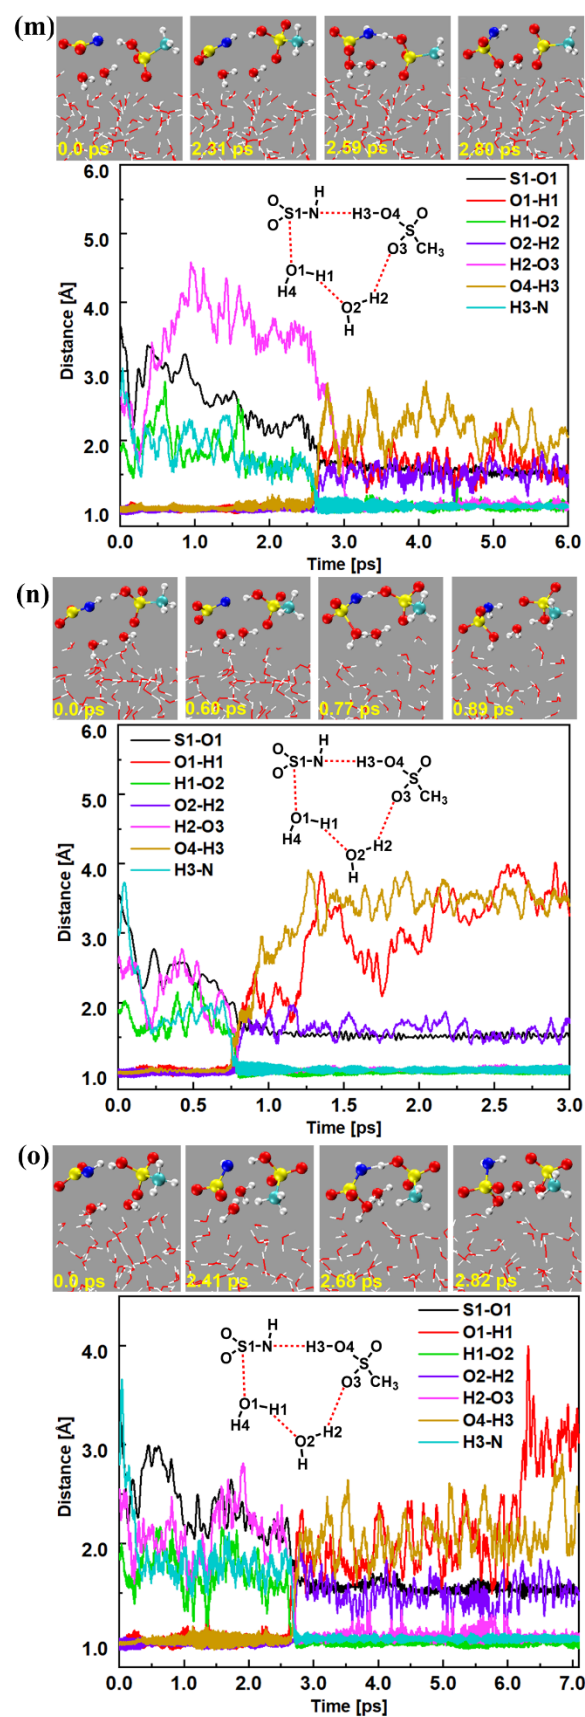

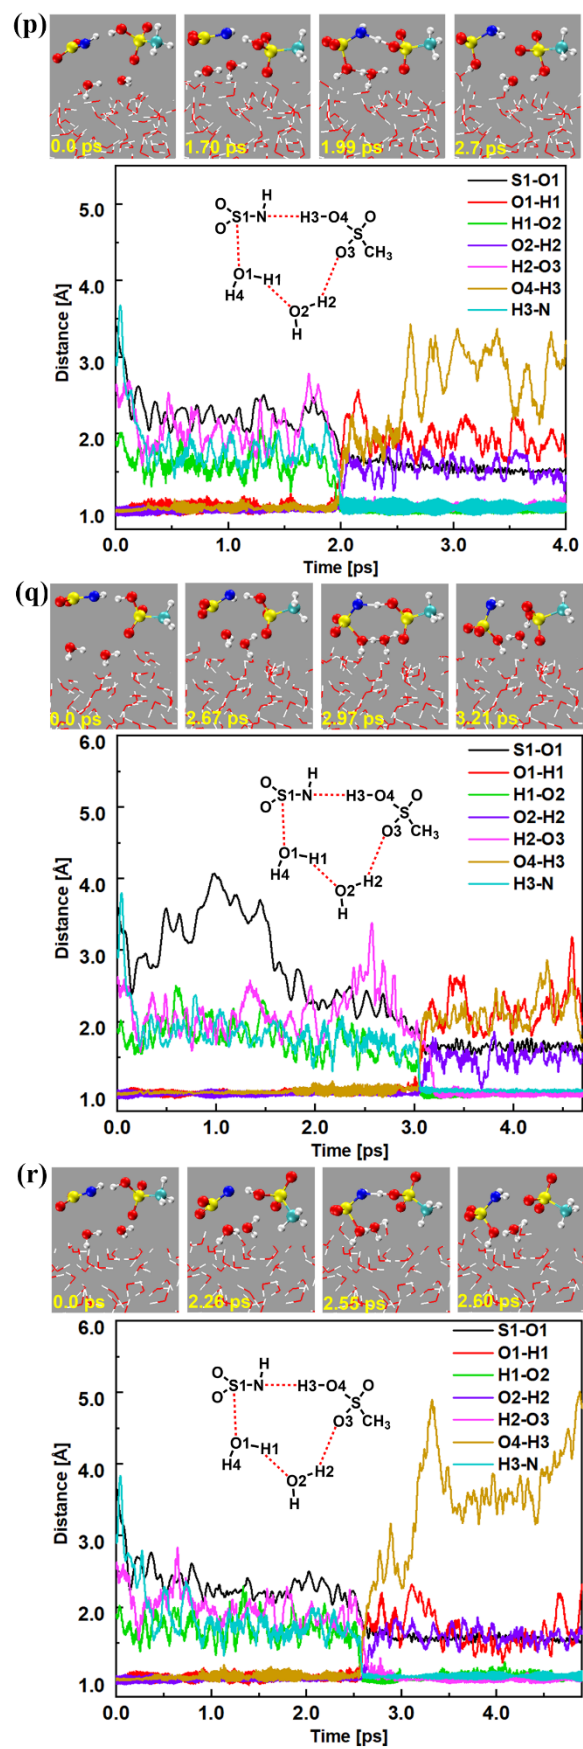

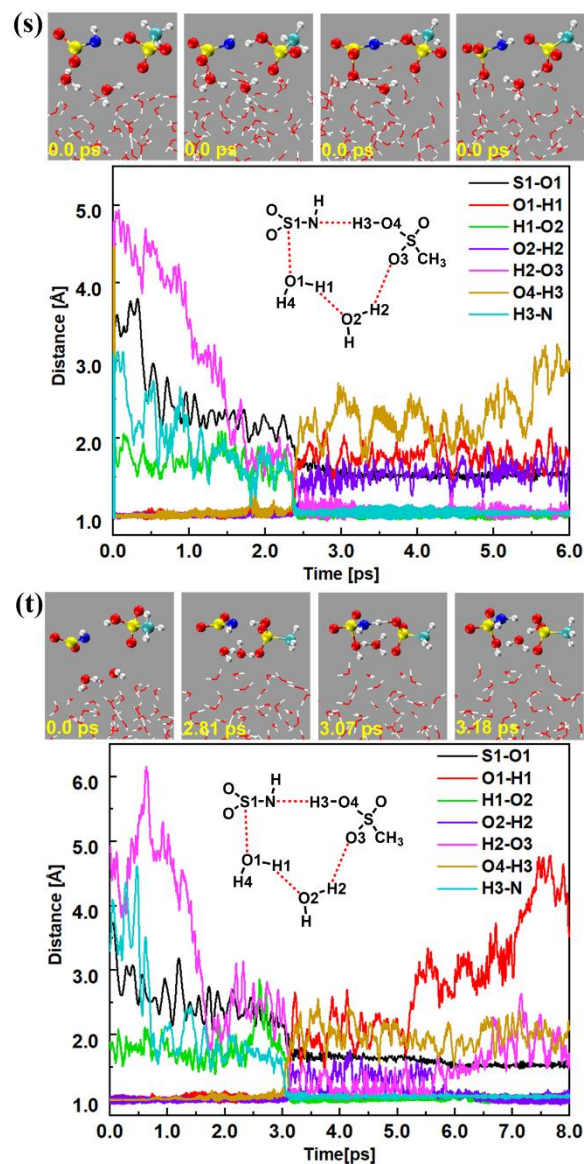

246

247 **Fig.S15** BOMD simulation trajectories and snapshots of proton exchange mechanism in **MSA** -  
 248 mediated hydration HNSO<sub>2</sub> with two water molecules at the air-water interface

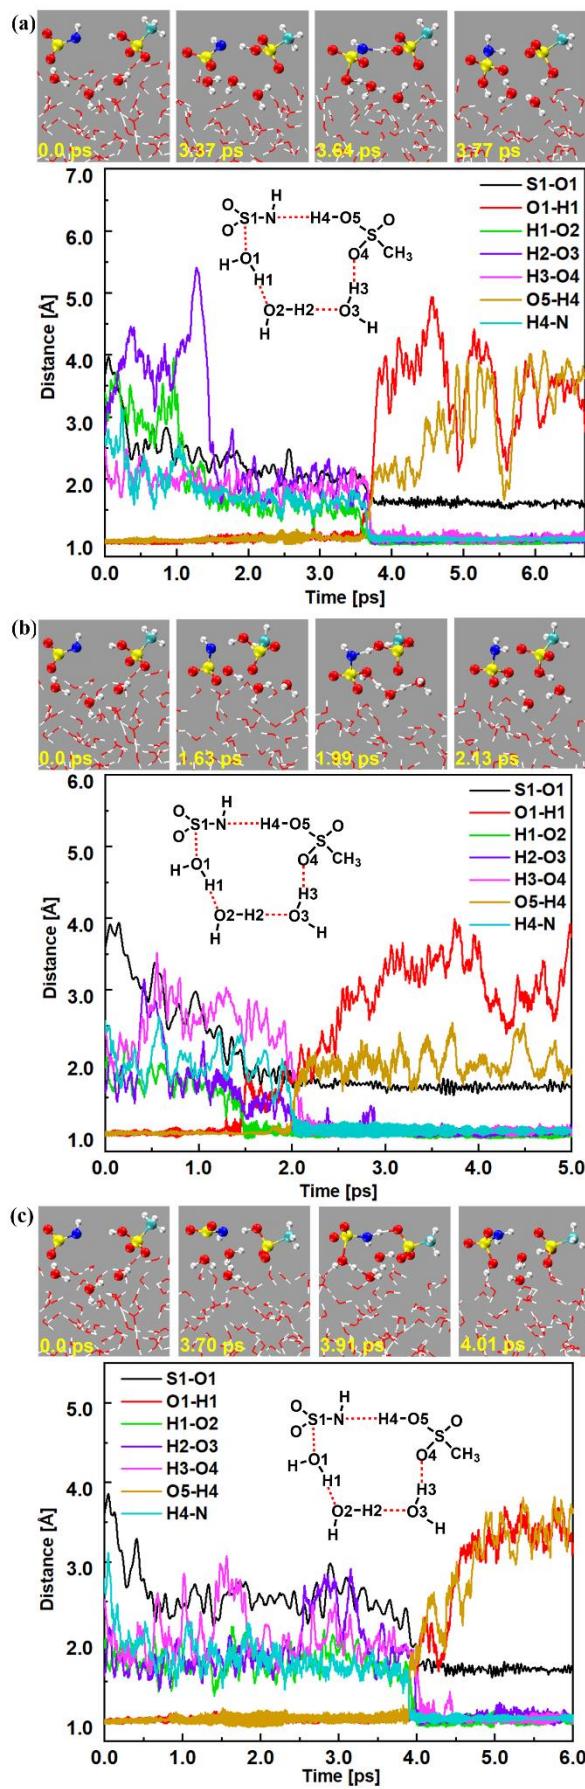

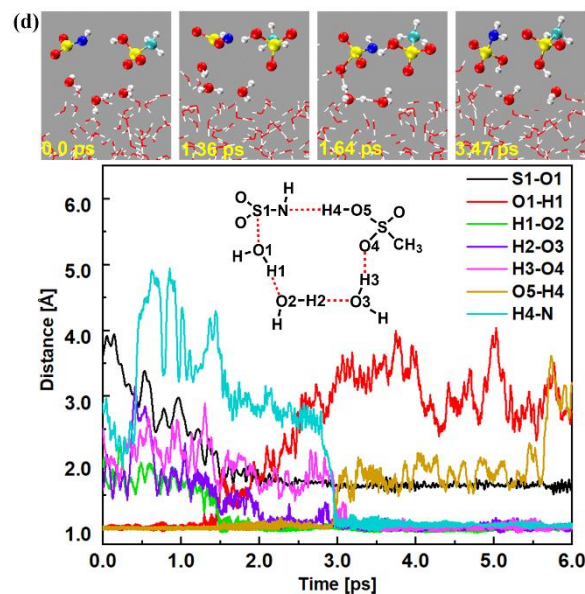

**Fig. S16** BOMD simulation trajectories and snapshots of proton exchange mechanism in MSA-mediated hydration HNSO<sub>2</sub> with three water molecules at the air-water interface



## Part S2. Configurational sampling

A multistep global minimum sampling scheme, which has previously been applied to study the atmospheric cluster formation, was employed to search for the global minima of the  $(\text{SFA})_x(\text{MSA})_y(\text{MA})_z$  ( $0 \leq z \leq x + y \leq 3$ ) clusters. To locate the global minimum energy structure, the artificial bee colony algorithm was systematically employed by the ABCcluster program<sup>1, 2</sup> to generate  $n \times 1000$  ( $1 < n \leq 4$ ) initial random configurations for each cluster, and then, PM6 semi-empirical method<sup>3-5</sup> was used to further pre-optimize the produced configurations above. Second, up to 100 structures with relatively lower energies were selected from the  $n \times 1000$  structures (where  $1 < n \leq 4$ ), and a M06-2X/6-31+G(*d,p*)<sup>6</sup> level of theory was applied for subsequent optimization. Finally, further geometry optimization and frequency calculations at the M06-2X/6-311++G(2*df*,2*pd*)<sup>7</sup> level of theory were performed to optimize the 10 best of 100 optimized configurations, and then the global minimum structure with the lowest energy was obtained. Subsequently, the M06-2X function combined with the 6-311++G(2*df*,2*pd*) basis set was chosen as it has been proven to be accurate in estimating the thermodynamic properties of atmospheric clusters, such as organic acid-SA-amine clusters, amide-SA clusters or amino acid-SA clusters. In this study, all the density functional theory (DFT) calculations were implemented in the Gaussian 09 program<sup>8</sup>.

1. Zhang, J. and Dolg, M.: AB Cluster: the artificial bee colony algorithm for cluster global optimization, *Phys. Chem. Chem. Phys.*, 17, 24173-24181, 2015.
2. Zhang, J. and Dolg, M.: Global optimization of clusters of rigid molecules using the artificial bee colony algorithm, *Phys. Chem. Chem. Phys.*, 18, 3003-3010, 2016.
3. Elm, J., Myllys, N., Hyttinen, N., Kurten, T.: Computational study of the clustering of a cyclohexene autoxidation product C<sub>6</sub>H<sub>8</sub>O<sub>7</sub> with itself and sulfuric acid. *J. Phys. Chem. A*, 119, 8414-8421, 2015.
4. Kromann, J.C., Christensen, A.S., Steinmann, C., Korth, M., Jensen, J.H.: A third-generation dispersion and third-generation hydrogen bonding corrected PM6 method: PM6-D3H+. *PeerJ*, 2, e449, 2014.
5. Partanen, L., Vehkamäki, H., Hansen, K., Elm, J., Henschel, H., Kurtén, T., Halonen, R., Zapadinsky, E.: Effect of conformers on free energies of atmospheric complexes. *J. Phys. Chem. A*, 120, 8613-8624, 2016.
6. Elm, J., Bilde, M., Mikkelsen, K.V.: Assessment of density functional theory in predicting structures and free energies of reaction of atmospheric prenucleation clusters. *J. Chem. Theory Comput.*, 8, 2071-2077, 2012.
7. Elm, J., Mikkelsen, K.V.: Computational approaches for efficiently modelling of small atmospheric clusters. *Chem. Phys. Lett.*, 615, 26-29, 2014.
8. Frisch, M.J., Trucks, G., Schlegel, H., Scuseria, G., Robb, M., Cheeseman, J., Scalmani, G., Barone, V., Mennucci, B., Petersson, G., Nakatsuji, H., Caricato, M., Li, X., Hratchian, H., Izmaylov, A., Bloino, J., Zheng, G., Sonnenberg, J., Hada, M., Fox, D., 2009 Gaussian 09 (Revision A02). Gaussian Inc. Wallingford CT.

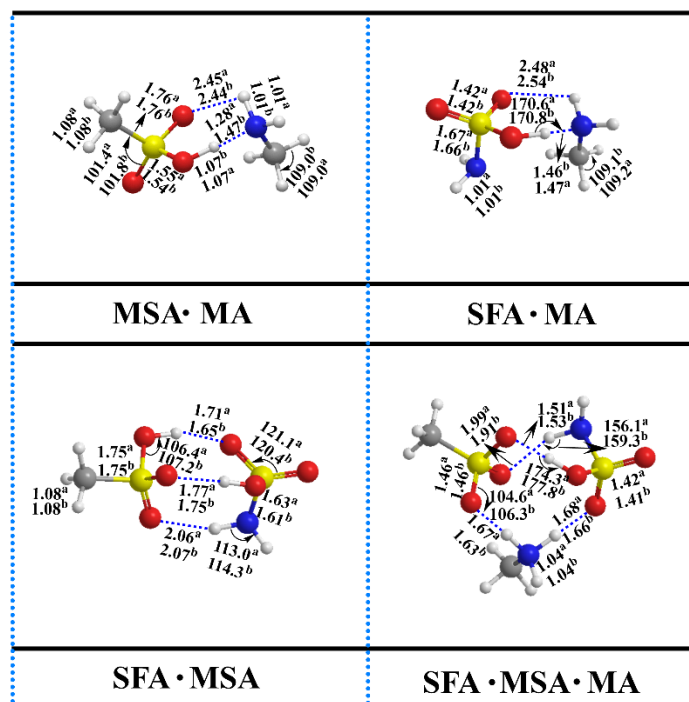

**Fig. S17** The optimized geometries of the important precursors of atmospheric aerosol nucleation (MSA, MA and SFA), especially the main bond lengths and bond angles at two different theoretical levels. SFA, MSA and MA are the shorthand for formic acid, sulfuric acid and ammonia, respectively. <sup>a</sup> The values obtained at the M06-2X/6-311++G(2df,2pd) level of theory. <sup>b</sup> The values obtained at the M06-2X/6-311++G(3df,3pd) level of theory. Bond length is in angstrom and angle is in degree.

For the MSA·A, SFA·A, MSA·SFA and MSA·SFA·MA clusters, the geometric parameters (Fig. S17) at the M06-2X/6-311++G(3df,3pd) and M06-2X/6-311++G(2df,2pd) levels of theory were calculated. The geometrical structure analysis indicated that the bond lengths and angles obtained from both theoretical levels are close to each other. So, all optimizations and vibrational frequency were calculated at M06-2X/6-311++G(2df,2pd) level.



296 **Table S7** Comparison of calculated formation free energies ( $\Delta G$ ) at the M06-2X/6-311++G(2*df*,2*pd*) and the M06-  
 297 2X/6-311++G(3*df*,3*pd*) levels

| Cluster    | M06-2X/6-311++G(2 <i>df</i> ,2 <i>pd</i> ) | M06-2X/6-311++G(3 <i>df</i> ,3 <i>pd</i> ) |
|------------|--------------------------------------------|--------------------------------------------|
|            | kcal·mol <sup>-1</sup>                     |                                            |
| MSA·MA     | -6.19                                      | -6.55                                      |
| MSA·SFA    | -9.33                                      | -9.54                                      |
| MA·SFA     | -6.01                                      | -6.98                                      |
| MSA·MA·SFA | -21.96                                     | -23.71                                     |

298 We calculated the Gibbs free energy (in Table S7) for the MSA·MA, SFA·MA, MSA·SFA and  
 299 MSA·SFA·MA clusters at the M06-2X/6-311++G(3*df*,3*pd*) and M06-2X/6-311++G(2*df*,2*pd*) levels of  
 300 theory. The analysis of Gibbs free energy indicated that the predicted relative  $\Delta G$  of MSA·MA,  
 301 SFA·MA, MSA·SFA and MSA·SFA·MA clusters at the M06-2X/6-311++G(2*df*,2*pd*) level is nearly  
 302 close to the values at the M06-2X/6-311++G(3*df*,3*pd*) level, with differences of less than 1.75  
 303 kcal·mol<sup>-1</sup>. So, we chose the M06-2X/6-311++G(2*df*,2*pd*) method for further frequency calculations.  
 304 Relevant details are presented in Table S7.

305  
 306

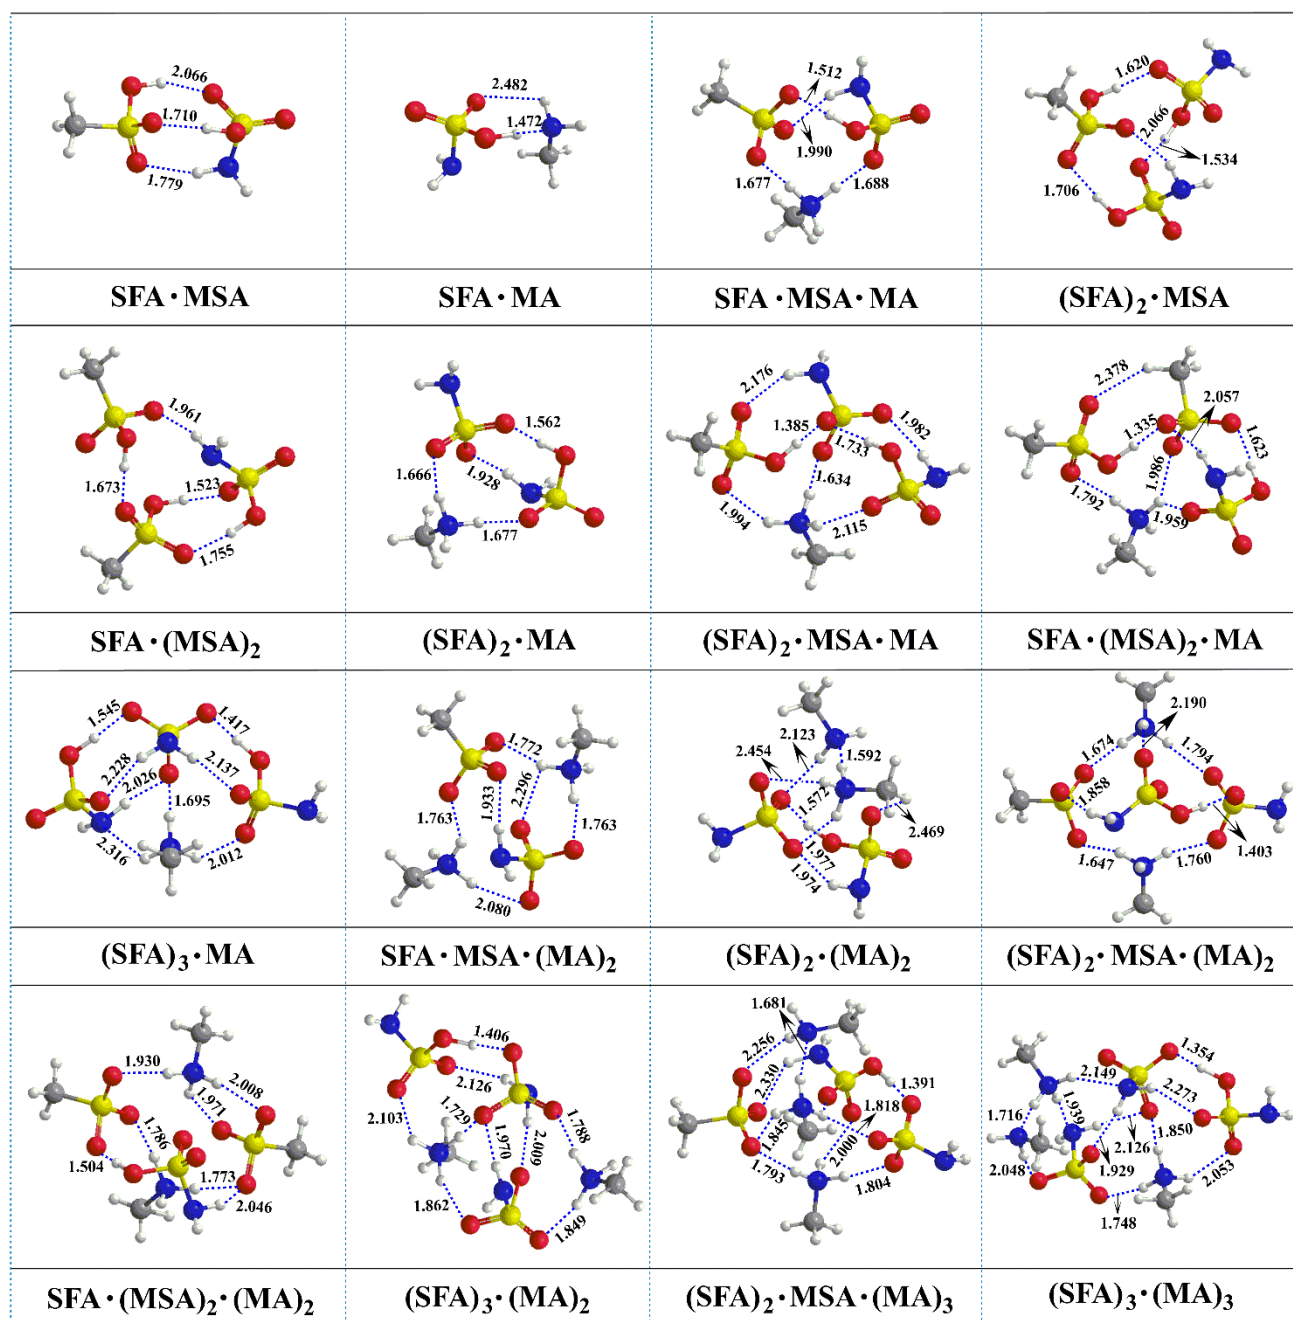

**Fig. S18** The most stable configurations of the SFA-MSA-MA-based clusters identified at the M06-2X/6-311++G(2df,2pd) level of theory. The lengths of hydrogen bonds are given in Å (Color code: blue = nitrogen, yellow = sulfur, red = oxygen, gray = carbon, and white = hydrogen)

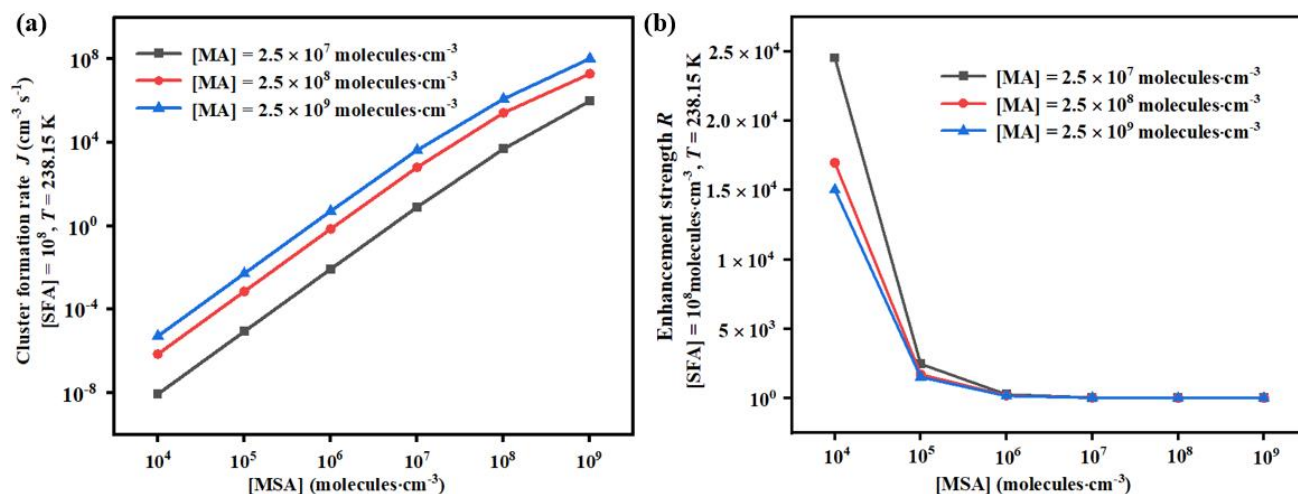

**Fig. S19** (a) The  $J$  ( $\text{cm}^{-3} \text{ s}^{-1}$ ) and (b)  $R$  as a function of  $[MSA]$  with  $[SFA] = 10^8 \text{ molecules cm}^{-3}$  and three different  $[MA]$  (black line:  $[MA] = 2.5 \times 10^7 \text{ molecules cm}^{-3}$ , red line:  $[MA] = 2.5 \times 10^8 \text{ molecules cm}^{-3}$ , blue line:  $[MA] = 2.5 \times 10^9 \text{ molecules cm}^{-3}$ ) at  $238.15 \text{ K}$

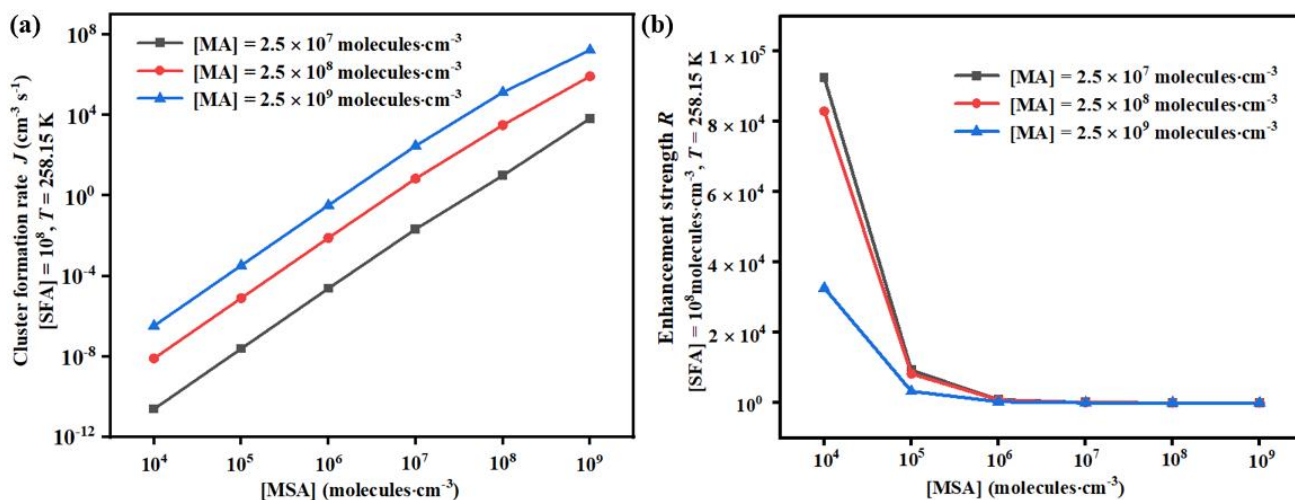

**Fig. S20** (a) The  $J$  ( $\text{cm}^{-3} \text{s}^{-1}$ ) and (b)  $R$  as a function of  $[\text{MSA}]$  with  $[\text{SFA}] = 10^8$  molecules  $\text{cm}^{-3}$  and three different  $[\text{MA}]$  (black line:  $[\text{MA}] = 2.5 \times 10^7$  molecules  $\text{cm}^{-3}$ , red line:  $[\text{MA}] = 2.5 \times 10^8$  molecules  $\text{cm}^{-3}$ , blue line:  $[\text{MA}] = 2.5 \times 10^9$  molecules  $\text{cm}^{-3}$ ) at 258.15 K

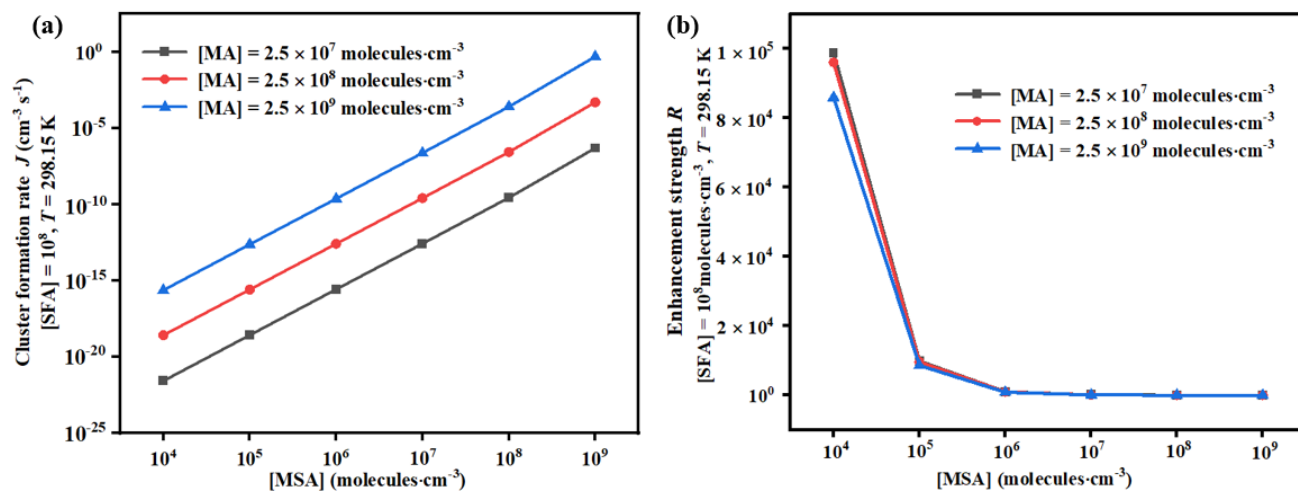

**Fig. S21** (a) The  $J$  ( $\text{cm}^3 \text{s}^{-1}$ ) and (b)  $R$  as a function of  $[MSA]$  with  $[SFA] = 10^8$  molecules  $\text{cm}^{-3}$  and three different  $[MA]$  (black line:  $[MA] = 2.5 \times 10^7$  molecules  $\text{cm}^{-3}$ , red line:  $[MA] = 2.5 \times 10^8$  molecules  $\text{cm}^{-3}$ , blue line:  $[MA] = 2.5 \times 10^9$  molecules  $\text{cm}^{-3}$ ) at 298.15 K

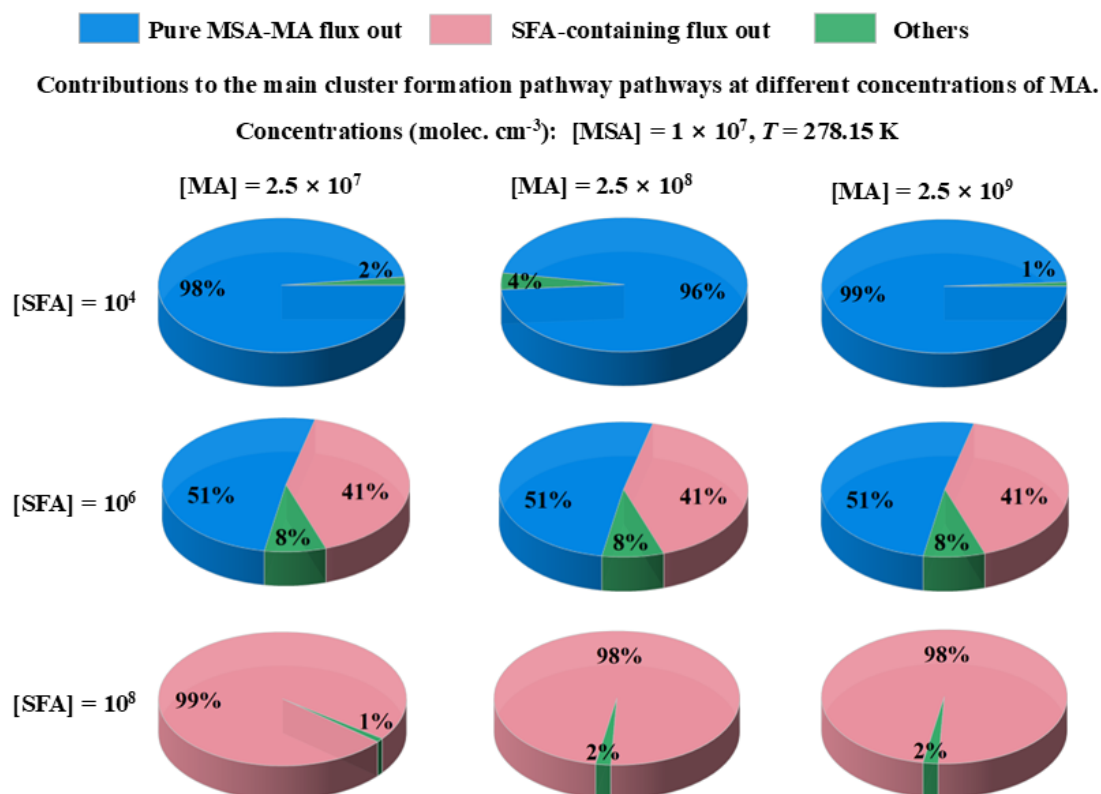

**Fig. S22.** The influence of [MA] on the relative contribution of the pure MSA-MA-based clustering pathway and the SFA participation pathway to the system flux is analyzed at 278.15 K, [MSA] =  $10^7$  molecules·cm<sup>-3</sup> and [SFA] =  $10^4$ ,  $10^6$  and  $10^8$  molecules·cm<sup>-3</sup>.

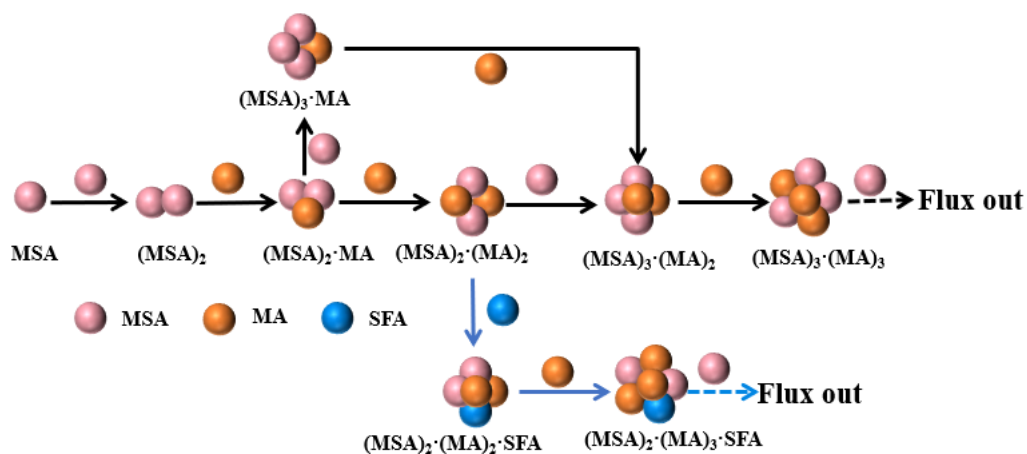

**Fig. S23** Main cluster formation mechanism of MSA-MA-SFA-based system at 238.15 K,  $[\text{MSA}] = 10^7$  molecules·cm<sup>-3</sup>,  $[\text{MA}] = 2.5 \times 10^8$  molecules·cm<sup>-3</sup>, and  $[\text{SFA}] = 10^6$  molecules·cm<sup>-3</sup>. The black arrows indicate the pure MSA-MA-based growth pathways. Blue arrows represent the pathways containing SFA

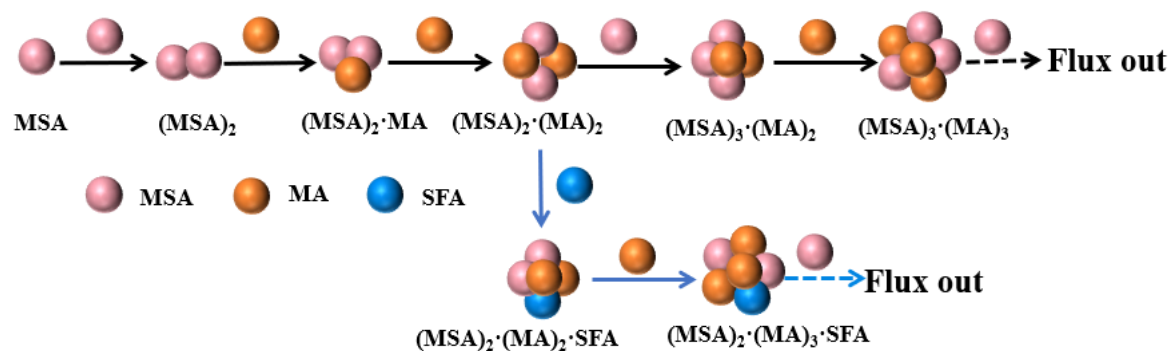

**Fig. S24** Main cluster formation mechanism of MSA-MA-SFA-based system at 258.15 K,  $[\text{MSA}] = 10^7$  molecules·cm<sup>-3</sup>,  $[\text{MA}] = 2.5 \times 10^8$  molecules·cm<sup>-3</sup>, and  $[\text{SFA}] = 10^6$  molecules·cm<sup>-3</sup>. The black arrows indicate the pure MSA-MA-based growth pathways. Blue arrows represent the pathways containing SFA



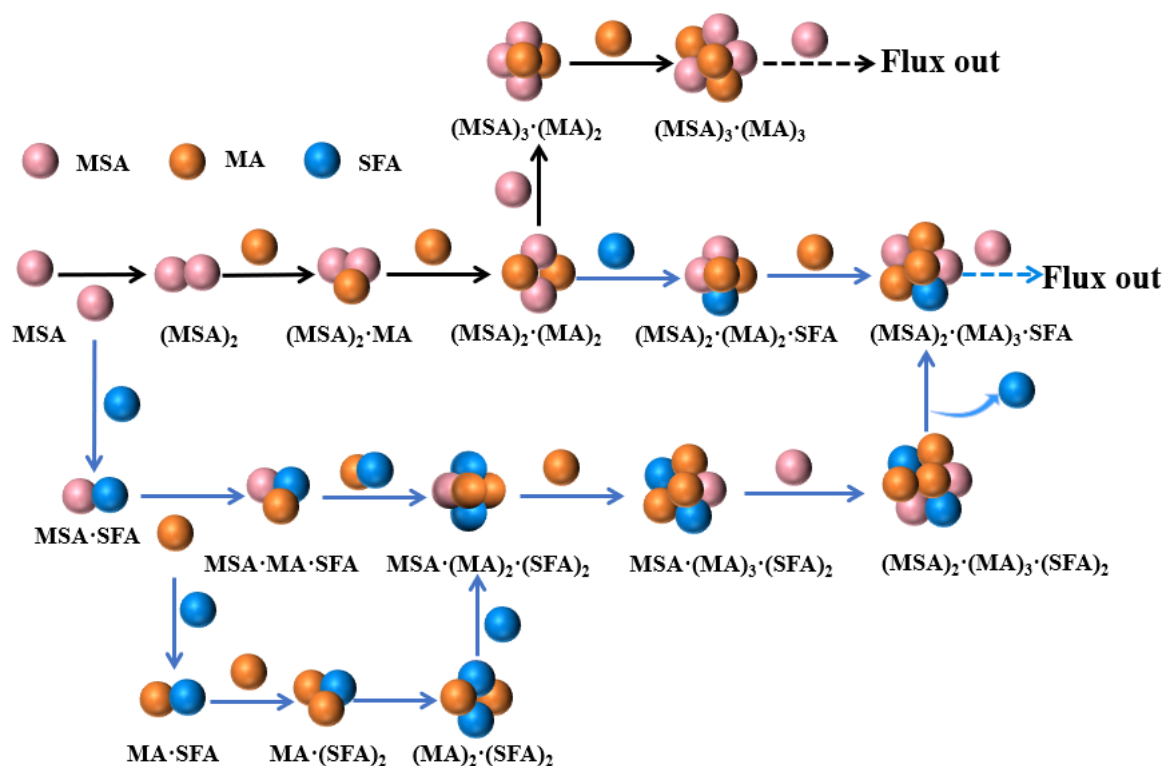

**Fig. S25** Main cluster formation mechanism of MSA-MA-SFA-based system at 298.15 K,  $[\text{MSA}] = 10^7$  molecules $\cdot\text{cm}^{-3}$ ,  $[\text{MA}] = 2.5 \times 10^8$  molecules $\cdot\text{cm}^{-3}$ , and  $[\text{SFA}] = 10^6$  molecules $\cdot\text{cm}^{-3}$ . The black arrows indicate the pure MSA-MA-based growth pathways. Blue arrows represent the pathways containing SFA

339 **Table S8** The Gibbs free energy for the formation of (SFA)<sub>x</sub>(MSA)<sub>y</sub>(MA)<sub>z</sub> ( $z \leq x + y \leq 3$ ) clusters  $\Delta G$  (kcal·mol<sup>-1</sup>)  
340 at pressure of 1 atm and temperatures of 298.15, 278.15, 258.15 and 238.15 K

| Clusters                                   | $T = 298.15$ K                  | $T = 278.15$ K | $T = 258.15$ K | $T = 238.15$ K |
|--------------------------------------------|---------------------------------|----------------|----------------|----------------|
| MSA·MA                                     | -6.19<br>(-5.32) <sup>a</sup>   | -6.87          | -7.56          | -8.25          |
| (MSA) <sub>2</sub>                         | -8.51<br>(-6.76) <sup>a</sup>   | -9.27          | -10.03         | -10.79         |
| (MSA) <sub>2</sub> ·MA                     | -21.17<br>(-20.36) <sup>a</sup> | -22.74         | -24.31         | -25.89         |
| (MSA) <sub>2</sub> ·(MA) <sub>2</sub>      | -34.05<br>(-34.97) <sup>a</sup> | -36.31         | -38.59         | -40.86         |
| (MSA) <sub>3</sub>                         | -11.44<br>(-11.31) <sup>a</sup> | -13.06         | -14.69         | -16.32         |
| (MSA) <sub>3</sub> ·MA                     | -30.29<br>(-31.68) <sup>a</sup> | -32.67         | -35.06         | -37.46         |
| (MSA) <sub>3</sub> ·(MA) <sub>2</sub>      | -46.76<br>(-46.45) <sup>a</sup> | -49.82         | -52.90         | -55.98         |
| (MSA) <sub>3</sub> ·(MA) <sub>3</sub>      | -59.17<br>(-59.33) <sup>a</sup> | -63.17         | -67.19         | -71.22         |
| (SFA) <sub>2</sub>                         | -5.74(-5.76) <sup>b</sup>       | -6.53          | -7.32          | -8.11          |
| MA·SFA                                     | -6.01                           | -6.73          | -7.45          | -8.17          |
| (MA) <sub>2</sub> ·(SFA) <sub>2</sub>      | -31.26                          | -33.53         | -35.81         | -38.09         |
| MA·(SFA) <sub>2</sub>                      | -23.85                          | -25.37         | -26.90         | -28.48         |
| MSA·SFA                                    | -9.33                           | -10.13         | -10.93         | -11.73         |
| MSA·MA·SFA                                 | -21.96                          | -23.57         | -25.18         | -26.79         |
| MSA·(MA) <sub>2</sub> ·SFA                 | -26.08                          | -28.48         | -30.89         | -33.31         |
| (SFA) <sub>3</sub>                         | -11.87                          | -13.56         | -15.27         | -16.97         |
| MSA <sub>2</sub> ·MA·SFA                   | -24.29                          | -26.66         | -29.05         | -31.44         |
| (MSA) <sub>2</sub> ·(MA) <sub>2</sub> ·SFA | -44.62                          | -47.82         | -51.03         | -54.25         |
| (MSA) <sub>2</sub> ·(MA) <sub>3</sub> ·SFA | -57.46                          | -61.43         | -65.42         | -69.41         |
| MSA·(SFA) <sub>2</sub>                     | -12.26                          | -13.89         | -15.52         | -17.15         |
| MA·(SFA) <sub>3</sub>                      | -29.46                          | -32.01         | -34.57         | -37.13         |
| MSA·(MA) <sub>2</sub> ·(SFA) <sub>2</sub>  | -45.12                          | -48.25         | -51.39         | -54.53         |
| (MSA) <sub>2</sub> ·SFA                    | -9.11                           | -10.75         | -12.40         | -14.06         |
| MSA·MA·(SFA) <sub>2</sub>                  | -31.11                          | -33.56         | -36.01         | -38.47         |
| (MA) <sub>2</sub> ·(SFA) <sub>3</sub>      | -44.04                          | -47.11         | -50.19         | -53.28         |
| MSA·(MA) <sub>3</sub> ·(SFA) <sub>2</sub>  | -62.91                          | -66.77         | -70.63         | -74.52         |
| (MA) <sub>3</sub> ·(SFA) <sub>3</sub>      | -53.82                          | -57.87         | -61.94         | -66.01         |

341 <sup>a</sup> The value was taken from reference (Liu, L., Yu, F., Tu, K., Yang, Z., and Zhang, X.: Influence of atmospheric conditions on the  
342 role of trifluoroacetic acid in atmospheric sulfuric acid-dimethylamine nucleation, Atmos. Chem. Phys., 21, 6221-6230,  
343 <https://doi.org/10.5194/acp-21-6221-2021>, 2021.)

344 <sup>b</sup> The value was taken from reference (Shen, J., Elm, J., Xie, H. B., Chen, J., Niu, J., and Vehkamäki, H.: Structural effects of amines  
345 in enhancing methanesulfonic acid-driven new particle formation, Environ. Sci. Technol., 54, 13498-13508,  
346 <https://doi.org/10.1021/acs.est.0c05358>, 2020.)

347 **Table S9** Evaporation rates  $\gamma$  ( $\text{s}^{-1}$ ) for the studied clusters at different temperatures of 298.15, 278.15, 258.15 and  
 348 238.15 K

| Evaporation pathways                                                                              | 298.15 K              | 278.15 K              | 258.15 K              | 238.15 K               |
|---------------------------------------------------------------------------------------------------|-----------------------|-----------------------|-----------------------|------------------------|
| $\text{MSA} \cdot \text{MA} \rightarrow \text{MSA} + \text{MA}$                                   | $1.05 \times 10^5$    | $1.44 \times 10^4$    | $1.43 \times 10^3$    | $9.62 \times 10^1$     |
| $\text{MSA} \cdot \text{SFA} \rightarrow \text{MSA} + \text{SFA}$                                 | $2.75 \times 10^2$    | $2.09 \times 10^1$    | $1.06 \times 10^0$    | $3.25 \times 10^{-2}$  |
| $\text{MA} \cdot \text{SFA} \rightarrow \text{MA} + \text{SFA}$                                   | $1.26 \times 10^5$    | $1.66 \times 10^4$    | $1.59 \times 10^3$    | $1.03 \times 10^2$     |
| $(\text{MSA})_2 \rightarrow \text{MSA} + \text{MSA}$                                              | $1.23 \times 10^3$    | $1.11 \times 10^2$    | $6.85 \times 10^0$    | $2.65 \times 10^{-1}$  |
| $(\text{SFA})_2 \rightarrow \text{SFA} + \text{SFA}$                                              | $1.05 \times 10^5$    | $1.26 \times 10^4$    | $1.08 \times 10^3$    | $6.08 \times 10^1$     |
| $(\text{MSA})_2 \cdot \text{MA} \rightarrow (\text{MSA})_2 + \text{MA}$                           | $2.90 \times 10^0$    | $1.43 \times 10^{-1}$ | $4.43 \times 10^{-3}$ | $7.64 \times 10^{-5}$  |
| $(\text{MSA})_2 \cdot \text{MA} \rightarrow \text{MSA} \cdot \text{MA} + \text{MSA}$              | $2.84 \times 10^{-2}$ | $9.29 \times 10^{-4}$ | $1.79 \times 10^{-5}$ | $1.77 \times 10^{-7}$  |
| $(\text{MSA})_2 \cdot (\text{MA})_2 \rightarrow (\text{MSA})_2 \cdot \text{MA} + \text{MA}$       | $1.96 \times 10^0$    | $1.17 \times 10^{-1}$ | $4.48 \times 10^{-3}$ | $9.83 \times 10^{-5}$  |
| $\text{MA} \cdot (\text{SFA})_2 \rightarrow (\text{SFA})_2 + \text{MA}$                           | $2.82 \times 10^{-4}$ | $8.28 \times 10^{-6}$ | $1.41 \times 10^{-7}$ | $1.21 \times 10^{-9}$  |
| $\text{MA} \cdot (\text{SFA})_2 \rightarrow \text{MA} \cdot \text{SFA} + \text{SFA}$              | $1.95 \times 10^{-4}$ | $5.22 \times 10^{-6}$ | $7.93 \times 10^{-8}$ | $5.96 \times 10^{-10}$ |
| $(\text{MA})_2 \cdot (\text{SFA})_2 \rightarrow \text{MA} \cdot (\text{SFA})_2 + \text{MA}$       | $1.93 \times 10^4$    | $2.04 \times 10^3$    | $1.50 \times 10^2$    | $7.06 \times 10^0$     |
| $(\text{MSA})_2 \cdot \text{SFA} \rightarrow (\text{MSA})_2 + \text{SFA}$                         | $8.88 \times 10^8$    | $1.66 \times 10^8$    | $2.37 \times 10^7$    | $2.43 \times 10^6$     |
| $(\text{MSA})_2 \cdot \text{SFA} \rightarrow \text{MSA} \cdot \text{SFA} + \text{MSA}$            | $3.81 \times 10^9$    | $8.44 \times 10^8$    | $1.48 \times 10^8$    | $1.91 \times 10^7$     |
| $\text{MSA} \cdot (\text{SFA})_2 \rightarrow (\text{SFA})_2 + \text{MSA}$                         | $4.27 \times 10^4$    | $4.24 \times 10^3$    | $2.94 \times 10^2$    | $1.30 \times 10^1$     |
| $\text{MSA} \cdot (\text{SFA})_2 \rightarrow \text{MSA} \cdot \text{SFA} + \text{SFA}$            | $1.69 \times 10^7$    | $2.66 \times 10^6$    | $3.11 \times 10^5$    | $2.53 \times 10^4$     |
| $(\text{MSA})_3 \rightarrow (\text{MSA})_2 + \text{MSA}$                                          | $1.89 \times 10^7$    | $2.78 \times 10^6$    | $3.01 \times 10^5$    | $2.23 \times 10^4$     |
| $(\text{SFA})_3 \rightarrow (\text{SFA})_2 + \text{SFA}$                                          | $7.60 \times 10^4$    | $6.96 \times 10^3$    | $4.38 \times 10^2$    | $1.74 \times 10^1$     |
| $(\text{MSA})_3 \cdot \text{MA} \rightarrow (\text{MSA})_2 \cdot \text{MA} + \text{MSA}$          | $5.28 \times 10^2$    | $4.00 \times 10^1$    | $2.01 \times 10^0$    | $6.10 \times 10^{-2}$  |
| $(\text{MSA})_3 \cdot \text{MA} \rightarrow (\text{MSA})_3 + \text{MA}$                           | $7.77 \times 10^{-5}$ | $1.98 \times 10^{-6}$ | $2.85 \times 10^{-8}$ | $2.01 \times 10^{-10}$ |
| $(\text{MSA})_3 \cdot (\text{MA})_2 \rightarrow (\text{MSA})_2 \cdot (\text{MA})_2 + \text{MSA}$  | $1.44 \times 10^0$    | $7.28 \times 10^{-2}$ | $2.30 \times 10^{-3}$ | $4.04 \times 10^{-5}$  |
| $(\text{MSA})_3 \cdot (\text{MA})_2 \rightarrow (\text{MSA})_3 \cdot \text{MA} + \text{MA}$       | $4.74 \times 10^{-3}$ | $1.88 \times 10^{-4}$ | $4.50 \times 10^{-6}$ | $5.73 \times 10^{-8}$  |
| $(\text{MSA})_3 \cdot (\text{MA})_3 \rightarrow (\text{MSA})_3 \cdot (\text{MA})_2 + \text{MA}$   | $8.39 \times 10^2$    | $4.86 \times 10^1$    | $1.81 \times 10^0$    | $3.82 \times 10^{-2}$  |
| $\text{MA} \cdot (\text{SFA})_3 \rightarrow \text{MA} \cdot (\text{SFA})_2 + \text{SFA}$          | $1.74 \times 10^5$    | $1.36 \times 10^4$    | $7.16 \times 10^2$    | $2.28 \times 10^1$     |
| $\text{MA} \cdot (\text{SFA})_3 \rightarrow (\text{SFA})_3 + \text{MA}$                           | $7.03 \times 10^{-4}$ | $1.76 \times 10^{-5}$ | $2.50 \times 10^{-7}$ | $1.73 \times 10^{-9}$  |
| $(\text{MA})_2 \cdot (\text{SFA})_3 \rightarrow (\text{MA})_2 \cdot (\text{SFA})_2 + \text{SFA}$  | $1.09 \times 10^0$    | $5.40 \times 10^{-2}$ | $1.67 \times 10^{-3}$ | $2.87 \times 10^{-5}$  |
| $(\text{MA})_2 \cdot (\text{SFA})_3 \rightarrow \text{MA} \cdot (\text{SFA})_3 + \text{MA}$       | $1.35 \times 10^{-1}$ | $9.04 \times 10^{-3}$ | $3.92 \times 10^{-4}$ | $9.95 \times 10^{-6}$  |
| $(\text{MA})_3 \cdot (\text{SFA})_3 \rightarrow (\text{MA})_2 \cdot (\text{SFA})_3 + \text{MA}$   | $3.03 \times 10^6$    | $3.94 \times 10^5$    | $3.71 \times 10^4$    | $2.33 \times 10^3$     |
| $\text{MSA} \cdot \text{SFA} \cdot \text{MA} \rightarrow \text{MA} \cdot \text{SFA} + \text{MSA}$ | $5.18 \times 10^{-3}$ | $1.50 \times 10^{-4}$ | $2.50 \times 10^{-6}$ | $2.09 \times 10^{-8}$  |

| Evaporation pathways                                                                                                              | 298.15 K              | 278.15 K              | 258.15 K              | 238.15 K               |
|-----------------------------------------------------------------------------------------------------------------------------------|-----------------------|-----------------------|-----------------------|------------------------|
| $\text{MSA} \cdot \text{MA} \cdot \text{SFA} \rightarrow \text{MSA} \cdot \text{MA} + \text{SFA}$                                 | $6.71 \times 10^{-3}$ | $1.88 \times 10^{-4}$ | $3.01 \times 10^{-6}$ | $2.41 \times 10^{-8}$  |
| $\text{MSA} \cdot \text{MA} \cdot \text{SFA} \rightarrow \text{MSA} \cdot \text{SFA} + \text{MA}$                                 | $2.95 \times 10^0$    | $1.48 \times 10^{-1}$ | $4.67 \times 10^{-3}$ | $8.22 \times 10^{-5}$  |
| $\text{MSA} \cdot (\text{MA})_2 \cdot \text{SFA} \rightarrow \text{MSA} \cdot \text{MA} \cdot \text{SFA} + \text{MA}$             | $5.20 \times 10^6$    | $7.41 \times 10^5$    | $7.78 \times 10^4$    | $5.55 \times 10^3$     |
| $(\text{MSA})_2 \cdot \text{MA} \cdot \text{SFA} \rightarrow \text{MSA} \cdot \text{MA} \cdot \text{SFA} + \text{MSA}$            | $5.01 \times 10^7$    | $9.32 \times 10^6$    | $1.32 \times 10^6$    | $1.33 \times 10^5$     |
| $(\text{MSA})_2 \cdot \text{MA} \cdot \text{SFA} \rightarrow (\text{MSA})_2 \cdot \text{MA} + \text{SFA}$                         | $1.22 \times 10^7$    | $1.93 \times 10^6$    | $2.28 \times 10^5$    | $1.86 \times 10^4$     |
| $(\text{MSA})_2 \cdot \text{MA} \cdot \text{SFA} \rightarrow (\text{MSA})_2 \cdot \text{SFA} + \text{MA}$                         | $3.96 \times 10^{-2}$ | $1.67 \times 10^{-3}$ | $4.26 \times 10^{-5}$ | $5.85 \times 10^{-7}$  |
| $(\text{MSA})_2 \cdot (\text{MA})_2 \cdot \text{SFA} \rightarrow \text{MSA} \cdot (\text{MA})_2 \cdot \text{SFA} + \text{MSA}$    | $7.15 \times 10^{-5}$ | $1.78 \times 10^{-6}$ | $2.48 \times 10^{-8}$ | $1.68 \times 10^{-10}$ |
| $(\text{MSA})_2 \cdot (\text{MA})_2 \cdot \text{SFA} \rightarrow (\text{MSA})_2 \cdot (\text{MA})_2 + \text{SFA}$                 | $4.97 \times 10^1$    | $2.53 \times 10^0$    | $8.06 \times 10^{-2}$ | $1.43 \times 10^{-3}$  |
| $(\text{MSA})_2 \cdot (\text{MA})_2 \cdot \text{SFA} \rightarrow (\text{MSA})_2 \cdot \text{MA} \cdot \text{SFA} + \text{MA}$     | $8.46 \times 10^{-6}$ | $1.62 \times 10^{-7}$ | $1.67 \times 10^{-9}$ | $7.97 \times 10^{-12}$ |
| $(\text{MSA})_2 \cdot (\text{MA})_3 \cdot \text{SFA} \rightarrow (\text{MSA})_2 \cdot (\text{MA})_2 \cdot \text{SFA} + \text{MA}$ | $2.58 \times 10^0$    | $1.35 \times 10^{-1}$ | $4.42 \times 10^{-3}$ | $8.09 \times 10^{-5}$  |
| $\text{MSA} \cdot \text{MA} \cdot (\text{SFA})_2 \rightarrow \text{MA} \cdot (\text{SFA})_2 + \text{MSA}$                         | $1.17 \times 10^4$    | $9.09 \times 10^2$    | $4.72 \times 10^1$    | $1.48 \times 10^0$     |
| $\text{MSA} \cdot \text{MA} \cdot (\text{SFA})_2 \rightarrow \text{MSA} \cdot \text{MA} \cdot \text{SFA} + \text{SFA}$            | $4.54 \times 10^2$    | $3.26 \times 10^1$    | $1.54 \times 10^0$    | $4.35 \times 10^{-2}$  |
| $\text{MSA} \cdot \text{MA} \cdot (\text{SFA})_2 \rightarrow \text{MSA} \cdot (\text{SFA})_2 + \text{MA}$                         | $8.61 \times 10^{-5}$ | $1.98 \times 10^{-6}$ | $2.52 \times 10^{-8}$ | $1.54 \times 10^{-10}$ |
| $\text{MSA} \cdot (\text{MA})_2 \cdot (\text{SFA})_2 \rightarrow (\text{MA})_2 \cdot (\text{SFA})_2 + \text{MSA}$                 | $1.90 \times 10^{-1}$ | $7.44 \times 10^{-3}$ | $1.76 \times 10^{-4}$ | $2.21 \times 10^{-6}$  |
| $\text{MSA} \cdot (\text{MA})_2 \cdot (\text{SFA})_2 \rightarrow \text{MSA} \cdot (\text{MA})_2 \cdot \text{SFA} + \text{SFA}$    | $2.81 \times 10^{-5}$ | $7.52 \times 10^{-7}$ | $1.14 \times 10^{-8}$ | $8.49 \times 10^{-11}$ |
| $\text{MSA} \cdot (\text{MA})_2 \cdot (\text{SFA})_2 \rightarrow \text{MSA} \cdot \text{MA} \cdot (\text{SFA})_2 + \text{MA}$     | $2.85 \times 10^{-1}$ | $1.51 \times 10^{-2}$ | $5.07 \times 10^{-4}$ | $9.58 \times 10^{-6}$  |
| $\text{MSA} \cdot (\text{MA})_3 \cdot (\text{SFA})_2 \rightarrow \text{MSA} \cdot (\text{MA})_2 \cdot (\text{SFA})_2 + \text{MA}$ | $2.24 \times 10^5$    | $2.99 \times 10^4$    | $2.91 \times 10^3$    | $1.91 \times 10^2$     |

| Collisions                                  | $\beta$ ( $\text{cm}^3\cdot\text{s}^{-1}$ ) |                        |                        |                        |
|---------------------------------------------|---------------------------------------------|------------------------|------------------------|------------------------|
|                                             | 298.15 K                                    | 278.15 K               | 258.15 K               | 238.15 K               |
| MSA + MA                                    | $1.48 \times 10^{-10}$                      | $1.38 \times 10^{-10}$ | $1.28 \times 10^{-10}$ | $1.18 \times 10^{-10}$ |
| MSA + SFA                                   | $7.78 \times 10^{-11}$                      | $7.26 \times 10^{-11}$ | $6.73 \times 10^{-11}$ | $6.21 \times 10^{-11}$ |
| MA + SFA                                    | $1.31 \times 10^{-10}$                      | $1.22 \times 10^{-10}$ | $1.14 \times 10^{-10}$ | $1.05 \times 10^{-10}$ |
| MSA + MSA                                   | $8.68 \times 10^{-11}$                      | $8.10 \times 10^{-11}$ | $7.52 \times 10^{-11}$ | $6.94 \times 10^{-11}$ |
| SFA + SFA                                   | $6.93 \times 10^{-11}$                      | $6.46 \times 10^{-11}$ | $6.00 \times 10^{-11}$ | $5.53 \times 10^{-11}$ |
| (MSA) <sub>2</sub> + MA                     | $2.23 \times 10^{-10}$                      | $2.08 \times 10^{-10}$ | $1.93 \times 10^{-10}$ | $1.78 \times 10^{-10}$ |
| MSA·MA + MSA                                | $1.11 \times 10^{-10}$                      | $1.03 \times 10^{-10}$ | $9.58 \times 10^{-11}$ | $8.84 \times 10^{-11}$ |
| (MSA) <sub>2</sub> ·MA + MA                 | $2.24 \times 10^{-10}$                      | $2.09 \times 10^{-10}$ | $1.94 \times 10^{-10}$ | $1.79 \times 10^{-10}$ |
| (SFA) <sub>2</sub> + MA                     | $2.17 \times 10^{-10}$                      | $2.02 \times 10^{-10}$ | $1.88 \times 10^{-10}$ | $1.73 \times 10^{-10}$ |
| MA·SFA + SFA                                | $9.54 \times 10^{-11}$                      | $8.90 \times 10^{-11}$ | $8.26 \times 10^{-11}$ | $7.62 \times 10^{-11}$ |
| MA·(SFA) <sub>2</sub> + MA                  | $2.14 \times 10^{-10}$                      | $1.99 \times 10^{-10}$ | $1.85 \times 10^{-10}$ | $1.71 \times 10^{-10}$ |
| (MSA) <sub>2</sub> + SFA                    | $9.84 \times 10^{-11}$                      | $9.18 \times 10^{-11}$ | $8.52 \times 10^{-11}$ | $7.86 \times 10^{-11}$ |
| MSA·SFA + MSA                               | $1.06 \times 10^{-10}$                      | $9.89 \times 10^{-11}$ | $9.18 \times 10^{-11}$ | $8.47 \times 10^{-11}$ |
| (SFA) <sub>2</sub> + MSA                    | $1.04 \times 10^{-10}$                      | $9.73 \times 10^{-11}$ | $9.03 \times 10^{-11}$ | $8.33 \times 10^{-11}$ |
| MSA·SFA + SFA                               | $9.70 \times 10^{-11}$                      | $9.05 \times 10^{-11}$ | $8.40 \times 10^{-11}$ | $7.75 \times 10^{-11}$ |
| (MSA) <sub>2</sub> + MSA                    | $1.07 \times 10^{-10}$                      | $1.00 \times 10^{-10}$ | $9.30 \times 10^{-11}$ | $8.58 \times 10^{-11}$ |
| (SFA) <sub>2</sub> + SFA                    | $9.54 \times 10^{-11}$                      | $8.90 \times 10^{-11}$ | $8.26 \times 10^{-11}$ | $7.62 \times 10^{-11}$ |
| (MSA) <sub>2</sub> ·MA + MSA                | $1.05 \times 10^{-10}$                      | $9.77 \times 10^{-11}$ | $9.07 \times 10^{-11}$ | $8.36 \times 10^{-11}$ |
| (MSA) <sub>3</sub> + MA                     | $2.09 \times 10^{-10}$                      | $1.95 \times 10^{-10}$ | $1.81 \times 10^{-10}$ | $1.67 \times 10^{-10}$ |
| (MSA) <sub>2</sub> ·(MA) <sub>2</sub> + MSA | $1.23 \times 10^{-10}$                      | $1.15 \times 10^{-10}$ | $1.07 \times 10^{-10}$ | $9.83 \times 10^{-11}$ |
| (MSA) <sub>3</sub> ·MA + MA                 | $2.32 \times 10^{-10}$                      | $2.16 \times 10^{-10}$ | $2.01 \times 10^{-10}$ | $1.85 \times 10^{-10}$ |
| (MSA) <sub>3</sub> ·(MA) <sub>2</sub> + MA  | $2.72 \times 10^{-10}$                      | $2.53 \times 10^{-10}$ | $2.35 \times 10^{-10}$ | $2.17 \times 10^{-10}$ |
| MA·(SFA) <sub>2</sub> + SFA                 | $9.15 \times 10^{-11}$                      | $8.54 \times 10^{-11}$ | $7.92 \times 10^{-11}$ | $7.31 \times 10^{-11}$ |
| (SFA) <sub>3</sub> + MA                     | $2.26 \times 10^{-10}$                      | $2.11 \times 10^{-10}$ | $1.96 \times 10^{-10}$ | $1.81 \times 10^{-10}$ |
| (MA) <sub>2</sub> ·(SFA) <sub>2</sub> + SFA | $1.03 \times 10^{-10}$                      | $9.64 \times 10^{-11}$ | $8.94 \times 10^{-11}$ | $8.25 \times 10^{-11}$ |
| MA·(SFA) <sub>3</sub> + MA                  | $2.70 \times 10^{-10}$                      | $2.52 \times 10^{-10}$ | $2.34 \times 10^{-10}$ | $2.16 \times 10^{-10}$ |
| (MA) <sub>2</sub> ·(SFA) <sub>3</sub> + MA  | $2.48 \times 10^{-10}$                      | $2.31 \times 10^{-10}$ | $2.14 \times 10^{-10}$ | $1.98 \times 10^{-10}$ |
| MA·SFA + MSA                                | $1.05 \times 10^{-10}$                      | $9.78 \times 10^{-11}$ | $9.08 \times 10^{-11}$ | $8.38 \times 10^{-11}$ |
| MSA·MA + SFA                                | $1.01 \times 10^{-10}$                      | $9.41 \times 10^{-11}$ | $8.74 \times 10^{-11}$ | $8.06 \times 10^{-11}$ |
| MSA·SFA + MA                                | $2.20 \times 10^{-10}$                      | $2.05 \times 10^{-10}$ | $1.91 \times 10^{-10}$ | $1.76 \times 10^{-10}$ |
| MSA·MA·SFA + MA                             | $2.19 \times 10^{-10}$                      | $2.05 \times 10^{-10}$ | $1.90 \times 10^{-10}$ | $1.75 \times 10^{-10}$ |
| MSA·MA·SFA + MSA                            | $1.03 \times 10^{-10}$                      | $9.57 \times 10^{-11}$ | $8.88 \times 10^{-11}$ | $8.19 \times 10^{-11}$ |

| Collisions                                      | $\beta$ (cm <sup>3</sup> ·s <sup>-1</sup> ) |                        |                        |                        |
|-------------------------------------------------|---------------------------------------------|------------------------|------------------------|------------------------|
|                                                 | 298.15 K                                    | 278.15 K               | 258.15 K               | 238.15 K               |
| (MSA) <sub>2</sub> ·MA + SFA                    | $9.59 \times 10^{-11}$                      | $8.95 \times 10^{-11}$ | $8.31 \times 10^{-11}$ | $7.66 \times 10^{-11}$ |
| (MSA) <sub>2</sub> ·SFA + MA                    | $2.17 \times 10^{-10}$                      | $2.03 \times 10^{-10}$ | $1.88 \times 10^{-10}$ | $1.73 \times 10^{-10}$ |
| MSA·(MA) <sub>2</sub> ·SFA + MSA                | $1.14 \times 10^{-10}$                      | $1.07 \times 10^{-10}$ | $9.91 \times 10^{-11}$ | $9.14 \times 10^{-11}$ |
| (MSA) <sub>2</sub> ·(MA) <sub>2</sub> + SFA     | $1.14 \times 10^{-10}$                      | $1.06 \times 10^{-10}$ | $9.83 \times 10^{-11}$ | $9.07 \times 10^{-11}$ |
| (MSA) <sub>2</sub> ·MA·SFA + MA                 | $2.80 \times 10^{-10}$                      | $2.61 \times 10^{-10}$ | $2.42 \times 10^{-10}$ | $2.23 \times 10^{-10}$ |
| (MSA) <sub>2</sub> ·(MA) <sub>2</sub> ·SFA + MA | $2.73 \times 10^{-10}$                      | $2.55 \times 10^{-10}$ | $2.37 \times 10^{-10}$ | $2.18 \times 10^{-10}$ |
| MA·(SFA) <sub>2</sub> + MSA                     | $1.00 \times 10^{-10}$                      | $9.34 \times 10^{-11}$ | $8.67 \times 10^{-11}$ | $7.99 \times 10^{-11}$ |
| MSA·MA·SFA + SFA                                | $9.39 \times 10^{-11}$                      | $8.76 \times 10^{-11}$ | $8.13 \times 10^{-11}$ | $7.50 \times 10^{-11}$ |
| MSA·(SFA) <sub>2</sub> + MA                     | $2.32 \times 10^{-10}$                      | $2.16 \times 10^{-10}$ | $2.01 \times 10^{-10}$ | $1.85 \times 10^{-10}$ |
| (MA) <sub>2</sub> ·(SFA) <sub>2</sub> + MSA     | $1.12 \times 10^{-10}$                      | $1.05 \times 10^{-10}$ | $9.72 \times 10^{-11}$ | $8.97 \times 10^{-11}$ |
| MSA·(MA) <sub>2</sub> ·SFA + SFA                | $1.05 \times 10^{-10}$                      | $9.83 \times 10^{-11}$ | $9.12 \times 10^{-11}$ | $8.42 \times 10^{-11}$ |
| MSA·MA·(SFA) <sub>2</sub> + MA                  | $6.02 \times 10^{-10}$                      | $5.61 \times 10^{-10}$ | $5.21 \times 10^{-10}$ | $4.81 \times 10^{-10}$ |
| MSA·(MA) <sub>2</sub> ·(SFA) <sub>2</sub> + MA  | $2.80 \times 10^{-10}$                      | $2.61 \times 10^{-10}$ | $2.43 \times 10^{-10}$ | $2.24 \times 10^{-10}$ |

352 **Table S11** Total evaporation coefficients ( $\sum\gamma$ , s<sup>-1</sup>) for each cluster in the present study

| Clusters                                   | $\sum\gamma$ , (s <sup>-1</sup> ) |                       |                       |                       |
|--------------------------------------------|-----------------------------------|-----------------------|-----------------------|-----------------------|
|                                            | 298.15 K                          | 278.15 K              | 258.15 K              | 238.15 K              |
| MSA·MA                                     | $1.05 \times 10^5$                | $1.43 \times 10^4$    | $1.43 \times 10^3$    | $9.62 \times 10^1$    |
| MSA·SFA                                    | $8.03 \times 10^4$                | $1.02 \times 10^4$    | $9.35 \times 10^2$    | $5.72 \times 10^1$    |
| MA·SFA                                     | $9.48 \times 10^5$                | $1.59 \times 10^5$    | $2.00 \times 10^4$    | $1.77 \times 10^3$    |
| (MSA) <sub>2</sub>                         | $1.22 \times 10^3$                | $1.10 \times 10^2$    | $6.82 \times 10^0$    | $2.64 \times 10^{-1}$ |
| (SFA) <sub>2</sub>                         | $1.41 \times 10^5$                | $1.84 \times 10^4$    | $1.73 \times 10^3$    | $1.09 \times 10^2$    |
| (MSA) <sub>2</sub> ·MA                     | $2.93 \times 10^0$                | $1.44 \times 10^{-1}$ | $4.45 \times 10^{-3}$ | $7.66 \times 10^{-5}$ |
| (MSA) <sub>2</sub> ·(MA) <sub>2</sub>      | $1.90 \times 10^0$                | $1.13 \times 10^{-1}$ | $4.33 \times 10^{-3}$ | $9.50 \times 10^{-5}$ |
| MA·(SFA) <sub>2</sub>                      | $4.77 \times 10^{-4}$             | $1.35 \times 10^{-5}$ | $2.20 \times 10^{-7}$ | $1.80 \times 10^{-9}$ |
| (MA) <sub>2</sub> ·(SFA) <sub>2</sub>      | $1.72 \times 10^8$                | $4.27 \times 10^7$    | $8.45 \times 10^6$    | $1.26 \times 10^6$    |
| (MSA) <sub>2</sub> ·SFA                    | $4.70 \times 10^9$                | $1.01 \times 10^9$    | $1.71 \times 10^8$    | $2.15 \times 10^7$    |
| MSA·(SFA) <sub>2</sub>                     | $1.70 \times 10^7$                | $2.66 \times 10^6$    | $3.12 \times 10^5$    | $2.54 \times 10^4$    |
| (MSA) <sub>3</sub>                         | $1.89 \times 10^7$                | $2.77 \times 10^6$    | $3.01 \times 10^5$    | $2.23 \times 10^4$    |
| (SFA) <sub>3</sub>                         | $2.37 \times 10^{11}$             | $8.47 \times 10^{10}$ | $2.55 \times 10^{10}$ | $6.20 \times 10^9$    |
| (MSA) <sub>3</sub> ·MA                     | $5.28 \times 10^2$                | $4.00 \times 10^1$    | $2.01 \times 10^0$    | $6.10 \times 10^{-2}$ |
| (MSA) <sub>3</sub> ·(MA) <sub>2</sub>      | $1.45 \times 10^0$                | $7.30 \times 10^{-2}$ | $2.30 \times 10^{-3}$ | $4.04 \times 10^{-5}$ |
| (MSA) <sub>3</sub> ·(MA) <sub>3</sub>      | $5.41 \times 10^0$                | $2.18 \times 10^{-1}$ | $5.32 \times 10^{-3}$ | $6.89 \times 10^{-5}$ |
| MA·(SFA) <sub>3</sub>                      | $1.74 \times 10^5$                | $1.36 \times 10^4$    | $7.16 \times 10^2$    | $2.28 \times 10^1$    |
| (MA) <sub>2</sub> ·(SFA) <sub>3</sub>      | $1.22 \times 10^0$                | $6.30 \times 10^{-2}$ | $2.06 \times 10^{-3}$ | $3.87 \times 10^{-5}$ |
| (MA) <sub>3</sub> ·(SFA) <sub>3</sub>      | $2.61 \times 10^9$                | $3.62 \times 10^8$    | $3.69 \times 10^7$    | $2.55 \times 10^6$    |
| MSA·MA·SFA                                 | $2.96 \times 10^0$                | $1.49 \times 10^{-1}$ | $4.68 \times 10^{-3}$ | $8.23 \times 10^{-5}$ |
| MSA·(MA) <sub>2</sub> ·SFA                 | $3.32 \times 10^3$                | $2.77 \times 10^2$    | $1.56 \times 10^1$    | $5.39 \times 10^{-1}$ |
| MSA <sub>2</sub> ·MA·SFA                   | $6.23 \times 10^7$                | $1.12 \times 10^7$    | $1.55 \times 10^6$    | $1.52 \times 10^5$    |
| (MSA) <sub>2</sub> ·(MA) <sub>2</sub> ·SFA | $4.97 \times 10^1$                | $2.53 \times 10^0$    | $8.06 \times 10^{-2}$ | $1.43 \times 10^{-3}$ |
| (MSA) <sub>2</sub> ·(MA) <sub>3</sub> ·SFA | $1.43 \times 10^2$                | $1.42 \times 10^1$    | $9.83 \times 10^{-1}$ | $4.29 \times 10^{-2}$ |
| MSA·MA·(SFA) <sub>2</sub>                  | $1.21 \times 10^4$                | $9.41 \times 10^2$    | $4.88 \times 10^1$    | $1.52 \times 10^0$    |
| MSA·(MA) <sub>2</sub> ·(SFA) <sub>2</sub>  | $9.77 \times 10^{-1}$             | $4.92 \times 10^{-2}$ | $1.58 \times 10^{-3}$ | $2.87 \times 10^{-5}$ |
| MSA·(MA) <sub>3</sub> ·(SFA) <sub>2</sub>  | $5.53 \times 10^2$                | $5.38 \times 10^1$    | $3.67 \times 10^0$    | $1.60 \times 10^{-1}$ |

**Table S12** Ratios ( $\beta \cdot C / \Sigma \gamma$ ) between monomer molecule collisions and evaporation coefficients for each cluster involving SFA in the present study ([MSA] =  $1.0 \times 10^7$  molecules·cm<sup>-3</sup>, [MA] =  $2.5 \times 10^7$  molecules·cm<sup>-3</sup>, [SFA] =  $1.0 \times 10^7$  molecules·cm<sup>-3</sup>)

|                                            |  | $(\beta \cdot C / \Sigma \gamma)$ |                        |                        |                        |
|--------------------------------------------|--|-----------------------------------|------------------------|------------------------|------------------------|
| Clusters                                   |  | 298.15 K                          | 278.15 K               | 258.15 K               | 238.15 K               |
| Collision with MSA monomer: $C =$          |  |                                   |                        |                        |                        |
| [MSA]                                      |  |                                   |                        |                        |                        |
| MSA·MA                                     |  | $1.05 \times 10^{-14}$            | $7.21 \times 10^{-14}$ | $6.72 \times 10^{-13}$ | $9.19 \times 10^{-12}$ |
| MSA·SFA                                    |  | $1.32 \times 10^{-14}$            | $9.71 \times 10^{-14}$ | $9.81 \times 10^{-13}$ | $1.48 \times 10^{-11}$ |
| MA·SFA                                     |  | $1.11 \times 10^{-15}$            | $6.17 \times 10^{-15}$ | $4.54 \times 10^{-14}$ | $4.73 \times 10^{-13}$ |
| (MSA) <sub>2</sub>                         |  | $8.82 \times 10^{-13}$            | $9.11 \times 10^{-12}$ | $1.36 \times 10^{-10}$ | $3.25 \times 10^{-9}$  |
| (SFA) <sub>2</sub>                         |  | $7.38 \times 10^{-15}$            | $5.30 \times 10^{-14}$ | $5.22 \times 10^{-13}$ | $7.65 \times 10^{-12}$ |
| (MSA) <sub>2</sub> ·MA                     |  | $3.58 \times 10^{-10}$            | $6.77 \times 10^{-9}$  | $2.04 \times 10^{-7}$  | $1.09 \times 10^{-5}$  |
| (MSA) <sub>2</sub> ·(MA) <sub>2</sub>      |  | $6.48 \times 10^{-10}$            | $1.01 \times 10^{-8}$  | $2.46 \times 10^{-7}$  | $1.03 \times 10^{-5}$  |
| MA·(SFA) <sub>2</sub>                      |  | $2.10 \times 10^{-6}$             | $6.92 \times 10^{-5}$  | $3.94 \times 10^{-3}$  | $4.43 \times 10^{-1}$  |
| (MA) <sub>2</sub> ·(SFA) <sub>2</sub>      |  | $6.52 \times 10^{-18}$            | $2.45 \times 10^{-17}$ | $1.15 \times 10^{-16}$ | $7.09 \times 10^{-16}$ |
| MSA·MA·SFA                                 |  | $3.46 \times 10^{-10}$            | $6.44 \times 10^{-9}$  | $1.90 \times 10^{-7}$  | $9.96 \times 10^{-6}$  |
| MSA·(MA) <sub>2</sub> ·SFA                 |  | $3.45 \times 10^{-13}$            | $3.86 \times 10^{-12}$ | $6.36 \times 10^{-11}$ | $1.69 \times 10^{-9}$  |
| Collision with MA monomer: $C =$           |  |                                   |                        |                        |                        |
| [MA]                                       |  |                                   |                        |                        |                        |
| MSA·SFA                                    |  | $6.85 \times 10^{-13}$            | $5.04 \times 10^{-12}$ | $5.09 \times 10^{-11}$ | $7.69 \times 10^{-10}$ |
| (MSA) <sub>2</sub>                         |  | $4.58 \times 10^{-11}$            | $4.73 \times 10^{-10}$ | $7.08 \times 10^{-9}$  | $1.69 \times 10^{-7}$  |
| (SFA) <sub>2</sub>                         |  | $3.83 \times 10^{-13}$            | $2.75 \times 10^{-12}$ | $2.71 \times 10^{-11}$ | $3.97 \times 10^{-10}$ |
| (MSA) <sub>2</sub> ·MA                     |  | $1.91 \times 10^{-8}$             | $3.62 \times 10^{-7}$  | $1.09 \times 10^{-5}$  | $5.84 \times 10^{-4}$  |
| MA·(SFA) <sub>2</sub>                      |  | $1.12 \times 10^{-4}$             | $3.69 \times 10^{-3}$  | $2.10 \times 10^{-1}$  | $2.37 \times 10^1$     |
| (MSA) <sub>2</sub> ·SFA                    |  | $1.16 \times 10^{-17}$            | $5.02 \times 10^{-17}$ | $2.75 \times 10^{-16}$ | $2.01 \times 10^{-15}$ |
| MSA·(SFA) <sub>2</sub>                     |  | $3.41 \times 10^{-15}$            | $2.03 \times 10^{-14}$ | $1.61 \times 10^{-13}$ | $1.82 \times 10^{-12}$ |
| (MSA) <sub>3</sub>                         |  | $2.76 \times 10^{-15}$            | $1.76 \times 10^{-14}$ | $1.50 \times 10^{-13}$ | $1.87 \times 10^{-12}$ |
| (SFA) <sub>3</sub>                         |  | $2.38 \times 10^{-19}$            | $6.23 \times 10^{-19}$ | $1.92 \times 10^{-18}$ | $7.28 \times 10^{-18}$ |
| (MSA) <sub>3</sub> ·MA                     |  | $1.10 \times 10^{-10}$            | $1.35 \times 10^{-9}$  | $2.49 \times 10^{-8}$  | $7.59 \times 10^{-7}$  |
| (MSA) <sub>3</sub> ·(MA) <sub>2</sub>      |  | $4.69 \times 10^{-8}$             | $8.68 \times 10^{-7}$  | $2.55 \times 10^{-5}$  | $1.34 \times 10^{-3}$  |
| MA·(SFA) <sub>3</sub>                      |  | $3.88 \times 10^{-13}$            | $4.63 \times 10^{-12}$ | $8.16 \times 10^{-11}$ | $2.36 \times 10^{-9}$  |
| (MA) <sub>2</sub> ·(SFA) <sub>3</sub>      |  | $5.06 \times 10^{-8}$             | $9.16 \times 10^{-7}$  | $2.60 \times 10^{-5}$  | $1.28 \times 10^{-3}$  |
| MSA·MA·SFA                                 |  | $1.85 \times 10^{-8}$             | $3.44 \times 10^{-7}$  | $1.01 \times 10^{-5}$  | $5.32 \times 10^{-4}$  |
| (MSA) <sub>2</sub> ·MA·SFA                 |  | $1.12 \times 10^{-15}$            | $5.80 \times 10^{-15}$ | $3.91 \times 10^{-14}$ | $3.67 \times 10^{-13}$ |
| (MSA) <sub>2</sub> ·(MA) <sub>2</sub> ·SFA |  | $1.38 \times 10^{-9}$             | $2.52 \times 10^{-8}$  | $7.34 \times 10^{-7}$  | $3.81 \times 10^{-5}$  |
| MSA·MA·(SFA) <sub>2</sub>                  |  | $4.49 \times 10^{-12}$            | $5.40 \times 10^{-11}$ | $9.67 \times 10^{-10}$ | $2.85 \times 10^{-8}$  |
| MSA·(MA) <sub>2</sub> ·(SFA) <sub>2</sub>  |  | $7.17 \times 10^{-8}$             | $1.33 \times 10^{-6}$  | $3.85 \times 10^{-5}$  | $1.95 \times 10^{-3}$  |
| Collision with SFA monomer: $C =$          |  |                                   |                        |                        |                        |
| [SFA]                                      |  |                                   |                        |                        |                        |
| MSA·MA                                     |  | $9.60 \times 10^{-15}$            | $6.58 \times 10^{-14}$ | $6.13 \times 10^{-13}$ | $8.38 \times 10^{-12}$ |
| MSA·SFA                                    |  | $1.21 \times 10^{-14}$            | $8.89 \times 10^{-14}$ | $8.98 \times 10^{-13}$ | $1.36 \times 10^{-11}$ |



| Clusters                              | $(\beta \cdot C / \Sigma \gamma)$ |                        |                        |                        |
|---------------------------------------|-----------------------------------|------------------------|------------------------|------------------------|
|                                       | 298.15 K                          | 278.15 K               | 258.15 K               | 238.15 K               |
| MA·SFA                                | $1.01 \times 10^{-15}$            | $5.61 \times 10^{-15}$ | $4.13 \times 10^{-14}$ | $4.30 \times 10^{-13}$ |
| (MSA) <sub>2</sub>                    | $8.07 \times 10^{-13}$            | $8.34 \times 10^{-12}$ | $1.25 \times 10^{-10}$ | $2.98 \times 10^{-9}$  |
| (SFA) <sub>2</sub>                    | $6.75 \times 10^{-15}$            | $4.84 \times 10^{-14}$ | $4.78 \times 10^{-13}$ | $6.99 \times 10^{-12}$ |
| (MSA) <sub>2</sub> ·MA                | $3.28 \times 10^{-10}$            | $6.21 \times 10^{-9}$  | $1.87 \times 10^{-7}$  | $1.00 \times 10^{-5}$  |
| (MSA) <sub>2</sub> ·(MA) <sub>2</sub> | $5.98 \times 10^{-10}$            | $9.35 \times 10^{-9}$  | $2.27 \times 10^{-7}$  | $9.55 \times 10^{-6}$  |
| MA·(SFA) <sub>2</sub>                 | $1.92 \times 10^{-6}$             | $6.33 \times 10^{-5}$  | $3.60 \times 10^{-3}$  | $4.05 \times 10^{-1}$  |
| (MA) <sub>2</sub> ·(SFA) <sub>2</sub> | $6.00 \times 10^{-18}$            | $2.26 \times 10^{-17}$ | $1.06 \times 10^{-16}$ | $6.53 \times 10^{-16}$ |
| MSA·MA·SFA                            | $3.17 \times 10^{-10}$            | $5.90 \times 10^{-9}$  | $1.74 \times 10^{-7}$  | $9.12 \times 10^{-6}$  |
| MSA·(MA) <sub>2</sub> ·SFA            | $3.18 \times 10^{-13}$            | $3.55 \times 10^{-12}$ | $5.85 \times 10^{-11}$ | $1.56 \times 10^{-9}$  |

357

358 **Table S13** The formation rate  $J$  of MSA at the conditions of  $T = 238.15$  K,  $[\text{MSA}] = 10^6$ - $10^8$  molecules $\cdot\text{cm}^{-3}$ ,  $[\text{MA}] = 10^7$ - $10^{11}$  molecules $\cdot\text{cm}^{-3}$ , and  $[\text{SFA}] = 0, 10^8$ - $10^{12}$   
359 molecules $\cdot\text{cm}^{-3}$ . MSA, MA and SFA represent methanesulfonic acid, methylamine and sulfamic acid, respectively

| [MSA]          | [MA]                     | [SFA] = 0             | [SFA] = $10^4$        | [SFA] = $10^5$        | [SFA] = $10^6$        | [SFA] = $10^7$        | [SFA] = $10^8$        |
|----------------|--------------------------|-----------------------|-----------------------|-----------------------|-----------------------|-----------------------|-----------------------|
| [MSA] = $10^5$ | [MA] = $2.5 \times 10^7$ | $3.54 \times 10^{-9}$ | $4.80 \times 10^{-9}$ | $1.62 \times 10^{-8}$ | $1.30 \times 10^{-7}$ | $1.22 \times 10^{-6}$ | $8.69 \times 10^{-6}$ |
| [MSA] = $10^5$ | [MA] = $2.5 \times 10^8$ | $4.27 \times 10^{-7}$ | $5.34 \times 10^{-7}$ | $1.49 \times 10^{-6}$ | $1.10 \times 10^{-5}$ | $1.02 \times 10^{-4}$ | $7.26 \times 10^{-4}$ |
| [MSA] = $10^5$ | [MA] = $2.5 \times 10^9$ | $3.47 \times 10^{-6}$ | $4.21 \times 10^{-6}$ | $1.08 \times 10^{-5}$ | $7.60 \times 10^{-5}$ | $6.78 \times 10^{-4}$ | $5.23 \times 10^{-3}$ |
| [MSA] = $10^6$ | [MA] = $2.5 \times 10^7$ | $3.48 \times 10^{-5}$ | $3.61 \times 10^{-5}$ | $4.71 \times 10^{-5}$ | $1.58 \times 10^{-4}$ | $1.22 \times 10^{-3}$ | $8.64 \times 10^{-3}$ |
| [MSA] = $10^6$ | [MA] = $2.5 \times 10^8$ | $4.19 \times 10^{-3}$ | $4.29 \times 10^{-3}$ | $5.22 \times 10^{-3}$ | $1.45 \times 10^{-2}$ | $1.04 \times 10^{-1}$ | $7.20 \times 10^{-1}$ |
| [MSA] = $10^6$ | [MA] = $2.5 \times 10^9$ | $3.40 \times 10^{-2}$ | $3.47 \times 10^{-2}$ | $4.11 \times 10^{-2}$ | $1.04 \times 10^{-1}$ | $6.90 \times 10^{-1}$ | $5.14 \times 10^0$    |
| [MSA] = $10^7$ | [MA] = $2.5 \times 10^7$ | $3.01 \times 10^{-1}$ | $3.02 \times 10^{-1}$ | $3.11 \times 10^{-1}$ | $3.97 \times 10^{-1}$ | $1.24 \times 10^0$    | $8.08 \times 10^0$    |
| [MSA] = $10^7$ | [MA] = $2.5 \times 10^8$ | $3.47 \times 10^1$    | $3.48 \times 10^1$    | $3.55 \times 10^1$    | $4.28 \times 10^1$    | $1.14 \times 10^2$    | $6.53 \times 10^2$    |
| [MSA] = $10^7$ | [MA] = $2.5 \times 10^9$ | $2.72 \times 10^2$    | $2.73 \times 10^2$    | $2.78 \times 10^2$    | $3.26 \times 10^2$    | $7.74 \times 10^2$    | $4.31 \times 10^3$    |
| [MSA] = $10^8$ | [MA] = $2.5 \times 10^7$ | $1.14 \times 10^3$    | $1.14 \times 10^3$    | $1.14 \times 10^3$    | $1.17 \times 10^3$    | $1.44 \times 10^3$    | $4.98 \times 10^3$    |
| [MSA] = $10^8$ | [MA] = $2.5 \times 10^8$ | $9.01 \times 10^4$    | $9.01 \times 10^4$    | $9.02 \times 10^4$    | $9.19 \times 10^4$    | $1.08 \times 10^5$    | $2.64 \times 10^5$    |
| [MSA] = $10^8$ | [MA] = $2.5 \times 10^9$ | $5.34 \times 10^5$    | $5.34 \times 10^5$    | $5.35 \times 10^5$    | $5.42 \times 10^5$    | $6.12 \times 10^5$    | $1.23 \times 10^6$    |
| [MSA] = $10^9$ | [MA] = $2.5 \times 10^7$ | $6.99 \times 10^5$    | $6.99 \times 10^5$    | $7.00 \times 10^5$    | $7.02 \times 10^5$    | $7.30 \times 10^5$    | $9.89 \times 10^5$    |
| [MSA] = $10^9$ | [MA] = $2.5 \times 10^8$ | $1.66 \times 10^7$    | $1.66 \times 10^7$    | $1.66 \times 10^7$    | $1.67 \times 10^7$    | $1.69 \times 10^7$    | $1.97 \times 10^7$    |
| [MSA] = $10^9$ | [MA] = $2.5 \times 10^9$ | $9.54 \times 10^7$    | $9.54 \times 10^7$    | $9.54 \times 10^7$    | $9.55 \times 10^7$    | $9.65 \times 10^7$    | $1.06 \times 10^8$    |

360

361 **Table S14** The formation rate  $J$  of MSA at the conditions of  $T = 258.15$  K,  $[\text{MSA}] = 10^6$ - $10^8$  molecules $\cdot\text{cm}^{-3}$ ,  $[\text{MA}] = 10^7$ - $10^{11}$  molecules $\cdot\text{cm}^{-3}$ , and  $[\text{SFA}] = 0, 10^8$ - $10^{12}$   
362 molecules $\cdot\text{cm}^{-3}$ . MSA, MA and SFA represent methanesulfonic acid, methylamine and sulfamic acid, respectively

| [MSA]          | [MA]                     | [SFA] = 0              | [SFA] = $10^4$         | [SFA] = $10^5$         | [SFA] = $10^6$         | [SFA] = $10^7$        | [SFA] = $10^8$        |
|----------------|--------------------------|------------------------|------------------------|------------------------|------------------------|-----------------------|-----------------------|
| [MSA] = $10^5$ | [MA] = $2.5 \times 10^7$ | $2.63 \times 10^{-12}$ | $5.59 \times 10^{-12}$ | $3.22 \times 10^{-11}$ | $2.98 \times 10^{-10}$ | $2.96 \times 10^{-9}$ | $2.43 \times 10^{-8}$ |
| [MSA] = $10^5$ | [MA] = $2.5 \times 10^8$ | $9.62 \times 10^{-10}$ | $1.87 \times 10^{-9}$  | $1.00 \times 10^{-8}$  | $9.19 \times 10^{-8}$  | $9.18 \times 10^{-7}$ | $7.97 \times 10^{-6}$ |
| [MSA] = $10^5$ | [MA] = $2.5 \times 10^9$ | $1.02 \times 10^{-7}$  | $1.47 \times 10^{-7}$  | $5.60 \times 10^{-7}$  | $4.68 \times 10^{-6}$  | $4.48 \times 10^{-5}$ | $3.31 \times 10^{-4}$ |
| [MSA] = $10^6$ | [MA] = $2.5 \times 10^7$ | $2.61 \times 10^{-8}$  | $2.90 \times 10^{-8}$  | $5.52 \times 10^{-8}$  | $3.17 \times 10^{-7}$  | $2.93 \times 10^{-6}$ | $2.40 \times 10^{-5}$ |
| [MSA] = $10^6$ | [MA] = $2.5 \times 10^8$ | $9.54 \times 10^{-6}$  | $1.04 \times 10^{-5}$  | $1.84 \times 10^{-5}$  | $9.88 \times 10^{-5}$  | $9.10 \times 10^{-4}$ | $7.86 \times 10^{-3}$ |
| [MSA] = $10^6$ | [MA] = $2.5 \times 10^9$ | $1.00 \times 10^{-3}$  | $1.05 \times 10^{-3}$  | $1.45 \times 10^{-3}$  | $5.49 \times 10^{-3}$  | $4.48 \times 10^{-2}$ | $3.28 \times 10^{-1}$ |
| [MSA] = $10^7$ | [MA] = $2.5 \times 10^7$ | $2.44 \times 10^{-4}$  | $2.47 \times 10^{-4}$  | $2.69 \times 10^{-4}$  | $4.93 \times 10^{-4}$  | $2.73 \times 10^{-3}$ | $2.12 \times 10^{-2}$ |
| [MSA] = $10^7$ | [MA] = $2.5 \times 10^8$ | $8.75 \times 10^{-2}$  | $8.83 \times 10^{-2}$  | $9.50 \times 10^{-2}$  | $1.63 \times 10^{-1}$  | $8.47 \times 10^{-1}$ | $6.90 \times 10^0$    |
| [MSA] = $10^7$ | [MA] = $2.5 \times 10^9$ | $8.89 \times 10^0$     | $8.92 \times 10^0$     | $9.26 \times 10^0$     | $1.26 \times 10^1$     | $4.53 \times 10^1$    | $2.94 \times 10^2$    |
| [MSA] = $10^8$ | [MA] = $2.5 \times 10^7$ | $1.52 \times 10^0$     | $1.52 \times 10^0$     | $1.53 \times 10^0$     | $1.61 \times 10^0$     | $2.41 \times 10^0$    | $9.90 \times 10^0$    |
| [MSA] = $10^8$ | [MA] = $2.5 \times 10^8$ | $4.80 \times 10^2$     | $4.80 \times 10^2$     | $4.83 \times 10^2$     | $5.06 \times 10^2$     | $7.41 \times 10^2$    | $3.17 \times 10^3$    |
| [MSA] = $10^8$ | [MA] = $2.5 \times 10^9$ | $3.46 \times 10^4$     | $3.46 \times 10^4$     | $3.47 \times 10^4$     | $3.57 \times 10^4$     | $4.52 \times 10^4$    | $1.35 \times 10^5$    |
| [MSA] = $10^9$ | [MA] = $2.5 \times 10^7$ | $4.61 \times 10^3$     | $4.61 \times 10^3$     | $4.61 \times 10^3$     | $4.63 \times 10^3$     | $4.83 \times 10^3$    | $6.79 \times 10^3$    |
| [MSA] = $10^9$ | [MA] = $2.5 \times 10^8$ | $6.06 \times 10^5$     | $6.06 \times 10^5$     | $6.06 \times 10^5$     | $6.09 \times 10^5$     | $6.32 \times 10^5$    | $8.51 \times 10^5$    |
| [MSA] = $10^9$ | [MA] = $2.5 \times 10^9$ | $1.32 \times 10^7$     | $1.32 \times 10^7$     | $1.32 \times 10^7$     | $1.33 \times 10^7$     | $1.36 \times 10^7$    | $1.69 \times 10^7$    |

363

364 **Table S15** The formation rate  $J$  of MSA at the conditions of  $T = 278.15$  K,  $[\text{MSA}] = 10^6$ - $10^8$  molecules $\cdot\text{cm}^{-3}$ ,  $[\text{MA}] = 10^7$ - $10^{11}$  molecules $\cdot\text{cm}^{-3}$ , and  $[\text{SFA}] = 0, 10^8$ - $10^{12}$   
 365 molecules $\cdot\text{cm}^{-3}$ . MSA, MA and SFA represent methanesulfonic acid, methylamine and sulfamic acid, respectively

| [MSA]          | [MA]                     | [SFA] = 0              | [SFA] = $10^4$         | [SFA] = $10^5$         | [SFA] = $10^6$         | [SFA] = $10^7$         | [SFA] = $10^8$         |
|----------------|--------------------------|------------------------|------------------------|------------------------|------------------------|------------------------|------------------------|
| [MSA] = $10^5$ | [MA] = $2.5 \times 10^7$ | $1.68 \times 10^{-17}$ | $3.26 \times 10^{-17}$ | $1.75 \times 10^{-16}$ | $1.60 \times 10^{-15}$ | $1.59 \times 10^{-14}$ | $1.65 \times 10^{-13}$ |
| [MSA] = $10^5$ | [MA] = $2.5 \times 10^8$ | $1.67 \times 10^{-14}$ | $3.21 \times 10^{-14}$ | $1.71 \times 10^{-13}$ | $1.56 \times 10^{-12}$ | $1.54 \times 10^{-11}$ | $1.56 \times 10^{-10}$ |
| [MSA] = $10^5$ | [MA] = $2.5 \times 10^9$ | $1.53 \times 10^{-11}$ | $2.74 \times 10^{-11}$ | $1.36 \times 10^{-10}$ | $1.22 \times 10^{-9}$  | $1.21 \times 10^{-8}$  | $1.22 \times 10^{-7}$  |
| [MSA] = $10^6$ | [MA] = $2.5 \times 10^7$ | $1.68 \times 10^{-13}$ | $1.84 \times 10^{-13}$ | $3.26 \times 10^{-13}$ | $1.75 \times 10^{-12}$ | $1.60 \times 10^{-11}$ | $1.65 \times 10^{-10}$ |
| [MSA] = $10^6$ | [MA] = $2.5 \times 10^8$ | $1.67 \times 10^{-10}$ | $1.82 \times 10^{-10}$ | $3.21 \times 10^{-10}$ | $1.71 \times 10^{-9}$  | $1.56 \times 10^{-8}$  | $1.57 \times 10^{-7}$  |
| [MSA] = $10^6$ | [MA] = $2.5 \times 10^9$ | $1.53 \times 10^{-7}$  | $1.65 \times 10^{-7}$  | $2.74 \times 10^{-7}$  | $1.36 \times 10^{-6}$  | $1.22 \times 10^{-5}$  | $1.22 \times 10^{-4}$  |
| [MSA] = $10^7$ | [MA] = $2.5 \times 10^7$ | $1.68 \times 10^{-9}$  | $1.70 \times 10^{-9}$  | $1.84 \times 10^{-9}$  | $3.25 \times 10^{-9}$  | $1.74 \times 10^{-8}$  | $1.67 \times 10^{-7}$  |
| [MSA] = $10^7$ | [MA] = $2.5 \times 10^8$ | $1.67 \times 10^{-6}$  | $1.69 \times 10^{-6}$  | $1.82 \times 10^{-6}$  | $3.19 \times 10^{-6}$  | $1.69 \times 10^{-5}$  | $1.57 \times 10^{-4}$  |
| [MSA] = $10^7$ | [MA] = $2.5 \times 10^9$ | $1.53 \times 10^{-3}$  | $1.54 \times 10^{-3}$  | $1.65 \times 10^{-3}$  | $2.72 \times 10^{-3}$  | $1.34 \times 10^{-2}$  | $1.22 \times 10^{-1}$  |
| [MSA] = $10^8$ | [MA] = $2.5 \times 10^7$ | $1.69 \times 10^{-5}$  | $1.69 \times 10^{-5}$  | $1.70 \times 10^{-5}$  | $1.83 \times 10^{-5}$  | $3.12 \times 10^{-5}$  | $1.72 \times 10^{-4}$  |
| [MSA] = $10^8$ | [MA] = $2.5 \times 10^8$ | $1.68 \times 10^{-2}$  | $1.68 \times 10^{-2}$  | $1.69 \times 10^{-2}$  | $1.82 \times 10^{-2}$  | $3.07 \times 10^{-2}$  | $1.62 \times 10^{-1}$  |
| [MSA] = $10^8$ | [MA] = $2.5 \times 10^9$ | $1.54 \times 10^1$     | $1.54 \times 10^1$     | $1.55 \times 10^1$     | $1.64 \times 10^1$     | $2.59 \times 10^1$     | $1.22 \times 10^2$     |
| [MSA] = $10^9$ | [MA] = $2.5 \times 10^7$ | $1.75 \times 10^{-1}$  | $1.75 \times 10^{-1}$  | $1.75 \times 10^{-1}$  | $1.76 \times 10^{-1}$  | $1.84 \times 10^{-1}$  | $2.72 \times 10^{-1}$  |
| [MSA] = $10^9$ | [MA] = $2.5 \times 10^8$ | $1.78 \times 10^2$     | $1.78 \times 10^2$     | $1.78 \times 10^2$     | $1.79 \times 10^2$     | $1.86 \times 10^2$     | $2.68 \times 10^2$     |
| [MSA] = $10^9$ | [MA] = $2.5 \times 10^9$ | $1.30 \times 10^5$     | $1.30 \times 10^5$     | $1.30 \times 10^5$     | $1.31 \times 10^5$     | $1.34 \times 10^5$     | $1.73 \times 10^5$     |

366

367  
368

**Table S16** The formation rate  $J$  of MSA at the conditions of  $T = 298.15$  K,  $[\text{MSA}] = 10^6$ - $10^8$  molecules $\cdot\text{cm}^{-3}$ ,  $[\text{MA}] = 10^7$ - $10^{11}$  molecules $\cdot\text{cm}^{-3}$ , and  $[\text{SFA}] = 0, 10^8$ - $10^{12}$  molecules $\cdot\text{cm}^{-3}$ . MSA, MA and SFA represent methanesulfonic acid, methylamine and sulfamic acid, respectively

| [MSA]          | [MA]                     | [SFA] = 0              | [SFA] = $10^4$         | [SFA] = $10^5$         | [SFA] = $10^6$         | [SFA] = $10^7$         | [SFA] = $10^8$         |
|----------------|--------------------------|------------------------|------------------------|------------------------|------------------------|------------------------|------------------------|
| [MSA] = $10^5$ | [MA] = $2.5 \times 10^7$ | $2.62 \times 10^{-23}$ | $4.79 \times 10^{-23}$ | $2.43 \times 10^{-22}$ | $2.20 \times 10^{-21}$ | $2.21 \times 10^{-20}$ | $2.58 \times 10^{-19}$ |
| [MSA] = $10^5$ | [MA] = $2.5 \times 10^8$ | $2.62 \times 10^{-20}$ | $4.79 \times 10^{-20}$ | $2.43 \times 10^{-19}$ | $2.20 \times 10^{-18}$ | $2.20 \times 10^{-17}$ | $2.52 \times 10^{-16}$ |
| [MSA] = $10^5$ | [MA] = $2.5 \times 10^9$ | $2.68 \times 10^{-17}$ | $4.85 \times 10^{-17}$ | $2.44 \times 10^{-16}$ | $2.20 \times 10^{-15}$ | $2.18 \times 10^{-14}$ | $2.31 \times 10^{-13}$ |
| [MSA] = $10^6$ | [MA] = $2.5 \times 10^7$ | $2.62 \times 10^{-19}$ | $2.83 \times 10^{-19}$ | $4.79 \times 10^{-19}$ | $2.44 \times 10^{-18}$ | $2.23 \times 10^{-17}$ | $2.58 \times 10^{-16}$ |
| [MSA] = $10^6$ | [MA] = $2.5 \times 10^8$ | $2.62 \times 10^{-16}$ | $2.84 \times 10^{-16}$ | $4.79 \times 10^{-16}$ | $2.44 \times 10^{-15}$ | $2.23 \times 10^{-14}$ | $2.52 \times 10^{-13}$ |
| [MSA] = $10^6$ | [MA] = $2.5 \times 10^9$ | $2.68 \times 10^{-13}$ | $2.90 \times 10^{-13}$ | $4.85 \times 10^{-13}$ | $2.44 \times 10^{-12}$ | $2.21 \times 10^{-11}$ | $2.31 \times 10^{-10}$ |
| [MSA] = $10^7$ | [MA] = $2.5 \times 10^7$ | $2.62 \times 10^{-15}$ | $2.64 \times 10^{-15}$ | $2.83 \times 10^{-15}$ | $4.79 \times 10^{-15}$ | $2.46 \times 10^{-14}$ | $2.58 \times 10^{-13}$ |
| [MSA] = $10^7$ | [MA] = $2.5 \times 10^8$ | $2.62 \times 10^{-12}$ | $2.64 \times 10^{-12}$ | $2.84 \times 10^{-12}$ | $4.79 \times 10^{-12}$ | $2.46 \times 10^{-11}$ | $2.52 \times 10^{-10}$ |
| [MSA] = $10^7$ | [MA] = $2.5 \times 10^9$ | $2.68 \times 10^{-9}$  | $2.71 \times 10^{-9}$  | $2.90 \times 10^{-9}$  | $4.85 \times 10^{-9}$  | $2.45 \times 10^{-8}$  | $2.32 \times 10^{-7}$  |
| [MSA] = $10^8$ | [MA] = $2.5 \times 10^7$ | $2.62 \times 10^{-11}$ | $2.62 \times 10^{-11}$ | $2.64 \times 10^{-11}$ | $2.84 \times 10^{-11}$ | $4.80 \times 10^{-11}$ | $2.71 \times 10^{-10}$ |
| [MSA] = $10^8$ | [MA] = $2.5 \times 10^8$ | $2.63 \times 10^{-8}$  | $2.63 \times 10^{-8}$  | $2.65 \times 10^{-8}$  | $2.84 \times 10^{-8}$  | $4.81 \times 10^{-8}$  | $2.66 \times 10^{-7}$  |
| [MSA] = $10^8$ | [MA] = $2.5 \times 10^9$ | $2.69 \times 10^{-5}$  | $2.69 \times 10^{-5}$  | $2.71 \times 10^{-5}$  | $2.90 \times 10^{-5}$  | $4.85 \times 10^{-5}$  | $2.52 \times 10^{-4}$  |
| [MSA] = $10^9$ | [MA] = $2.5 \times 10^7$ | $2.65 \times 10^{-7}$  | $2.65 \times 10^{-7}$  | $2.65 \times 10^{-7}$  | $2.67 \times 10^{-7}$  | $2.86 \times 10^{-7}$  | $4.84 \times 10^{-7}$  |
| [MSA] = $10^9$ | [MA] = $2.5 \times 10^8$ | $2.66 \times 10^{-4}$  | $2.66 \times 10^{-4}$  | $2.66 \times 10^{-4}$  | $2.68 \times 10^{-4}$  | $2.87 \times 10^{-4}$  | $4.83 \times 10^{-4}$  |
| [MSA] = $10^9$ | [MA] = $2.5 \times 10^9$ | $2.73 \times 10^{-1}$  | $2.73 \times 10^{-1}$  | $2.73 \times 10^{-1}$  | $2.75 \times 10^{-1}$  | $2.94 \times 10^{-1}$  | $4.85 \times 10^{-1}$  |

369

**Table S17** Cartesian coordinates of all molecules and clusters in the studied system**MSA:**

| Atoms | X           | Y           | Z           |
|-------|-------------|-------------|-------------|
| S     | 0.08625500  | 0.13875900  | 0.06729200  |
| O     | 0.20786800  | 1.40372500  | -0.58037200 |
| O     | 0.60516400  | -0.08599700 | 1.38677800  |
| O     | 0.76916500  | -0.95690500 | -0.88879000 |
| H     | 1.34875900  | -1.50079600 | -0.34066100 |
| C     | -1.60359500 | -0.37243200 | -0.00520600 |
| H     | -2.16873100 | 0.34875600  | 0.57873100  |
| H     | -1.91343000 | -0.35301000 | -1.04542600 |
| H     | -1.68268700 | -1.36709600 | 0.42100400  |

**MA:**

| Atoms | X           | Y           | Z           |
|-------|-------------|-------------|-------------|
| H     | -0.44173500 | -1.10950800 | 0.81057800  |
| N     | 0.04994100  | -0.75699600 | 0.00000000  |
| C     | 0.04994100  | 0.70512600  | 0.00000000  |
| H     | -0.44173500 | -1.10950800 | -0.81057800 |
| H     | 0.58870300  | 1.06082400  | 0.87680200  |
| H     | -0.94317000 | 1.16558700  | 0.00000000  |
| H     | 0.58870300  | 1.06082400  | -0.87680200 |

**SFA:**

| Atoms | X           | Y           | Z           |
|-------|-------------|-------------|-------------|
| S     | -0.04565300 | 0.04592600  | -0.14447900 |
| O     | -1.08453900 | -0.21880200 | 1.02805600  |
| O     | -0.12674900 | -1.02547100 | -1.08448500 |
| O     | -0.25134700 | 1.40779700  | -0.49883900 |
| N     | 1.39184100  | -0.14902500 | 0.64833400  |
| H     | -1.09734200 | -1.16493200 | 1.21837500  |
| H     | 1.73213500  | 0.74411300  | 0.98246800  |
| H     | 2.05384700  | -0.57901100 | 0.01463600  |

**(MSA)<sub>1</sub>·(MA)<sub>1</sub>:**

| Atoms | X          | Y           | Z           |
|-------|------------|-------------|-------------|
| N     | 2.26374800 | -0.78481100 | -0.01141900 |
| H     | 2.96027900 | -1.43769100 | -0.34749300 |
| H     | 1.99700800 | -1.05454400 | 0.93010200  |
| C     | 2.77584800 | 0.59667400  | -0.00964200 |
| H     | 3.65756200 | 0.71837100  | 0.61835700  |
| H     | 3.01894400 | 0.88490500  | -1.02947200 |
| H     | 1.98571500 | 1.24970800  | 0.35497300  |

| Atoms | X           | Y           | Z           |
|-------|-------------|-------------|-------------|
| S     | -0.86242000 | 0.15986100  | 0.05001700  |
| O     | -1.17602700 | 1.51047400  | -0.31989200 |
| O     | -0.19896900 | -0.06953900 | 1.31801900  |
| O     | -0.02782800 | -0.52825500 | -1.06719700 |
| H     | 0.95971700  | -0.72449400 | -0.68816500 |
| C     | -2.35647500 | -0.78577200 | 0.00743500  |
| H     | -3.02354100 | -0.35409900 | 0.74801700  |
| H     | -2.77867400 | -0.69647000 | -0.98871700 |
| H     | -2.11818100 | -1.81663800 | 0.24786100  |

378

379 (MSA)<sub>1</sub>·(SFA)<sub>1</sub>:

| Atoms | X           | Y           | Z           |
|-------|-------------|-------------|-------------|
| S     | -1.77748800 | 0.04604700  | -0.07120300 |
| O     | -1.22918800 | -0.85281400 | -1.06384500 |
| O     | -1.32031800 | 1.41045800  | -0.10465000 |
| O     | -1.56889500 | -0.56176700 | 1.35823500  |
| H     | -0.59123500 | -0.64199300 | 1.48903100  |
| C     | -3.53295000 | -0.00784900 | -0.14465900 |
| H     | -3.81229100 | 0.39613900  | -1.11339900 |
| H     | -3.84182900 | -1.04355300 | -0.04700300 |
| H     | -3.91905800 | 0.60698000  | 0.66216100  |
| S     | 1.97318100  | -0.07149400 | 0.09330200  |
| O     | 1.51298400  | -0.71650300 | -1.26885100 |
| O     | 1.07624500  | -0.54448900 | 1.12270100  |
| O     | 3.37096500  | -0.29041400 | 0.18255700  |
| N     | 1.71047900  | 1.53251800  | -0.02108100 |
| H     | 0.53725400  | -0.83045300 | -1.27027300 |
| H     | 2.26719600  | 1.93923800  | -0.76145500 |
| H     | 0.71887500  | 1.74449700  | -0.10629100 |

380

381 (MSA)<sub>1</sub>·(SFA)<sub>1</sub>·(MA)<sub>1</sub>:

| Atoms | X           | Y           | Z           |
|-------|-------------|-------------|-------------|
| N     | -0.21536000 | 2.31867300  | -0.59293600 |
| H     | 0.02058800  | 2.92148800  | -1.37513900 |
| H     | 0.63521800  | 1.77768600  | -0.31819000 |
| C     | -0.68847200 | 3.08312900  | 0.58713000  |
| H     | 0.10158900  | 3.74723600  | 0.92315800  |
| H     | -1.57442300 | 3.64980800  | 0.31794400  |
| H     | -0.92541700 | 2.35573500  | 1.35670200  |
| S     | -1.77778500 | -0.56718400 | -0.05684400 |
| O     | -1.14332400 | 0.00216000  | 1.13500800  |
| O     | -0.94772100 | -1.63107500 | -0.66057800 |
| O     | -2.15682700 | 0.47273400  | -1.02387400 |

| Atoms | X           | Y           | Z           |
|-------|-------------|-------------|-------------|
| H     | -0.95555800 | 1.63525400  | -0.88860200 |
| C     | -3.27491900 | -1.36478700 | 0.44118100  |
| H     | -3.01906900 | -2.13700900 | 1.15989000  |
| H     | -3.91774700 | -0.61298700 | 0.88832500  |
| H     | -3.73215900 | -1.79269500 | -0.44552800 |
| S     | 2.15157100  | -0.31648400 | 0.02569900  |
| O     | 1.25256200  | -0.51816100 | -1.24299000 |
| O     | 3.46702300  | -0.76189600 | -0.28056700 |
| O     | 1.95313800  | 1.05735600  | 0.45141300  |
| N     | 1.53243100  | -1.24554200 | 1.21076000  |
| H     | 0.38218900  | -1.01765600 | -1.03629700 |
| H     | 0.57843800  | -0.95260000 | 1.42765100  |
| H     | 1.58780800  | -2.22649700 | 0.96647500  |

382

383 (MSA)<sub>1</sub>·(SFA)<sub>1</sub>·(MA)<sub>2</sub>:

| Atoms | X           | Y           | Z           |
|-------|-------------|-------------|-------------|
| N     | 1.27888700  | -2.30583600 | -0.66569200 |
| H     | 1.19878900  | -2.84808800 | -1.52088500 |
| H     | 0.38221900  | -2.42320700 | -0.14388800 |
| C     | 2.45985600  | -2.68742300 | 0.13748200  |
| H     | 2.39242400  | -3.73455500 | 0.41680600  |
| H     | 3.35719800  | -2.50652500 | -0.44665200 |
| H     | 2.46478500  | -2.05103100 | 1.01606600  |
| S     | 1.67356000  | 1.02413300  | 0.01852200  |
| O     | 1.45804300  | 0.11610300  | 1.15279500  |
| O     | 0.56880300  | 1.97192600  | -0.18837500 |
| O     | 2.07526200  | 0.29617600  | -1.19110300 |
| H     | 1.34965400  | -1.29969500 | -0.93475100 |
| C     | 3.06362200  | 2.04008900  | 0.45521600  |
| H     | 2.80659300  | 2.59203400  | 1.35410800  |
| H     | 3.91400400  | 1.38854900  | 0.63161200  |
| H     | 3.25896600  | 2.71502500  | -0.37253500 |
| S     | -1.69300900 | -1.13177300 | 0.08360500  |
| O     | -0.83990800 | -0.60911600 | -0.98542600 |
| O     | -3.11364900 | -0.98109400 | -0.18632400 |
| O     | -1.25860600 | -2.47045000 | 0.49979600  |
| N     | -1.43811000 | -0.06056900 | 1.35541300  |
| H     | -1.06401100 | 1.52094200  | -0.67766100 |
| H     | -0.43272600 | -0.00846700 | 1.53443800  |
| H     | -1.91718600 | -0.42981600 | 2.16922400  |
| H     | -2.16526000 | 2.12914900  | -1.76900800 |
| N     | -2.05847200 | 1.82271200  | -0.80639800 |
| C     | -2.35099600 | 2.89614100  | 0.16836300  |
| H     | -2.64657000 | 0.98908300  | -0.66086300 |



| Atoms | X           | Y          | Z          |
|-------|-------------|------------|------------|
| H     | -3.36232300 | 3.26467400 | 0.02649400 |
| H     | -1.62389900 | 3.68945800 | 0.02900700 |
| H     | -2.23206600 | 2.45934200 | 1.15392600 |

384

385 (MSA)<sub>1</sub>·(SFA)<sub>2</sub>:

| Atoms | X           | Y           | Z           |
|-------|-------------|-------------|-------------|
| S     | 1.84587300  | -1.37363300 | 0.01983300  |
| O     | 0.82780400  | -1.89814200 | -1.03564800 |
| O     | 1.14243600  | -0.89837700 | 1.18182500  |
| O     | 2.76540000  | -0.47344900 | -0.63927300 |
| H     | 2.40713200  | 1.16989400  | -0.35497800 |
| C     | 2.74137900  | -2.83499100 | 0.42853100  |
| H     | 2.04522000  | -3.53876600 | 0.87405100  |
| H     | 3.17390500  | -3.22702300 | -0.48694200 |
| H     | 3.51507000  | -2.54579500 | 1.13376800  |
| S     | 0.58551600  | 2.19630600  | -0.07855500 |
| O     | 0.18854100  | 3.52007200  | -0.40434800 |
| O     | 0.12606600  | 1.10580700  | -0.94150600 |
| O     | 2.13469200  | 2.07628400  | -0.06369300 |
| N     | 0.20880500  | 1.92428700  | 1.48472600  |
| H     | -1.33843000 | 0.70234600  | -1.15752700 |
| H     | 0.35035600  | 0.93806200  | 1.69885900  |
| H     | -0.76606600 | 2.16444000  | 1.63096500  |
| S     | -2.40116100 | -0.62812300 | 0.08025100  |
| O     | -1.62759200 | -1.83246500 | -0.13077300 |
| O     | -2.19564100 | 0.13966200  | 1.26700900  |
| O     | -2.26344000 | 0.28523600  | -1.17460800 |
| N     | -3.96036400 | -1.09565500 | 0.03257400  |
| H     | -0.10440200 | -1.84085300 | -0.68126200 |
| H     | -4.16069100 | -1.62025300 | -0.80979000 |
| H     | -4.57921800 | -0.30235900 | 0.14422500  |

386

387 (MSA)<sub>1</sub>·(SFA)<sub>2</sub>·(MA)<sub>1</sub>:

| Atoms | X           | Y           | Z           |
|-------|-------------|-------------|-------------|
| N     | 0.23257300  | -0.52840400 | 2.39574300  |
| H     | 1.21152400  | -0.66898100 | 2.63475800  |
| H     | 0.01112800  | -1.19521700 | 1.64303300  |
| C     | -0.68315600 | -0.66547000 | 3.55091100  |
| H     | -0.56883600 | -1.65389700 | 3.98483200  |
| H     | -0.44166900 | 0.09553900  | 4.28629000  |
| H     | -1.69386900 | -0.53083100 | 3.18288700  |
| S     | 0.76799600  | 2.15687300  | -0.09040900 |
| O     | -0.08450300 | 1.54985600  | -1.12777000 |

| Atoms | X           | Y           | Z           |
|-------|-------------|-------------|-------------|
| O     | 2.16321200  | 1.68497100  | -0.22405000 |
| O     | 0.23694800  | 1.99373900  | 1.26054900  |
| H     | 0.15178000  | 0.41426600  | 1.95761100  |
| C     | 0.82343100  | 3.89052700  | -0.41754800 |
| H     | 1.21592900  | 4.02777900  | -1.42013000 |
| H     | -0.18951000 | 4.27318700  | -0.33643400 |
| H     | 1.47308000  | 4.34549500  | 0.32359800  |
| S     | 1.86078300  | -1.72046800 | -0.44214200 |
| O     | 2.40579100  | -0.66505900 | 0.58670100  |
| O     | 2.88747200  | -2.67118800 | -0.69637700 |
| O     | 0.58972600  | -2.17404000 | 0.08847700  |
| N     | 1.52714600  | -0.92708700 | -1.82133800 |
| H     | 2.34303500  | 0.30560000  | 0.23554700  |
| H     | 0.82041200  | -0.19896500 | -1.70505000 |
| H     | 2.37196700  | -0.57737600 | -2.25581600 |
| S     | -2.64042200 | -0.48130300 | -0.40953800 |
| O     | -2.64252900 | 0.99415900  | -0.91427400 |
| O     | -1.91019200 | -0.55293300 | 0.83190200  |
| O     | -3.99234000 | -0.92709800 | -0.47422200 |
| N     | -1.69822000 | -1.23932300 | -1.52212700 |
| H     | -1.69787600 | 1.30089700  | -0.97474200 |
| H     | -2.26392500 | -1.68280700 | -2.23291600 |
| H     | -1.05770000 | -1.88221900 | -1.06367600 |

388

389

(MSA)<sub>1</sub>·(SFA)<sub>2</sub>·(MA)<sub>2</sub>:

| Atoms | X           | Y           | Z           |
|-------|-------------|-------------|-------------|
| N     | -0.09812500 | 2.46508100  | -0.25975000 |
| H     | 0.75026800  | 1.97240800  | -0.59721300 |
| H     | -0.08194000 | 2.40727000  | 0.76137900  |
| C     | -0.17601900 | 3.84842700  | -0.76224500 |
| H     | 0.69786300  | 4.40692900  | -0.44101100 |
| H     | -0.21194400 | 3.81786500  | -1.84669600 |
| H     | -1.07974800 | 4.31653600  | -0.38451800 |
| S     | -2.94281200 | 0.07123800  | -0.58150400 |
| O     | -2.97593100 | 0.19676500  | 0.87569200  |
| O     | -2.43886300 | -1.23509600 | -1.04062900 |
| O     | -2.29442200 | 1.20978400  | -1.24819800 |
| H     | -0.92456100 | 1.90058100  | -0.57714300 |
| C     | -4.63240300 | 0.11893400  | -1.12083500 |
| H     | -5.15574800 | -0.70815400 | -0.65108700 |
| H     | -5.05373600 | 1.06953400  | -0.80859200 |
| H     | -4.64481200 | 0.02406600  | -2.20216200 |
| S     | 0.14179900  | -0.09466600 | 1.86164800  |
| O     | 0.03944200  | -0.02252900 | 0.42313000  |

| Atoms | X           | Y           | Z           |
|-------|-------------|-------------|-------------|
| O     | 1.43440900  | -0.83702300 | 2.24680100  |
| O     | 0.03402800  | 1.16205100  | 2.55761800  |
| N     | -0.98083400 | -1.20394000 | 2.32499600  |
| H     | -0.93490100 | -1.84879500 | -0.76670500 |
| H     | -1.87033600 | -0.85974800 | 1.93137300  |
| H     | -1.03090500 | -1.24341100 | 3.33754300  |
| H     | 0.75755800  | -1.85328000 | -0.75254800 |
| N     | -0.08245200 | -2.43092900 | -0.56324400 |
| C     | -0.07889700 | -3.68128200 | -1.34437300 |
| H     | -0.10453600 | -2.59521800 | 0.44373000  |
| H     | 0.80447900  | -4.26306300 | -1.09930500 |
| H     | -0.06474700 | -3.42503900 | -2.39894300 |
| H     | -0.97843400 | -4.24690200 | -1.12114200 |
| S     | 2.90904900  | 0.08404400  | -0.70742400 |
| O     | 3.09377500  | 0.20145900  | 0.75536600  |
| O     | 2.33912400  | -1.18414500 | -1.13796700 |
| O     | 2.25554800  | 1.26313900  | -1.26809600 |
| N     | 4.48011100  | 0.02599900  | -1.25863600 |
| H     | 2.20359800  | -0.43995800 | 1.63006200  |
| H     | 4.45138400  | -0.03899700 | -2.27036400 |
| H     | 4.93875000  | 0.89232600  | -0.99875300 |

390

391 (MSA)<sub>1</sub>·(SFA)<sub>2</sub>·(MA)<sub>3</sub>:

| Atoms | X           | Y           | Z           |
|-------|-------------|-------------|-------------|
| N     | -0.77975000 | -0.58328900 | -1.95741600 |
| H     | -0.22778000 | -0.99069200 | -1.18931900 |
| H     | -0.80656700 | 0.44014900  | -1.80813700 |
| C     | -0.12581100 | -0.91739500 | -3.23735500 |
| H     | 0.89725200  | -0.55624500 | -3.19710800 |
| H     | -0.12671100 | -1.99565600 | -3.36473700 |
| H     | -0.66334000 | -0.44265500 | -4.05232300 |
| S     | -3.33828400 | -0.59555300 | 0.20086000  |
| O     | -2.38789700 | 0.52780300  | 0.12727600  |
| O     | -3.15719300 | -1.37216500 | 1.43438700  |
| O     | -3.32099200 | -1.40296700 | -1.01962200 |
| H     | -1.74243200 | -0.94447900 | -1.86074100 |
| C     | -4.96047200 | 0.11612100  | 0.30399000  |
| H     | -5.00187200 | 0.73274500  | 1.19665200  |
| H     | -5.12235200 | 0.71101400  | -0.58971500 |
| H     | -5.67714700 | -0.69742500 | 0.36301700  |
| S     | 0.23443800  | 2.32340000  | -0.40277100 |
| O     | 0.63758700  | 1.01609600  | 0.14519000  |
| O     | 1.34504600  | 3.28055600  | -0.38530400 |
| O     | -0.39655500 | 2.19120700  | -1.71119500 |

| Atoms | X           | Y           | Z           |
|-------|-------------|-------------|-------------|
| N     | -0.85646400 | 2.91624000  | 0.70383100  |
| H     | -1.48609400 | -1.06306000 | 1.88226900  |
| H     | -1.69454300 | 2.33782400  | 0.62379700  |
| H     | -1.07641000 | 3.87054900  | 0.43977900  |
| H     | 0.04627300  | -1.61072200 | 1.46686000  |
| N     | -0.47329400 | -0.82787500 | 1.87648300  |
| C     | 0.05872300  | -0.43881700 | 3.19631900  |
| H     | -0.34102400 | -0.05238700 | 1.20316700  |
| H     | 1.12973900  | -0.29450000 | 3.09752100  |
| H     | -0.14511700 | -1.22419300 | 3.91779700  |
| H     | -0.42343100 | 0.48320600  | 3.50705400  |
| S     | 2.19832200  | -1.77842300 | -0.10278300 |
| O     | 2.61940500  | -0.89787100 | -1.19287000 |
| O     | 2.44642600  | -1.25790700 | 1.23288000  |
| O     | 0.80749000  | -2.23920300 | -0.26601000 |
| N     | 3.21296800  | -3.09899900 | -0.24099500 |
| H     | 2.72218100  | 2.28235300  | -0.33429700 |
| H     | 2.95376600  | -3.77317500 | 0.47082500  |
| H     | 3.06751500  | -3.51710100 | -1.15352100 |
| H     | 4.29968400  | 1.67422700  | -0.44166600 |
| N     | 3.38372800  | 1.53147900  | -0.02800500 |
| C     | 3.43584100  | 1.54664000  | 1.45451400  |
| H     | 3.00642900  | 0.62788200  | -0.38432200 |
| H     | 3.87264800  | 2.48591600  | 1.78076700  |
| H     | 4.01002000  | 0.69555700  | 1.80247100  |
| H     | 2.41116600  | 1.46350300  | 1.79906200  |

392

393 (SFA)<sub>1</sub>·(MA)<sub>1</sub>:

| Atoms | X           | Y           | Z           |
|-------|-------------|-------------|-------------|
| H     | 0.90531600  | -0.78686000 | -0.69834300 |
| N     | 2.22367900  | -0.72567300 | -0.04736400 |
| C     | 2.62380200  | 0.69000000  | 0.01175900  |
| H     | 2.96005900  | -1.30434900 | -0.43091400 |
| H     | 1.80632200  | 1.25001300  | 0.45875800  |
| H     | 2.77623100  | 1.05743800  | -1.00033800 |
| H     | 3.53313900  | 0.84761800  | 0.59107500  |
| S     | -0.95621000 | -0.09556200 | 0.08123100  |
| O     | -0.27297500 | -0.19486100 | 1.34537000  |
| O     | -0.11638600 | -0.75074400 | -1.02985600 |
| O     | -2.30679000 | -0.54518400 | -0.03856600 |
| N     | -0.83071900 | 1.52080100  | -0.33668300 |
| H     | 2.00684800  | -1.06191100 | 0.88535600  |
| H     | -1.19511800 | 2.05747000  | 0.44388800  |
| H     | -1.41775700 | 1.69000200  | -1.14698700 |

394

395 (MSA)<sub>2</sub>:

| Atoms | X           | Y           | Z           |
|-------|-------------|-------------|-------------|
| S     | -2.01703200 | -0.12116800 | -0.07554800 |
| O     | -3.38279900 | -0.51870000 | -0.15695700 |
| O     | -1.08526100 | -0.58726700 | -1.08778600 |
| O     | -1.47968700 | -0.56725800 | 1.33259400  |
| H     | -0.49471800 | -0.63142600 | 1.32106200  |
| C     | -1.90839400 | 1.63907100  | -0.00788700 |
| H     | -2.29408700 | 2.01082200  | -0.95333000 |
| H     | -2.52434700 | 1.97225200  | 0.82154800  |
| H     | -0.86386000 | 1.91150700  | 0.12239100  |
| S     | 1.83810800  | 0.07678800  | 0.05760300  |
| O     | 1.22156500  | -0.65720800 | 1.14747700  |
| O     | 1.49707400  | 1.46543100  | -0.07088500 |
| O     | 1.56577000  | -0.68493700 | -1.28834900 |
| H     | 0.58261500  | -0.74670300 | -1.38965200 |
| C     | 3.58316300  | -0.12754000 | 0.14798100  |
| H     | 3.90252300  | 0.38176000  | 1.05269800  |
| H     | 3.79580100  | -1.19039300 | 0.19726700  |
| H     | 4.01694800  | 0.33258200  | -0.73418000 |

396

397 (MSA)<sub>2</sub>·(MA)<sub>1</sub>:

| Atoms | X           | Y           | Z           |
|-------|-------------|-------------|-------------|
| N     | 0.77377400  | 2.33273000  | -0.72007100 |
| H     | -0.12344400 | 1.81205000  | -0.63298100 |
| H     | 0.70873400  | 2.94627200  | -1.52667500 |
| C     | 1.06893900  | 3.07984700  | 0.52553600  |
| H     | 1.13538400  | 2.35191400  | 1.32733100  |
| H     | 2.01515300  | 3.60039600  | 0.41425300  |
| H     | 0.27040300  | 3.78865900  | 0.72150900  |
| S     | 1.78237900  | -0.73183800 | -0.07931400 |
| O     | 0.97900500  | -1.71451000 | -0.77475000 |
| O     | 1.01601400  | -0.01631700 | 0.98562700  |
| O     | 2.44644400  | 0.26163400  | -0.94456300 |
| H     | 1.51030900  | 1.59290300  | -0.89430700 |
| C     | 3.08399800  | -1.58801200 | 0.75961300  |
| H     | 2.62704200  | -2.30585300 | 1.43378300  |
| H     | 3.68115500  | -2.08983700 | 0.00417700  |
| H     | 3.67476800  | -0.85808300 | 1.30364400  |
| S     | -2.27077600 | -0.11980600 | 0.07022900  |
| O     | -1.57166900 | 0.93570200  | -0.65631500 |
| O     | -3.60267000 | 0.14925300  | 0.51545600  |
| O     | -1.41644100 | -0.53601400 | 1.29484500  |
| H     | -0.40953900 | -0.36815500 | 1.14170600  |

| Atoms | X           | Y           | Z           |
|-------|-------------|-------------|-------------|
| C     | -2.26653000 | -1.55293800 | -0.95696300 |
| H     | -1.23194700 | -1.78749300 | -1.19475900 |
| H     | -2.74328900 | -2.35259800 | -0.39828600 |
| H     | -2.84069900 | -1.30434100 | -1.84505300 |

398

399 (MSA)<sub>2</sub>·(SFA)<sub>1</sub>:

| Atoms | X           | Y           | Z           |
|-------|-------------|-------------|-------------|
| S     | 2.52743000  | -0.71148500 | -0.14183400 |
| O     | 2.90820300  | 0.51136000  | -0.78330500 |
| O     | 1.58584300  | -1.59151500 | -0.79223900 |
| O     | 2.00351900  | -0.40970500 | 1.31578000  |
| H     | 1.45015800  | 0.41335400  | 1.30413800  |
| C     | 3.96223800  | -1.64977700 | 0.27302000  |
| H     | 4.40002500  | -1.97384500 | -0.66693100 |
| H     | 4.64130000  | -1.00442000 | 0.82042800  |
| H     | 3.65124500  | -2.50269700 | 0.86790500  |
| S     | -0.42701700 | 1.98282900  | 0.13143100  |
| O     | -0.07121400 | 1.02086100  | -1.02683400 |
| O     | 0.49235900  | 1.78270300  | 1.22916800  |
| O     | -1.84240000 | 1.90386800  | 0.42456100  |
| H     | -2.81091600 | 0.47366600  | 0.73318600  |
| C     | -0.06840500 | 3.54794800  | -0.58635900 |
| H     | 0.96705300  | 3.51572000  | -0.91411500 |
| H     | -0.74762400 | 3.69812200  | -1.41922100 |
| H     | -0.21389100 | 4.29656500  | 0.18684600  |
| S     | -2.27646000 | -1.36500200 | -0.10543000 |
| O     | -1.91443900 | -0.69864200 | -1.34619700 |
| O     | -3.20210000 | -0.43026000 | 0.73613800  |
| O     | -2.92055400 | -2.62841400 | -0.16503600 |
| N     | -0.89922500 | -1.33250300 | 0.77900000  |
| H     | -0.81598800 | 0.34628600  | -1.20558800 |
| H     | -0.09723000 | -1.62350500 | 0.21396600  |
| H     | -0.98954000 | -1.88427000 | 1.62345200  |

400

401 (MSA)<sub>2</sub>·(SFA)<sub>1</sub>·(MA)<sub>1</sub>:

| Atoms | X           | Y           | Z           |
|-------|-------------|-------------|-------------|
| N     | -0.01836400 | -1.95799700 | -0.00643000 |
| H     | -0.82136400 | -2.22276500 | -0.57918200 |
| H     | -0.11511600 | -0.94337600 | 0.14944200  |
| C     | 0.03307900  | -2.69035900 | 1.27720000  |
| H     | -0.86421200 | -2.45747000 | 1.84147700  |
| H     | 0.09492300  | -3.75638400 | 1.08121000  |
| H     | 0.91601500  | -2.35127600 | 1.80909200  |

| Atoms | X           | Y           | Z           |
|-------|-------------|-------------|-------------|
| S     | 2.97123300  | -0.56608400 | -0.28750300 |
| O     | 2.25698800  | -0.46957300 | 0.99329500  |
| O     | 2.99724300  | 0.71745400  | -1.01351900 |
| O     | 2.49667100  | -1.68850200 | -1.09859500 |
| H     | 0.87130000  | -2.04901900 | -0.53861800 |
| C     | 4.66585900  | -0.91077800 | 0.09276000  |
| H     | 5.04325800  | -0.09693000 | 0.70394400  |
| H     | 4.70286500  | -1.85323700 | 0.63015300  |
| H     | 5.20891400  | -0.97681000 | -0.84508400 |
| S     | 0.07030500  | 1.93796800  | 0.17680600  |
| O     | 1.40644000  | 2.52636300  | -0.32630200 |
| O     | -0.91243800 | 2.97549800  | 0.17751000  |
| O     | -0.19621500 | 0.72820600  | -0.57722300 |
| N     | 0.29262100  | 1.47013200  | 1.73228300  |
| H     | 2.05193800  | 1.76743200  | -0.62180400 |
| H     | 1.10741000  | 0.85573300  | 1.77787900  |
| H     | 0.40617500  | 2.29165600  | 2.31348500  |
| S     | -3.10874900 | -0.56855500 | -0.21106800 |
| O     | -2.67194700 | -1.50952400 | -1.20438000 |
| O     | -2.42560900 | -0.52378200 | 1.05427500  |
| O     | -4.64133900 | -0.90950600 | 0.11020400  |
| H     | -4.73989900 | -0.92357100 | 1.07033900  |
| C     | -3.25821200 | 1.02610400  | -0.94045500 |
| H     | -2.28890600 | 1.26274000  | -1.36740600 |
| H     | -4.03181800 | 0.95696000  | -1.69938100 |
| H     | -3.50859100 | 1.73522300  | -0.15742500 |

402

403

**(MSA)<sub>2</sub>·(SFA)<sub>1</sub>·(MA)<sub>2</sub>:**

| Atoms | X           | Y           | Z           |
|-------|-------------|-------------|-------------|
| N     | 0.16668400  | -1.40622000 | -1.81642600 |
| H     | 0.86192800  | -0.69087000 | -2.05986400 |
| H     | -0.78549300 | -1.02199400 | -1.88877200 |
| C     | 0.35827100  | -2.66087900 | -2.56378000 |
| H     | 1.37414600  | -3.00545500 | -2.39632800 |
| H     | -0.35034400 | -3.39620200 | -2.19518800 |
| H     | 0.19375200  | -2.48504000 | -3.62212600 |
| N     | 0.14550400  | 0.06960000  | 2.07231900  |
| H     | -0.31587700 | -0.54726600 | 1.37989300  |
| H     | -0.48282800 | 0.85332800  | 2.23774500  |
| C     | 0.44922800  | -0.71262300 | 3.28645700  |
| H     | 1.11551600  | -1.51632700 | 2.98892900  |
| H     | 0.92981300  | -0.07580000 | 4.02279600  |
| H     | -0.47375300 | -1.12221000 | 3.68542400  |
| S     | 2.74583800  | -0.45661500 | 0.03157100  |

| Atoms | X           | Y           | Z           |
|-------|-------------|-------------|-------------|
| O     | 2.70448800  | -0.22950000 | -1.40734800 |
| O     | 1.82610400  | -1.51935100 | 0.47658500  |
| O     | 2.57029000  | 0.76370100  | 0.84975900  |
| H     | 1.01581300  | 0.42577900  | 1.63236700  |
| C     | 4.38486300  | -1.02761700 | 0.40480400  |
| H     | 4.55312500  | -1.94687400 | -0.14769800 |
| H     | 5.08297200  | -0.25638100 | 0.09368400  |
| H     | 4.44775000  | -1.20017900 | 1.47477200  |
| S     | -2.55764800 | -0.92111400 | 0.15404000  |
| O     | -2.64544500 | 0.34721600  | 0.92258200  |
| O     | -1.41174900 | -1.72750200 | 0.60766300  |
| O     | -2.59912800 | -0.74169800 | -1.29006800 |
| H     | 0.33447000  | -1.56054300 | -0.81153700 |
| C     | -4.01354200 | -1.82084300 | 0.60958000  |
| H     | -4.87399000 | -1.23157800 | 0.30753900  |
| H     | -3.99139700 | -2.77200200 | 0.08661200  |
| H     | -3.99880000 | -1.96705300 | 1.68498000  |
| S     | -0.39653100 | 2.31080400  | -0.59342100 |
| O     | -1.85940200 | 2.50548300  | -0.13307900 |
| O     | -0.10578800 | 0.89943600  | -0.66751000 |
| O     | -0.17161600 | 3.15349600  | -1.72134300 |
| N     | 0.46783300  | 2.82352500  | 0.72990500  |
| H     | -2.21323500 | 1.63108600  | 0.26944500  |
| H     | 0.50622100  | 3.83670100  | 0.73300400  |
| H     | 1.40856800  | 2.43286300  | 0.62842300  |

404

405

(MSA)<sub>2</sub>·(SFA)<sub>1</sub>·(MA)<sub>3</sub>:

| Atoms | X           | Y           | Z           |
|-------|-------------|-------------|-------------|
| N     | 0.12925400  | -0.14997600 | -2.00791100 |
| H     | 0.32017300  | 0.85426700  | -1.85972900 |
| H     | -0.88374800 | -0.29910000 | -1.93395900 |
| C     | 0.71810800  | -0.66402300 | -3.25714400 |
| H     | 1.78521900  | -0.46746400 | -3.21954900 |
| H     | 0.53850500  | -1.73351700 | -3.31030400 |
| H     | 0.27081300  | -0.16243500 | -4.11010200 |
| N     | 0.39547900  | -1.22532500 | 1.92241200  |
| H     | 0.77753200  | -1.63266600 | 1.05003800  |
| H     | -0.62760700 | -1.31653200 | 1.87995200  |
| C     | 1.01508200  | -1.82868200 | 3.11670100  |
| H     | 2.08324400  | -1.64811800 | 3.05886200  |
| H     | 0.60371100  | -1.36800700 | 4.00977000  |
| H     | 0.80706900  | -2.89429600 | 3.12468800  |
| S     | 2.93349500  | -0.54632900 | -0.10204700 |
| O     | 2.74640900  | 0.61091600  | -0.97869400 |



| Atoms | X           | Y           | Z           |
|-------|-------------|-------------|-------------|
| O     | 1.94722300  | -1.61572000 | -0.39364500 |
| O     | 2.97581600  | -0.21469100 | 1.31858000  |
| H     | 0.60681200  | -0.22513000 | 1.83081200  |
| C     | 4.51517300  | -1.24260800 | -0.51574900 |
| H     | 4.49502400  | -1.52895100 | -1.56306300 |
| H     | 5.26876400  | -0.48158800 | -0.33689000 |
| H     | 4.67937000  | -2.10801900 | 0.11896800  |
| S     | -2.31210500 | -1.67165000 | -0.13856400 |
| O     | -2.45423000 | -1.13647000 | 1.23803200  |
| O     | -1.01955500 | -2.30323000 | -0.36207000 |
| O     | -2.65302100 | -0.65405100 | -1.14148800 |
| H     | 0.55701700  | -0.65439100 | -1.21702900 |
| C     | -3.54289100 | -2.94304500 | -0.28129000 |
| H     | -4.51851100 | -2.49164500 | -0.12872000 |
| H     | -3.46425400 | -3.36817000 | -1.27733700 |
| H     | -3.33962100 | -3.69451700 | 0.47553700  |
| S     | 0.05968500  | 2.38321900  | 0.20389000  |
| O     | -0.86065400 | 3.30360400  | 0.88197600  |
| O     | -0.24651900 | 0.97607100  | 0.51831900  |
| O     | 0.11125400  | 2.59243600  | -1.24389200 |
| N     | 1.53311300  | 2.66502200  | 0.89716500  |
| H     | -2.21031900 | 2.26085600  | 1.19122300  |
| H     | 1.76797500  | 3.64060000  | 0.75171800  |
| H     | 2.21641800  | 2.07053100  | 0.42426500  |
| H     | -3.78445300 | 1.71378900  | 1.49472200  |
| N     | -2.99215200 | 1.65107600  | 0.86359400  |
| H     | -2.65421900 | 0.67020500  | 0.86970200  |
| C     | -3.34075000 | 2.10196800  | -0.50856500 |
| H     | -4.08520000 | 1.43524200  | -0.92685700 |
| H     | -3.69541200 | 3.12662700  | -0.45361900 |
| H     | -2.43346600 | 2.06042400  | -1.10304100 |

406

407 (MSA)<sub>2</sub>·(MA)<sub>2</sub>:

| Atoms | X           | Y           | Z           |
|-------|-------------|-------------|-------------|
| N     | 0.11192700  | -2.09657100 | 0.01406700  |
| H     | 0.88599900  | -1.72297100 | -0.57703400 |
| H     | -0.69082900 | -2.37208200 | -0.55919700 |
| C     | 0.63550000  | -3.16287400 | 0.88977300  |
| H     | 1.44362000  | -2.73873300 | 1.47811600  |
| H     | -0.15595000 | -3.51655400 | 1.54308900  |
| H     | 1.01051100  | -3.97914600 | 0.28048900  |
| N     | -0.11192300 | 2.09657300  | 0.01402900  |
| H     | 0.24452800  | 1.30262100  | 0.57021500  |
| H     | -0.88599500 | 1.72295200  | -0.57705800 |

| Atoms | X           | Y           | Z           |
|-------|-------------|-------------|-------------|
| C     | -0.63551500 | 3.16286000  | 0.88974300  |
| H     | 0.15593300  | 3.51656500  | 1.54304800  |
| H     | -1.01056100 | 3.97912000  | 0.28046500  |
| H     | -1.44361300 | 2.73869200  | 1.47809700  |
| S     | 2.55170800  | 0.17194000  | -0.22445200 |
| O     | 2.38340100  | -1.01980300 | -1.07173500 |
| O     | 1.65768900  | 0.10853800  | 0.95327600  |
| O     | 2.43510000  | 1.43813200  | -0.94524300 |
| H     | 0.69081300  | 2.37210700  | -0.55925000 |
| C     | 4.21080900  | 0.09765900  | 0.39822800  |
| H     | 4.32519500  | -0.83359800 | 0.94431900  |
| H     | 4.88201500  | 0.13222100  | -0.45454200 |
| H     | 4.36384300  | 0.95349200  | 1.04822000  |
| S     | -2.55170700 | -0.17193900 | -0.22441200 |
| O     | -2.38340600 | 1.01978100  | -1.07172700 |
| O     | -1.65767400 | -0.10851100 | 0.95330200  |
| O     | -2.43511300 | -1.43815000 | -0.94517500 |
| H     | -0.24448900 | -1.30260900 | 0.57025800  |
| C     | -4.21080000 | -0.09763700 | 0.39828400  |
| H     | -4.88201600 | -0.13222300 | -0.45447700 |
| H     | -4.36382800 | -0.95345100 | 1.04830400  |
| H     | -4.32517800 | 0.83363600  | 0.94434900  |

408

409 (SFA)<sub>2</sub>:

| Atoms | X            | Y           | Z           |
|-------|--------------|-------------|-------------|
| S     | 1.94099500   | -0.03812100 | 0.08938100  |
| O     | 1.63046500   | -1.04323800 | -1.07511700 |
| O     | 1.04729800   | -0.35013200 | 1.18230000  |
| O     | 3.34887100   | -0.05958700 | 0.27474000  |
| N     | 1.49427800   | 1.41063700  | -0.52020200 |
| H     | 0.66552400   | -1.03200800 | -1.23859600 |
| H     | 2.26943500   | 2.05706800  | -0.51766900 |
| H     | 0.64845500   | 1.76287600  | -0.08507300 |
| S     | -1.77388000  | 0.05080700  | -0.03323800 |
| O     | -1.58921400  | -0.81218800 | 1.25792500  |
| O     | -1.44539400  | 1.41799300  | 0.24642600  |
| O     | -1.11402100  | -0.61602500 | -1.12949300 |
| N     | -3.38451100  | -0.08175900 | -0.23469000 |
| H     | -0.62312900  | -0.80874100 | 1.45154100  |
| H     | -3.82181100  | 0.82871500  | -0.20954800 |
| H     | -3.604734000 | -0.60761700 | -1.06893400 |

410 (SFA)<sub>2</sub>·(MA)<sub>1</sub>:

| Atoms | X            | Y           | Z           |
|-------|--------------|-------------|-------------|
| H     | -1.55598100  | 1.64215800  | -0.82412500 |
| N     | -0.75339900  | 2.31448400  | -0.70620500 |
| C     | -0.86366600  | 3.06419700  | 0.56761200  |
| H     | -0.70215000  | 2.93064900  | -1.51176300 |
| H     | -0.96187800  | 2.33044600  | 1.36011700  |
| H     | -1.74007700  | 3.70407000  | 0.53557700  |
| H     | 0.03260800   | 3.65947600  | 0.71215000  |
| S     | 2.18332300   | -0.21522100 | -0.06969500 |
| O     | 1.46037100   | 0.74981100  | -0.87374900 |
| O     | 1.59510000   | -1.62287500 | -0.36720700 |
| O     | 3.59809200   | -0.30427200 | -0.18149900 |
| N     | 1.82945000   | 0.13521800  | 1.49394200  |
| H     | 0.10097800   | 1.71690000  | -0.70099900 |
| H     | 2.39872200   | -0.44695700 | 2.09651700  |
| H     | 0.83355000   | -0.01815700 | 1.65367100  |
| S     | -1.73988300  | -0.68039800 | -0.03031400 |
| O     | -0.93075900  | -1.56916800 | -0.86169100 |
| O     | -0.98739200  | 0.00111800  | 1.01975400  |
| O     | -2.52334600  | 0.28531900  | -0.81585100 |
| N     | -2.77835100  | -1.71004000 | 0.75583900  |
| H     | 0.60346700   | -1.58335200 | -0.56820200 |
| H     | -3.20110500  | -2.32122400 | 0.06612600  |
| H     | -3.50160500v | -1.16640100 | 1.21230600  |

411

412

**(SFA)<sub>2</sub>·(MA)<sub>2</sub>:**

| Atoms | X           | Y           | Z           |
|-------|-------------|-------------|-------------|
| H     | 0.76020400  | 1.28556600  | 0.89213400  |
| S     | -2.35222000 | 0.21155500  | -0.28299200 |
| O     | -1.80732900 | 1.29217100  | -1.09680500 |
| O     | -2.36089700 | -1.09653400 | -0.91469700 |
| O     | -1.72908500 | 0.14382700  | 1.05856500  |
| N     | 0.14628500  | 2.10390900  | 0.68572400  |
| H     | -0.34751800 | 1.88761700  | -0.19979300 |
| C     | 0.91480000  | 3.36288200  | 0.61782300  |
| H     | 1.38284800  | 3.54800200  | 1.58014700  |
| H     | 0.24642600  | 4.18073500  | 0.36656000  |
| H     | 1.67517800  | 3.23817600  | -0.14530500 |
| H     | -0.76023900 | -1.28573200 | 0.89189800  |
| S     | 2.35222300  | -0.21150500 | -0.28298500 |
| O     | 1.72906200  | -0.14399900 | 1.05857100  |
| O     | 1.80735900  | -1.29199800 | -1.09697900 |
| O     | 2.36089700  | 1.09668400  | -0.91448000 |
| N     | -0.14630300 | -2.10402700 | 0.68535500  |
| H     | 0.34751600  | -1.88757300 | -0.20011400 |

| Atoms | X           | Y           | Z           |
|-------|-------------|-------------|-------------|
| C     | -0.91479500 | -3.36300100 | 0.61721500  |
| H     | -1.38286700 | -3.54829500 | 1.57949400  |
| H     | -0.24640000 | -4.18080000 | 0.36583000  |
| H     | -1.67515500 | -3.23817900 | -0.14591200 |
| N     | -3.92072900 | 0.70686800  | 0.02811700  |
| H     | -4.34639200 | 0.93071600  | -0.86510000 |
| H     | -4.42428200 | -0.07201300 | 0.43792400  |
| N     | 3.92073200  | -0.70685000 | 0.02807300  |
| H     | 4.34640900  | -0.93056100 | -0.86517100 |
| H     | 4.42427300  | 0.07197600  | 0.43800300  |
| H     | -0.59422900 | 2.09959700  | 1.38544100  |
| H     | 0.59419800  | -2.09982700 | 1.38508600  |

413

414 (MSA)<sub>3</sub>:

| Atoms | X           | Y           | Z           |
|-------|-------------|-------------|-------------|
| S     | -0.99750600 | 1.99166100  | 0.10351800  |
| O     | -0.04095400 | 1.87612400  | 1.16639600  |
| O     | -2.30343300 | 1.37811400  | 0.27254600  |
| O     | -0.39749100 | 1.45690400  | -1.23071000 |
| S     | 2.78804600  | -0.28282000 | -0.12524000 |
| O     | 2.21335000  | -1.73915200 | -0.24575500 |
| H     | 1.23319900  | -1.70421500 | -0.13827500 |
| O     | 1.99242800  | 0.60087800  | -0.96504600 |
| O     | 4.18743500  | -0.35911600 | -0.38173400 |
| H     | 0.52793000  | 1.07692500  | -1.08118500 |
| C     | -1.27984700 | 3.68991700  | -0.27640800 |
| H     | -1.76574500 | 4.13077500  | 0.58920300  |
| H     | -0.31541900 | 4.15133800  | -0.46434600 |
| H     | -1.92194700 | 3.73555700  | -1.15043700 |
| C     | 2.48310300  | 0.13032500  | 1.56122300  |
| H     | 3.06616000  | -0.55422300 | 2.16932700  |
| H     | 2.80623600  | 1.15849700  | 1.69716500  |
| H     | 1.41537000  | 0.04494300  | 1.74310600  |
| S     | -1.61543300 | -1.86135800 | 0.08338200  |
| O     | -1.66525400 | -3.25982300 | 0.35366400  |
| O     | -0.34477700 | -1.15975000 | 0.20769400  |
| O     | -2.63988700 | -1.15345000 | 1.03310400  |
| H     | -2.54164900 | -0.17445500 | 0.92431600  |
| C     | -2.24555400 | -1.51715200 | -1.52926300 |
| H     | -3.23400200 | -1.96009400 | -1.60074400 |
| H     | -2.26993200 | -0.43718300 | -1.65052400 |
| H     | -1.55945100 | -1.97198800 | -2.23874600 |

415 (MSA)<sub>3</sub>·(MA)<sub>1</sub>:

| Atoms | X           | Y           | Z           |
|-------|-------------|-------------|-------------|
| N     | 0.33303400  | -0.03735500 | 2.17339700  |
| H     | -0.17968800 | -0.56037900 | 1.44510100  |
| H     | 0.77822400  | 0.77905100  | 1.71222800  |
| C     | -0.61861200 | 0.39570100  | 3.22100400  |
| H     | -1.34169600 | 1.05274100  | 2.74793900  |
| H     | -1.12506600 | -0.47648400 | 3.62071500  |
| H     | -0.07948200 | 0.92217200  | 4.00232700  |
| S     | 0.10369400  | 2.14871500  | -0.34584400 |
| O     | 0.41741600  | 1.23576600  | -1.47065300 |
| O     | 1.16165500  | 2.15939600  | 0.66265600  |
| O     | -1.21374600 | 1.86024900  | 0.24056700  |
| H     | 1.08876900  | -0.63288300 | 2.50781900  |
| C     | 0.01365700  | 3.77136600  | -1.04087100 |
| H     | 0.98656400  | 4.00291400  | -1.46335500 |
| H     | -0.75514200 | 3.76197200  | -1.80754000 |
| H     | -0.23994700 | 4.45836100  | -0.23956100 |
| S     | -2.64975500 | -1.20520500 | -0.25443700 |
| O     | -3.81370900 | -2.03234000 | -0.30032000 |
| O     | -1.85157100 | -1.19092400 | 0.95707200  |
| O     | -3.10368600 | 0.26332200  | -0.56351800 |
| H     | -2.38182300 | 0.90011000  | -0.29319700 |
| C     | -1.59171500 | -1.57980000 | -1.61551600 |
| H     | -1.16680600 | -2.56171800 | -1.42967300 |
| H     | -2.20691500 | -1.57154300 | -2.51002900 |
| H     | -0.80903400 | -0.82610800 | -1.64898400 |
| S     | 2.44299900  | -1.12526600 | -0.12023000 |
| O     | 1.08596500  | -1.63099700 | -0.11938300 |
| O     | 2.95637500  | -0.68703500 | 1.15571400  |
| O     | 2.58509100  | -0.01831400 | -1.19558000 |
| H     | 1.70204900  | 0.50913800  | -1.30772600 |
| C     | 3.53608000  | -2.34399200 | -0.77711600 |
| H     | 3.54681700  | -3.16900100 | -0.07099700 |
| H     | 3.15341300  | -2.65617900 | -1.74323100 |
| H     | 4.52073700  | -1.89520400 | -0.86488300 |

416

417

(MSA)<sub>3</sub>·(MA)<sub>2</sub>:

| Atoms | X           | Y           | Z           |
|-------|-------------|-------------|-------------|
| N     | 0.81161200  | -0.82222900 | -1.85056500 |
| H     | 0.89265000  | 0.10493900  | -1.42122000 |
| H     | 0.17907000  | -1.38783200 | -1.25578400 |
| C     | 0.22868100  | -0.74546000 | -3.20471200 |
| H     | -0.75870800 | -0.30208700 | -3.11948900 |
| H     | 0.86519900  | -0.13581600 | -3.83847800 |
| H     | 0.14529300  | -1.74819600 | -3.61138400 |

| Atoms | X           | Y           | Z           |
|-------|-------------|-------------|-------------|
| N     | 0.62135600  | 0.67595500  | 1.80677100  |
| H     | 0.07530400  | 1.54369300  | 1.78829400  |
| H     | 1.37504800  | 0.76400900  | 1.09367400  |
| C     | 1.15621200  | 0.36468800  | 3.15127900  |
| H     | 0.32542200  | 0.25388300  | 3.84149900  |
| H     | 1.73468800  | -0.54943500 | 3.08482700  |
| H     | 1.80447100  | 1.17489000  | 3.46993700  |
| S     | -2.11390700 | -1.82449300 | 0.25407300  |
| O     | -1.18528900 | -2.35854400 | -0.73860200 |
| O     | -3.17953700 | -0.99078600 | -0.37609200 |
| O     | -1.47501000 | -1.13375500 | 1.37200300  |
| H     | -0.03552100 | -0.05882100 | 1.49728800  |
| C     | -2.98071500 | -3.21256400 | 0.92483500  |
| H     | -3.68243600 | -2.83952600 | 1.66422000  |
| H     | -3.49614100 | -3.70794400 | 0.10784700  |
| H     | -2.24396800 | -3.86977100 | 1.37657100  |
| S     | 3.46928900  | -0.18155000 | -0.03773500 |
| O     | 3.37111300  | -0.69378500 | 1.32120700  |
| O     | 2.45123600  | 0.87727600  | -0.28606700 |
| O     | 3.43693200  | -1.20446900 | -1.09043300 |
| H     | 1.77152200  | -1.20681800 | -1.81147100 |
| C     | 5.04475100  | 0.62016600  | -0.18709000 |
| H     | 5.10148900  | 1.39466000  | 0.57147900  |
| H     | 5.80980900  | -0.13414000 | -0.02928500 |
| H     | 5.11693300  | 1.04270400  | -1.18431700 |
| S     | -1.80110300 | 2.03746600  | -0.13193700 |
| O     | -0.88459700 | 1.09400100  | -0.75073600 |
| O     | -1.33163000 | 2.67891100  | 1.07826300  |
| O     | -3.15780300 | 1.37960400  | 0.09970400  |
| H     | -3.14963000 | 0.29832800  | -0.10451500 |
| C     | -2.17597200 | 3.31269500  | -1.29561200 |
| H     | -2.56549200 | 2.84544100  | -2.19447600 |
| H     | -2.91356100 | 3.96705400  | -0.84103700 |
| H     | -1.25172700 | 3.84714300  | -1.49422000 |

418

419 (MSA)<sub>3</sub>·(MA)<sub>3</sub>:

| Atoms | X          | Y          | Z           |
|-------|------------|------------|-------------|
| N     | 2.91376300 | 1.57069900 | -0.43565700 |
| H     | 2.73386200 | 1.04460100 | 0.43311400  |
| H     | 2.26991500 | 2.39969800 | -0.46019100 |
| C     | 4.34508000 | 1.89122500 | -0.58031200 |
| H     | 4.91677900 | 0.96834900 | -0.54542900 |
| H     | 4.50888400 | 2.39121200 | -1.52985200 |
| H     | 4.64787500 | 2.54438800 | 0.23193000  |

| Atoms | X           | Y           | Z           |
|-------|-------------|-------------|-------------|
| N     | -0.31584900 | -1.15465800 | -1.94710900 |
| H     | -0.46152900 | -0.16188700 | -1.71295200 |
| H     | -0.80866700 | -1.64680200 | -1.17894400 |
| C     | -0.86681600 | -1.51002900 | -3.26881600 |
| H     | -0.34524100 | -0.95113600 | -4.04019000 |
| H     | -0.73340800 | -2.57452700 | -3.43652900 |
| H     | -1.92097200 | -1.25321700 | -3.26703200 |
| N     | -0.32538100 | -0.34130800 | 2.03027200  |
| H     | -0.51607100 | 0.66646200  | 1.88837900  |
| H     | 0.68957100  | -0.47551700 | 1.99821500  |
| C     | -0.94517800 | -0.84807900 | 3.26943600  |
| H     | -2.01326400 | -0.66824800 | 3.19779700  |
| H     | -0.74872300 | -1.91275800 | 3.35226100  |
| H     | -0.53153100 | -0.32195000 | 4.12451700  |
| S     | -0.12606000 | 2.44552000  | 0.07203700  |
| O     | -2.92603800 | 0.41901100  | 1.00460900  |
| O     | 0.91460100  | 3.38946700  | -0.38149900 |
| O     | -0.29222200 | 2.42487700  | 1.52529700  |
| H     | -0.72325000 | -0.84764700 | 1.22422500  |
| C     | -1.65511000 | 2.98882900  | -0.62588300 |
| H     | -1.82543000 | 3.99935800  | -0.26582900 |
| H     | -1.55947400 | 2.96788900  | -1.70710300 |
| H     | -2.42358400 | 2.30118000  | -0.28319000 |
| S     | 2.31911600  | -1.66583600 | 0.20218400  |
| O     | 1.02448100  | -2.31675300 | 0.35346400  |
| O     | 2.57357300  | -0.64585600 | 1.24252400  |
| O     | 2.53231900  | -1.13338100 | -1.16140000 |
| H     | 0.68939900  | -1.33605400 | -1.85115800 |
| C     | 3.56219500  | -2.90920100 | 0.43557500  |
| H     | 3.41071100  | -3.67609700 | -0.31791500 |
| H     | 4.53587400  | -2.44191600 | 0.32388800  |
| H     | 3.43937300  | -3.31760200 | 1.43398000  |
| S     | -2.99056500 | -0.57104200 | -0.06554500 |
| O     | -2.03132400 | -1.68628300 | 0.16580800  |
| O     | -2.85944200 | -0.02242700 | -1.41577900 |
| O     | 0.15214200  | 1.08758000  | -0.45724200 |
| H     | 2.59949700  | 0.89803600  | -1.14152600 |
| C     | -4.60105600 | -1.31651600 | 0.02429800  |
| H     | -4.66968400 | -2.07377500 | -0.75063400 |
| H     | -4.71216400 | -1.75816100 | 1.00993800  |
| H     | -5.33573700 | -0.53253200 | -0.13317100 |

420

421 (SFA)<sub>3</sub>:

| Atoms | X           | Y           | Z           |
|-------|-------------|-------------|-------------|
| S     | 0.06337000  | 2.08953700  | -0.09723500 |
| O     | -0.15395600 | 1.45280300  | 1.33737800  |
| O     | -0.04441300 | 1.01749200  | -1.06067600 |
| O     | -0.81700200 | 3.20299700  | -0.12865700 |
| N     | 1.59933900  | 2.57815300  | -0.19645700 |
| H     | 0.39982700  | 0.63825100  | 1.40691700  |
| H     | 1.86851800  | 3.20779600  | 0.54628200  |
| H     | 2.23784000  | 1.80331000  | -0.36495200 |
| S     | 2.23090000  | -1.00044900 | 0.01908600  |
| O     | 1.11422100  | -1.78949600 | -0.72159200 |
| O     | 2.86575800  | -0.08826400 | -0.88124400 |
| O     | 1.68491500  | -0.49916200 | 1.25831800  |
| N     | 3.35485300  | -2.11457900 | 0.41833100  |
| H     | 0.22532000  | -1.63839400 | -0.27562800 |
| H     | 3.84214100  | -2.43939200 | -0.40783300 |
| H     | 2.94941400  | -2.87981100 | 0.94332900  |
| S     | -2.40389800 | -1.05929100 | 0.01333000  |
| O     | -2.20023900 | -0.50155300 | -1.43875400 |
| O     | -3.41774400 | -2.04479500 | -0.08299400 |
| O     | -1.09327700 | -1.37974600 | 0.55139400  |
| N     | -2.93394500 | 0.15891600  | 0.94891700  |
| H     | -1.42544600 | 0.10894000  | -1.44170500 |
| H     | -2.20495100 | 0.82869000  | 1.17127700  |
| H     | -3.78644000 | 0.57424500  | 0.59848700  |

422

423

(SFA)<sub>3</sub>·(MA)<sub>1</sub>:

| Atoms | X           | Y           | Z           |
|-------|-------------|-------------|-------------|
| H     | 0.89701500  | -2.30972500 | -0.37448600 |
| N     | 0.05884800  | -2.06671500 | 0.16302500  |
| C     | 0.11349700  | -2.55308400 | 1.56121000  |
| H     | -0.78284400 | -2.37739300 | -0.32657800 |
| H     | 1.00508300  | -2.13948400 | 2.02071300  |
| H     | 0.15653800  | -3.63781300 | 1.56557000  |
| H     | -0.78239900 | -2.20970900 | 2.06751900  |
| S     | -0.05397900 | 1.69157400  | 0.23185300  |
| O     | -0.05146100 | 0.49691200  | -0.63684900 |
| O     | 1.19074300  | 2.44540500  | 0.03653400  |
| O     | -1.27917100 | 2.46284500  | 0.07174700  |
| N     | -0.02992100 | 1.25612600  | 1.81895100  |
| H     | 0.01720200  | -1.02386100 | 0.10807800  |
| H     | -0.86838600 | 0.72276100  | 2.02785900  |
| H     | 0.81579900  | 0.72621900  | 2.00451100  |
| S     | 2.96834600  | -0.40183700 | -0.30260100 |
| O     | 2.94821200  | 0.99594400  | -0.93590700 |



| Atoms | X           | Y           | Z           |
|-------|-------------|-------------|-------------|
| O     | 2.36751100  | -0.35609100 | 1.00986600  |
| O     | 2.48061100  | -1.39950000 | -1.21912800 |
| N     | 4.56245300  | -0.73753000 | -0.09345900 |
| H     | 2.18695000  | 1.61757600  | -0.53712300 |
| H     | 5.01462600  | 0.00579900  | 0.42589800  |
| H     | 5.00606500  | -0.86813000 | -0.99515200 |
| S     | -3.13934300 | -0.46354400 | -0.20105600 |
| O     | -3.34527300 | 1.04690200  | -0.47482100 |
| O     | -2.27320600 | -0.62405900 | 0.94409900  |
| O     | -4.41097100 | -1.10011300 | -0.23400400 |
| N     | -2.27925400 | -1.05307000 | -1.49711400 |
| H     | -2.52230700 | 1.60270600  | -0.24614200 |
| H     | -2.90929700 | -1.13907000 | -2.28640100 |
| H     | -1.51623900 | -0.40810600 | -1.70476300 |

424

425

(SFA)<sub>3</sub>·(MA)<sub>2</sub>:

| Atoms | X           | Y           | Z           |
|-------|-------------|-------------|-------------|
| H     | -0.44769100 | -0.36772000 | 1.30094700  |
| S     | 2.75847200  | -0.51575700 | 0.34769200  |
| O     | 2.54547700  | -1.00614000 | 1.70533400  |
| O     | 2.96802300  | -1.52013000 | -0.67365100 |
| O     | 1.68905000  | 0.42694800  | -0.06523100 |
| N     | -0.00768900 | 0.01115800  | 2.15184700  |
| H     | 0.94569500  | -0.40055100 | 2.18716400  |
| C     | -0.83538700 | -0.29280900 | 3.33939700  |
| H     | -1.81279300 | 0.16143500  | 3.20550900  |
| H     | -0.35311900 | 0.10932000  | 4.22489300  |
| H     | -0.94350900 | -1.36912000 | 3.41028100  |
| H     | 0.85374700  | -0.36365400 | -1.34206700 |
| S     | -1.91838200 | -1.94656600 | -0.08122600 |
| O     | -1.48387000 | -0.52926900 | -0.26011600 |
| O     | -1.43727300 | -2.72258300 | -1.21430700 |
| O     | -1.59625500 | -2.43800700 | 1.23806100  |
| N     | 0.36827200  | -0.68681300 | -2.20597100 |
| H     | -0.11036300 | -1.57280000 | -1.98853500 |
| C     | 1.32921600  | -0.78864300 | -3.32255700 |
| H     | 1.76129200  | 0.19299200  | -3.49317400 |
| H     | 0.81828800  | -1.13058900 | -4.21737400 |
| H     | 2.10894000  | -1.48412400 | -3.03039500 |
| N     | 4.11888200  | 0.44849200  | 0.49051500  |
| H     | 4.78452700  | -0.05630000 | 1.06536100  |
| H     | 4.52085300  | 0.57811600  | -0.43117600 |
| N     | -3.58204500 | -1.86733500 | -0.11709300 |
| H     | -3.89734700 | -1.83681600 | -1.07967400 |

| Atoms | X           | Y           | Z           |
|-------|-------------|-------------|-------------|
| H     | -3.93938400 | -2.70603100 | 0.32569900  |
| H     | 0.08976800  | 1.01844700  | 1.98144400  |
| H     | -0.35448100 | 0.01980400  | -2.35260800 |
| S     | -1.01002500 | 2.70621300  | -0.35987600 |
| O     | -2.07518500 | 1.84176800  | 0.38342000  |
| O     | -0.59697600 | 1.99830000  | -1.54316400 |
| O     | -1.51255300 | 4.03729100  | -0.42888400 |
| N     | 0.26766300  | 2.71493100  | 0.70381600  |
| H     | -1.98340800 | 0.87507500  | 0.10720200  |
| H     | 0.50340600  | 3.67464500  | 0.91963500  |
| H     | 1.05249500  | 2.19589300  | 0.30685600  |

426

427 (SFA)<sub>3</sub>·(MA)<sub>3</sub>:

| Atoms | X           | Y           | Z           |
|-------|-------------|-------------|-------------|
| H     | -1.44232900 | -1.95662000 | 0.76326700  |
| N     | -0.54015900 | -1.89680100 | 0.27057800  |
| C     | -0.65530700 | -2.55646300 | -1.05218600 |
| H     | 0.24638300  | -2.30817500 | 0.79577400  |
| H     | -1.46201600 | -2.08102400 | -1.60140800 |
| H     | -0.88185200 | -3.60689600 | -0.89678200 |
| H     | 0.29727700  | -2.45152000 | -1.56056000 |
| S     | 0.42241300  | 1.71245900  | -0.48167600 |
| O     | 0.12938600  | 0.85771400  | 0.68874600  |
| O     | -0.51308800 | 2.83804800  | -0.53817200 |
| O     | 1.82900800  | 2.09657600  | -0.54169200 |
| N     | 0.14487100  | 0.86746500  | -1.87867500 |
| H     | -0.33226000 | -0.88882500 | 0.17650700  |
| H     | 0.74970200  | 0.05026600  | -1.86488700 |
| H     | -0.83172100 | 0.58089700  | -1.88031200 |
| S     | -3.61105500 | -0.61224100 | -0.12070400 |
| O     | -4.57458000 | 0.38575600  | 0.34855700  |
| O     | -2.44609300 | 0.03287700  | -0.72859100 |
| O     | -3.26940000 | -1.61880400 | 0.87851500  |
| N     | -4.28983100 | -1.50279900 | -1.36521500 |
| H     | -3.47454900 | 1.86272400  | 0.41423900  |
| H     | -4.66710500 | -0.85765600 | -2.05089500 |
| H     | -5.05190700 | -2.04944200 | -0.97867200 |
| H     | 3.19203900  | 1.03454700  | -0.77876600 |
| N     | 4.22066900  | 0.87040200  | -0.85423400 |
| C     | 4.90338500  | 1.84524500  | 0.02658900  |
| H     | 4.48391000  | 0.98231000  | -1.82872200 |
| H     | 4.57443600  | 1.63415000  | 1.03830200  |
| H     | 4.59529400  | 2.84556400  | -0.26011700 |
| H     | 5.97946600  | 1.73043800  | -0.06012300 |

| Atoms | X           | Y           | Z           |
|-------|-------------|-------------|-------------|
| S     | 2.75946100  | -1.55089300 | 0.43324900  |
| O     | 4.18126400  | -1.77119100 | 0.18827800  |
| O     | 2.06044700  | -1.03378800 | -0.74860700 |
| O     | 2.06472800  | -2.66849200 | 1.06268400  |
| N     | 2.74388800  | -0.23346800 | 1.47718500  |
| H     | 4.40544200  | -0.11006800 | -0.56124600 |
| H     | 2.94943300  | -0.56214200 | 2.41355000  |
| H     | 1.81870700  | 0.19876600  | 1.44317300  |
| H     | -3.08804500 | 3.35440600  | 1.06353200  |
| N     | -2.74044600 | 2.41717300  | 0.88520000  |
| C     | -2.39105300 | 1.72091900  | 2.14854700  |
| H     | -1.88985600 | 2.50068300  | 0.26131200  |
| H     | -3.26422600 | 1.69658300  | 2.79291200  |
| H     | -1.56008900 | 2.23675000  | 2.61830500  |
| H     | -2.08768900 | 0.71351500  | 1.88839900  |
